# Supplementary material for: Microstructural Mapping of Arctica islandica Shells Reveals Environmental and Physiological Controls on Biomineral Size
Source: Frontiers journal article supplement (doi:10.3389/feart.2021.781305), 2022-01-18
Supplement: Table_1.XLSX [file Table_1.XLSX]

## Sheet: NE Iceland isotope data
Locality	Shell ID	Sample no.	Sampling method	Tray	Tray no.	Distance to previous (mm)	Total growth (mm)	Annual growth (%)	δ¹³C (‰)	δ¹³C sdev (‰)	δ¹⁸O (‰)	δ¹⁸O sdev (‰)	Increment	Year		Ontogenetic Age	Calendar Year	Increment width (mm)	Starting growth line at (mm)
Iceland	ICE06-6.2-A11R	1	drilling	L	D5	0.858	0.858		1.699	0.03	1.256	0.067	1	2000		1	2000	2.071	0
Iceland	ICE06-6.2-A11R	2	drilling	L	D6	1.213	2.071	0	1.581	0.024	2.807	0.055	2	2000		2	2001	3.361	2.071
Iceland	ICE06-6.2-A11R	3	drilling	L	D7	0.513	2.584	0.152633	2.113	0.018	2.443	0.059	2	2001		3	2002	3.806	5.432
Iceland	ICE06-6.2-A11R	4	drilling	L	D8	0.355	2.939	0.258256	2.582	0.015	2.105	0.068	2	2001		4	2003	4.854	9.238
Iceland	ICE06-6.2-A11R	5	drilling	L	D9	0.55	3.489	0.421898	2.786	0.065	2.085	0.062	2	2001		5	2004	1.929	14.092
Iceland	ICE06-6.2-A11R	6	drilling	L	D10	0.408	3.897	0.543291	2.693	0.034	1.691	0.056	2	2001		6	2005	3.227	16.021
Iceland	ICE06-6.2-A11R	7	drilling	L	D11	0.363	4.26	0.651294	2.558	0.025	1.704	0.074	2	2001		7	2006		19.248
Iceland	ICE06-6.2-A11R	8	drilling	L	D12	0.419	4.679	0.77596	2.681	0.024	1.77	0.072	2	2001
Iceland	ICE06-6.2-A11R	9	drilling	L	D13	0.331	5.01	0.874442	2.472	0.024	1.664	0.059	2	2001
Iceland	ICE06-6.2-A11R	10	drilling	L	D14	0.36	5.37	0.981553	2.041	0.027	2.005	0.079	2	2001
Iceland	ICE06-6.2-A11R	11	drilling	L	D15	0.518	5.888	0.119811	2.599	0.024	3.001	0.066	3	2002
Iceland	ICE06-6.2-A11R	12	drilling	XXVII	A1	0.517	6.405	0.255649	2.827	0.027	2.64	0.079	3	2002
Iceland	ICE06-6.2-A11R	13	drilling	XXVII	A2	0.394	6.799	0.35917	3.075	0.027	2.428	0.086	3	2002
Iceland	ICE06-6.2-A11R	14	drilling	XXVII	A3	0.424	7.223	0.470573	3.22	0.034	2.151	0.053	3	2002
Iceland	ICE06-6.2-A11R	15	drilling	XXVII	A4	0.413	7.636	0.579086	3.175	0.074	2.001	0.09	3	2002
Iceland	ICE06-6.2-A11R	16	drilling	XXVII	A5	0.425	8.061	0.690751	2.884	0.019	1.879	0.082	3	2002
Iceland	ICE06-6.2-A11R	17	drilling	XXVII	A6	0.352	8.413	0.783237	2.888	0.036	1.988	0.075	3	2002
Iceland	ICE06-6.2-A11R	18	drilling	XXVII	A7	0.459	8.872	0.903836	2.69	0.021	1.956	0.064	3	2002
Iceland	ICE06-6.2-A11R	19	drilling	XXVII	A8	0.219	9.091	0.961377
Iceland	ICE06-6.2-A11R	20	drilling	XXVII	A9	0.123	9.214	0.993694	2.761	0.028	1.897	0.085	3	2002
Iceland	ICE06-6.2-A11R	21	drilling	XXVII	A10	0.442	9.656	0.0861145	2.411	0.016	2.528	0.082	4	2003
Iceland	ICE06-6.2-A11R	22	drilling	XXVII	A11	0.577	10.233	0.204986	2.374	0.026	2.526	0.064	4	2003
Iceland	ICE06-6.2-A11R	23	drilling	XXVII	A12	0.347	10.58	0.276473	2.61	0.04	2.436	0.061	4	2003
Iceland	ICE06-6.2-A11R	24	drilling	XXVII	A13	0.271	10.851	0.332303	2.792	0.035	2.385	0.058	4	2003
Iceland	ICE06-6.2-A11R	25	drilling	XXVII	A14	0.278	11.129	0.389576	2.659	0.035	2.366	0.064	4	2003
Iceland	ICE06-6.2-A11R	26	drilling	XXVII	A15	0.394	11.523	0.470746	3.168	0.038	1.987	0.082	4	2003
Iceland	ICE06-6.2-A11R	27	drilling	XXVII	B1	0.316	11.839	0.535847	3.09	0.025	2.214	0.07	4	2003
Iceland	ICE06-6.2-A11R	28	drilling	XXVII	B2	0.299	12.138	0.597445	2.8	0.015	2.214	0.069	4	2003
Iceland	ICE06-6.2-A11R	29	drilling	XXVII	B3	0.362	12.5	0.672023	2.908	0.04	1.727	0.061	4	2003
Iceland	ICE06-6.2-A11R	30	drilling	XXVII	B4	0.236	12.736	0.720643	3.016	0.036	1.71	0.082	4	2003
Iceland	ICE06-6.2-A11R	31	drilling	XXVII	B5	0.272	13.008	0.776679	2.833	0.027	1.453	0.062	4	2003
Iceland	ICE06-6.2-A11R	32	drilling	XXVII	B6	0.344	13.352	0.847548	2.843	0.016	1.552	0.079	4	2003
Iceland	ICE06-6.2-A11R	33	drilling	XXVII	B7	0.253	13.605	0.89967	2.812	0.017	1.351	0.052	4	2003
Iceland	ICE06-6.2-A11R	34	drilling	XXVII	B8	0.206	13.811	0.94211	2.719	0.028	1.553	0.075	4	2003
Iceland	ICE06-6.2-A11R	35	drilling	XXVII	B9	0.332	14.143	0.0264386	2.684	0.012	2.645	0.065	5	2004
Iceland	ICE06-6.2-A11R	36	drilling	XXVII	B10	0.391	14.534	0.229134	2.78	0.027	2.322	0.075	5	2004
Iceland	ICE06-6.2-A11R	37	drilling	XXVII	B11	0.286	14.82	0.377398	2.908	0.026	2.409	0.05	5	2004
Iceland	ICE06-6.2-A11R	38	drilling	XXVII	B12	0.475	15.295	0.623639	3.429	0.051	1.987	0.064	5	2004
Iceland	ICE06-6.2-A11R	39	drilling	XXVII	B13	0.316	15.611	0.787455	2.994	0.036	1.751	0.066	5	2004
Iceland	ICE06-6.2-A11R	40	drilling	XXVII	B14	0.559	16.17	0.0461729	2.676	0.032	2.067	0.088	6	2005
Iceland	ICE06-6.2-A11R	41	drilling	XXVII	B15	0.52	16.69	0.207313	3.296	0.014	2.263	0.093	6	2005
Iceland	ICE06-6.2-A11R	42	drilling	XXVII	C1	0.319	17.009	0.306167	3.28	0.024	2.456	0.063	6	2005
Iceland	ICE06-6.2-A11R	43	drilling	XXVII	C2	0.384	17.393	0.425163	3.364	0.028	1.82	0.08	6	2005
Iceland	ICE06-6.2-A11R	44	drilling	XXVII	C3	0.305	17.698	0.519678	3.409	0.057	1.841	0.074	6	2005
Iceland	ICE06-6.2-A11R	45	drilling	XXVII	C4	0.33	18.028	0.62194	3.468	0.025	1.331	0.064	6	2005
Iceland	ICE06-6.2-A11R	46	drilling	XXVII	C5	0.305	18.333	0.716455	3.369	0.023	1.324	0.059	6	2005
Iceland	ICE06-6.2-A11R	47	drilling	XXVII	C6	0.342	18.675	0.822436	3.121	0.023	1.331	0.072	6	2005
Iceland	ICE06-6.2-A11R	48	drilling	XXVII	C7	0.386	19.061	0.942051	2.834	0.028	1.729	0.077	6	2005
Iceland	ICE06-6.2-A11R	49	drilling	XXVII	C8	0.335	19.396		2.958	0.035	2.609	0.084	7	2006
Iceland	ICE06-6.2-A11R	50	drilling	XXVII	C9	0.439	19.835		3.246	0.02	2.08	0.08	7	2006
Iceland	ICE06-6.2-A11R	51	drilling	XXVII	C10	0.414	20.249		3.222	0.028	1.854	0.061	7	2006
Iceland	ICE06-6.2-A11R	52	drilling	XXVII	C11	0.502	20.751		3.253	0.015	1.82	0.074	7	2006
Iceland	ICE06-6.2-A16R	1	drilling	III	A15				1.977	0.023	2.995	0.038				Ontogenetic Age	Calendar Year	Increment width (mm)	Starting growth line at (mm)
Iceland	ICE06-6.2-A16R	2	drilling	III	A14				2.688	0.023	1.835	0.057				3	1996		5.485
Iceland	ICE06-6.2-A16R	3	drilling	III	A13	0.662	0.662		3.071	0.027	2.342	0.05				4	1997	2.003	7.488
Iceland	ICE06-6.2-A16R	4	drilling	III	A12	0.776	1.438		2.981	0.04	2.391	0.089				5	1998	4.015	11.503
Iceland	ICE06-6.2-A16R	5	drilling	III	A11	0.783	2.221		2.789	0.014	2.465	0.073	3	1996		6	1999	2.846	14.349
Iceland	ICE06-6.2-A16R	6	drilling	III	A10	0.721	2.942		3.015	0.041	2.447	0.045	3	1996		7	2000	3.024	17.373
Iceland	ICE06-6.2-A16R	7	drilling	III	A9	0.709	3.651		3.244	0.045	2.227	0.075	3	1996		8	2001	1.847	19.22
Iceland	ICE06-6.2-A16R	8	drilling	III	A8	0.384	4.035		3.361	0.022	2.173	0.041	3	1996		9	2002	1.58	20.8
Iceland	ICE06-6.2-A16R	9	drilling	III	A7	0.318	4.353		3.348	0.025	1.824	0.054	3	1996		10	2003	1.644	22.444
Iceland	ICE06-6.2-A16R	10	drilling	III	A6	0.308	4.661		3.074	0.028	2.016	0.077	3	1996		11	2004	1.111	23.555
Iceland	ICE06-6.2-A16R	11	drilling	III	A5	0.534	5.195		2.981	0.024	1.881	0.043	3	1996		12	2005	1.645	25.2
Iceland	ICE06-6.2-A16R	12	drilling	III	A4	0.428	5.623	0.0688967	2.392	0.017	3.255	0.045	4	1997		13	2006
Iceland	ICE06-6.2-A16R	13	drilling	III	A3	0.526	6.149	0.331503	3.077	0.027	2.866	0.057	4	1997
Iceland	ICE06-6.2-A16R	14	drilling	III	A2	0.381	6.53	0.521717	3.147	0.042	2.707	0.055	4	1997
Iceland	ICE06-6.2-A16R	15	drilling	III	A1	0.413	6.943	0.727908	2.957	0.029	2.426	0.031	4	1997
Iceland	ICE06-6.2-A16R	16	drilling	LIII	D15	0.545	7.488	1	2.369	0.029	2.635	0.048	4	1997
Iceland	ICE06-6.2-A16R	17	drilling	LIII	D14	0.532	8.02	0.132503	2.385	0.022	2.784	0.077	5	1998
Iceland	ICE06-6.2-A16R	18	drilling	LIII	D13	0.357	8.377	0.22142	3.227	0.033	2.837	0.04	5	1998
Iceland	ICE06-6.2-A16R	19	drilling	LIII	D12	0.468	8.845	0.337983	3.136	0.029	2.455	0.056	5	1998
Iceland	ICE06-6.2-A16R	20	drilling	LIII	D11	0.507	9.352	0.464259	3.097	0.022	2.079	0.06	5	1998
Iceland	ICE06-6.2-A16R	21	drilling	LIII	D10	0.515	9.867	0.592528	3.152	0.02	2.223	0.076	5	1998
Iceland	ICE06-6.2-A16R	22	drilling	LIII	D9	0.582	10.449	0.737484	3.167	0.021	2.113	0.066	5	1998
Iceland	ICE06-6.2-A16R	23	drilling	LIII	D8	0.288	10.737	0.809215	3.106	0.018	2.005	0.065	5	1998
Iceland	ICE06-6.2-A16R	24	drilling	LIII	D7	0.328	11.065	0.890909	2.843	0.03	2.219	0.03	5	1998
Iceland	ICE06-6.2-A16R	25	drilling	LIII	D6	0.329	11.394	0.972852	2.511	0.025	2.468	0.083	5	1998
Iceland	ICE06-6.2-A16R	26	drilling	LIII	D5	0.362	11.756	0.0888967	2.569	0.02	3.053	0.047	6	1999
Iceland	ICE06-6.2-A16R	27	drilling	LIII	D4	0.288	12.044	0.190091	3.036	0.036	2.542	0.065	6	1999
Iceland	ICE06-6.2-A16R	28	drilling	LIII	D3	0.248	12.292	0.277231	3.029	0.031	2.271	0.03	6	1999
Iceland	ICE06-6.2-A16R	29	drilling	LIII	D2	0.388	12.68	0.413563	2.868	0.02	2.161	0.063	6	1999
Iceland	ICE06-6.2-A16R	30	drilling	LIII	D1	0.287	12.967	0.514406	3.19	0.03	1.903	0.053	6	1999
Iceland	ICE06-6.2-A16R	31	drilling	LIII	C15	0.199	13.166	0.584329	3.161	0.022	1.606	0.042	6	1999
Iceland	ICE06-6.2-A16R	32	drilling	LIII	C14	0.19	13.356	0.651089	3.148	0.022	1.466	0.053	6	1999
Iceland	ICE06-6.2-A16R	33	drilling	LIII	C13	0.285	13.641	0.75123	3.004	0.04	1.536	0.051	6	1999
Iceland	ICE06-6.2-A16R	34	drilling	LIII	C12	0.311	13.952	0.860506	2.902	0.03	1.573	0.044	6	1999
Iceland	ICE06-6.2-A16R	35	drilling	LIII	C11	0.294	14.246	0.963809	2.711	0.016	1.975	0.036	6	1999
Iceland	ICE06-6.2-A16R	36	drilling	LIII	C10	0.449	14.695	0.114418	2.828	0.041	2.801	0.058	7	2000
Iceland	ICE06-6.2-A16R	37	drilling	LIII	C9	0.238	14.933	0.193122	3.095	0.037	2.664	0.054	7	2000
Iceland	ICE06-6.2-A16R	38	drilling	LIII	C8	0.324	15.257	0.300265	3.087	0.024	2.424	0.059	7	2000
Iceland	ICE06-6.2-A16R	39	drilling	LIII	C7	0.338	15.595	0.412037	3.271	0.021	2.48	0.052	7	2000
Iceland	ICE06-6.2-A16R	40	drilling	LIII	C6	0.388	15.983	0.540344	3.267	0.013	1.902	0.057	7	2000
Iceland	ICE06-6.2-A16R	41	drilling	LIII	C5	0.286	16.269	0.634921	3.215	0.024	1.337	0.064	7	2000
Iceland	ICE06-6.2-A16R	42	drilling	LIII	C4	0.263	16.532	0.721892	3.255	0.026	1.549	0.057	7	2000
Iceland	ICE06-6.2-A16R	43	drilling	LIII	C3	0.243	16.775	0.802249	3.203	0.026	1.518	0.036	7	2000
Iceland	ICE06-6.2-A16R	44	drilling	LIII	C2	0.138	16.913	0.847884	3.102	0.02	1.584	0.044	7	2000
Iceland	ICE06-6.2-A16R	45	drilling	LIII	C1	0.364	17.277	0.968254	2.691	0.032	2.032	0.064	7	2000
Iceland	ICE06-6.2-A16R	46	drilling	LIII	B15	0.275	17.552	0.0969139	2.247	0.032	3.034	0.064	8	2001
Iceland	ICE06-6.2-A16R	47	drilling	LIII	B14	0.282	17.834	0.249594	2.773	0.046	2.666	0.081	8	2001
Iceland	ICE06-6.2-A16R	48	drilling	LIII	B13	0.225	18.059	0.371413	3.071	0.033	2.614	0.083	8	2001
Iceland	ICE06-6.2-A16R	49	drilling	LIII	B12	0.285	18.344	0.525717	3.093	0.022	2.119	0.058	8	2001
Iceland	ICE06-6.2-A16R	50	drilling	LIII	B11	0.4	18.744	0.742285	3.256	0.029	1.996	0.079	8	2001
Iceland	ICE06-6.2-A16R	51	drilling	LIII	B10	0.074	18.818	0.78235	3.297	0.032	2.037	0.045	8	2001
Iceland	ICE06-6.2-A16R	52	drilling	LIII	B9	0.14	18.958	0.858148	2.921	0.023	2.06	0.078	8	2001
Iceland	ICE06-6.2-A16R	53	drilling	LIII	B8	0.413	19.371	0.0955696	2.507	0.041	3.045	0.057	9	2002
Iceland	ICE06-6.2-A16R	54	drilling	LIII	B7	0.378	19.749	0.33481	3.256	0.025	2.712	0.065	9	2002
Iceland	ICE06-6.2-A16R	55	drilling	LIII	B6	0.074	19.823	0.381646	3.076	0.032	2.534	0.047	9	2002
Iceland	ICE06-6.2-A16R	56	drilling	LIII	B5	0.297	20.12	0.56962	3.114	0.035	2.17	0.041	9	2002
Iceland	ICE06-6.2-A16R	57	drilling	LIII	B4	0.257	20.377	0.732278	2.719	0.026	1.783	0.051	9	2002
Iceland	ICE06-6.2-A16R	58	drilling	LIII	B3	0.217	20.594	0.86962	2.332	0.03	2.074	0.068	9	2002
Iceland	ICE06-6.2-A16R	59	drilling	LIII	B2	0.37	20.964	0.0997567	1.852	0.021	2.912	0.061	10	2003
Iceland	ICE06-6.2-A16R	60	drilling	LIII	B1	0.254	21.218	0.254258	1.844	0.018	2.857	0.036	10	2003
Iceland	ICE06-6.2-A16R	61	drilling	LIII	A15	0.351	21.569	0.467762	2.063	0.016	2.166	0.056	10	2003
Iceland	ICE06-6.2-A16R	62	drilling	LIII	A14	0.466	22.035	0.751217	2.15	0.037	2.192	0.069	10	2003
Iceland	ICE06-6.2-A16R	63	drilling	LIII	A13	0.924	22.959	0.463546	2.815	0.016	2.485	0.05	11	2004
Iceland	ICE06-6.2-A16R	64	drilling	LIII	A12	0.297	23.256	0.730873	2.673	0.027	2.049	0.068	11	2004
Iceland	ICE06-6.2-A16R	65	drilling	LIII	A11	0.299	23.555	1	2.362	0.015	2.536	0.061	11	2004
Iceland	ICE06-6.2-A16R	66	drilling	LIII	A10	0.238	23.793	0.144681	2.224	0.036	3.026	0.063	12	2005
Iceland	ICE06-6.2-A16R	67	drilling	LIII	A9	0.226	24.019	0.282067	2.485	0.055	2.498	0.095	12	2005
Iceland	ICE06-6.2-A16R	68	drilling	LIII	A8	0.315	24.334	0.473556	2.797	0.018	2.219	0.054	12	2005
Iceland	ICE06-6.2-A16R	69	drilling	LIII	A7	0.502	24.836	0.778723	2.825	0.018	1.938	0.053	12	2005
Iceland	ICE06-6.2-A16R	70	drilling	LIII	A6	0.189	25.025	0.893617	2.636	0.037	1.971	0.056	12	2005
Iceland	ICE06-6.2-A16R	71	drilling	LIII	A5	0.127	25.152	0.970821	1.944	0.028	2.314	0.052	12	2005
Iceland	ICE06-6.2-A16R	72	drilling	LIII	A4	0.285	25.437		2.13	0.01	3.127	0.059	13	2006
Iceland	ICE06-6.2-A16R	73	drilling	LIII	A3	0.244	25.681		2.696	0.008	2.68	0.062	13	2006
Iceland	ICE06-6.2-A16R	74	drilling	LIII	A2	0.235	25.916		2.668	0.033	2.15	0.044	13	2006
Iceland	ICE06-6.2-A16R	75	drilling	LIII	A1	0.305	26.221		2.827	0.038	1.921	0.079	13	2006
Iceland	ICE06-6.2-A6R	1	drilling	III	B1	4.285	4.285	0.954834	2.456	0.026	2.337	0.062	2	1995		Ontogenetic Age	Calendar Year	Increment width (mm)	Starting growth line at (mm)
Iceland	ICE06-6.2-A6R	2	drilling	III	B2	0.176	4.461	0.0800269	2.442	0.044	3.106	0.085	3	1996		1	1994		3.08
Iceland	ICE06-6.2-A6R	3	drilling	III	B3	0.233	4.694	0.236718	2.765	0.035	2.792	0.065	3	1996		2	1995	1.262	4.342
Iceland	ICE06-6.2-A6R	4	drilling	III	B4	0.218	4.912	0.383322	3.119	0.028	2.317	0.037	3	1996		3	1996	1.487	5.829
Iceland	ICE06-6.2-A6R	5	drilling	III	B5	0.229	5.141	0.537323	3.152	0.023	2.079	0.048	3	1996		4	1997	1.698	7.527
Iceland	ICE06-6.2-A6R	6	drilling	III	B6	0.215	5.356	0.68191	2.851	0.024	1.787	0.043	3	1996		5	1998	1.942	9.469
Iceland	ICE06-6.2-A6R	7	drilling	III	B7	0.212	5.568	0.824479	2.702	0.015	1.774	0.037	3	1996		6	1999	1.289	10.758
Iceland	ICE06-6.2-A6R	8	drilling	III	B8	0.11	5.678	0.898453	2.946	0.028	1.625	0.071	3	1996		7	2000	1.304	12.062
Iceland	ICE06-6.2-A6R	9	drilling	III	B9	0.121	5.799	0.979825	2.711	0.031	2.219	0.041	3	1996		8	2001	0.667	12.729
Iceland	ICE06-6.2-A6R	10	drilling	III	B10	0.324	6.123	0.173145	3.103	0.037	2.528	0.054	4	1997		9	2002	1.045	13.774
Iceland	ICE06-6.2-A6R	11	drilling	III	B11	0.181	6.304	0.279741	3.116	0.032	2.376	0.109	4	1997		10	2003	0.931	14.705
Iceland	ICE06-6.2-A6R	12	drilling	III	B12	0.206	6.51	0.40106	2.949	0.03	2.244	0.052	4	1997		11	2004	0.534	15.239
Iceland	ICE06-6.2-A6R	13	drilling	III	B13	0.227	6.737	0.534747	3.046	0.014	1.933	0.07	4	1997		12	2005	0.556	15.795
Iceland	ICE06-6.2-A6R	14	drilling	III	B14	0.188	6.925	0.645465	2.936	0.007	2.004	0.041	4	1997		13	2006
Iceland	ICE06-6.2-A6R	15	drilling	III	B15	0.326	7.251	0.837456	2.834	0.028	1.978	0.074	4	1997
Iceland	ICE06-6.2-A6R	16	drilling	III	C1	0.223	7.474	0.968787	2.684	0.024	2.174	0.042	4	1997
Iceland	ICE06-6.2-A6R	17	drilling	III	C2	0.228	7.702	0.0901133	2.879	0.025	3.159	0.063	5	1998
Iceland	ICE06-6.2-A6R	18	drilling	III	C3	0.242	7.944	0.214727	3.421	0.017	2.615	0.057	5	1998
Iceland	ICE06-6.2-A6R	19	drilling	III	C4	0.199	8.143	0.317199	3.428	0.03	2.294	0.07	5	1998
Iceland	ICE06-6.2-A6R	20	drilling	III	C5	0.197	8.34	0.418641	3.425	0.035	2.235	0.081	5	1998
Iceland	ICE06-6.2-A6R	21	drilling	III	C6	0.153	8.493	0.497425	3.383	0.033	2.345	0.048	5	1998
Iceland	ICE06-6.2-A6R	22	drilling	III	C7	0.219	8.712	0.610196	3.448	0.036	2.18	0.059	5	1998
Iceland	ICE06-6.2-A6R	23	drilling	III	C8	0.164	8.876	0.694645	3.301	0.039	2.106	0.069	5	1998
Iceland	ICE06-6.2-A6R	24	drilling	III	C9	0.091	8.967	0.741504	3.322	0.045	2.055	0.032	5	1998
Iceland	ICE06-6.2-A6R	25	drilling	III	C10	0.234	9.201	0.861998	2.811	0.021	2.086	0.031	5	1998
Iceland	ICE06-6.2-A6R	26	drilling	III	C11	0.119	9.32	0.923275	2.618	0.028	2.16	0.07	5	1998
Iceland	ICE06-6.2-A6R	27	drilling	III	C12	0.118	9.438	0.984037	2.617	0.011	2.449	0.036	5	1998
Iceland	ICE06-6.2-A6R	28	drilling	III	C13	0.152	9.59	0.0938712	2.905	0.013	3.128	0.072	6	1999
Iceland	ICE06-6.2-A6R	29	drilling	III	C14	0.183	9.773	0.235842	3.086	0.035	2.266	0.05	6	1999
Iceland	ICE06-6.2-A6R	30	drilling	III	C15	0.173	9.946	0.370054	3.136	0.025	2.058	0.059	6	1999
Iceland	ICE06-6.2-A6R	31	drilling	III	D1	0.135	10.081	0.474787	3.205	0.031	1.445	0.099	6	1999
Iceland	ICE06-6.2-A6R	32	drilling	III	D2	0.112	10.193	0.561676	3.215	0.02	1.33	0.052	6	1999
Iceland	ICE06-6.2-A6R	33	drilling	III	D3	0.119	10.312	0.653995	2.971	0.058	1.384	0.068	6	1999
Iceland	ICE06-6.2-A6R	34	drilling	III	D4	0.073	10.385	0.710628	3.023	0.036	1.518	0.088	6	1999
Iceland	ICE06-6.2-A6R	35	drilling	III	D5	0.109	10.494	0.79519	2.947	0.017	1.406	0.067	6	1999
Iceland	ICE06-6.2-A6R	36	drilling	III	D6	0.114	10.608	0.883631	2.795	0.041	1.652	0.043	6	1999
Iceland	ICE06-6.2-A6R	37	drilling	III	D7	0.149	10.757	0.999224	2.736	0.024	2.423	0.049	6	1999
Iceland	ICE06-6.2-A6R	38	drilling	III	D8	0.205	10.962	0.156442	3.08	0.025	2.712	0.099	7	2000
Iceland	ICE06-6.2-A6R	39	drilling	III	D9	0.18	11.142	0.294479	3.43	0.031	2.147	0.066	7	2000
Iceland	ICE06-6.2-A6R	40	drilling	III	D10	0.15	11.292	0.409509	3.383	0.024	1.902	0.043	7	2000
Iceland	ICE06-6.2-A6R	41	drilling	III	D11	0.083	11.375	0.47316	3.376	0.023	1.293	0.064	7	2000
Iceland	ICE06-6.2-A6R	42	drilling	III	D12	0.102	11.477	0.55138	3.271	0.032	0.947	0.069	7	2000
Iceland	ICE06-6.2-A6R	43	drilling	III	D13	0.108	11.585	0.634202	3.311	0.029	1.227	0.042	7	2000
Iceland	ICE06-6.2-A6R	44	drilling	III	D14	0.155	11.74	0.753067	3.06	0.032	1.253	0.048	7	2000
Iceland	ICE06-6.2-A6R	45	drilling	III	D15	0.136	11.876	0.857362	2.823	0.016	1.798	0.027	7	2000
Iceland	ICE06-6.2-A6R	46	drilling	XIII	A1	0.105	11.981	0.937883	3.126	0.037	2.719	0.048	7	2000
Iceland	ICE06-6.2-A6R	47	drilling	XIII	A2	0.154	12.135	0.109445	3.448	0.024	2.35	0.043	8	2001
Iceland	ICE06-6.2-A6R	48	drilling	XIII	A3	0.122	12.257	0.292354	3.604	0.012	2.054	0.065	8	2001
Iceland	ICE06-6.2-A6R	49	drilling	XIII	A4	0.132	12.389	0.490255	3.36	0.022	2.14	0.061	8	2001
Iceland	ICE06-6.2-A6R	50	drilling	XIII	A5	0.146	12.535	0.709145	2.878	0.013	2.278	0.076	8	2001
Iceland	ICE06-6.2-A6R	51	drilling	XIII	A6	0.174	12.709	0.970015	3.276	0.021	2.976	0.051	8	2001
Iceland	ICE06-6.2-A6R	52	drilling	XIII	A7	0.184	12.893	0.156938	3.41	0.022	2.566	0.033	9	2002
Iceland	ICE06-6.2-A6R	53	drilling	XIII	A8	0.146	13.039	0.296651	3.36	0.045	2.505	0.054	9	2002
Iceland	ICE06-6.2-A6R	54	drilling	XIII	A9	0.174	13.213	0.463158	3.247	0.023	1.749	0.051	9	2002
Iceland	ICE06-6.2-A6R	55	drilling	XIII	A10	0.182	13.395	0.637321	3.145	0.031	1.79	0.079	9	2002
Iceland	ICE06-6.2-A6R	56	drilling	XIII	A11	0.17	13.565	0.8	2.923	0.027	1.887	0.052	9	2002
Iceland	ICE06-6.2-A6R	57	drilling	XIII	A12	0.112	13.677	0.907177	2.263	0.029	2.4	0.051	9	2002
Iceland	ICE06-6.2-A6R	58	drilling	XIII	A13	0.139	13.816	0.0451128	2.548	0.032	2.424	0.053	10	2003
Iceland	ICE06-6.2-A6R	59	drilling	XIII	A14	0.144	13.96	0.199785	2.474	0.05	2.128	0.058	10	2003
Iceland	ICE06-6.2-A6R	60	drilling	XIII	A15	0.178	14.138	0.390977	3.033	0.052	1.84	0.059	10	2003
Iceland	ICE06-6.2-A6R	61	drilling	XIII	B1	0.18	14.318	0.584318	2.673	0.033	1.875	0.082	10	2003
Iceland	ICE06-6.2-A6R	62	drilling	XIII	B2	0.178	14.496	0.77551	2.487	0.032	1.462	0.07	10	2003
Iceland	ICE06-6.2-A6R	63	drilling	XIII	B3	0.097	14.593	0.879699	2.162	0.026	2.147	0.074	10	2003
Iceland	ICE06-6.2-A6R	64	drilling	XIII	B4	0.106	14.699	-0.011236	2.39	0.037	2.52	0.091	11	2004
Iceland	ICE06-6.2-A6R	65	drilling	XIII	B5	0.156	14.855	0.280899	2.751	0.026	1.867	0.067	11	2004
Iceland	ICE06-6.2-A6R	66	drilling	XIII	B6	0.131	14.986	0.526217	2.131	0.022	1.533	0.039	11	2004
Iceland	ICE06-6.2-A6R	67	drilling	XIII	B7	0.173	15.159	0.850187	2.458	0.024	1.955	0.068	11	2004
Iceland	ICE06-6.2-A6R	68	drilling	XIII	B8	0.149	15.308	0.124101	2.466	0.039	1.886	0.056	12	2005
Iceland	ICE06-6.2-A6R	69	drilling	XIII	B9	0.127	15.435	0.352518	2.579	0.062	1.357	0.079	12	2005
Iceland	ICE06-6.2-A6R	70	drilling	XIII	B10	0.116	15.551	0.561151	2.919	0.04	1.44	0.06	12	2005
Iceland	ICE06-6.2-A6R	71	drilling	XIII	B11	0.118	15.669	0.773381	2.388	0.012	1.76	0.05	12	2005
Iceland	ICE06-6.2-A6R	72	drilling	XIII	B12	0.01	15.679	0.791367	2.205	0.024	2.183	0.054	12	2005
Iceland	ICE06-6.2-A6R	73	drilling	XIII	B13				2.407	0.015	2.423	0.089	13	2006
Iceland	ICE06-6.2-A6R	74	drilling	XIII	B14				2.62	0.03	1.926	0.056	13	2006
Iceland	ICE06-6.2-A6R	75	drilling	XIII	B15				2.648	0.019	1.653	0.061	13	2006

## Sheet: NE Iceland calculation
d18O(s, pred)			d18O(w)	0.1			date	WH241-572-RA6-A1R		2.86384		shallow?	M071868-A3R		yr x1	yr x2		shell			139.589	26926			ann incr%	time%									date	daily growth%	daily growth%	cumul growth%		shallow?	105.278	31985.5			ann incr%	time%
arbitrary date	SST	d18O(s)reco		arbitrary date	interpolated d18O(s)		26.5m	incr width (mm)	%growth of annual incr	cumul%		distance from hinge (mm)	sample#	d13C	Date			d18O	Yr (AD)		date	distance	milling width	cumulative milling	s%	t%	#days	Date	d18O	%ann incr/d		Date	%ann incr/d			interpolated	cumul	normalized			date	distance	milling width	cumulative milling	s%	t%	#days	Date	d18O
2020-07-15	5.75904	3.24958		2020-07-16	3.24074		2020-10-15					26210.2	75	2.74637	2020-07-12			2.90097			2020-10-01 01:54:37	27065.5	139.589	0	0	0	0	2020-10-01 01:54:37	3.00049	0.031002		2020-10-01 01:54:37	0.031002		2020-10-15	0.0377491	0.0377491	0.0351349			2020-09-25	32090.7	105.278	0	0	0	0	2020-09-25	2.96228
2020-08-15	6.9478	2.97567		2020-07-17	3.2319		2020-10-16					26495.3	76	2.54683	2020-08-15			2.80669			2020-12-29 16:18:37	27205.1	139.589	139.589	2.77778	24.9638	89.6	2020-12-29 16:18:37	3.45111	0.0744305		2020-12-29 16:18:37	0.0744305		2020-10-16	0.0382338	0.0759829	0.0707208			2020-11-21	32196	105.278	105.278	2.22222	15.4054	57	2020-11-21	3.308
2020-09-15	5.6598	3.27244		2020-07-18	3.22307		2020-10-17					26780.4	77	2.4556	2020-09-19 04:18:37			2.91405			2021-02-05	27344.7	139.589	279.178	5.55556	35.3617	126.92	2021-02-05	3.33382	0.115741		2021-02-05	0.115741		2020-10-17	0.0387185	0.114701	0.106758			2021-02-20	32301.3	105.278	210.556	4.44444	40	148	2021-02-20	3.52155
2020-10-15	3.58018	3.75162		2020-07-19	3.21423		2020-10-18					27065.5	78	2.14617	2020-10-01 01:54:37			3.00049	1500		2021-03-01	27484.3	139.589	418.767	8.33333	42.0484	150.92	2021-03-01	3.40242	0.0957854		2021-03-01	0.0957854		2020-10-18	0.0392032	0.153905	0.143246			2021-03-20	32406.6	105.278	315.834	6.66667	47.5676	176	2021-03-20	3.46664
2020-11-15	2.09823	4.09308		2020-07-20	3.2054		2020-10-19					27205.1	79	2.38718	2020-12-29 16:18:37			3.45111	1500		2021-03-30	27623.9	139.589	558.355	11.1111	50.1282	179.92	2021-03-30	3.44245	0.0896057		2021-03-30	0.0896057		2020-10-19	0.0396879	0.193593	0.180186			2021-04-10	32511.9	105.278	421.112	8.88889	53.2432	197	2021-04-10	3.45464
2020-12-15	1.66476	4.19296		2020-07-21	3.19656		2020-10-20					27344.7	80	2.58403	2021-02-05			3.33382			2021-04-30	27763.5	139.589	697.944	13.8889	58.7652	210.92	2021-04-30	3.3886	0.154321		2021-04-30	0.154321		2020-10-20	0.0401726	0.233765	0.217576			2021-05-10	32617.1	105.278	526.39	11.1111	61.3514	227	2021-05-10	3.3987
2021-01-15	1.213	4.29705		2020-07-22	3.18773		2020-10-21					27484.3	81	2.67548	2021-03-01			3.40242			2021-05-18	27903.1	139.589	837.533	16.6667	63.7803	228.92	2021-05-18	3.27594	0.694444		2021-05-18	0.694444		2020-10-21	0.0406573	0.274422	0.255418			2021-05-20	32722.4	105.278	631.668	13.3333	64.0541	237	2021-05-20	3.34656
2021-02-15	0.75877	4.40171		2020-07-23	3.17889		2020-10-22					27623.9	82	2.72917	2021-03-30			3.44245			2021-05-22	28042.7	139.589	977.122	19.4444	64.8947	232.92	2021-05-22	3.26985	0.694444		2021-05-22	0.694444		2020-10-22	0.041142	0.315564	0.29371			2021-05-23	32827.7	105.278	736.946	15.5556	64.8649	240	2021-05-23	3.22799
2021-03-15	0.619443	4.43382		2020-07-24	3.17005		2020-10-23					27763.5	83	2.78666	2021-04-30			3.3886			2021-05-26	28182.3	139.589	1116.71	22.2222	66.0092	236.92	2021-05-26	3.2369	0.694444		2021-05-26	0.694444		2020-10-23	0.0416267	0.357191	0.332454			2021-05-26	32933	105.278	842.224	17.7778	65.6757	243	2021-05-26	3.35118
2021-04-15	0.758784	4.40171		2020-07-25	3.16122		2020-10-24					27903.1	84	2.72435	2021-05-18			3.27594			2021-05-30	28321.8	139.589	1256.3	25	67.1236	240.92	2021-05-30	3.08433	0.694444		2021-05-30	0.694444		2020-10-24	0.0421114	0.399302	0.371649			2021-06-03	33038.2	105.278	947.502	20	67.8378	251	2021-06-03	3.21929
2021-05-15	1.76909	4.16892		2020-07-26	3.15238		2020-10-25					28042.7	85	2.79939	2021-05-22			3.26985			2021-06-03	28461.4	139.589	1395.89	27.7778	68.2381	244.92	2021-06-03	3.18707	0.694444		2021-06-03	0.694444		2020-10-25	0.0425961	0.441898	0.411295			2021-06-06	33143.5	105.278	1052.78	22.2222	68.6486	254	2021-06-06	3.15257
2021-06-15	3.70479	3.72291		2020-07-27	3.14355		2020-10-26					28182.3	86	2.85389	2021-05-26			3.2369			2021-06-07	28601	139.589	1535.48	30.5556	69.3525	248.92	2021-06-07	3.09582	0.694444		2021-06-07	0.694444		2020-10-26	0.0430807	0.484979	0.451393			2021-06-09	33248.8	105.278	1158.06	24.4444	69.4595	257	2021-06-09	3.13214
2021-07-15	5.75904	3.24958		2020-07-28	3.13471		2020-10-27					28321.8	87	2.88314	2021-05-30			3.08433			2021-06-11	28740.6	139.589	1675.07	33.3333	70.467	252.92	2021-06-11	3.23156	0.694444		2021-06-11	0.694444		2020-10-27	0.0435654	0.528545	0.491941			2021-06-11	33354.1	105.278	1263.34	26.6667	70	259	2021-06-11	3.14424
2021-08-15	6.9478	2.97567		2020-07-29	3.12588		2020-10-28					28461.4	88	2.85112	2021-06-03			3.18707			2021-06-15	28880.2	139.589	1814.65	36.1111	71.5814	256.92	2021-06-15	3.14303	0.694444		2021-06-15	0.694444		2020-10-28	0.0440501	0.572595	0.532941			2021-06-13	33459.4	105.278	1368.61	28.8889	70.5405	261	2021-06-13	3.20084
2021-09-15	5.6598	3.27244		2020-07-30	3.11704		2020-10-29					28601	89	2.87664	2021-06-07			3.09582			2021-06-19	29019.8	139.589	1954.24	38.8889	72.6959	260.92	2021-06-19	3.03345	0.694444		2021-06-19	0.694444		2020-10-29	0.0445348	0.61713	0.574391			2021-06-15	33564.6	105.278	1473.89	31.1111	71.0811	263	2021-06-15	3.10329
2021-10-15	3.58018	3.75162		2020-07-31	3.1082		2020-10-30					28740.6	90	2.93622	2021-06-11			3.23156			2021-06-23	29159.4	139.589	2093.83	41.6667	73.8103	264.92	2021-06-23	3.06511	0.694444		2021-06-23	0.694444		2020-10-30	0.0450195	0.662149	0.616293			2021-06-17	33669.9	105.278	1579.17	33.3333	71.6216	265	2021-06-17	3.04618
2021-11-15	2.09823	4.09308		2020-08-01	3.09937		2020-10-31					28880.2	91	2.95249	2021-06-15			3.14303			2021-06-27	29299	139.589	2233.42	44.4444	74.9248	268.92	2021-06-27	3.016	0.694444		2021-06-27	0.694444		2020-10-31	0.0455042	0.707653	0.658646			2021-06-19	33775.2	105.278	1684.45	35.5556	72.1622	267	2021-06-19	3.08553
2021-12-15	1.66476	4.19296		2020-08-02	3.09053		2020-11-01					29019.8	92	2.91438	2021-06-19			3.03345			2021-07-01	29438.6	139.589	2373.01	47.2222	76.0393	272.92	2021-07-01	2.99734	1.38889		2021-07-01	1.38889		2020-11-01	0.0459889	0.753642	0.70145			2021-06-21	33880.5	105.278	1789.73	37.7778	72.7027	269	2021-06-21	3.14318
2022-01-15	1.213	4.29705		2020-08-03	3.0817		2020-11-02					29159.4	93	2.81845	2021-06-23			3.06511			2021-07-03	29578.1	139.589	2512.6	50	76.5965	274.92	2021-07-03	3.00384	1.38889		2021-07-03	1.38889		2020-11-02	0.0464736	0.800116	0.744705			2021-06-23	33985.7	105.278	1895	40	73.2432	271	2021-06-23	3.14955
2022-02-15	0.75877	4.40171		2020-08-04	3.07286		2020-11-03					29299	94	2.81738	2021-06-27			3.016			2021-07-05	29717.7	139.589	2652.19	52.7778	77.1537	276.92	2021-07-05	2.9583	2.77778		2021-07-05	2.77778		2020-11-03	0.0469583	0.847074	0.788411			2021-06-25	34091	105.278	2000.28	42.2222	73.7838	273	2021-06-25	2.87452
2022-03-15	0.619443	4.43382		2020-08-05	3.06403		2020-11-04					29438.6	95	2.87474	2021-07-01			2.99734			2021-07-06	29857.3	139.589	2791.78	55.5556	77.4323	277.92	2021-07-06	2.9848	2.77778		2021-07-06	2.77778		2020-11-04	0.047443	0.894517	0.832569			2021-06-27	34196.3	105.278	2105.56	44.4444	74.3243	275	2021-06-27	3.06867
2022-04-15	0.758784	4.40171		2020-08-06	3.05519		2020-11-05					29578.1	96	2.88818	2021-07-03			3.00384			2021-07-07	29996.9	139.589	2931.37	58.3333	77.7109	278.92	2021-07-07	3.02545	2.77778		2021-07-07	2.77778		2020-11-05	0.0479277	0.942445	0.877177			2021-06-29	34301.6	105.278	2210.84	46.6667	74.8649	277	2021-06-29	2.85683
2022-05-15	1.76909	4.16892		2020-08-07	3.04635		2020-11-06					29717.7	97	2.87205	2021-07-05			2.9583			2021-07-08	30136.5	139.589	3070.95	61.1111	77.9895	279.92	2021-07-08	2.98321	2.77778		2021-07-08	2.77778		2020-11-06	0.0484124	0.990857	0.922237			2021-06-30	34406.9	105.278	2316.12	48.8889	75.1351	278	2021-06-30	2.97611
2022-06-15	3.70479	3.72291		2020-08-08	3.03752		2020-11-07					29857.3	98	2.89616	2021-07-06			2.9848			2021-07-09	30276.1	139.589	3210.54	63.8889	78.2682	280.92	2021-07-09	2.9439	2.77778		2021-07-09	2.77778		2020-11-07	0.0488971	1.03975	0.967748			2021-07-01	34512.1	105.278	2421.39	51.1111	75.4054	279	2021-07-01	2.84608
2022-07-15	5.75904	3.24958		2020-08-09	3.02868		2020-11-08					29996.9	99	2.92038	2021-07-07			3.02545			2021-07-10	30415.7	139.589	3350.13	66.6667	78.5468	281.92	2021-07-10	2.98746	2.77778		2021-07-10	2.77778		2020-11-08	0.0493818	1.08914	1.01371			2021-07-02	34617.4	105.278	2526.67	53.3333	75.6757	280	2021-07-02	3.12099
2022-08-15	6.9478	2.97567		2020-08-10	3.01985		2020-11-09					30136.5	100	2.92386	2021-07-08			2.98321			2021-07-11	30555.3	139.589	3489.72	69.4444	78.8254	282.92	2021-07-11	3.0228	2.77778		2021-07-11	2.77778		2020-11-09	0.0498665	1.139	1.06012			2021-07-03	34722.7	105.278	2631.95	55.5556	75.9459	281	2021-07-03	2.98912
2022-09-15	5.6598	3.27244		2020-08-11	3.01101		2020-11-10					30276.1	101	2.9547	2021-07-09			2.9439			2021-07-12	30694.9	139.589	3629.31	72.2222	79.104	283.92	2021-07-12	2.90057	2.77778		2021-07-12	2.77778		2020-11-10	0.0503512	1.18935	1.10699			2021-07-04	34828	105.278	2737.23	57.7778	76.2162	282	2021-07-04	3.02409
2022-10-15	3.58018	3.75162		2020-08-12	3.00218		2020-11-11					30415.7	102	2.99622	2021-07-10			2.98746			2021-07-13	30834.4	139.589	3768.9	75	79.3826	284.92	2021-07-13	2.88965	1.38889		2021-07-13	1.38889		2020-11-11	0.0508358	1.24019	1.1543			2021-07-05	34933.2	105.278	2842.51	60	76.4865	283	2021-07-05	3.04848
2022-11-15	2.09823	4.09308		2020-08-13	2.99334		2020-11-12					30555.3	103	2.99095	2021-07-11			3.0228			2021-07-15	30974	139.589	3908.49	77.7778	79.9398	286.92	2021-07-15	3.01842	1.38889		2021-07-15	1.38889		2020-11-12	0.0513205	1.29151	1.20207			2021-07-06	35038.5	105.278	2947.78	62.2222	76.7568	284	2021-07-06	2.98359
2022-12-15	1.66476	4.19296		2020-08-14	2.9845		2020-11-13					30694.9	104	2.92615	2021-07-12			2.90057			2021-07-17	31113.6	139.589	4048.08	80.5556	80.4971	288.92	2021-07-17	2.9758	0.925926		2021-07-17	0.925926		2020-11-13	0.0518052	1.34332	1.25029			2021-07-07	35143.8	105.278	3053.06	64.4444	77.027	285	2021-07-07	3.13739
2023-01-15	1.213	4.29705		2020-08-15	2.97567		2020-11-14					30834.4	105	2.91019	2021-07-13			2.88965			2021-07-20	31253.2	139.589	4187.67	83.3333	81.3329	291.92	2021-07-20	2.89311	0.555556		2021-07-20	0.555556		2020-11-14	0.0522899	1.39561	1.29895			2021-07-08	35249.1	105.278	3158.34	66.6667	77.2973	286	2021-07-08	3.05886
				2020-08-16	2.98524		2020-11-15					30974	106	2.8259	2021-07-15			3.01842			2021-07-25	31392.8	139.589	4327.25	86.1111	82.726	296.92	2021-07-25	2.87732	0.347222		2021-07-25	0.347222		2020-11-15	0.0527746	1.44838	1.34807			2021-07-09	35354.4	105.278	3263.62	68.8889	77.5676	287	2021-07-09	2.97086
				2020-08-17	2.99482		2020-11-16					31113.6	107	2.86149	2021-07-17			2.9758			2021-08-02	31532.4	139.589	4466.84	88.8889	84.9549	304.92	2021-08-02	2.95777	0.347222		2021-08-02	0.347222		2020-11-16	0.0532593	1.50164	1.39765			2021-07-10	35459.6	105.278	3368.9	71.1111	77.8378	288	2021-07-10	2.96153
				2020-08-18	3.00439		2020-11-17					31253.2	108	2.7374	2021-07-20			2.89311			2021-08-10	31672	139.589	4606.43	91.6667	87.1838	312.92	2021-08-10	2.93236	0.396825		2021-08-10	0.396825		2020-11-17	0.053744	1.55538	1.44767			2021-07-11	35564.9	105.278	3474.17	73.3333	78.1081	289	2021-07-11	2.94938
				2020-08-19	3.01396		2020-11-18					31392.8	109	2.71773	2021-07-25			2.87732			2021-08-17	31811.6	139.589	4746.02	94.4444	89.1341	319.92	2021-08-17	2.80314	0.146199		2021-08-17	0.146199		2020-11-18	0.0542287	1.60961	1.49814			2021-07-12	35670.2	105.278	3579.45	75.5556	78.3784	290	2021-07-12	3.00849
				2020-08-20	3.02354		2020-11-19					31532.4	110	2.70439	2021-08-02			2.95777			2021-09-05	31951.2	139.589	4885.61	97.2222	94.4277	338.92	2021-09-05	2.87002	0.138889		2021-09-05	0.138889		2020-11-19	0.0547134	1.66433	1.54906			2021-07-13	35775.5	105.278	3684.73	77.7778	78.6486	291	2021-07-13	2.96482
				2020-08-21	3.03311		2020-11-20					31672	111	2.68549	2021-08-10			2.93236			2021-09-25	32090.7	139.589	5025.2	100	100	358.92	2021-09-25	2.96228	0.0420941		2021-09-25	0.0420941		2020-11-20	0.0551981	1.71952	1.60044			2021-07-14	35880.8	105.278	3790.01	80	78.9189	292	2021-07-14	2.93094
				2020-08-22	3.04268		2020-11-21					31811.6	112	2.61629	2021-08-17			2.80314			2021-11-21 21:06:37	32196	105.278	5147.63	102.436	116.126	416.8	2021-11-21 21:06:37	3.308	0.0420941		2021-11-21 21:06:37	0.0420941		2020-11-21	0.0556828	1.77521	1.65227			2021-07-15	35986	105.278	3895.29	82.2222	79.1892	293	2021-07-15	2.93157
				2020-08-23	3.05226		2020-11-22					31951.2	113	2.49819	2021-09-05			2.87002																	2020-11-22	0.0561675	1.83137	1.70454			2021-07-16	36091.3	105.278	4000.56	84.4444	79.4595	294	2021-07-16	2.97046
				2020-08-24	3.06183		2020-11-23					32090.7	114	2.14092	2021-09-25	2020-09-25		2.96228																	2020-11-23	0.0566522	1.88803	1.75727			2021-07-17	36196.6	105.278	4105.84	86.6667	79.7297	295	2021-07-17	2.87485
				2020-08-25	3.0714		2020-11-24					32196	115	2.22682	2021-11-21 21:06:37	2020-11-21		3.308	1501																2020-11-24	0.0571369	1.94516	1.81045			2021-07-18	36301.9	105.278	4211.12	88.8889	80	296	2021-07-18	2.91373
				2020-08-26	3.08098		2020-11-25					32301.3	116	2.33703		2021-02-20		3.52155																	2020-11-25	0.0576216	2.00278	1.86408			2021-07-20	36407.1	105.278	4316.4	91.1111	80.5405	298	2021-07-20	2.96785
				2020-08-27	3.09055		2020-11-26					32406.6	117	2.39013		2021-03-20		3.46664																	2020-11-26	0.0581063	2.06089	1.91817			2021-07-30	36512.4	105.278	4421.68	93.3333	83.2432	308	2021-07-30	2.87601
				2020-08-28	3.10012		2020-11-27					32511.9	118	2.45782		2021-04-10		3.45464																	2020-11-27	0.0585909	2.11948	1.9727			2021-08-15	36617.7	105.278	4526.95	95.5556	87.5676	324	2021-08-15	2.79432
				2020-08-29	3.1097		2020-11-28					32617.1	119	2.59181		2021-05-10		3.3987																	2020-11-28	0.0590756	2.17856	2.02768			2021-09-06	36723	105.278	4632.23	97.7778	93.5135	346	2021-09-06	2.92822
				2020-08-30	3.11927		2020-11-29					32722.4	120	2.59926		2021-05-20		3.34656																	2020-11-29	0.0595603	2.23812	2.08312			2021-09-30	36828.3	105.278	4737.51	100	100	370	2021-09-30	2.93121
				2020-08-31	3.12884		2020-11-30					32827.7	121	2.52284		2021-05-23		3.22799																	2020-11-30	0.060045	2.29816	2.13901			2021-10-10	36933.5	105.278	4842.79	102.222	102.703	380	2021-10-10	3.10817
				2020-09-01	3.13842		2020-12-01					32933	122	2.59512		2021-05-26		3.35118																	2020-12-01	0.0605297	2.35869	2.19534			2021-11-01	36998.2	64.6263	4927.74	104.015	108.649	402	2021-11-01	3.1687
				2020-09-02	3.14799		2020-12-02					33038.2	123	2.62708		2021-06-03		3.21929																	2020-12-02	0.0610144	2.41971	2.25213			2021-12-01	37062.8	64.6263	4992.37	105.38	116.757	432	2021-12-01	3.33657
				2020-09-03	3.15756		2020-12-03					33143.5	124	2.6519		2021-06-06		3.15257																	2020-12-03	0.0614991	2.48121	2.30937
				2020-09-04	3.16714		2020-12-04					33248.8	125	2.64257		2021-06-09		3.13214																	2020-12-04	0.0619838	2.54319	2.36706
				2020-09-05	3.17671		2020-12-05					33354.1	126	2.5979		2021-06-11		3.14424																	2020-12-05	0.0624685	2.60566	2.42521
				2020-09-06	3.18628		2020-12-06					33459.4	127	2.7059		2021-06-13		3.20084																	2020-12-06	0.0629532	2.66861	2.4838
				2020-09-07	3.19586		2020-12-07					33564.6	128	2.65275		2021-06-15		3.10329																	2020-12-07	0.0634379	2.73205	2.54284
				2020-09-08	3.20543		2020-12-08					33669.9	129	2.63823		2021-06-17		3.04618																	2020-12-08	0.0639226	2.79597	2.60234
				2020-09-09	3.215		2020-12-09					33775.2	130	2.59236		2021-06-19		3.08553																	2020-12-09	0.0644073	2.86038	2.66229
				2020-09-10	3.22458		2020-12-10					33880.5	131	2.67991		2021-06-21		3.14318																	2020-12-10	0.064892	2.92527	2.72269
				2020-09-11	3.23415		2020-12-11					33985.7	132	2.74068		2021-06-23		3.14955																	2020-12-11	0.0653767	2.99065	2.78353
				2020-09-12	3.24372		2020-12-12					34091	133	2.66445		2021-06-25		2.87452																	2020-12-12	0.0658614	3.05651	2.84483
				2020-09-13	3.2533		2020-12-13					34196.3	134	2.87967		2021-06-27		3.06867																	2020-12-13	0.066346	3.12285	2.90659
				2020-09-14	3.26287		2020-12-14					34301.6	135	2.84277		2021-06-29		2.85683																	2020-12-14	0.0668307	3.18969	2.96879
				2020-09-15	3.27244		2020-12-15					34406.9	136	2.91533		2021-06-30		2.97611																	2020-12-15	0.0673154	3.257	3.03144
				2020-09-16	3.28842		2020-12-16					34512.1	137	2.82549		2021-07-01		2.84608																	2020-12-16	0.0678001	3.3248	3.09455
				2020-09-17	3.30439		2020-12-17					34617.4	138	2.83669		2021-07-02		3.12099																	2020-12-17	0.0682848	3.39309	3.1581
				2020-09-18	3.32036		2020-12-18					34722.7	139	2.9099		2021-07-03		2.98912																	2020-12-18	0.0687695	3.46186	3.22211
				2020-09-19	3.33633		2020-12-19					34828	140	2.95683		2021-07-04		3.02409																	2020-12-19	0.0692542	3.53111	3.28657
				2020-09-20	3.35231		2020-12-20					34933.2	141	2.91929		2021-07-05		3.04848																	2020-12-20	0.0697389	3.60085	3.35148
				2020-09-21	3.36828		2020-12-21					35038.5	142	2.93136		2021-07-06		2.98359																	2020-12-21	0.0702236	3.67107	3.41684
				2020-09-22	3.38425		2020-12-22					35143.8	143	2.96312		2021-07-07		3.13739																	2020-12-22	0.0707083	3.74178	3.48265
				2020-09-23	3.40022		2020-12-23					35249.1	144	2.9591		2021-07-08		3.05886																	2020-12-23	0.071193	3.81297	3.54891
				2020-09-24	3.4162		2020-12-24					35354.4	145	2.91359		2021-07-09		2.97086																	2020-12-24	0.0716777	3.88465	3.61563
				2020-09-25	3.43217		2020-12-25					35459.6	146	2.89701		2021-07-10		2.96153																	2020-12-25	0.0721624	3.95681	3.68279
				2020-09-26	3.44814		2020-12-26					35564.9	147	2.91352		2021-07-11		2.94938																	2020-12-26	0.0726471	4.02946	3.75041
				2020-09-27	3.46411		2020-12-27					35670.2	148	2.89627		2021-07-12		3.00849																	2020-12-27	0.0731318	4.10259	3.81847
				2020-09-28	3.48009		2020-12-28					35775.5	149	2.89843		2021-07-13		2.96482																	2020-12-28	0.0736165	4.17621	3.88699
				2020-09-29	3.49606		2020-12-29					35880.8	150	2.87624		2021-07-14		2.93094																	2020-12-29	0.0741011	4.25031	3.95596
				2020-09-30	3.51203		2020-12-30					35986	151	2.76423		2021-07-15		2.93157																	2020-12-30	0.0747852	4.3251	4.02557
				2020-10-01	3.528		2020-12-31					36091.3	152	2.81111		2021-07-16		2.97046																	2020-12-31	0.0758921	4.40099	4.0962
				2020-10-02	3.54398		2021-01-01					36196.6	153	2.84766		2021-07-17		2.87485																	2021-01-01	0.076999	4.47799	4.16787
				2020-10-03	3.55995		2021-01-02					36301.9	154	2.8007		2021-07-18		2.91373																	2021-01-02	0.0781059	4.55609	4.24057
				2020-10-04	3.57592		2021-01-03					36407.1	155	2.77692		2021-07-20		2.96785																	2021-01-03	0.0792128	4.63531	4.31429
				2020-10-05	3.59189		2021-01-04					36512.4	156	2.74088		2021-07-30		2.87601																	2021-01-04	0.0803197	4.71562	4.38905
				2020-10-06	3.60787		2021-01-05					36617.7	157	2.73482		2021-08-15		2.79432																	2021-01-05	0.0814266	4.79705	4.46484
				2020-10-07	3.62384		2021-01-06					36723	158	2.71146		2021-09-06		2.92822																	2021-01-06	0.0825335	4.87959	4.54166
				2020-10-08	3.63981		2021-01-07					36828.3	159	2.46127		2021-09-30	2020-09-30	2.93121																	2021-01-07	0.0836405	4.96323	4.6195
				2020-10-09	3.65578		2021-01-08					36933.5	160	2.11011		2021-10-10	2020-10-10	3.10817																	2021-01-08	0.0847474	5.04797	4.69838
				2020-10-10	3.67176		2021-01-09					36998.2	161	2.07466		2021-11-01	2020-11-01	3.1687	1502																2021-01-09	0.0858543	5.13383	4.77829
				2020-10-11	3.68773		2021-01-10					37062.8	162	2.24381		2021-12-01	2020-12-01	3.33657																	2021-01-10	0.0869612	5.22079	4.85923
				2020-10-12	3.7037		2021-01-11					37127.4	163	2.36169			2020-12-15	3.20675																	2021-01-11	0.0880681	5.30886	4.9412
				2020-10-13	3.71967		2021-01-12					37192	164	2.27611			2020-12-30	3.31478																	2021-01-12	0.089175	5.39803	5.0242
				2020-10-14	3.73564		2021-01-13					37256.7	165	2.34381			2021-01-10	3.28122																	2021-01-13	0.0902819	5.48831	5.10823
				2020-10-15	3.75162		2021-01-14					37321.3	166	2.49248			2021-01-20	3.41895																	2021-01-14	0.0913888	5.5797	5.19329
				2020-10-16	3.76263		2021-01-15					37385.9	167	2.58869			2021-01-30	3.5209																	2021-01-15	0.0924957	5.6722	5.27938
				2020-10-17	3.77365		2021-01-16					37450.5	168	2.68341			2021-02-10	3.47808																	2021-01-16	0.0936026	5.7658	5.3665
				2020-10-18	3.78466		2021-01-17	0.00162308	0.0566752	0.0566752		37515.2	169	2.77492			2021-03-01	3.36708																	2021-01-17	0.0947095	5.86051	5.45465
				2020-10-19	3.79568		2021-01-18	0.00231317	0.0807719	0.137447		37579.8	170	2.69516			2021-03-10	3.45783																	2021-01-18	0.0958164	5.95633	5.54383
				2020-10-20	3.80669		2021-01-19	0.00465443	0.162524	0.299971		37644.4	171	2.698			2021-04-10	3.41034																	2021-01-19	0.0969233	6.05325	5.63404
				2020-10-21	3.81771		2021-01-20	0.00442847	0.154634	0.454605		37709	172	2.6259			2021-04-20	3.39342																	2021-01-20	0.0980302	6.15128	5.72528
				2020-10-22	3.82872		2021-01-21	0.00358961	0.125343	0.579948		37773.7	173	2.63329			2021-04-30	3.36018																	2021-01-21	0.0991371	6.25042	5.81755
				2020-10-23	3.83974		2021-01-22	0.00728257	0.254294	0.834243		37838.3	174	2.62279			2021-05-10	3.32864																	2021-01-22	0.100244	6.35066	5.91086
				2020-10-24	3.85075		2021-01-23	0.00652899	0.227981	1.06222		37902.9	175	2.58115			2021-05-15	3.23672																	2021-01-23	0.101351	6.45201	6.00519
				2020-10-25	3.86177		2021-01-24	0.00802143	0.280094	1.34232		37967.6	176	2.47969			2021-05-20	3.21938																	2021-01-24	0.102458	6.55447	6.10055
				2020-10-26	3.87278		2021-01-25	0.00820178	0.286391	1.62871		38032.2	177	2.28917			2021-05-25	3.0935																	2021-01-25	0.103565	6.65803	6.19694
				2020-10-27	3.8838		2021-01-26	0.00800586	0.27955	1.90826		38096.8	178	2.25929			2021-05-30	3.21807																	2021-01-26	0.104672	6.76271	6.29436
				2020-10-28	3.89481		2021-01-27	0.00560149	0.195594	2.10385		38161.4	179	2.3071			2021-06-02	3.14893																	2021-01-27	0.105779	6.86848	6.39282
				2020-10-29	3.90583		2021-01-28	0.00593808	0.207347	2.3112		38226.1	180	2.34428			2021-06-04	3.09445																	2021-01-28	0.106885	6.97537	6.4923
				2020-10-30	3.91684		2021-01-29	0.00802087	0.280074	2.59127		38290.7	181	2.47558			2021-06-06	3.13485																	2021-01-29	0.107992	7.08336	6.59281
				2020-10-31	3.92786		2021-01-30	0.0052407	0.182996	2.77427		38355.3	182	2.45572			2021-06-08	3.11261																	2021-01-30	0.109099	7.19246	6.69436
				2020-11-01	3.93887		2021-01-31	0.00720264	0.251503	3.02577		38419.9	183	2.47227			2021-06-10	3.04788																	2021-01-31	0.110206	7.30267	6.79693
				2020-11-02	3.94989		2021-02-01	0.00514366	0.179607	3.20538		38484.6	184	2.52131			2021-06-12	3.10996																	2021-02-01	0.111313	7.41398	6.90054
				2020-11-03	3.9609		2021-02-02	0.00664006	0.231859	3.43724		38549.2	185	2.55513			2021-06-13	2.98562																	2021-02-02	0.11242	7.5264	7.00517
				2020-11-04	3.97192		2021-02-03	0.00770368	0.268999	3.70624		38613.8	186	2.69548			2021-06-14	3.20508																	2021-02-03	0.113527	7.63993	7.11084
				2020-11-05	3.98293		2021-02-04	0.00851717	0.297404	4.00364		38678.4	187	2.78686			2021-06-15	3.08441																	2021-02-04	0.114634	7.75456	7.21753
				2020-11-06	3.99395		2021-02-05	0.00658383	0.229895	4.23354		38743.1	188	2.69167			2021-06-16	3.12461																	2021-02-05	0.115741	7.8703	7.32526
				2020-11-07	4.00496		2021-02-06	0.00799764	0.279263	4.5128		38807.7	189	2.95948			2021-06-17	3.1429																	2021-02-06	0.114909	7.98521	7.43221
				2020-11-08	4.01598		2021-02-07	0.0107133	0.37409	4.88689		38872.3	190	2.89124			2021-06-18	3.15569																	2021-02-07	0.114078	8.09929	7.53839
				2020-11-09	4.02699		2021-02-08	0.00595932	0.208089	5.09498		38936.9	191	2.95835			2021-06-19	3.05637																	2021-02-08	0.113246	8.21254	7.64379
				2020-11-10	4.03801		2021-02-09	0.00588526	0.205503	5.30048		39001.6	192	2.9583			2021-06-22	3.11746																	2021-02-09	0.112415	8.32495	7.74842
				2020-11-11	4.04902		2021-02-10	0.00698498	0.243903	5.54439		39066.2	193	2.9525			2021-06-25	3.18503																	2021-02-10	0.111583	8.43653	7.85227
				2020-11-12	4.06004		2021-02-11	0.00700776	0.244698	5.78908		39130.8	194	2.96327			2021-06-28	3.01009																	2021-02-11	0.110752	8.54729	7.95536
				2020-11-13	4.07105		2021-02-12	0.00808409	0.282282	6.07137		39195.5	195	2.98813			2021-07-01	3.02909																	2021-02-12	0.10992	8.65721	8.05766
				2020-11-14	4.08207		2021-02-13	0.0101163	0.353244	6.42461		39260.1	196	2.93215			2021-07-04	3.04548																	2021-02-13	0.109089	8.7663	8.1592
				2020-11-15	4.09308		2021-02-14	0.00844523	0.294892	6.7195		39324.7	197	3.04162			2021-07-07	2.9923																	2021-02-14	0.108258	8.87455	8.25996
				2020-11-16	4.09641		2021-02-15	0.00859643	0.300172	7.01967		39389.3	198	2.94996			2021-07-10	2.95448																	2021-02-15	0.107426	8.98198	8.35995
				2020-11-17	4.09974		2021-02-16	0.00872982	0.30483	7.3245		39454	199	2.93593			2021-07-13	2.96133																	2021-02-16	0.106595	9.08857	8.45916
				2020-11-18	4.10307		2021-02-17	0.00901252	0.314701	7.63921		39518.6	200	2.98507			2021-07-16	3.03422																	2021-02-17	0.105763	9.19434	8.5576
				2020-11-19	4.1064		2021-02-18	0.0077939	0.272149	7.91135		39583.2	201	2.87218			2021-07-19	2.99893																	2021-02-18	0.104932	9.29927	8.65526
				2020-11-20	4.10973		2021-02-19	0.00545787	0.190579	8.10193		39647.8	202	2.91226			2021-07-22	2.98264																	2021-02-19	0.1041	9.40337	8.75215
				2020-11-21	4.11306		2021-02-20	0.00607747	0.212214	8.31415		39712.5	203	2.97734			2021-07-25	2.95102																	2021-02-20	0.103269	9.50664	8.84827
				2020-11-22	4.11639		2021-02-21	0.0076658	0.267676	8.58182		39777.1	204	3.01481			2021-07-28	2.99148																	2021-02-21	0.102437	9.60907	8.94361
				2020-11-23	4.11972		2021-02-22	0.00799446	0.279152	8.86098		39841.7	205	2.95493			2021-07-31	2.93147																	2021-02-22	0.101606	9.71068	9.03818
				2020-11-24	4.12305		2021-02-23	0.00853094	0.297885	9.15886		39906.3	206	2.93077			2021-08-03	2.98945																	2021-02-23	0.100774	9.81145	9.13198
				2020-11-25	4.12637		2021-02-24	0.00908836	0.317349	9.47621		39971	207	2.9555			2021-08-06	3.00029																	2021-02-24	0.0999428	9.9114	9.225
				2020-11-26	4.1297		2021-02-25	0.00917985	0.320544	9.79675		40035.6	208	2.82072			2021-08-09	2.92154																	2021-02-25	0.0991113	10.0105	9.31725
				2020-11-27	4.13303		2021-02-26	0.00862684	0.301234	10.098		40100.2	209	2.89245			2021-08-12	2.99729																	2021-02-26	0.0982799	10.1088	9.40872
				2020-11-28	4.13636		2021-02-27	0.00882567	0.308177	10.4062		40164.8	210	2.73062			2021-08-15	2.80618																	2021-02-27	0.0974484	10.2062	9.49942
				2020-11-29	4.13969		2021-02-28	0.00723535	0.252646	10.6588		40229.5	211	2.6801			2021-08-20	3.00001																	2021-02-28	0.0966169	10.3029	9.58934
				2020-11-30	4.14302		2021-03-01	0.00765083	0.267153	10.926		40294.1	212	2.62557			2021-09-05	2.95654																	2021-03-01	0.0957854	10.3986	9.6785
				2020-12-01	4.14635		2021-03-02	0.00735265	0.256741	11.1827		40358.7	213	2.45564			2021-09-20	3.0181																	2021-03-02	0.0955723	10.4942	9.76745
				2020-12-02	4.14968		2021-03-03	0.0120946	0.422321	11.605		40404.8	214	2.09992			2021-10-05	3.03779	1503																2021-03-03	0.0953593	10.5896	9.85621
				2020-12-03	4.15301		2021-03-04	0.013036	0.455192	12.0602		40451	215	2.05321			2021-10-20	3.21648																	2021-03-04	0.0951462	10.6847	9.94476
				2020-12-04	4.15634		2021-03-05	0.00909734	0.317663	12.3779		40497.1	216	2.10246				3.14746																	2021-03-05	0.0949331	10.7797	10.0331
				2020-12-05	4.15967		2021-03-06	0.0109714	0.3831	12.761		40543.2	217	2.18384				3.20454																	2021-03-06	0.09472	10.8744	10.1213
				2020-12-06	4.163		2021-03-07	0.00783685	0.273649	13.0346		40589.3	218	1.98214				3.04236																	2021-03-07	0.0945069	10.9689	10.2092
				2020-12-07	4.16633		2021-03-08	0.00693559	0.242179	13.2768		40635.4	219	2.2405				3.12544																	2021-03-08	0.0942938	11.0632	10.297
				2020-12-08	4.16965		2021-03-09	0.0126669	0.442307	13.7191		40681.6	220	2.38663				3.29563																	2021-03-09	0.0940807	11.1573	10.3846
				2020-12-09	4.17298		2021-03-10	0.0128907	0.450119	14.1692		40727.7	221	2.33217				3.12828																	2021-03-10	0.0938676	11.2511	10.4719
				2020-12-10	4.17631		2021-03-11	0.00836339	0.292035	14.4613																									2021-03-11	0.0936545	11.3448	10.5591
				2020-12-11	4.17964		2021-03-12	0.00739043	0.25806	14.7193																									2021-03-12	0.0934414	11.4382	10.6461
				2020-12-12	4.18297		2021-03-13	0.00655256	0.228804	14.9481																									2021-03-13	0.0932283	11.5314	10.7328
				2020-12-13	4.1863		2021-03-14	0.0121044	0.422664	15.3708																									2021-03-14	0.0930152	11.6245	10.8194
				2020-12-14	4.18963		2021-03-15	0.0101193	0.353349	15.7241																									2021-03-15	0.0928021	11.7173	10.9058
				2020-12-15	4.19296		2021-03-16	0.00601751	0.210121	15.9343																									2021-03-16	0.092589	11.8098	10.992
				2020-12-16	4.19632		2021-03-17	0.0101694	0.355098	16.2894																									2021-03-17	0.0923759	11.9022	11.078
				2020-12-17	4.19968		2021-03-18	0.00702129	0.245171	16.5345																									2021-03-18	0.0921629	11.9944	11.1637
				2020-12-18	4.20303		2021-03-19	0.0153577	0.536264	17.0708																									2021-03-19	0.0919498	12.0863	11.2493
				2020-12-19	4.20639		2021-03-20	0.00717077	0.250391	17.3212																									2021-03-20	0.0917367	12.1781	11.3347
				2020-12-20	4.20975		2021-03-21	0.0124943	0.436279	17.7575																									2021-03-21	0.0915236	12.2696	11.4199
				2020-12-21	4.21311		2021-03-22	0.0060714	0.212002	17.9695																									2021-03-22	0.0913105	12.3609	11.5049
				2020-12-22	4.21646		2021-03-23	0.00815377	0.284715	18.2542																									2021-03-23	0.0910974	12.452	11.5897
				2020-12-23	4.21982		2021-03-24	0.00645717	0.225473	18.4797																									2021-03-24	0.0908843	12.5429	11.6743
				2020-12-24	4.22318		2021-03-25	0.0111503	0.389349	18.869																									2021-03-25	0.0906712	12.6336	11.7586
				2020-12-25	4.22654		2021-03-26	0.00599016	0.209165	19.0782																									2021-03-26	0.0904581	12.724	11.8428
				2020-12-26	4.22989		2021-03-27	0.0156328	0.545868	19.624																									2021-03-27	0.090245	12.8143	11.9268
				2020-12-27	4.23325		2021-03-28	0.0127035	0.443584	20.0676																									2021-03-28	0.0900319	12.9043	12.0106
				2020-12-28	4.23661		2021-03-29	0.00745901	0.260455	20.3281																									2021-03-29	0.0898188	12.9941	12.0942
				2020-12-29	4.23997		2021-03-30	0.013271	0.4634	20.7915																									2021-03-30	0.0896057	13.0837	12.1776
				2020-12-30	4.24333		2021-03-31	0.00836057	0.291936	21.0834																									2021-03-31	0.0916933	13.1754	12.263
				2020-12-31	4.24668		2021-04-01	0.00727003	0.253856	21.3373																									2021-04-01	0.0937809	13.2692	12.3503
				2021-01-01	4.25004		2021-04-02	0.0104299	0.364195	21.7015																									2021-04-02	0.0958685	13.3651	12.4395
				2021-01-02	4.2534		2021-04-03	0.0080031	0.279454	21.9809																									2021-04-03	0.0979561	13.463	12.5307
				2021-01-03	4.25676		2021-04-04	0.0104126	0.36359	22.3445																									2021-04-04	0.100044	13.5631	12.6238
				2021-01-04	4.26011		2021-04-05	0.0102856	0.359154	22.7037																									2021-04-05	0.102131	13.6652	12.7188
				2021-01-05	4.26347		2021-04-06	0.0141467	0.493976	23.1976																									2021-04-06	0.104219	13.7694	12.8158
				2021-01-06	4.26683		2021-04-07	0.00887515	0.309904	23.5075																									2021-04-07	0.106306	13.8757	12.9148
				2021-01-07	4.27019		2021-04-08	0.00995309	0.347544	23.8551																									2021-04-08	0.108394	13.9841	13.0157
				2021-01-08	4.27355		2021-04-09	0.00986353	0.344417	24.1995																									2021-04-09	0.110482	14.0946	13.1185
				2021-01-09	4.2769		2021-04-10	0.00719027	0.251071	24.4506																									2021-04-10	0.112569	14.2072	13.2233
				2021-01-10	4.28026		2021-04-11	0.0115578	0.403578	24.8542																									2021-04-11	0.114657	14.3218	13.33
				2021-01-11	4.28362		2021-04-12	0.00968094	0.338041	25.1922																									2021-04-12	0.116744	14.4386	13.4386
				2021-01-12	4.28698		2021-04-13	0.0109104	0.380973	25.5732																									2021-04-13	0.118832	14.5574	13.5492
				2021-01-13	4.29033		2021-04-14	0.0112942	0.394373	25.9675																									2021-04-14	0.12092	14.6783	13.6618
				2021-01-14	4.29369		2021-04-15	0.0160704	0.56115	26.5287																									2021-04-15	0.123007	14.8013	13.7763
				2021-01-15	4.29705		2021-04-16	0.00606442	0.211759	26.7405																									2021-04-16	0.125095	14.9264	13.8927
				2021-01-16	4.30043		2021-04-17	0.00912758	0.318719	27.0592																									2021-04-17	0.127182	15.0536	14.0111
				2021-01-17	4.3038		2021-04-18	0.0104275	0.364111	27.4233																									2021-04-18	0.12927	15.1829	14.1314
				2021-01-18	4.30718		2021-04-19	0.00582106	0.203261	27.6265																									2021-04-19	0.131358	15.3142	14.2537
				2021-01-19	4.31055		2021-04-20	0.00661866	0.231112	27.8577																									2021-04-20	0.133445	15.4477	14.3779
				2021-01-20	4.31393		2021-04-21	0.00683159	0.238547	28.0962																									2021-04-21	0.135533	15.5832	14.504
				2021-01-21	4.31731		2021-04-22	0.0113338	0.395756	28.492																									2021-04-22	0.13762	15.7208	14.6321
				2021-01-22	4.32068		2021-04-23	0.011334	0.395762	28.8877																									2021-04-23	0.139708	15.8605	14.7621
				2021-01-23	4.32406		2021-04-24	0.0143945	0.502629	29.3903																									2021-04-24	0.141795	16.0023	14.8941
				2021-01-24	4.32744		2021-04-25	0.0133048	0.464581	29.8549																									2021-04-25	0.143883	16.1462	15.028
				2021-01-25	4.33081		2021-04-26	0.0146089	0.510115	30.365																									2021-04-26	0.145971	16.2922	15.1639
				2021-01-26	4.33419		2021-04-27	0.0184592	0.644562	31.0096																									2021-04-27	0.148058	16.4402	15.3017
				2021-01-27	4.33756		2021-04-28	0.021929	0.765721	31.7753																									2021-04-28	0.150146	16.5904	15.4414
				2021-01-28	4.34094		2021-04-29	0.0185596	0.648068	32.4234																									2021-04-29	0.152233	16.7426	15.5831
				2021-01-29	4.34432		2021-04-30	0.0223312	0.779767	33.2032																									2021-04-30	0.154321	16.8969	15.7268
				2021-01-30	4.34769		2021-05-01	0.0204458	0.713929	33.9171																									2021-05-01	0.184328	17.0813	15.8983
				2021-01-31	4.35107		2021-05-02	0.0252743	0.882534	34.7996																									2021-05-02	0.214335	17.2956	16.0978
				2021-02-01	4.35445		2021-05-03	0.0222974	0.778586	35.5782																									2021-05-03	0.244342	17.5399	16.3252
				2021-02-02	4.35782		2021-05-04	0.0208521	0.728117	36.3063																									2021-05-04	0.274348	17.8143	16.5806
				2021-02-03	4.3612		2021-05-05	0.0210004	0.733296	37.0396																									2021-05-05	0.304355	18.1187	16.8639
				2021-02-04	4.36457		2021-05-06	0.0167528	0.584978	37.6246																									2021-05-06	0.334362	18.453	17.1751
				2021-02-05	4.36795		2021-05-07	0.0202769	0.708033	38.3326																									2021-05-07	0.364369	18.8174	17.5142
				2021-02-06	4.37133		2021-05-08	0.0242458	0.846621	39.1793																									2021-05-08	0.394376	19.2118	17.8813
				2021-02-07	4.3747		2021-05-09	0.0212608	0.742389	39.9216																									2021-05-09	0.424383	19.6361	18.2763
				2021-02-08	4.37808		2021-05-10	0.0212601	0.742363	40.664																									2021-05-10	0.45439	20.0905	18.6992
				2021-02-09	4.38145		2021-05-11	0.0242458	0.846621	41.5106																									2021-05-11	0.484396	20.5749	19.15
				2021-02-10	4.38483		2021-05-12	0.0113529	0.396422	41.9071																									2021-05-12	0.514403	21.0893	19.6288
				2021-02-11	4.38821		2021-05-13	0.0113363	0.395845	42.3029																									2021-05-13	0.54441	21.6337	20.1355
				2021-02-12	4.39158		2021-05-14	0.0156972	0.54812	42.851																									2021-05-14	0.574417	22.2082	20.6702
				2021-02-13	4.39496		2021-05-15	0.0229567	0.801608	43.6526																									2021-05-15	0.604424	22.8126	21.2327
				2021-02-14	4.39834		2021-05-16	0.0141717	0.494851	44.1475																									2021-05-16	0.634431	23.447	21.8232
				2021-02-15	4.40171		2021-05-17	0.00977192	0.341218	44.4887																									2021-05-17	0.664438	24.1114	22.4416
				2021-02-16	4.40286		2021-05-18	0.0118209	0.412765	44.9015																									2021-05-18	0.694444	24.8059	23.088
				2021-02-17	4.40401		2021-05-19	0.0185387	0.647339	45.5488																									2021-05-19	0.694444	25.5003	23.7343
				2021-02-18	4.40515		2021-05-20	0.0244648	0.854267	46.4031																									2021-05-20	0.694444	26.1948	24.3807
				2021-02-19	4.4063		2021-05-21	0.0198034	0.691499	47.0946																									2021-05-21	0.694444	26.8892	25.0271
				2021-02-20	4.40744		2021-05-22	0.0271941	0.949568	48.0441																									2021-05-22	0.694444	27.5837	25.6734
				2021-02-21	4.40859		2021-05-23	0.0194222	0.678189	48.7223																									2021-05-23	0.694444	28.2781	26.3198
				2021-02-22	4.40974		2021-05-24	0.0294062	1.02681	49.7491																									2021-05-24	0.694444	28.9726	26.9661
				2021-02-23	4.41088		2021-05-25	0.0207853	0.725785	50.4749																									2021-05-25	0.694444	29.667	27.6125
				2021-02-24	4.41203		2021-05-26	0.0276876	0.966802	51.4417																									2021-05-26	0.694444	30.3614	28.2588
				2021-02-25	4.41318		2021-05-27	0.0243375	0.84982	52.2915																									2021-05-27	0.694444	31.0559	28.9052
				2021-02-26	4.41432		2021-05-28	0.0291598	1.01821	53.3097																									2021-05-28	0.694444	31.7503	29.5515
				2021-02-27	4.41547		2021-05-29	0.0286934	1.00192	54.3117																									2021-05-29	0.694444	32.4448	30.1979
				2021-02-28	4.41662		2021-05-30	0.0248346	0.86718	55.1788																									2021-05-30	0.694444	33.1392	30.8442
				2021-03-01	4.41776		2021-05-31	0.0264359	0.923095	56.1019																									2021-05-31	0.694444	33.8337	31.4906
				2021-03-02	4.41891		2021-06-01	0.031204	1.08959	57.1915																									2021-06-01	0.694444	34.5281	32.1369
				2021-03-03	4.42006		2021-06-02	0.027956	0.976174	58.1677																									2021-06-02	0.694444	35.2226	32.7833
				2021-03-04	4.4212		2021-06-03	0.0256404	0.895318	59.063																									2021-06-03	0.694444	35.917	33.4296
				2021-03-05	4.42235		2021-06-04	0.0250981	0.876381	59.9394																									2021-06-04	0.694444	36.6114	34.076
				2021-03-06	4.4235		2021-06-05	0.0238413	0.832494	60.7719																									2021-06-05	0.694444	37.3059	34.7223
				2021-03-07	4.42464		2021-06-06	0.0233267	0.814526	61.5864																									2021-06-06	0.694444	38.0003	35.3687
				2021-03-08	4.42579		2021-06-07	0.0234569	0.819074	62.4055																									2021-06-07	0.694444	38.6948	36.015
				2021-03-09	4.42694		2021-06-08	0.0239515	0.836343	63.2418																									2021-06-08	0.694444	39.3892	36.6614
				2021-03-10	4.42808		2021-06-09	0.0280108	0.978086	64.2199																									2021-06-09	0.694444	40.0837	37.3077
				2021-03-11	4.42923		2021-06-10	0.0243433	0.850026	65.07																									2021-06-10	0.694444	40.7781	37.9541
				2021-03-12	4.43038		2021-06-11	0.0196026	0.684488	65.7544																									2021-06-11	0.694444	41.4726	38.6004
				2021-03-13	4.43152		2021-06-12	0.0131174	0.458037	66.2125																									2021-06-12	0.694444	42.167	39.2468
				2021-03-14	4.43267		2021-06-13	0.0188776	0.659172	66.8716																									2021-06-13	0.694444	42.8614	39.8931
				2021-03-15	4.43382		2021-06-14	0.0298702	1.04301	67.9147																									2021-06-14	0.694444	43.5559	40.5395
				2021-03-16	4.43278		2021-06-15	0.0277924	0.970461	68.8851																									2021-06-15	0.694444	44.2503	41.1858
				2021-03-17	4.43174		2021-06-16	0.0261825	0.914245	69.7994																									2021-06-16	0.694444	44.9448	41.8322
				2021-03-18	4.43071		2021-06-17	0.0192857	0.673422	70.4728																									2021-06-17	0.694444	45.6392	42.4785
				2021-03-19	4.42967		2021-06-18	0.0134889	0.471008	70.9438																									2021-06-18	0.694444	46.3337	43.1249
				2021-03-20	4.42864		2021-06-19	0.0217786	0.760469	71.7043																									2021-06-19	0.694444	47.0281	43.7713
				2021-03-21	4.4276		2021-06-20	0.0281451	0.982776	72.687																									2021-06-20	0.694444	47.7226	44.4176
				2021-03-22	4.42657		2021-06-21	0.00852544	0.297693	72.9847																									2021-06-21	0.694444	48.417	45.064
				2021-03-23	4.42553		2021-06-22	0.0189648	0.662218	73.647																									2021-06-22	0.694444	49.1114	45.7103
				2021-03-24	4.42449		2021-06-23	0.0261964	0.914731	74.5617																									2021-06-23	0.694444	49.8059	46.3567
				2021-03-25	4.42346		2021-06-24	0.029431	1.02768	75.5894																									2021-06-24	0.694444	50.5003	47.003
				2021-03-26	4.42242		2021-06-25	0.0156979	0.548143	76.1375																									2021-06-25	0.694444	51.1948	47.6494
				2021-03-27	4.42139		2021-06-26	0.0153861	0.537253	76.6748																									2021-06-26	0.694444	51.8892	48.2957
				2021-03-28	4.42035		2021-06-27	0.0295025	1.03018	77.7049																									2021-06-27	0.694444	52.5837	48.9421
				2021-03-29	4.41932		2021-06-28	0.0253872	0.886475	78.5914																									2021-06-28	0.868056	53.4517	49.75
				2021-03-30	4.41828		2021-06-29	0.0172989	0.604047	79.1955																									2021-06-29	1.04167	54.4934	50.7195
				2021-03-31	4.41724		2021-06-30	0.0163535	0.571034	79.7665																									2021-06-30	1.21528	55.7087	51.8506
				2021-04-01	4.41621		2021-07-01	0.0139599	0.487456	80.2539																									2021-07-01	1.38889	57.0976	53.1434
				2021-04-02	4.41517		2021-07-02	0.0106331	0.371287	80.6252																									2021-07-02	1.38889	58.4864	54.4361
				2021-04-03	4.41414		2021-07-03	0.0102187	0.356817	80.9821																									2021-07-03	1.38889	59.8753	55.7288
				2021-04-04	4.4131		2021-07-04	0.00998023	0.348492	81.3305																									2021-07-04	2.08333	61.9587	57.6678
				2021-04-05	4.41207		2021-07-05	0.0136225	0.475673	81.8062																									2021-07-05	2.77778	64.7364	60.2532
				2021-04-06	4.41103		2021-07-06	0.0121041	0.422653	82.2289																									2021-07-06	2.77778	67.5142	62.8386
				2021-04-07	4.40999		2021-07-07	0.0229959	0.802976	83.0318																									2021-07-07	2.77778	70.292	65.424
				2021-04-08	4.40896		2021-07-08	0.0176881	0.617637	83.6495																									2021-07-08	2.77778	73.0698	68.0094
				2021-04-09	4.40792		2021-07-09	0.0121477	0.424177	84.0737																									2021-07-09	2.77778	75.8476	70.5948
				2021-04-10	4.40689		2021-07-10	0.0104992	0.366615	84.4403																									2021-07-10	2.77778	78.6253	73.1803
				2021-04-11	4.40585		2021-07-11	0.0145139	0.506798	84.9471																									2021-07-11	2.77778	81.4031	75.7657
				2021-04-12	4.40482		2021-07-12	0.0141021	0.49242	85.4395																									2021-07-12	2.77778	84.1809	78.3511
				2021-04-13	4.40378		2021-07-13	0.0135269	0.472335	85.9118																									2021-07-13	1.38889	85.5698	79.6438
				2021-04-14	4.40274		2021-07-14	0.0129783	0.453179	86.365																									2021-07-14	1.38889	86.9587	80.9365
				2021-04-15	4.40171		2021-07-15	0.0100045	0.349338	86.7143																									2021-07-15	1.38889	88.3476	82.2292
				2021-04-16	4.39395		2021-07-16	0.0136178	0.47551	87.1899																									2021-07-16	1.15741	89.505	83.3064
				2021-04-17	4.38619		2021-07-17	0.0147056	0.513492	87.7033																									2021-07-17	0.925926	90.4309	84.1682
				2021-04-18	4.37843		2021-07-18	0.0132985	0.464361	88.1677																									2021-07-18	0.802469	91.2334	84.9151
				2021-04-19	4.37067		2021-07-19	0.00719801	0.251341	88.419																									2021-07-19	0.679012	91.9124	85.5471
				2021-04-20	4.36291		2021-07-20	0.00789433	0.275656	88.6947																									2021-07-20	0.555556	92.4679	86.0642
				2021-04-21	4.35515		2021-07-21	0.0104473	0.364802	89.0595																									2021-07-21	0.513889	92.9818	86.5425
				2021-04-22	4.34739		2021-07-22	0.0084481	0.294992	89.3545																									2021-07-22	0.472222	93.454	86.982
				2021-04-23	4.33963		2021-07-23	0.0079078	0.276126	89.6306																									2021-07-23	0.430556	93.8846	87.3828
				2021-04-24	4.33187		2021-07-24	0.00647647	0.226147	89.8568																									2021-07-24	0.388889	94.2735	87.7447
				2021-04-25	4.32411		2021-07-25	0.0119479	0.417199	90.274																									2021-07-25	0.347222	94.6207	88.0679
				2021-04-26	4.31635		2021-07-26	0.00934429	0.326286	90.6003																									2021-07-26	0.347222	94.9679	88.3911
				2021-04-27	4.30859		2021-07-27	0.0146351	0.511032	91.1113																									2021-07-27	0.347222	95.3152	88.7142
				2021-04-28	4.30083		2021-07-28	0.0102297	0.357203	91.4685																									2021-07-28	0.347222	95.6624	89.0374
				2021-04-29	4.29307		2021-07-29	0.00610205	0.213073	91.6816																									2021-07-29	0.347222	96.0096	89.3606
				2021-04-30	4.28531		2021-07-30	0.00836632	0.292137	91.9737																									2021-07-30	0.347222	96.3568	89.6838
				2021-05-01	4.27755		2021-07-31	0.0139355	0.486602	92.4603																									2021-07-31	0.347222	96.704	90.0069
				2021-05-02	4.2698		2021-08-01	0.00794704	0.277497	92.7378																									2021-08-01	0.347222	97.0513	90.3301
				2021-05-03	4.26204		2021-08-02	0.00842663	0.294243	93.032																									2021-08-02	0.347222	97.3985	90.6533
				2021-05-04	4.25428		2021-08-03	0.00891621	0.311338	93.3434																									2021-08-03	0.353423	97.7519	90.9822
				2021-05-05	4.24652		2021-08-04	0.0069622	0.243107	93.5865																									2021-08-04	0.359623	98.1115	91.317
				2021-05-06	4.23876		2021-08-05	0.00719603	0.251272	93.8378																									2021-08-05	0.365823	98.4774	91.6574
				2021-05-07	4.231		2021-08-06	0.0124054	0.433173	94.2709																									2021-08-06	0.372024	98.8494	92.0037
				2021-05-08	4.22324		2021-08-07	0.0132363	0.462189	94.7331																									2021-08-07	0.378224	99.2276	92.3557
				2021-05-09	4.21548		2021-08-08	0.00722523	0.252292	94.9854																									2021-08-08	0.384425	99.612	92.7135
				2021-05-10	4.20772		2021-08-09	0.00724855	0.253106	95.2385																									2021-08-09	0.390625	100.003	93.0771
				2021-05-11	4.19996		2021-08-10	0.0163152	0.569697	95.8082																									2021-08-10	0.396825	100.399	93.4465
				2021-05-12	4.1922		2021-08-11	0.0112138	0.391565	96.1998																									2021-08-11	0.361022	100.761	93.7825
				2021-05-13	4.18444		2021-08-12	0.0149156	0.520824	96.7206																									2021-08-12	0.325218	101.086	94.0852
				2021-05-14	4.17668		2021-08-13	0.00584759	0.204188	96.9248																									2021-08-13	0.289414	101.375	94.3545
				2021-05-15	4.16892		2021-08-14	0.00474333	0.165629	97.0904																									2021-08-14	0.25361	101.629	94.5906
				2021-05-16	4.15453		2021-08-15	0.010053	0.351032	97.4415																									2021-08-15	0.217806	101.847	94.7933
				2021-05-17	4.14014		2021-08-16	0.00865225	0.302121	97.7436																									2021-08-16	0.182003	102.029	94.9627
				2021-05-18	4.12576		2021-08-17	0.0124725	0.435516	98.1791																									2021-08-17	0.146199	102.175	95.0988
				2021-05-19	4.11137		2021-08-18	0.00868443	0.303245	98.4823																									2021-08-18	0.145814	102.321	95.2345
				2021-05-20	4.09698		2021-08-19	0.00768443	0.268327	98.7507																									2021-08-19	0.145429	102.466	95.3699
				2021-05-21	4.08259		2021-08-20	0.006478	0.2262	98.9769																									2021-08-20	0.145045	102.611	95.5049
				2021-05-22	4.06821		2021-08-21	0.00981495	0.342721	99.3196																									2021-08-21	0.14466	102.756	95.6395
				2021-05-23	4.05382		2021-08-22	0.00527151	0.184072	99.5037																									2021-08-22	0.144275	102.9	95.7738
				2021-05-24	4.03943		2021-08-23	0.00540177	0.18862	99.6923																									2021-08-23	0.14389	103.044	95.9077
				2021-05-25	4.02504		2021-08-24	0.00456056	0.159247	99.8515																									2021-08-24	0.143506	103.187	96.0413
				2021-05-26	4.01066		2021-08-25	0.00425205	0.148474	100																									2021-08-25	0.143121	103.33	96.1745
				2021-05-27	3.99627		2021-08-26																												2021-08-26	0.142736	103.473	96.3073
				2021-05-28	3.98188		2021-08-27																												2021-08-27	0.142351	103.616	96.4398
				2021-05-29	3.96749		2021-08-28																												2021-08-28	0.141967	103.758	96.572
				2021-05-30	3.95311		2021-08-29																												2021-08-29	0.141582	103.899	96.7037
				2021-05-31	3.93872		2021-08-30																												2021-08-30	0.141197	104.04	96.8352
				2021-06-01	3.92433		2021-08-31																												2021-08-31	0.140813	104.181	96.9662
				2021-06-02	3.90994		2021-09-01																												2021-09-01	0.140428	104.322	97.0969
				2021-06-03	3.89556		2021-09-02																												2021-09-02	0.140043	104.462	97.2273
				2021-06-04	3.88117		2021-09-03																												2021-09-03	0.139658	104.601	97.3573
				2021-06-05	3.86678		2021-09-04																												2021-09-04	0.139274	104.741	97.4869
				2021-06-06	3.85239		2021-09-05																												2021-09-05	0.138889	104.879	97.6162
				2021-06-07	3.83801		2021-09-06																												2021-09-06	0.134049	105.013	97.7409
				2021-06-08	3.82362		2021-09-07																												2021-09-07	0.129209	105.143	97.8612
				2021-06-09	3.80923		2021-09-08																												2021-09-08	0.12437	105.267	97.9769
				2021-06-10	3.79484		2021-09-09																												2021-09-09	0.11953	105.387	98.0882
				2021-06-11	3.78046		2021-09-10																												2021-09-10	0.11469	105.501	98.1949
				2021-06-12	3.76607		2021-09-11																												2021-09-11	0.10985	105.611	98.2972
				2021-06-13	3.75168		2021-09-12																												2021-09-12	0.105011	105.716	98.3949
				2021-06-14	3.73729		2021-09-13																												2021-09-13	0.100171	105.816	98.4882
				2021-06-15	3.72291		2021-09-14																												2021-09-14	0.0953312	105.912	98.5769
				2021-06-16	3.70713		2021-09-15																												2021-09-15	0.0904915	106.002	98.6611
				2021-06-17	3.69135		2021-09-16																												2021-09-16	0.0856518	106.088	98.7408
				2021-06-18	3.67557		2021-09-17																												2021-09-17	0.080812	106.169	98.816
				2021-06-19	3.65979		2021-09-18																												2021-09-18	0.0759723	106.245	98.8868
				2021-06-20	3.64402		2021-09-19																												2021-09-19	0.0711325	106.316	98.953
				2021-06-21	3.62824		2021-09-20																												2021-09-20	0.0662928	106.382	99.0147
				2021-06-22	3.61246		2021-09-21																												2021-09-21	0.0614531	106.443	99.0719
				2021-06-23	3.59668		2021-09-22																												2021-09-22	0.0566133	106.5	99.1245
				2021-06-24	3.58091		2021-09-23																												2021-09-23	0.0517736	106.552	99.1727
				2021-06-25	3.56513		2021-09-24																												2021-09-24	0.0469338	106.599	99.2164
				2021-06-26	3.54935		2021-09-25																												2021-09-25	0.0420941	106.641	99.2556
				2021-06-27	3.53357		2021-09-26																												2021-09-26	0.0420941	106.683	99.2948
				2021-06-28	3.5178		2021-09-27																												2021-09-27	0.0420941	106.725	99.334
				2021-06-29	3.50202		2021-09-28																												2021-09-28	0.0420941	106.767	99.3731
				2021-06-30	3.48624		2021-09-29																												2021-09-29	0.0420941	106.809	99.4123
				2021-07-01	3.47046		2021-09-30																												2021-09-30	0.0420941	106.851	99.4515
				2021-07-02	3.45469		2021-10-01																												2021-10-01	0.0420941	106.893	99.4907
				2021-07-03	3.43891		2021-10-02																												2021-10-02	0.0420941	106.936	99.5299
				2021-07-04	3.42313		2021-10-03																												2021-10-03	0.0420941	106.978	99.569
				2021-07-05	3.40735		2021-10-04																												2021-10-04	0.0420941	107.02	99.6082
				2021-07-06	3.39157		2021-10-05																												2021-10-05	0.0420941	107.062	99.6474
				2021-07-07	3.3758		2021-10-06																												2021-10-06	0.0420941	107.104	99.6866
				2021-07-08	3.36002		2021-10-07																												2021-10-07	0.0420941	107.146	99.7257
				2021-07-09	3.34424		2021-10-08																												2021-10-08	0.0420941	107.188	99.7649
				2021-07-10	3.32846		2021-10-09																												2021-10-09	0.0420941	107.23	99.8041
				2021-07-11	3.31269		2021-10-10																												2021-10-10	0.0420941	107.272	99.8433
				2021-07-12	3.29691		2021-10-11																												2021-10-11	0.0420941	107.314	99.8825
				2021-07-13	3.28113		2021-10-12																												2021-10-12	0.0420941	107.356	99.9216
				2021-07-14	3.26535		2021-10-13																												2021-10-13	0.0420941	107.399	99.9608
				2021-07-15	3.24958		2021-10-14																												2021-10-14	0.0420941	107.441	100
				2021-07-16	3.24074
				2021-07-17	3.2319
				2021-07-18	3.22307
				2021-07-19	3.21423
				2021-07-20	3.2054
				2021-07-21	3.19656
				2021-07-22	3.18773
				2021-07-23	3.17889
				2021-07-24	3.17005
				2021-07-25	3.16122
				2021-07-26	3.15238
				2021-07-27	3.14355
				2021-07-28	3.13471
				2021-07-29	3.12588
				2021-07-30	3.11704
				2021-07-31	3.1082
				2021-08-01	3.09937
				2021-08-02	3.09053
				2021-08-03	3.0817
				2021-08-04	3.07286
				2021-08-05	3.06403
				2021-08-06	3.05519
				2021-08-07	3.04635
				2021-08-08	3.03752
				2021-08-09	3.02868
				2021-08-10	3.01985
				2021-08-11	3.01101
				2021-08-12	3.00218
				2021-08-13	2.99334
				2021-08-14	2.9845
				2021-08-15	2.97567
				2021-08-16	2.98524
				2021-08-17	2.99482
				2021-08-18	3.00439
				2021-08-19	3.01396
				2021-08-20	3.02354
				2021-08-21	3.03311
				2021-08-22	3.04268
				2021-08-23	3.05226
				2021-08-24	3.06183
				2021-08-25	3.0714
				2021-08-26	3.08098
				2021-08-27	3.09055
				2021-08-28	3.10012
				2021-08-29	3.1097
				2021-08-30	3.11927
				2021-08-31	3.12884
				2021-09-01	3.13842
				2021-09-02	3.14799
				2021-09-03	3.15756
				2021-09-04	3.16714
				2021-09-05	3.17671
				2021-09-06	3.18628
				2021-09-07	3.19586
				2021-09-08	3.20543
				2021-09-09	3.215
				2021-09-10	3.22458
				2021-09-11	3.23415
				2021-09-12	3.24372
				2021-09-13	3.2533
				2021-09-14	3.26287
				2021-09-15	3.27244
				2021-09-16	3.28842
				2021-09-17	3.30439
				2021-09-18	3.32036
				2021-09-19	3.33633
				2021-09-20	3.35231
				2021-09-21	3.36828
				2021-09-22	3.38425
				2021-09-23	3.40022
				2021-09-24	3.4162
				2021-09-25	3.43217
				2021-09-26	3.44814
				2021-09-27	3.46411
				2021-09-28	3.48009
				2021-09-29	3.49606
				2021-09-30	3.51203
				2021-10-01	3.528
				2021-10-02	3.54398
				2021-10-03	3.55995
				2021-10-04	3.57592
				2021-10-05	3.59189
				2021-10-06	3.60787
				2021-10-07	3.62384
				2021-10-08	3.63981
				2021-10-09	3.65578
				2021-10-10	3.67176
				2021-10-11	3.68773
				2021-10-12	3.7037
				2021-10-13	3.71967
				2021-10-14	3.73564
				2021-10-15	3.75162
				2021-10-16	3.76263
				2021-10-17	3.77365
				2021-10-18	3.78466
				2021-10-19	3.79568
				2021-10-20	3.80669
				2021-10-21	3.81771
				2021-10-22	3.82872
				2021-10-23	3.83974
				2021-10-24	3.85075
				2021-10-25	3.86177
				2021-10-26	3.87278
				2021-10-27	3.8838
				2021-10-28	3.89481
				2021-10-29	3.90583
				2021-10-30	3.91684
				2021-10-31	3.92786
				2021-11-01	3.93887
				2021-11-02	3.94989
				2021-11-03	3.9609
				2021-11-04	3.97192
				2021-11-05	3.98293
				2021-11-06	3.99395
				2021-11-07	4.00496
				2021-11-08	4.01598
				2021-11-09	4.02699
				2021-11-10	4.03801
				2021-11-11	4.04902
				2021-11-12	4.06004
				2021-11-13	4.07105
				2021-11-14	4.08207
				2021-11-15	4.09308
				2021-11-16	4.09641
				2021-11-17	4.09974
				2021-11-18	4.10307
				2021-11-19	4.1064
				2021-11-20	4.10973
				2021-11-21	4.11306
				2021-11-22	4.11639
				2021-11-23	4.11972
				2021-11-24	4.12305
				2021-11-25	4.12637
				2021-11-26	4.1297
				2021-11-27	4.13303
				2021-11-28	4.13636
				2021-11-29	4.13969
				2021-11-30	4.14302
				2021-12-01	4.14635
				2021-12-02	4.14968
				2021-12-03	4.15301
				2021-12-04	4.15634
				2021-12-05	4.15967
				2021-12-06	4.163
				2021-12-07	4.16633
				2021-12-08	4.16965
				2021-12-09	4.17298
				2021-12-10	4.17631
				2021-12-11	4.17964
				2021-12-12	4.18297
				2021-12-13	4.1863
				2021-12-14	4.18963
				2021-12-15	4.19296
				2021-12-16	4.19632
				2021-12-17	4.19968
				2021-12-18	4.20303
				2021-12-19	4.20639
				2021-12-20	4.20975
				2021-12-21	4.21311
				2021-12-22	4.21646
				2021-12-23	4.21982
				2021-12-24	4.22318
				2021-12-25	4.22654
				2021-12-26	4.22989
				2021-12-27	4.23325
				2021-12-28	4.23661
				2021-12-29	4.23997
				2021-12-30	4.24333
				2021-12-31	4.24668
				2022-01-01	4.25004
				2022-01-02	4.2534
				2022-01-03	4.25676
				2022-01-04	4.26011
				2022-01-05	4.26347
				2022-01-06	4.26683
				2022-01-07	4.27019
				2022-01-08	4.27355
				2022-01-09	4.2769
				2022-01-10	4.28026
				2022-01-11	4.28362
				2022-01-12	4.28698
				2022-01-13	4.29033
				2022-01-14	4.29369
				2022-01-15	4.29705
				2022-01-16	4.30043
				2022-01-17	4.3038
				2022-01-18	4.30718
				2022-01-19	4.31055
				2022-01-20	4.31393
				2022-01-21	4.31731
				2022-01-22	4.32068
				2022-01-23	4.32406
				2022-01-24	4.32744
				2022-01-25	4.33081
				2022-01-26	4.33419
				2022-01-27	4.33756
				2022-01-28	4.34094
				2022-01-29	4.34432
				2022-01-30	4.34769
				2022-01-31	4.35107
				2022-02-01	4.35445
				2022-02-02	4.35782
				2022-02-03	4.3612
				2022-02-04	4.36457
				2022-02-05	4.36795
				2022-02-06	4.37133
				2022-02-07	4.3747
				2022-02-08	4.37808
				2022-02-09	4.38145
				2022-02-10	4.38483
				2022-02-11	4.38821
				2022-02-12	4.39158
				2022-02-13	4.39496
				2022-02-14	4.39834
				2022-02-15	4.40171
				2022-02-16	4.40286
				2022-02-17	4.40401
				2022-02-18	4.40515
				2022-02-19	4.4063
				2022-02-20	4.40744
				2022-02-21	4.40859
				2022-02-22	4.40974
				2022-02-23	4.41088
				2022-02-24	4.41203
				2022-02-25	4.41318
				2022-02-26	4.41432
				2022-02-27	4.41547
				2022-02-28	4.41662
				2022-03-01	4.41776
				2022-03-02	4.41891
				2022-03-03	4.42006
				2022-03-04	4.4212
				2022-03-05	4.42235
				2022-03-06	4.4235
				2022-03-07	4.42464
				2022-03-08	4.42579
				2022-03-09	4.42694
				2022-03-10	4.42808
				2022-03-11	4.42923
				2022-03-12	4.43038
				2022-03-13	4.43152
				2022-03-14	4.43267
				2022-03-15	4.43382
				2022-03-16	4.43278
				2022-03-17	4.43174
				2022-03-18	4.43071
				2022-03-19	4.42967
				2022-03-20	4.42864
				2022-03-21	4.4276
				2022-03-22	4.42657
				2022-03-23	4.42553
				2022-03-24	4.42449
				2022-03-25	4.42346
				2022-03-26	4.42242
				2022-03-27	4.42139
				2022-03-28	4.42035
				2022-03-29	4.41932
				2022-03-30	4.41828
				2022-03-31	4.41724
				2022-04-01	4.41621
				2022-04-02	4.41517
				2022-04-03	4.41414
				2022-04-04	4.4131
				2022-04-05	4.41207
				2022-04-06	4.41103
				2022-04-07	4.40999
				2022-04-08	4.40896
				2022-04-09	4.40792
				2022-04-10	4.40689
				2022-04-11	4.40585
				2022-04-12	4.40482
				2022-04-13	4.40378
				2022-04-14	4.40274
				2022-04-15	4.40171
				2022-04-16	4.39395
				2022-04-17	4.38619
				2022-04-18	4.37843
				2022-04-19	4.37067
				2022-04-20	4.36291
				2022-04-21	4.35515
				2022-04-22	4.34739
				2022-04-23	4.33963
				2022-04-24	4.33187
				2022-04-25	4.32411
				2022-04-26	4.31635
				2022-04-27	4.30859
				2022-04-28	4.30083
				2022-04-29	4.29307
				2022-04-30	4.28531
				2022-05-01	4.27755
				2022-05-02	4.2698
				2022-05-03	4.26204
				2022-05-04	4.25428
				2022-05-05	4.24652
				2022-05-06	4.23876
				2022-05-07	4.231
				2022-05-08	4.22324
				2022-05-09	4.21548
				2022-05-10	4.20772
				2022-05-11	4.19996
				2022-05-12	4.1922
				2022-05-13	4.18444
				2022-05-14	4.17668
				2022-05-15	4.16892
				2022-05-16	4.15453
				2022-05-17	4.14014
				2022-05-18	4.12576
				2022-05-19	4.11137
				2022-05-20	4.09698
				2022-05-21	4.08259
				2022-05-22	4.06821
				2022-05-23	4.05382
				2022-05-24	4.03943
				2022-05-25	4.02504
				2022-05-26	4.01066
				2022-05-27	3.99627
				2022-05-28	3.98188
				2022-05-29	3.96749
				2022-05-30	3.95311
				2022-05-31	3.93872
				2022-06-01	3.92433
				2022-06-02	3.90994
				2022-06-03	3.89556
				2022-06-04	3.88117
				2022-06-05	3.86678
				2022-06-06	3.85239
				2022-06-07	3.83801
				2022-06-08	3.82362
				2022-06-09	3.80923
				2022-06-10	3.79484
				2022-06-11	3.78046
				2022-06-12	3.76607
				2022-06-13	3.75168
				2022-06-14	3.73729
				2022-06-15	3.72291
				2022-06-16	3.70713
				2022-06-17	3.69135
				2022-06-18	3.67557
				2022-06-19	3.65979
				2022-06-20	3.64402
				2022-06-21	3.62824
				2022-06-22	3.61246
				2022-06-23	3.59668
				2022-06-24	3.58091
				2022-06-25	3.56513
				2022-06-26	3.54935
				2022-06-27	3.53357
				2022-06-28	3.5178
				2022-06-29	3.50202
				2022-06-30	3.48624
				2022-07-01	3.47046
				2022-07-02	3.45469
				2022-07-03	3.43891
				2022-07-04	3.42313
				2022-07-05	3.40735
				2022-07-06	3.39157
				2022-07-07	3.3758
				2022-07-08	3.36002
				2022-07-09	3.34424
				2022-07-10	3.32846
				2022-07-11	3.31269
				2022-07-12	3.29691
				2022-07-13	3.28113
				2022-07-14	3.26535
				2022-07-15	3.24958
[truncated: 143 more columns]

## Sheet: NE Iceland seasonal growth mode
	Growth curves (daily growth% of annual increment											AVERAGE														Cumulative seasonal growth curves											AVERAGE		growth increment width-based	isotope-based	isotope-based
Date	M071868-A3R yrx1	M071868-A3R yrx2	M071868-A3R yrx3	ICE06-6.2-A11R yr1	ICE06-6.2-A11R yr2	ICE06-6.2-A11R yr3	ICE06-6.2-A16R yr4	ICE06-6.2-A16R yr5	ICE06-6.2-A6R yr 3	ICE06-6.2-A6R yr 4	ICE06-6.2-A6R yr 5			WH241-572-RA6-A1R	Baltic Sea surface			ICE06-6.2-A11R	ICE06-6.2-A11R		date (start in middle of growth line)		%growth/day		Date	M071868-A3R yrx1	M071868-A3R yrx2	M071868-A3R yrx3	ICE06-6.2-A11R yr1	ICE06-6.2-A11R yr2	ICE06-6.2-A11R yr3	ICE06-6.2-A16R yr4	ICE06-6.2-A16R yr5	ICE06-6.2-A6R yr 3	ICE06-6.2-A6R yr 4	ICE06-6.2-A6R yr 5		preliminary version used in IOM	WH241-572-RA6-A1R	Baltic Sea surface	Nils summary revised
2020-10-15	0.0377491	0.0338754	0.0963196	0.0982416	0.100606	0.120881	0.293644	0.0836707	0.0743387	0.213311	0.136408	0.117186			0.24081		2020-10-15	0.0734738	0.0518686	0.0216105	2020-10-15	0.120881	0.109751		2020-10-15	0.0351349	0.0307352	0.0952333	0.0986886	0.0729251	0.109751	0.261433	0.083005	0.0578569	0.168451	0.137853	0.104642	0.061027		0.24081	0.176301
2020-10-16	0.0382338	0.0336198	0.0941677	0.0987994	0.101183	0.121879	0.275996	0.0838937	0.074791	0.208236	0.136489	0.115208			0.24081		2020-10-16	0.0746475	0.051962	0.0217261	2020-10-16	0.242759	0.220408		2020-10-16	0.0707208	0.0612384	0.188339	0.197937	0.146269	0.220408	0.507154	0.166231	0.116066	0.332895	0.275787	0.20755	0.122371		0.481619	0.342509
2020-10-17	0.0387185	0.0333643	0.0920157	0.0993572	0.101761	0.122877	0.258348	0.0841167	0.0752433	0.203162	0.136569	0.11323			0.223565		2020-10-17	0.0758212	0.0520554	0.0218418	2020-10-17	0.365637	0.331971		2020-10-17	0.106758	0.0915099	0.279317	0.297747	0.22003	0.331971	0.737163	0.249679	0.174627	0.493331	0.413802	0.308721	0.184031		0.705184	0.498626
2020-10-18	0.0392032	0.0331087	0.0898638	0.099915	0.102338	0.123876	0.240701	0.0843397	0.0756956	0.198087	0.13665	0.111252			0.223565		2020-10-18	0.0769948	0.0521489	0.0219575	2020-10-18	0.489513	0.444442		2020-10-18	0.143246	0.121549	0.368167	0.398116	0.294211	0.444442	0.95146	0.333347	0.23354	0.64976	0.551899	0.408158	0.246008		0.928749	0.64465
2020-10-19	0.0396879	0.0328532	0.0877119	0.100473	0.102915	0.124874	0.223053	0.0845627	0.076148	0.193012	0.13673	0.109275			0.223565		2020-10-19	0.0781685	0.0522423	0.0220732	2020-10-19	0.614387	0.557818		2020-10-19	0.180186	0.151357	0.45489	0.499046	0.368809	0.557818	1.15005	0.417237	0.292805	0.802181	0.690077	0.505859	0.308302		1.15231	1.04168
2020-10-20	0.0401726	0.0325976	0.08556	0.101031	0.103492	0.125873	0.205405	0.0847857	0.0766003	0.187937	0.136811	0.107297			0.223565		2020-10-20	0.0793422	0.0523357	0.0221889	2020-10-20	0.74026	0.672102		2020-10-20	0.217576	0.180933	0.539485	0.600536	0.443826	0.672102	1.33292	0.501348	0.352422	0.950595	0.828336	0.601825	0.370913		1.37588	1.42422
2020-10-21	0.0406573	0.0323421	0.083408	0.101588	0.104069	0.126871	0.187757	0.0850087	0.0770526	0.182862	0.136891	0.105319			0.223565		2020-10-21	0.0805159	0.0524291	0.0223046	2020-10-21	0.867131	0.787292		2020-10-21	0.255418	0.210277	0.621952	0.702587	0.519261	0.787292	1.50008	0.58568	0.412391	1.095	0.966677	0.696056	0.43384		1.59944	1.79227
2020-10-22	0.041142	0.0320865	0.0812561	0.102146	0.104646	0.12787	0.17011	0.0852317	0.0775049	0.177788	0.136972	0.103341			0.223565		2020-10-22	0.0816896	0.0525226	0.0224203	2020-10-22	0.995001	0.903388		2020-10-22	0.29371	0.239389	0.702292	0.805198	0.595115	0.903388	1.65153	0.670234	0.472713	1.2354	1.1051	0.788551	0.497084		1.82301	2.14583
2020-10-23	0.0416267	0.031831	0.0791042	0.102704	0.105224	0.128868	0.152462	0.0854547	0.0779573	0.172713	0.137052	0.101363			0.223565		2020-10-23	0.0828633	0.052616	0.022536	2020-10-23	1.12387	1.02039		2020-10-23	0.332454	0.268269	0.780503	0.908369	0.671387	1.02039	1.78727	0.755009	0.533386	1.37179	1.2436	0.879312	0.560645		2.04657	2.48489
2020-10-24	0.0421114	0.0315754	0.0769522	0.103262	0.105801	0.129867	0.134814	0.0856777	0.0784096	0.167638	0.137133	0.0993855			0.223565		2020-10-24	0.084037	0.0527094	0.0226517	2020-10-24	1.25374	1.1383		2020-10-24	0.371649	0.296918	0.856588	1.0121	0.748077	1.1383	1.90729	0.840005	0.594411	1.50417	1.38219	0.968337	0.624522		2.27014	2.80946
2020-10-25	0.0425961	0.0313199	0.0748003	0.10382	0.106378	0.130865	0.117166	0.0859006	0.0788619	0.162563	0.137213	0.0974076			0.223565		2020-10-25	0.0852107	0.0528029	0.0227673	2020-10-25	1.3846	1.25712		2020-10-25	0.411295	0.325334	0.930544	1.11639	0.825186	1.25712	2.01161	0.925222	0.655789	1.63255	1.52085	1.05563	0.688716		2.4937	3.11954
2020-10-26	0.0430807	0.0310643	0.0726484	0.104377	0.106955	0.131864	0.0995187	0.0861236	0.0793142	0.157488	0.137293	0.0954298			0.223565		2020-10-26	0.0863843	0.0528963	0.022883	2020-10-26	1.51647	1.37684		2020-10-26	0.451393	0.353519	1.00237	1.22124	0.902713	1.37684	2.10021	1.01066	0.717518	1.75692	1.6596	1.14118	0.753227		2.71727	3.41513
2020-10-27	0.0435654	0.0308088	0.0704964	0.104935	0.107532	0.132862	0.081871	0.0863466	0.0797666	0.152413	0.137374	0.093452			0.223565		2020-10-27	0.087558	0.0529897	0.0229987	2020-10-27	1.64933	1.49747		2020-10-27	0.491941	0.381472	1.07207	1.32666	0.980658	1.49747	2.1731	1.09632	0.779599	1.87728	1.79843	1.225	0.818054		2.94084	3.69622
2020-10-28	0.0440501	0.0305532	0.0683445	0.105493	0.108109	0.133861	0.0821171	0.0865696	0.0802189	0.147339	0.137454	0.0931009			0.223565		2020-10-28	0.0887317	0.0530831	0.0231144	2020-10-28	1.78319	1.619		2020-10-28	0.532941	0.409193	1.13965	1.43263	1.05902	1.619	2.24621	1.1822	0.842033	1.99363	1.93734	1.30853	0.883199		3.1644	3.96282
2020-10-29	0.0445348	0.0302977	0.0661926	0.106051	0.108687	0.134859	0.0823631	0.0867926	0.0806712	0.142264	0.137535	0.0927497			0.223565		2020-10-29	0.0899054	0.0531766	0.0232301	2020-10-29	1.91805	1.74145		2020-10-29	0.574391	0.436682	1.20509	1.53916	1.1378	1.74145	2.31954	1.2683	0.904818	2.10598	2.07633	1.39178	0.94866		3.38797	4.21493
2020-10-30	0.0450195	0.0300421	0.0640406	0.106608	0.109264	0.135858	0.0826092	0.0870156	0.0811236	0.137189	0.137615	0.0923986			0.223565		2020-10-30	0.0910791	0.05327	0.0233458	2020-10-30	2.0539	1.86479		2020-10-30	0.616293	0.463939	1.26841	1.64626	1.217	1.86479	2.39309	1.35463	0.967956	2.21431	2.2154	1.47473	1.01444		3.61153	4.45254
2020-10-31	0.0455042	0.0297866	0.0618887	0.107166	0.109841	0.136856	0.0828553	0.0872386	0.0815759	0.132114	0.137696	0.0920475			0.223565		2020-10-31	0.0922528	0.0533634	0.0234615	2020-10-31	2.19076	1.98905		2020-10-31	0.658646	0.490965	1.3296	1.75391	1.29662	1.98905	2.46685	1.44117	1.03145	2.31864	2.35456	1.55741	1.08053		3.8351	4.67566
2020-11-01	0.0459889	0.029531	0.0597368	0.107724	0.110418	0.137855	0.0831013	0.0874616	0.0820282	0.127039	0.137776	0.0916964			0.223565		2020-11-01	0.0934265	0.0534568	0.0235772	2020-11-01	2.32862	2.11421		2020-11-01	0.70145	0.517758	1.38867	1.86213	1.37666	2.11421	2.54084	1.52794	1.09529	2.41897	2.49379	1.63979	1.14694		4.05866	4.8843
2020-11-02	0.0464736	0.0292755	0.0620125	0.108282	0.110995	0.138853	0.0833474	0.0876846	0.0824805	0.121965	0.137857	0.0917478			0.223565		2020-11-02	0.0946002	0.0535503	0.0236929	2020-11-02	2.46747	2.24028		2020-11-02	0.744705	0.54432	1.44998	1.9709	1.45712	2.24028	2.61504	1.61492	1.15948	2.51528	2.63311	1.72228	1.21367		4.28223	5.07843
2020-11-03	0.0469583	0.0290199	0.0642881	0.10884	0.111572	0.139852	0.0835934	0.0879076	0.0829329	0.11689	0.137937	0.0917991			0.223565		2020-11-03	0.0957739	0.0536437	0.0238086	2020-11-03	2.60732	2.36725		2020-11-03	0.788411	0.57065	1.51354	2.08023	1.53799	2.36725	2.68947	1.70213	1.22403	2.60759	2.7725	1.80489	1.28072		4.50579	5.25808
2020-11-04	0.047443	0.0287644	0.0665638	0.109397	0.11215	0.14085	0.0838395	0.0881306	0.0833852	0.111815	0.138017	0.0918505			0.223565		2020-11-04	0.0969475	0.0537371	0.0239242	2020-11-04	2.74817	2.49514		2020-11-04	0.832569	0.596748	1.57936	2.19013	1.61928	2.49514	2.76411	1.78956	1.28892	2.69589	2.91198	1.88761	1.34808		4.72936	5.42323
2020-11-05	0.0479277	0.0285088	0.0688395	0.109955	0.112727	0.141848	0.0840856	0.0883536	0.0838375	0.10674	0.138098	0.0919019			0.223565		2020-11-05	0.0981212	0.0538306	0.0240399	2020-11-05	2.89002	2.62392		2020-11-05	0.877177	0.622614	1.64742	2.30059	1.70099	2.62392	2.83897	1.87721	1.35417	2.78018	3.05154	1.97044	1.41575		4.95292	5.57389
2020-11-06	0.0484124	0.0282533	0.0711152	0.110513	0.113304	0.142847	0.0843316	0.0885766	0.0842898	0.101665	0.138178	0.0919533			0.223565		2020-11-06	0.0992949	0.053924	0.0241556	2020-11-06	3.03287	2.75362		2020-11-06	0.922237	0.648248	1.71773	2.4116	1.78312	2.75362	2.91405	1.96508	1.41978	2.86047	3.19118	2.05337	1.48375		5.17649	5.71006
2020-11-07	0.0488971	0.0279977	0.0733909	0.111071	0.113881	0.143845	0.0845777	0.0887995	0.0847422	0.0965905	0.138259	0.0920047			0.223565		2020-11-07	0.100469	0.0540174	0.0242713	2020-11-07	3.17671	2.88422		2020-11-07	0.967748	0.67365	1.79029	2.52318	1.86567	2.88422	2.98935	2.05318	1.48573	2.93674	3.33091	2.13642	1.55206		5.40005	5.84717
2020-11-08	0.0493818	0.0277422	0.0756666	0.111629	0.114458	0.144844	0.0848238	0.0890225	0.0851945	0.0915157	0.138339	0.0920561			0.223565		2020-11-08	0.101642	0.0541108	0.024387	2020-11-08	3.32155	3.01573		2020-11-08	1.01371	0.698821	1.86511	2.63531	1.94864	3.01573	3.06487	2.14149	1.55204	3.00901	3.47071	2.21959	1.62069		5.62362	5.98522
2020-11-09	0.0498665	0.0274866	0.0779423	0.112186	0.115035	0.145842	0.0850698	0.0892455	0.0856468	0.0864409	0.13842	0.0921075			0.223565		2020-11-09	0.102816	0.0542043	0.0245027	2020-11-09	3.4674	3.14814		2020-11-09	1.06012	0.723759	1.94217	2.74801	2.03202	3.14814	3.14061	2.23003	1.61869	3.07728	3.6106	2.30286	1.68963		5.84718	6.12421
2020-11-10	0.0503512	0.0272311	0.0802179	0.112744	0.115613	0.146841	0.0853159	0.0894685	0.0860991	0.0813661	0.1385	0.0921589			0.223565		2020-11-10	0.10399	0.0542977	0.0246184	2020-11-10	3.61424	3.28146		2020-11-10	1.10699	0.748466	2.02148	2.86127	2.11582	3.28146	3.21657	2.31878	1.6857	3.14153	3.75056	2.38624	1.75889		6.07075	6.26415
2020-11-11	0.0508358	0.0269755	0.0824936	0.113302	0.11619	0.147839	0.085562	0.0896915	0.0865515	0.0818662	0.138581	0.0927171			0.223565		2020-11-11	0.105163	0.0543911	0.0247341	2020-11-11	3.76208	3.41569		2020-11-11	1.1543	0.772941	2.10305	2.97509	2.20004	3.41569	3.29274	2.40776	1.75307	3.20618	3.89061	2.47013	1.82847		6.29431	6.40502
2020-11-12	0.0513205	0.02672	0.0847693	0.11386	0.116767	0.148838	0.085808	0.0899145	0.0870038	0.0823663	0.138661	0.0932753			0.223565		2020-11-12	0.106337	0.0544846	0.0248498	2020-11-12	3.91091	3.55082		2020-11-12	1.20207	0.797184	2.18686	3.08946	2.28468	3.55082	3.36914	2.49696	1.82078	3.27123	4.03074	2.55454	1.89837		6.51788	6.54684
2020-11-13	0.0518052	0.0264644	0.087045	0.114418	0.117344	0.149836	0.0860541	0.0901375	0.0874561	0.0828664	0.138742	0.0938335			0.223565		2020-11-13	0.107511	0.054578	0.0249655	2020-11-13	4.06075	3.68686		2020-11-13	1.25029	0.821195	2.27292	3.2044	2.36974	3.68686	3.44575	2.58638	1.88885	3.33666	4.17095	2.63945	1.96858		6.74144	6.6896
2020-11-14	0.0522899	0.0262089	0.0893207	0.114975	0.117921	0.150835	0.0863001	0.0903605	0.0879084	0.0833665	0.138822	0.0943917			0.223565		2020-11-14	0.108684	0.0546714	0.0250811	2020-11-14	4.21159	3.82381		2020-11-14	1.29895	0.844975	2.36124	3.3199	2.45522	3.82381	3.52259	2.67602	1.95726	3.4025	4.31124	2.72488	2.03911		6.96501	6.83331
2020-11-15	0.0527746	0.0259533	0.0915964	0.115533	0.118498	0.151833	0.0865462	0.0905835	0.0883608	0.0838665	0.138902	0.0949499			0.223565		2020-11-15	0.109858	0.0547648	0.0251968	2020-11-15	4.36342	3.96166		2020-11-15	1.34807	0.868522	2.4518	3.43596	2.54111	3.96166	3.59964	2.76588	2.02603	3.46873	4.45162	2.81082	2.10995		7.18857	6.97795
2020-11-16	0.0532593	0.0256978	0.0938721	0.116091	0.119076	0.152832	0.0867923	0.0908065	0.0888131	0.0843666	0.138983	0.0955081			0.432639		2020-11-16	0.111032	0.0548583	0.0253125	2020-11-16	4.51625	4.10042		2020-11-16	1.39765	0.891838	2.54461	3.55258	2.62742	4.10042	3.67691	2.85597	2.09516	3.53535	4.59207	2.89727	2.18112		7.62121	7.12354
2020-11-17	0.053744	0.0254422	0.0961478	0.116649	0.119653	0.15383	0.0870383	0.0910295	0.0892654	0.0848667	0.139063	0.0960663			0.432639		2020-11-17	0.112205	0.0549517	0.0254282	2020-11-17	4.67008	4.24009		2020-11-17	1.44767	0.914922	2.63968	3.66976	2.71415	4.24009	3.7544	2.94627	2.16463	3.60237	4.73261	2.98423	2.25259		8.05385	7.27007
2020-11-18	0.0542287	0.0251867	0.0984234	0.117207	0.12023	0.154829	0.0872844	0.0912525	0.0897177	0.0853668	0.139144	0.0966245			0.432639		2020-11-18	0.113379	0.0550451	0.0255439	2020-11-18	4.82491	4.38066		2020-11-18	1.49814	0.937773	2.73699	3.7875	2.8013	4.38066	3.83211	3.0368	2.23446	3.66979	4.87322	3.0717	2.32439		8.48649	7.41754
2020-11-19	0.0547134	0.0249311	0.100699	0.117764	0.120807	0.155827	0.0875305	0.0914755	0.0901701	0.0858669	0.139224	0.0971827			0.432639		2020-11-19	0.114553	0.0551386	0.0256596	2020-11-19	4.98074	4.52214		2020-11-19	1.54906	0.960393	2.83655	3.9058	2.88887	4.52214	3.91004	3.12755	2.30464	3.73759	5.01392	3.15969	2.3965		8.91913	7.56595
2020-11-20	0.0551981	0.0246756	0.102975	0.118322	0.121384	0.156826	0.0877765	0.0916984	0.0906224	0.086367	0.139305	0.0977409			0.432639		2020-11-20	0.115727	0.055232	0.0257753	2020-11-20	5.13756	4.66453		2020-11-20	1.60044	0.982782	2.93837	4.02466	2.97686	4.66453	3.98819	3.21852	2.37517	3.8058	5.1547	3.24818	2.46893		9.35177	7.71531
2020-11-21	0.0556828	0.02442	0.105251	0.11888	0.121961	0.157824	0.0880226	0.0919214	0.0910747	0.0868671	0.139385	0.0982991			0.432639		2020-11-21	0.1169	0.0553254	0.025891	2020-11-21	5.29539	4.80782		2020-11-21	1.65227	1.00494	3.04243	4.14408	3.06526	4.80782	4.06655	3.30971	2.44605	3.8744	5.29556	3.33719	2.54167		9.78441	7.8656
2020-11-22	0.0561675	0.0250238	0.107526	0.119438	0.122539	0.158822	0.0882686	0.0921444	0.0915271	0.0873672	0.139466	0.0989354			0.432639		2020-11-22	0.118074	0.0554188	0.0260067	2020-11-22	5.45421	4.95202		2020-11-22	1.70454	1.02764	3.14874	4.26406	3.15409	4.95202	4.14514	3.40112	2.51728	3.94339	5.43651	3.42678	2.61474		10.217	8.01684
2020-11-23	0.0566522	0.0256276	0.109802	0.119996	0.123116	0.159821	0.0885147	0.0923674	0.0919794	0.0878673	0.139546	0.0995717			0.432639		2020-11-23	0.119248	0.0555123	0.0261224	2020-11-23	5.61403	5.09713		2020-11-23	1.75727	1.05089	3.25731	4.3846	3.24333	5.09713	4.22395	3.49275	2.58887	4.01278	5.57753	3.51695	2.68812		10.6497	8.16902
2020-11-24	0.0571369	0.0262314	0.112078	0.120553	0.123693	0.160819	0.0887608	0.0925904	0.0924317	0.0883673	0.139627	0.100208			0.432639		2020-11-24	0.120421	0.0556057	0.026238	2020-11-24	5.77485	5.24314		2020-11-24	1.81045	1.07469	3.36812	4.5057	3.33299	5.24314	4.30297	3.5846	2.66081	4.08256	5.71863	3.6077	2.76181		11.0823	8.32214
2020-11-25	0.0576216	0.0268352	0.114353	0.121111	0.12427	0.161818	0.0890068	0.0928134	0.092884	0.0888674	0.139707	0.100844			0.375403		2020-11-25	0.121595	0.0556991	0.0263537	2020-11-25	5.93667	5.39006		2020-11-25	1.86408	1.09904	3.48118	4.62737	3.42306	5.39006	4.38221	3.67668	2.7331	4.15274	5.85982	3.69903	2.83582		11.4577	8.47621
2020-11-26	0.0581063	0.027439	0.116629	0.121669	0.124847	0.162816	0.0892529	0.0930364	0.0933364	0.0893675	0.139787	0.101481			0.375403		2020-11-26	0.122769	0.0557926	0.0264694	2020-11-26	6.09948	5.53788		2020-11-26	1.91817	1.12394	3.5965	4.74959	3.51356	5.53788	4.46168	3.76897	2.80574	4.22331	6.00109	3.79095	2.91015		11.8331	8.63122
2020-11-27	0.0585909	0.0280428	0.118905	0.122227	0.125424	0.163815	0.089499	0.0932594	0.0937887	0.0898676	0.139868	0.102117			0.375403		2020-11-27	0.123942	0.055886	0.0265851	2020-11-27	6.2633	5.68661		2020-11-27	1.9727	1.14938	3.71406	4.87237	3.60447	5.68661	4.54136	3.86149	2.87874	4.29428	6.14244	3.88345	2.9848		12.2085	8.78716
2020-11-28	0.0590756	0.0286466	0.12118	0.122785	0.126002	0.164813	0.089745	0.0934824	0.094241	0.0903677	0.139948	0.102753			0.375403		2020-11-28	0.125116	0.0559794	0.0267008	2020-11-28	6.42811	5.83625		2020-11-28	2.02768	1.17537	3.83388	4.99571	3.69581	5.83625	4.62126	3.95423	2.95208	4.36565	6.28387	3.97653	3.05976		12.5839	8.94405
2020-11-29	0.0595603	0.0292504	0.123456	0.123342	0.126579	0.165812	0.0899911	0.0937054	0.0946933	0.0908678	0.140029	0.10339			0.375403		2020-11-29	0.12629	0.0560728	0.0268165	2020-11-29	6.59392	5.9868		2020-11-29	2.08312	1.20191	3.95594	5.11962	3.78756	5.9868	4.70138	4.04719	3.02578	4.4374	6.42538	4.07019	3.13504		12.9593	9.10189
2020-11-30	0.060045	0.0298542	0.125732	0.1239	0.127156	0.16681	0.0902372	0.0939284	0.0951457	0.0913679	0.140109	0.104026			0.473333		2020-11-30	0.127463	0.0561663	0.0269322	2020-11-30	6.76073	6.13825		2020-11-30	2.13901	1.229	4.08025	5.24408	3.87973	6.13825	4.78172	4.14037	3.09983	4.50956	6.56697	4.16443	3.21063		13.4327	9.26066
2020-12-01	0.0605297	0.0304579	0.128007	0.124458	0.127733	0.167809	0.0904832	0.0941514	0.095598	0.091868	0.14019	0.104662			0.473333		2020-12-01	0.128637	0.0562597	0.0270479	2020-12-01	6.92854	6.29061		2020-12-01	2.19534	1.25663	4.20682	5.36911	3.97232	6.29061	4.86227	4.23377	3.17423	4.5821	6.70864	4.25926	3.28655		13.906	9.42038
2020-12-02	0.0610144	0.0310617	0.127398	0.125016	0.12831	0.168807	0.0907293	0.0943743	0.0960503	0.0923681	0.14027	0.105036			0.473333		2020-12-02	0.129811	0.0563531	0.0271636	2020-12-02	7.09735	6.44387		2020-12-02	2.25213	1.28481	4.33278	5.49469	4.06532	6.44387	4.94305	4.3274	3.24899	4.65505	6.8504	4.35441	3.36278		14.3793	9.58104
2020-12-03	0.0614991	0.0316655	0.126788	0.125573	0.128887	0.169806	0.0909753	0.0945973	0.0965026	0.0928682	0.140351	0.10541			0.473333		2020-12-03	0.130985	0.0564466	0.0272793	2020-12-03	7.26716	6.59804		2020-12-03	2.30937	1.31354	4.45814	5.62084	4.15875	6.59804	5.02405	4.42124	3.3241	4.72839	6.99224	4.44988	3.43932		14.8527	9.74264
2020-12-04	0.0619838	0.0322693	0.126179	0.126131	0.129465	0.170804	0.0912214	0.0948203	0.096955	0.0933682	0.140431	0.105784			0.473333		2020-12-04	0.132158	0.05654	0.0273949	2020-12-04	7.43796	6.75312		2020-12-04	2.36706	1.34282	4.58289	5.74754	4.25259	6.75312	5.10526	4.51531	3.39956	4.80212	7.13415	4.54568	3.51619		15.326	9.90518
2020-12-05	0.0624685	0.0328731	0.125569	0.126689	0.130042	0.171803	0.0914675	0.0950433	0.0974073	0.0938683	0.140511	0.106158			0.424245		2020-12-05	0.133332	0.0566334	0.0275106	2020-12-05	7.60976	6.9091		2020-12-05	2.42521	1.37265	4.70704	5.87481	4.34685	6.9091	5.1867	4.60959	3.47537	4.87625	7.27615	4.64179	3.59336		15.7503	10.0687
2020-12-06	0.0629532	0.0334769	0.12496	0.127247	0.130619	0.172801	0.0917135	0.0952663	0.0978596	0.0943684	0.140592	0.106532			0.424245		2020-12-06	0.134506	0.0567268	0.0276263	2020-12-06	7.78256	7.06599		2020-12-06	2.4838	1.40302	4.83059	6.00263	4.44153	7.06599	5.26835	4.7041	3.55153	4.95077	7.41823	4.73823	3.67086		16.1745	10.2331
2020-12-07	0.0634379	0.0340807	0.12435	0.127805	0.131196	0.1738	0.0919596	0.0954893	0.0983119	0.0948685	0.140672	0.106906			0.424245		2020-12-07	0.135679	0.0568203	0.027742	2020-12-07	7.95636	7.22379		2020-12-07	2.54284	1.43394	4.95354	6.13102	4.53663	7.22379	5.35022	4.79883	3.62804	5.02569	7.5604	4.835	3.74867		16.5987	10.3985
2020-12-08	0.0639226	0.0346845	0.12374	0.128362	0.131773	0.174798	0.0922057	0.0957123	0.0987643	0.0953686	0.140753	0.10728			0.424245		2020-12-08	0.136853	0.0569137	0.0278577	2020-12-08	8.13116	7.3825		2020-12-08	2.60234	1.46541	5.07589	6.25996	4.63215	7.3825	5.43231	4.89378	3.70491	5.101	7.70264	4.93208	3.8268		17.023	10.5648
2020-12-09	0.0644073	0.0352883	0.123131	0.12892	0.13235	0.175797	0.0924517	0.0959353	0.0992166	0.0958687	0.140833	0.107654			0.424245		2020-12-09	0.138027	0.0570071	0.0279734	2020-12-09	8.30696	7.54211		2020-12-09	2.66229	1.49743	5.19763	6.38947	4.72808	7.54211	5.51462	4.98895	3.78213	5.17671	7.84496	5.02949	3.90525		17.4472	10.732
2020-12-10	0.064892	0.0358921	0.122521	0.129478	0.132928	0.176795	0.0926978	0.0961583	0.0996689	0.0963688	0.140914	0.108028			0.41942		2020-12-10	0.1392	0.0571006	0.0280891	2020-12-10	8.48375	7.70262		2020-12-10	2.72269	1.52999	5.31877	6.51954	4.82444	7.70262	5.59715	5.08435	3.8597	5.25281	7.98737	5.12722	3.98401		17.8666	10.9002
2020-12-11	0.0653767	0.0364959	0.121912	0.130036	0.133505	0.177793	0.0929439	0.0963813	0.100121	0.0968689	0.140994	0.108403			0.41942		2020-12-11	0.140374	0.057194	0.0282048	2020-12-11	8.66155	7.86405		2020-12-11	2.78353	1.56311	5.4393	6.65017	4.92121	7.86405	5.6799	5.17996	3.93762	5.3293	8.12986	5.22527	4.06309		18.2861	11.0693
2020-12-12	0.0658614	0.0370997	0.121302	0.130594	0.134082	0.178792	0.0931899	0.0966043	0.100574	0.097369	0.141075	0.108777			0.41942		2020-12-12	0.141548	0.0572874	0.0283205	2020-12-12	8.84034	8.02638		2020-12-12	2.84483	1.59677	5.55924	6.78135	5.0184	8.02638	5.76287	5.2758	4.0159	5.4062	8.27242	5.32365	4.14249		18.7055	11.2394
2020-12-13	0.066346	0.0377034	0.120693	0.131151	0.134659	0.17979	0.093436	0.0968273	0.101026	0.0978691	0.141155	0.109151			0.41942		2020-12-13	0.142721	0.0573808	0.0284362	2020-12-13	9.02013	8.18961		2020-12-13	2.90659	1.63098	5.67857	6.9131	5.11601	8.18961	5.84606	5.37185	4.09453	5.48348	8.41507	5.42235	4.2222		19.1249	11.4104
2020-12-14	0.0668307	0.0383072	0.120083	0.131709	0.135236	0.180789	0.093682	0.0970503	0.101478	0.0983691	0.141236	0.109525			0.41942		2020-12-14	0.143895	0.0574743	0.0285518	2020-12-14	9.20092	8.35376		2020-12-14	2.96879	1.66573	5.7973	7.04541	5.21403	8.35376	5.92946	5.46813	4.17351	5.56117	8.55781	5.52137	4.30223		19.5443	11.5824
2020-12-15	0.0673154	0.038911	0.119474	0.132267	0.135813	0.181787	0.0939281	0.0972732	0.101931	0.0988692	0.141316	0.109899			0.562761		2020-12-15	0.145069	0.0575677	0.0286675	2020-12-15	9.3827	8.5188		2020-12-15	3.03144	1.70104	5.91542	7.17828	5.31248	8.5188	6.01309	5.56463	4.25284	5.63924	8.70062	5.62072	4.38258		20.1071	11.7553
2020-12-16	0.0678001	0.0395148	0.12237	0.132825	0.136391	0.182786	0.0941742	0.0974962	0.102383	0.0993693	0.141653	0.110615			0.41083		2020-12-16	0.144995	0.0576611	0.0287832	2020-12-16	9.56549	8.68476		2020-12-16	3.09455	1.73689	6.03641	7.31171	5.41134	8.68476	6.09693	5.66135	4.33252	5.71771	8.84377	5.72072	4.46324		20.5179	11.9292
2020-12-17	0.0682848	0.0401186	0.125266	0.133383	0.136968	0.183784	0.0944202	0.0977192	0.102835	0.0998694	0.14199	0.111331			0.41083		2020-12-17	0.144922	0.0577546	0.0288989	2020-12-17	9.74927	8.85162		2020-12-17	3.1581	1.77329	6.16027	7.4457	5.51062	8.85162	6.18099	5.75829	4.41256	5.79658	8.98726	5.82139	4.54422		20.9288	12.1039
2020-12-18	0.0687695	0.0407224	0.128163	0.13394	0.137545	0.184783	0.0946663	0.0979422	0.103288	0.10037	0.142328	0.112047			0.41083		2020-12-18	0.144848	0.057848	0.0290146	2020-12-18	9.93406	9.01939		2020-12-18	3.22211	1.81023	6.28698	7.58025	5.61032	9.01939	6.26527	5.85546	4.49294	5.87584	9.1311	5.92272	4.62552		21.3396	12.2797
2020-12-19	0.0692542	0.0413262	0.131059	0.134498	0.138122	0.185781	0.0949124	0.0981652	0.10374	0.10087	0.142665	0.112763			0.41083		2020-12-19	0.144775	0.0579414	0.0291303	2020-12-19	10.1198	9.18807		2020-12-19	3.28657	1.84773	6.41657	7.71536	5.71044	9.18807	6.34978	5.95284	4.57368	5.9555	9.27527	6.02471	4.70713		21.7504	12.4563
2020-12-20	0.0697389	0.04193	0.133955	0.135056	0.138699	0.18678	0.0951584	0.0983882	0.104192	0.10137	0.143002	0.113479			0.41083		2020-12-20	0.144702	0.0580348	0.029246	2020-12-20	10.3066	9.35765		2020-12-20	3.35148	1.88577	6.54901	7.85103	5.81098	9.35765	6.4345	6.05045	4.65478	6.03555	9.41979	6.12736	4.78906		22.1612	12.634
2020-12-21	0.0702236	0.0425338	0.136852	0.135614	0.139276	0.187778	0.0954045	0.0986112	0.104645	0.10187	0.143339	0.114195			0.505112		2020-12-21	0.144628	0.0581283	0.0293617	2020-12-21	10.4944	9.52814		2020-12-21	3.41684	1.92436	6.68432	7.98726	5.91194	9.52814	6.51944	6.14827	4.73622	6.116	9.56465	6.23068	4.87131		22.6664	12.8125
2020-12-22	0.0707083	0.0431376	0.139748	0.136172	0.139854	0.188777	0.0956505	0.0988342	0.105097	0.10237	0.143676	0.114911			0.505112		2020-12-22	0.144555	0.0582217	0.0294774	2020-12-22	10.6832	9.69954		2020-12-22	3.48265	1.9635	6.82249	8.12405	6.01331	9.69954	6.60459	6.24632	4.81802	6.19684	9.70984	6.33465	4.95387		23.1715	12.992
2020-12-23	0.071193	0.0437414	0.142644	0.136729	0.140431	0.189775	0.0958966	0.0990572	0.105549	0.10287	0.144014	0.115627			0.505112		2020-12-23	0.144481	0.0583151	0.0295931	2020-12-23	10.8729	9.87184		2020-12-23	3.54891	2.00319	6.96352	8.2614	6.1151	9.87184	6.68997	6.34459	4.90016	6.27807	9.85538	6.43929	5.03675		23.6766	13.1725
2020-12-24	0.0716777	0.0443452	0.14554	0.137287	0.141008	0.190774	0.0961427	0.0992802	0.106001	0.10337	0.144351	0.116343			0.505112		2020-12-24	0.144408	0.0584086	0.0297087	2020-12-24	11.0637	10.045		2020-12-24	3.61563	2.04342	7.10742	8.39931	6.21731	10.045	6.77557	6.44308	4.98266	6.3597	10.0013	6.54458	5.11995		24.1817	13.3538
2020-12-25	0.0721624	0.0449489	0.148437	0.137845	0.141585	0.191772	0.0963887	0.0995032	0.106454	0.10387	0.144688	0.117059			0.592996		2020-12-25	0.144334	0.058502	0.0298244	2020-12-25	11.2555	10.2192		2020-12-25	3.68279	2.08421	7.25419	8.53779	6.31994	10.2192	6.86138	6.54179	5.06551	6.44173	10.1475	6.65054	5.20346		24.7747	13.5362
2020-12-26	0.0726471	0.0455527	0.151333	0.138403	0.142162	0.192771	0.0966348	0.0997262	0.106906	0.10437	0.145025	0.117776			0.549216		2020-12-26	0.144261	0.0585954	0.0299401	2020-12-26	11.4483	10.3942		2020-12-26	3.75041	2.12554	7.40381	8.67682	6.42299	10.3942	6.94742	6.64072	5.14872	6.52415	10.294	6.75716	5.28729		25.3239	13.7194
2020-12-27	0.0731318	0.0461565	0.154229	0.138961	0.142739	0.193769	0.0968809	0.0999492	0.107358	0.10487	0.145362	0.118492			0.549216		2020-12-27	0.144187	0.0586888	0.0300558	2020-12-27	11.642	10.5701		2020-12-27	3.81847	2.16741	7.5563	8.81641	6.52645	10.5701	7.03367	6.73988	5.23227	6.60697	10.4409	6.86445	5.37144		25.8731	13.9036
2020-12-28	0.0736165	0.0467603	0.157126	0.139518	0.143317	0.194768	0.0971269	0.100172	0.107811	0.10537	0.1457	0.119208			0.549216		2020-12-28	0.144114	0.0587823	0.0301715	2020-12-28	11.8368	10.7469		2020-12-28	3.88699	2.20984	7.71166	8.95656	6.63034	10.7469	7.12014	6.83925	5.31618	6.69018	10.5882	6.97239	5.4559		26.4223	14.0888
2020-12-29	0.0741011	0.0473641	0.160022	0.140076	0.143894	0.195766	0.097373	0.100395	0.108263	0.10587	0.146037	0.119924			0.549216		2020-12-29	0.144041	0.0588757	0.0302872	2020-12-29	12.0326	10.9247		2020-12-29	3.95596	2.25281	7.86987	9.09728	6.73464	10.9247	7.20684	6.93885	5.40044	6.77378	10.7358	7.08099	5.54068		26.9715	14.2749
2020-12-30	0.0747852	0.0479679	0.162918	0.140634	0.144471	0.196764	0.0976191	0.100618	0.108715	0.106371	0.146374	0.120658			0.549216		2020-12-30	0.143967	0.0589691	0.030731	2020-12-30	12.2293	11.1033		2020-12-30	4.02557	2.29633	8.03095	9.23855	6.83936	11.1033	7.29375	7.03867	5.48505	6.85778	10.8837	7.19028	5.62578		27.5208	14.4619
2020-12-31	0.0758921	0.0485717	0.1644	0.141192	0.145048	0.197763	0.0978651	0.100841	0.109168	0.106871	0.146711	0.121302			0.513845		2020-12-31	0.143894	0.0590626	0.0318708	2020-12-31	12.4271	11.2829		2020-12-31	4.0962	2.3404	8.1935	9.38039	6.9445	11.2829	7.38088	7.13871	5.57002	6.94218	11.032	7.30015	5.71119		28.0346	14.6499
2021-01-01	0.076999	0.0491755	0.165881	0.141749	0.145625	0.198761	0.0981112	0.101064	0.10962	0.107371	0.147048	0.121946			0.513845		2021-01-01	0.14382	0.059156	0.0330106	2021-01-01	12.6259	11.4633		2021-01-01	4.16787	2.38502	8.35751	9.52278	7.05006	11.4633	7.46823	7.23897	5.65533	7.02697	11.1806	7.4106	5.79692		28.5485	14.8388
2021-01-02	0.0781059	0.0497793	0.167362	0.142307	0.146202	0.19976	0.0983572	0.101287	0.110072	0.107871	0.147386	0.12259			0.513845		2021-01-02	0.143747	0.0592494	0.0341504	2021-01-02	12.8256	11.6447		2021-01-02	4.24057	2.43019	8.52298	9.66574	7.15603	11.6447	7.55579	7.33945	5.741	7.11216	11.3295	7.52165	5.88297		29.0623	15.0287
2021-01-03	0.0792128	0.0503831	0.168843	0.142865	0.14678	0.200758	0.0986033	0.10151	0.110525	0.108371	0.147723	0.123234			0.513845		2021-01-03	0.143673	0.0593428	0.0352902	2021-01-03	13.0264	11.827		2021-01-03	4.31429	2.4759	8.68992	9.80925	7.26243	11.827	7.64358	7.44015	5.82702	7.19774	11.4788	7.63328	5.96934		29.5761	15.2195
2021-01-04	0.0803197	0.0509869	0.170324	0.143423	0.147357	0.201757	0.0988494	0.101733	0.110977	0.108871	0.14806	0.123878			0.513845		2021-01-04	0.1436	0.0594363	0.03643	2021-01-04	13.2281	12.0102		2021-01-04	4.38905	2.52216	8.85833	9.95333	7.36924	12.0102	7.73159	7.54107	5.91339	7.28371	11.6284	7.7455	6.05602		30.09	15.4112
2021-01-05	0.0814266	0.0515907	0.171805	0.143981	0.147934	0.202755	0.0990954	0.101956	0.111429	0.109371	0.148397	0.124522			0.513845		2021-01-05	0.143526	0.0595297	0.0375697	2021-01-05	13.4309	12.1943		2021-01-05	4.46484	2.56897	9.02819	10.098	7.47647	12.1943	7.81981	7.64222	6.00012	7.37008	11.7784	7.8583	6.14301		30.6038	15.6039
2021-01-06	0.0825335	0.0521944	0.173286	0.144538	0.148511	0.203754	0.0993415	0.102179	0.111882	0.109871	0.148734	0.125166			0.513845		2021-01-06	0.143453	0.0596231	0.0387095	2021-01-06	13.6346	12.3793		2021-01-06	4.54166	2.61632	9.19952	10.2432	7.58412	12.3793	7.90826	7.74358	6.0872	7.45685	11.9287	7.97169	6.23033		31.1177	15.7975
2021-01-07	0.0836405	0.0527982	0.174767	0.145096	0.149088	0.204752	0.0995876	0.102402	0.112334	0.110371	0.149072	0.12581			0.513845		2021-01-07	0.14338	0.0597166	0.0398493	2021-01-07	13.8394	12.5652		2021-01-07	4.6195	2.66423	9.37232	10.3889	7.69219	12.5652	7.99692	7.84517	6.17462	7.54401	12.0794	8.08567	6.31796		31.6315	15.9921
2021-01-08	0.0847474	0.053402	0.176248	0.145654	0.149665	0.205751	0.0998336	0.102625	0.112786	0.110871	0.149409	0.126454			0.513845		2021-01-08	0.143306	0.05981	0.0409891	2021-01-08	14.0451	12.752		2021-01-08	4.69838	2.71268	9.54658	10.5352	7.80067	12.752	8.0858	7.94698	6.2624	7.63156	12.2303	8.20024	6.40591		32.1454	16.1876
2021-01-09	0.0858543	0.0540058	0.177729	0.146212	0.150243	0.206749	0.10008	0.102848	0.113239	0.111371	0.149746	0.127098			0.356619		2021-01-09	0.143233	0.0599034	0.0421289	2021-01-09	14.2519	12.9397		2021-01-09	4.77829	2.76168	9.7223	10.6821	7.90958	12.9397	8.1749	8.04901	6.35054	7.71951	12.3817	8.31539	6.49417		32.502	16.384
2021-01-10	0.0869612	0.0546096	0.17921	0.14677	0.15082	0.207748	0.100326	0.103071	0.113691	0.111872	0.150083	0.127742			0.356619		2021-01-10	0.143159	0.0599968	0.0432687	2021-01-10	14.4596	13.1283		2021-01-10	4.85923	2.81123	9.89949	10.8295	8.0189	13.1283	8.26422	8.15126	6.43902	7.80786	12.5333	8.43113	6.58275		32.8586	16.5814
2021-01-11	0.0880681	0.0552134	0.17921	0.147327	0.151397	0.208746	0.100572	0.103294	0.114143	0.112372	0.15042	0.128251			0.356619		2021-01-11	0.143086	0.0600903	0.0444085	2021-01-11	14.6684	13.3178		2021-01-11	4.9412	2.86132	10.0767	10.9775	8.12864	13.3178	8.35376	8.25373	6.52786	7.8966	12.6854	8.54732	6.67165		33.2152	16.7798
2021-01-12	0.089175	0.0558172	0.17921	0.147885	0.151974	0.209745	0.100818	0.103517	0.114596	0.112872	0.150758	0.128761			0.356619		2021-01-12	0.143012	0.0601837	0.0455483	2021-01-12	14.8781	13.5082		2021-01-12	5.0242	2.91196	10.2539	11.1261	8.2388	13.5082	8.44352	8.35643	6.61705	7.98573	12.8377	8.66397	6.76086		33.5718	16.9791
2021-01-13	0.0902819	0.056421	0.17921	0.148443	0.152551	0.210743	0.101064	0.10374	0.115048	0.113372	0.151095	0.12927			0.323549		2021-01-13	0.142939	0.0602771	0.0466881	2021-01-13	15.0889	13.6996		2021-01-13	5.10823	2.96315	10.4311	11.2752	8.34938	13.6996	8.5335	8.45934	6.70659	8.07526	12.9904	8.78107	6.85039		33.8954	17.1793
2021-01-14	0.0913888	0.0570248	0.17921	0.149001	0.153128	0.211742	0.10131	0.103963	0.1155	0.113872	0.151432	0.129779			0.323549		2021-01-14	0.142866	0.0603705	0.0478279	2021-01-14	15.3006	13.8918		2021-01-14	5.19329	3.01489	10.6082	11.4249	8.46037	13.8918	8.6237	8.56248	6.79648	8.16518	13.1434	8.89862	6.94024		34.2189	17.3804
2021-01-15	0.0924957	0.0576286	0.17921	0.149559	0.153706	0.21274	0.101556	0.104186	0.115953	0.114372	0.151769	0.130289			0.346337		2021-01-15	0.142792	0.060464	0.0489676	2021-01-15	15.5134	14.085		2021-01-15	5.27938	3.06718	10.7854	11.5751	8.57179	14.085	8.71411	8.66583	6.88672	8.2555	13.2968	9.01663	7.03041		34.5653	17.5825
2021-01-16	0.0936026	0.0582324	0.17921	0.150116	0.154283	0.213261	0.101802	0.104409	0.116405	0.114872	0.152106	0.130755			0.346337		2021-01-16	0.142719	0.0605574	0.0501074	2021-01-16	15.7266	14.2786		2021-01-16	5.3665	3.12001	10.9626	11.7259	8.68362	14.2786	8.80475	8.76941	6.97732	8.34622	13.4505	9.13505	7.12275		34.9116	17.7856
2021-01-17	0.0947095	0.0588362	0.17921	0.150674	0.15486	0.213783	0.102048	0.104632	0.116857	0.115372	0.152444	0.131221		0.0566752	0.346337		2021-01-17	0.142645	0.0606508	0.0512472	2021-01-17	15.9404	14.4727		2021-01-17	5.45465	3.1734	11.1398	11.8773	8.79587	14.4727	8.8956	8.87321	7.06827	8.43733	13.6046	9.25389	7.21727	0.0566752	35.258	17.9896
2021-01-18	0.0958164	0.0594399	0.17921	0.151232	0.155437	0.214304	0.102294	0.104855	0.11731	0.115872	0.152781	0.131687		0.0807719	0.346337		2021-01-18	0.142572	0.0607443	0.052387	2021-01-18	16.1547	14.6673		2021-01-18	5.54383	3.22733	11.317	12.0292	8.90854	14.6673	8.98668	8.97723	7.15957	8.52883	13.759	9.37314	7.31396	0.137447	35.6043	18.1945
2021-01-19	0.0969233	0.0600437	0.17921	0.15179	0.156014	0.214825	0.10254	0.105078	0.117762	0.116372	0.153118	0.132152		0.162524	0.346337		2021-01-19	0.142498	0.0608377	0.0535268	2021-01-19	16.3695	14.8623		2021-01-19	5.63404	3.2818	11.4942	12.1817	9.02163	14.8623	9.07797	9.08147	7.25122	8.62073	13.9137	9.4928	7.41283	0.299971	35.9506	18.4004
2021-01-20	0.0980302	0.0606475	0.17921	0.152348	0.156591	0.215347	0.102786	0.105301	0.118214	0.116872	0.153455	0.132618		0.154634	0.346337		2021-01-20	0.142425	0.0609311	0.0546666	2021-01-20	16.5849	15.0578		2021-01-20	5.72528	3.33683	11.6714	12.3347	9.13514	15.0578	9.16948	9.18594	7.34323	8.71302	14.0688	9.61288	7.51388	0.454605	36.297	18.6072
2021-01-21	0.0991371	0.0612513	0.177581	0.152905	0.157168	0.215868	0.103032	0.105524	0.118667	0.117373	0.153792	0.132936		0.125343	0.346337		2021-01-21	0.142351	0.0610245	0.0558064	2021-01-21	16.8007	15.2538		2021-01-21	5.81755	3.3924	11.847	12.4883	9.24906	15.2538	9.26121	9.29062	7.43558	8.80571	14.2242	9.73323	7.61711	0.579948	36.6433	18.815
2021-01-22	0.100244	0.0618551	0.175952	0.153463	0.157746	0.216389	0.103279	0.105747	0.119119	0.117873	0.15413	0.133254		0.254294	0.346337		2021-01-22	0.142278	0.061118	0.0569462	2021-01-22	17.0171	15.4503		2021-01-22	5.91086	3.44852	12.0209	12.6425	9.3634	15.4503	9.35316	9.39553	7.52829	8.8988	14.38	9.85384	7.72251	0.834243	36.9896	19.0237
2021-01-23	0.101351	0.0624589	0.174323	0.154021	0.158323	0.21691	0.103525	0.10597	0.119571	0.118373	0.154467	0.133572		0.227981	0.346337		2021-01-23	0.142205	0.0612114	0.058086	2021-01-23	17.234	15.6472		2021-01-23	6.00519	3.50519	12.1933	12.7972	9.47816	15.6472	9.44533	9.50065	7.62135	8.99228	14.5361	9.97473	7.83009	1.06222	37.336	19.2333
2021-01-24	0.102458	0.0630627	0.172694	0.154579	0.1589	0.217432	0.103771	0.106193	0.120024	0.118873	0.154804	0.13389		0.280094	0.346149		2021-01-24	0.142131	0.0613048	0.0592257	2021-01-24	17.4515	15.8447		2021-01-24	6.10055	3.56241	12.364	12.9525	9.59334	15.8447	9.53772	9.606	7.71477	9.08615	14.6925	10.0959	7.93985	1.34232	37.6821	19.4439
2021-01-25	0.103565	0.0636665	0.171064	0.155137	0.159477	0.217953	0.104017	0.106416	0.120476	0.119373	0.155141	0.134208		0.286391	0.346149		2021-01-25	0.142058	0.0613983	0.0603655	2021-01-25	17.6694	16.0425		2021-01-25	6.19694	3.62017	12.5332	13.1083	9.70894	16.0425	9.63032	9.71157	7.80853	9.18042	14.8493	10.2173	8.05178	1.62871	38.0283	19.6554
2021-01-26	0.104672	0.0642703	0.169435	0.155694	0.160054	0.218474	0.104263	0.106639	0.120928	0.119873	0.155479	0.134526		0.27955	0.478491		2021-01-26	0.141984	0.0614917	0.0615053	2021-01-26	17.8879	16.2409		2021-01-26	6.29436	3.67849	12.7007	13.2647	9.82496	16.2409	9.72315	9.81736	7.90265	9.27508	15.0065	10.339	8.16589	1.90826	38.5068	19.8679
2021-01-27	0.105779	0.0648741	0.167806	0.156252	0.160631	0.218996	0.104509	0.106862	0.121381	0.120373	0.155816	0.134843		0.195594	0.478491		2021-01-27	0.141911	0.0615851	0.0626451	2021-01-27	18.1069	16.4397		2021-01-27	6.39282	3.73735	12.8666	13.4217	9.94139	16.4397	9.81619	9.92337	7.99712	9.37014	15.1639	10.4609	8.28217	2.10385	38.9853	20.0813
2021-01-28	0.106885	0.0654779	0.166177	0.15681	0.161209	0.219517	0.104755	0.107085	0.121833	0.120873	0.156153	0.135161		0.207347	0.478491		2021-01-28	0.141837	0.0616785	0.0637849	2021-01-28	18.3264	16.639		2021-01-28	6.4923	3.79676	13.0309	13.5792	10.0582	16.639	9.90946	10.0296	8.09194	9.46559	15.3217	10.5832	8.40064	2.3112	39.4637	20.2956
2021-01-29	0.107992	0.0660817	0.164548	0.157368	0.161786	0.220038	0.105001	0.107308	0.122285	0.121373	0.15649	0.135479		0.280074	0.478491		2021-01-29	0.141764	0.061772	0.0649247	2021-01-29	18.5465	16.8388		2021-01-29	6.59281	3.85671	13.1936	13.7373	10.1755	16.8388	10.0029	10.1361	8.18711	9.56144	15.4799	10.7057	8.52128	2.59127	39.9422	20.5109
2021-01-30	0.109099	0.0666855	0.162918	0.157926	0.162363	0.22056	0.105247	0.107531	0.122738	0.121873	0.156827	0.135797		0.182996	0.478491		2021-01-30	0.14169	0.0618654	0.0660645	2021-01-30	18.767	17.0391		2021-01-30	6.69436	3.91722	13.3547	13.896	10.2932	17.0391	10.0966	10.2427	8.28264	9.65768	15.6384	10.8284	8.6441	2.77427	40.4207	20.7271
2021-01-31	0.110206	0.0672892	0.156682	0.158483	0.16294	0.221081	0.105493	0.107754	0.12319	0.122373	0.157165	0.135696		0.251503	0.478491		2021-01-31	0.141617	0.0619588	0.0672043	2021-01-31	18.9881	17.2398		2021-01-31	6.79693	3.97827	13.5096	14.0552	10.4113	17.2398	10.1906	10.3496	8.37852	9.75432	15.7972	10.951	8.76909	3.02577	40.8992	20.9443
2021-02-01	0.111313	0.067893	0.150446	0.159041	0.163517	0.221602	0.105739	0.107977	0.123642	0.122874	0.157502	0.135595		0.179607	0.478491		2021-02-01	0.141544	0.0620523	0.0683441	2021-02-01	19.2097	17.441		2021-02-01	6.90054	4.03987	13.6583	14.2149	10.5298	17.441	10.2847	10.4567	8.47474	9.85135	15.9564	11.0735	8.89626	3.20538	41.3777	21.1624
2021-02-02	0.11242	0.0684968	0.14421	0.159599	0.164094	0.222123	0.105985	0.1082	0.124095	0.123374	0.157839	0.135494		0.231859	0.478491		2021-02-02	0.14147	0.0621457	0.0694839	2021-02-02	19.4318	17.6427		2021-02-02	7.00517	4.10201	13.8009	14.3753	10.6488	17.6427	10.3791	10.5641	8.57133	9.94878	16.1159	11.1958	9.02561	3.43724	41.8562	21.3815
2021-02-03	0.113527	0.0691006	0.137974	0.160157	0.164672	0.222645	0.106231	0.108423	0.124547	0.123874	0.158176	0.135393		0.268999	0.478491		2021-02-03	0.141397	0.0622391	0.0706236	2021-02-03	19.6545	17.8448		2021-02-03	7.11084	4.16471	13.9373	14.5361	10.7682	17.8448	10.4736	10.6716	8.66826	10.0466	16.2757	11.318	9.15713	3.70624	42.3347	21.6015
2021-02-04	0.114634	0.0697044	0.131738	0.160714	0.165249	0.223166	0.106477	0.108646	0.124999	0.124374	0.158513	0.135292		0.297404	0.493977		2021-02-04	0.141323	0.0623325	0.0717634	2021-02-04	19.8776	18.0474		2021-02-04	7.21753	4.22795	14.0676	14.6976	10.8879	18.0474	10.5684	10.7794	8.76554	10.1448	16.4359	11.44	9.29083	4.00364	42.8287	21.8224
2021-02-05	0.115741	0.0703082	0.125502	0.161272	0.165826	0.223687	0.106723	0.108869	0.125452	0.124874	0.158851	0.135191		0.229895	0.407829		2021-02-05	0.14125	0.062426	0.0729032	2021-02-05	20.1013	18.2505		2021-02-05	7.32526	4.29174	14.1917	14.8596	11.0081	18.2505	10.6635	10.8874	8.86318	10.2434	16.5964	11.5619	9.42671	4.23354	43.2365	22.0443
2021-02-06	0.114909	0.070912	0.119266	0.16183	0.166403	0.224209	0.106969	0.109092	0.125904	0.125374	0.159188	0.134914		0.279263	0.407829		2021-02-06	0.141176	0.0625194	0.0745892	2021-02-06	20.3255	18.4541		2021-02-06	7.43221	4.35608	14.3096	15.0222	11.1288	18.4541	10.7587	10.9957	8.96117	10.3424	16.7573	11.6835	9.56477	4.5128	43.6443	22.2672
2021-02-07	0.114078	0.0715158	0.11303	0.162388	0.16698	0.22473	0.107216	0.109315	0.126356	0.125874	0.159525	0.134637		0.37409	0.407829		2021-02-07	0.141103	0.0626128	0.0762751	2021-02-07	20.5503	18.6581		2021-02-07	7.53839	4.42097	14.4214	15.1853	11.2498	18.6581	10.8541	11.1041	9.05951	10.4418	16.9185	11.8047	9.705	4.88689	44.0522	22.4909
2021-02-08	0.113246	0.0721196	0.106793	0.162946	0.167557	0.225251	0.107462	0.109538	0.126808	0.126374	0.159862	0.13436		0.208089	0.407829		2021-02-08	0.141029	0.0627063	0.077961	2021-02-08	20.7755	18.8626		2021-02-08	7.64379	4.4864	14.5269	15.349	11.3712	18.8626	10.9498	11.2128	9.15821	10.5416	17.0801	11.9257	9.84741	5.09498	44.46	22.7156
2021-02-09	0.112415	0.0727234	0.100557	0.163503	0.168135	0.225773	0.107708	0.109761	0.127261	0.126874	0.160199	0.134083		0.205503	0.407829		2021-02-09	0.140956	0.0627997	0.079647	2021-02-09	21.0013	19.0676		2021-02-09	7.74842	4.55238	14.6264	15.5132	11.4931	19.0676	11.0457	11.3217	9.25725	10.6418	17.242	12.0463	9.99199	5.30048	44.8678	22.9413
2021-02-10	0.111583	0.0733272	0.0943212	0.164061	0.168712	0.226294	0.107954	0.109984	0.127713	0.127374	0.160537	0.133805		0.243903	0.407829		2021-02-10	0.140883	0.0628931	0.0813329	2021-02-10	21.2276	19.2731		2021-02-10	7.85227	4.61891	14.7196	15.678	11.6154	19.2731	11.1418	11.4308	9.35665	10.7424	17.4042	12.1667	10.1388	5.54439	45.2756	23.1679
2021-02-11	0.110752	0.073931	0.0998371	0.164619	0.169289	0.226815	0.1082	0.110207	0.128165	0.127874	0.160874	0.134597		0.244698	0.407829		2021-02-11	0.140809	0.0629865	0.0830188	2021-02-11	21.4544	19.479		2021-02-11	7.95536	4.68599	14.8183	15.8434	11.7381	19.479	11.2382	11.5401	9.4564	10.8434	17.5668	12.2877	10.2877	5.78908	45.6835	23.3954
2021-02-12	0.10992	0.0745347	0.105353	0.165177	0.169866	0.227336	0.108446	0.11043	0.128618	0.128375	0.161211	0.135388		0.282282	0.407829		2021-02-12	0.140736	0.06308	0.0847048	2021-02-12	21.6817	19.6854		2021-02-12	8.05766	4.75362	14.9225	16.0093	11.8612	19.6854	11.3347	11.6496	9.5565	10.9448	17.7297	12.4096	10.4388	6.07137	46.0913	23.6239
2021-02-13	0.109089	0.0751385	0.110869	0.165735	0.170443	0.227858	0.108692	0.110653	0.12907	0.128875	0.161548	0.136179		0.353244	0.407829		2021-02-13	0.140662	0.0631734	0.0863907	2021-02-13	21.9096	19.8923		2021-02-13	8.1592	4.82179	15.0321	16.1758	11.9848	19.8923	11.4315	11.7594	9.65696	11.0466	17.893	12.5321	10.5921	6.42461	46.4991	23.8533
2021-02-14	0.108258	0.0757423	0.116385	0.166292	0.17102	0.228379	0.108938	0.110876	0.129522	0.129375	0.161885	0.13697		0.294892	0.407829		2021-02-14	0.140589	0.0632668	0.0880767	2021-02-14	22.138	20.0996		2021-02-14	8.25996	4.89051	15.1472	16.3429	12.1088	20.0996	11.5285	11.8694	9.75776	11.1487	18.0566	12.6554	10.7476	6.7195	46.907	24.0837
2021-02-15	0.107426	0.0763461	0.121901	0.16685	0.171598	0.2289	0.109184	0.111099	0.129975	0.129875	0.162223	0.137761		0.300172	0.407829		2021-02-15	0.140515	0.0633603	0.0897626	2021-02-15	22.3669	20.3075		2021-02-15	8.35995	4.95978	15.2677	16.5105	12.2331	20.3075	11.6257	11.9796	9.85892	11.2513	18.2205	12.7795	10.9052	7.01967	47.3148	24.315
2021-02-16	0.106595	0.0769499	0.127416	0.167408	0.172175	0.229422	0.10943	0.111322	0.130427	0.130375	0.16256	0.138553		0.30483	0.407829		2021-02-16	0.140442	0.0634537	0.0914485	2021-02-16	22.5963	20.5158		2021-02-16	8.45916	5.0296	15.3937	16.6786	12.3579	20.5158	11.7231	12.0901	9.96043	11.3542	18.3848	12.9043	11.065	7.3245	47.7226	24.5472
2021-02-17	0.105763	0.0775537	0.132932	0.167966	0.172752	0.229943	0.109676	0.111545	0.130879	0.130875	0.162897	0.139344		0.314701	0.407829		2021-02-17	0.140368	0.0635471	0.0931345	2021-02-17	22.8262	20.7245		2021-02-17	8.5576	5.09996	15.5251	16.8474	12.4832	20.7245	11.8207	12.2007	10.0623	11.4576	18.5494	13.0299	11.227	7.63921	48.1304	24.7804
2021-02-18	0.104932	0.0781575	0.138448	0.168524	0.173329	0.230464	0.109922	0.111768	0.131332	0.131375	0.163234	0.140135		0.272149	0.407829		2021-02-18	0.140295	0.0636405	0.0948204	2021-02-18	23.0567	20.9338		2021-02-18	8.65526	5.17087	15.662	17.0167	12.6088	20.9338	11.9186	12.3116	10.1645	11.5613	18.7144	13.1562	11.3912	7.91135	48.5383	25.0146
2021-02-19	0.1041	0.0787613	0.143964	0.169081	0.173906	0.230986	0.110168	0.111991	0.131784	0.131875	0.163571	0.140926		0.190579	0.332693		2021-02-19	0.140222	0.063734	0.0965064	2021-02-19	23.2877	21.1435		2021-02-19	8.75215	5.24233	15.8044	17.1865	12.7349	21.1435	12.0167	12.4227	10.2671	11.6655	18.8797	13.2832	11.5576	8.10193	48.871	25.2496
2021-02-20	0.103269	0.0793651	0.14948	0.169639	0.174483	0.231507	0.110414	0.112214	0.132236	0.132375	0.163909	0.141717		0.212214	0.332693		2021-02-20	0.140148	0.0638274	0.0981923	2021-02-20	23.5192	21.3537		2021-02-20	8.84827	5.31434	15.9522	17.3569	12.8613	21.3537	12.115	12.534	10.37	11.77	19.0453	13.411	11.7261	8.31415	49.2037	25.4857
2021-02-21	0.102437	0.0803099	0.154996	0.170197	0.175061	0.232028	0.11066	0.112437	0.132689	0.132875	0.164246	0.14254		0.267676	0.332693		2021-02-21	0.140075	0.0639208	0.0998782	2021-02-21	23.7512	21.5644		2021-02-21	8.94361	5.38721	16.1054	17.5279	12.9882	21.5644	12.2135	12.6456	10.4733	11.8749	19.2113	13.5396	11.8968	8.58182	49.5363	25.7226
2021-02-22	0.101606	0.0812547	0.160512	0.170755	0.175638	0.232549	0.110906	0.11266	0.133141	0.133375	0.164583	0.143362		0.279152	0.332693		2021-02-22	0.140001	0.0640143	0.101564	2021-02-22	23.9838	21.7755		2021-02-22	9.03818	5.46093	16.2641	17.6994	13.1155	21.7755	12.3123	12.7573	10.5769	11.9803	19.3776	13.6689	12.0697	8.86098	49.869	25.9605
2021-02-23	0.100774	0.0821995	0.166027	0.171313	0.176215	0.233071	0.111153	0.112883	0.133593	0.133876	0.16492	0.144184		0.297885	0.265816		2021-02-23	0.139928	0.0641077	0.10325	2021-02-23	24.2168	21.9871		2021-02-23	9.13198	5.53551	16.4283	17.8715	13.2433	21.9871	12.4112	12.8693	10.6809	12.086	19.5443	13.799	12.2448	9.15886	50.1349	26.1994
2021-02-24	0.0999428	0.0831444	0.171543	0.17187	0.176792	0.233592	0.111399	0.113106	0.134046	0.134376	0.165257	0.145006		0.317349	0.265816		2021-02-24	0.139854	0.0642011	0.104936	2021-02-24	24.4504	22.1992		2021-02-24	9.225	5.61095	16.5979	18.0442	13.3714	22.1992	12.5104	12.9815	10.7852	12.1921	19.7113	13.9299	12.422	9.47621	50.4007	26.4391
2021-02-25	0.0991113	0.0840892	0.177059	0.172428	0.177369	0.234113	0.111645	0.113329	0.134498	0.134876	0.165595	0.145828		0.320544	0.265816		2021-02-25	0.139781	0.0642945	0.106622	2021-02-25	24.6845	22.4117		2021-02-25	9.31725	5.68724	16.7729	18.2174	13.5	22.4117	12.6098	13.0939	10.8899	12.2986	19.8787	14.0616	12.6014	9.79675	50.6665	26.6799
2021-02-26	0.0982799	0.085034	0.182575	0.172986	0.177946	0.234635	0.111891	0.113552	0.13495	0.135376	0.165932	0.146651		0.301234	0.265816		2021-02-26	0.139707	0.064388	0.108308	2021-02-26	24.9192	22.6248		2021-02-26	9.40872	5.76439	16.9534	18.3912	13.629	22.6248	12.7094	13.2066	10.9949	12.4055	20.0463	14.194	12.783	10.098	50.9323	26.9215
2021-02-27	0.0974484	0.0859788	0.188091	0.173544	0.178524	0.235156	0.112137	0.113775	0.135403	0.135876	0.166269	0.147473		0.308177	0.265816		2021-02-27	0.139634	0.0644814	0.109994	2021-02-27	25.1543	22.8383		2021-02-27	9.49942	5.8424	17.1394	18.5655	13.7584	22.8383	12.8092	13.3195	11.1003	12.5128	20.2144	14.3272	12.9668	10.4062	51.1981	27.1641
2021-02-28	0.0966169	0.0869237	0.193607	0.174102	0.179101	0.235677	0.112383	0.113998	0.135855	0.136376	0.166606	0.148295		0.252646	0.265816		2021-02-28	0.139561	0.0645748	0.11168	2021-02-28	25.39	23.0523		2021-02-28	9.58934	5.92127	17.3308	18.7404	13.8882	23.0523	12.9093	13.4325	11.206	12.6205	20.3827	14.4612	13.1527	10.6588	51.4639	27.4077
2021-03-01	0.0957854	0.0878685	0.199123	0.174659	0.179678	0.236199	0.112629	0.114221	0.136307	0.136876	0.166943	0.149117		0.267153	0.265816		2021-03-01	0.139487	0.0646683	0.113366	2021-03-01	25.6262	23.2667		2021-03-01	9.6785	6.00099	17.5277	18.9158	14.0184	23.2667	13.0096	13.5459	11.3121	12.7286	20.5515	14.596	13.3408	10.926	51.7298	27.6522
2021-03-02	0.0955723	0.0888133	0.183421	0.175217	0.180255	0.23672	0.112875	0.114444	0.13676	0.137376	0.167281	0.148067		0.256741	0.265816		2021-03-02	0.139414	0.0647617	0.114936	2021-03-02	25.8629	23.4816		2021-03-02	9.76745	6.08157	17.7091	19.0919	14.1491	23.4816	13.1101	13.6594	11.4185	12.8371	20.7205	14.7297	13.5311	11.1827	51.9956	27.8976
2021-03-03	0.0953593	0.0897581	0.16772	0.175775	0.180832	0.237241	0.113121	0.114667	0.137212	0.137876	0.167618	0.147016		0.422321	0.265816		2021-03-03	0.13934	0.0648551	0.116506	2021-03-03	26.1002	23.697		2021-03-03	9.85621	6.16301	17.8749	19.2684	14.2802	23.697	13.2108	13.7731	11.5253	12.946	20.8899	14.8623	13.7236	11.605	52.2614	28.144
2021-03-04	0.0951462	0.0907029	0.152018	0.176333	0.181409	0.237763	0.113367	0.11489	0.137664	0.138376	0.167955	0.145966		0.455192	0.265816		2021-03-04	0.139267	0.0649485	0.118076	2021-03-04	26.3379	23.9129		2021-03-04	9.94476	6.2453	18.0252	19.4456	14.4117	23.9129	13.3117	13.8871	11.6325	13.0553	21.0596	14.9938	13.9183	12.0602	52.5272	28.3913
2021-03-05	0.0949331	0.0916478	0.136317	0.176891	0.181987	0.238284	0.113613	0.115113	0.138117	0.138876	0.168292	0.144915		0.317663	0.397907		2021-03-05	0.139193	0.065042	0.119646	2021-03-05	26.5762	24.1292		2021-03-05	10.0331	6.32845	18.16	19.6233	14.5436	24.1292	13.4129	14.0013	11.74	13.1649	21.2297	15.1242	14.1151	12.3779	52.9251	28.6396
2021-03-06	0.09472	0.0925926	0.120615	0.177448	0.182564	0.238805	0.113859	0.115336	0.138569	0.139376	0.168629	0.143865		0.3831	0.397907		2021-03-06	0.13912	0.0651354	0.121217	2021-03-06	26.815	24.3461		2021-03-06	10.1213	6.41246	18.2792	19.8015	14.6759	24.3461	13.5142	14.1157	11.8478	13.275	21.4001	15.2536	14.3141	12.761	53.323	28.8888
2021-03-07	0.0945069	0.0935374	0.104914	0.178006	0.183141	0.239326	0.114105	0.115559	0.139021	0.139877	0.168967	0.142815		0.273649	0.397907		2021-03-07	0.139046	0.0652288	0.122787	2021-03-07	27.0543	24.5634		2021-03-07	10.2092	6.49733	18.383	19.9803	14.8087	24.5634	13.6158	14.2304	11.956	13.3855	21.5709	15.3819	14.5153	13.0346	53.7209	29.1389
2021-03-08	0.0942938	0.0944822	0.0892126	0.178564	0.183718	0.239848	0.114351	0.115782	0.139474	0.140377	0.169304	0.141764		0.242179	0.397907		2021-03-08	0.138973	0.0653223	0.124357	2021-03-08	27.2942	24.7811		2021-03-08	10.297	6.58305	18.4712	20.1597	14.9418	24.7811	13.7176	14.3452	12.0646	13.4963	21.742	15.5091	14.7187	13.2768	54.1188	29.39
2021-03-09	0.0940807	0.0954271	0.0735112	0.179122	0.184295	0.240369	0.114597	0.116005	0.139926	0.140877	0.169641	0.140714		0.442307	0.397907		2021-03-09	0.1389	0.0654157	0.125927	2021-03-09	27.5346	24.9994		2021-03-09	10.3846	6.66964	18.5439	20.3396	15.0754	24.9994	13.8197	14.4603	12.1735	13.6076	21.9134	15.6352	14.9242	13.7191	54.5167	29.642
2021-03-10	0.0938676	0.0963719	0.0578098	0.179679	0.184872	0.24089	0.114843	0.116228	0.140378	0.141377	0.169978	0.139663		0.450119	0.361188		2021-03-10	0.138826	0.0655091	0.127497	2021-03-10	27.7755	25.2181		2021-03-10	10.4719	6.75707	18.601	20.5201	15.2094	25.2181	13.9219	14.5756	12.2827	13.7192	22.0852	15.7602	15.1319	14.1692	54.8779	29.895
2021-03-11	0.0936545	0.0973167	0.0617259	0.180237	0.18545	0.241412	0.11509	0.116451	0.140831	0.141877	0.170315	0.140396		0.292035	0.361188		2021-03-11	0.138753	0.0656025	0.129067	2021-03-11	28.0169	25.4372		2021-03-11	10.5591	6.84537	18.662	20.7012	15.3439	25.4372	14.0244	14.6911	12.3923	13.8312	22.2573	15.8859	15.3418	14.4613	55.2391	30.1489
2021-03-12	0.0934414	0.0982615	0.0656421	0.180795	0.186027	0.241933	0.115336	0.116674	0.141283	0.142377	0.170653	0.141129		0.25806	0.361188		2021-03-12	0.138679	0.065696	0.130638	2021-03-12	28.2588	25.6569		2021-03-12	10.6461	6.93452	18.7269	20.8828	15.4787	25.6569	14.127	14.8069	12.5023	13.9437	22.4298	16.0123	15.5539	14.7193	55.6003	30.4038
2021-03-13	0.0932283	0.0992063	0.0695582	0.181353	0.186604	0.242454	0.115582	0.116897	0.141735	0.142877	0.17099	0.141862		0.228804	0.361188		2021-03-13	0.138606	0.0657894	0.132208	2021-03-13	28.5013	25.877		2021-03-13	10.7328	7.02453	18.7957	21.065	15.614	25.877	14.23	14.9229	12.6126	14.0565	22.6026	16.1394	15.7681	14.9481	55.9615	30.6596
2021-03-14	0.0930152	0.100151	0.0734744	0.181911	0.187181	0.242976	0.115828	0.11712	0.142188	0.143377	0.171327	0.142595		0.422664	0.361188		2021-03-14	0.138532	0.0658828	0.133778	2021-03-14	28.7442	26.0976		2021-03-14	10.8194	7.1154	18.8684	21.2477	15.7496	26.0976	14.3331	15.039	12.7233	14.1697	22.7757	16.2672	15.9845	15.3708	56.3227	30.9114
2021-03-15	0.0928021	0.101096	0.0773905	0.182468	0.187758	0.243497	0.116074	0.117343	0.14264	0.143877	0.171664	0.143328		0.353349	0.361188		2021-03-15	0.138459	0.0659763	0.135348	2021-03-15	28.9877	26.3187		2021-03-15	10.9058	7.20712	18.9449	21.431	15.8857	26.3187	14.4364	15.1555	12.8343	14.2834	22.9492	16.3956	16.2031	15.7241	56.6839	31.1594
2021-03-16	0.092589	0.102041	0.0813067	0.183026	0.19317	0.246207	0.121725	0.123826	0.15263	0.144377	0.172001	0.146627		0.210121	0.361188		2021-03-16	0.138715	0.0674141	0.136918	2021-03-16	29.2339	26.5423		2021-03-16	10.992	7.29971	19.0253	21.6149	16.0258	26.5423	14.5448	15.2783	12.9531	14.3974	23.123	16.5269	16.4227	15.9343	57.0451	31.4034
2021-03-17	0.0923759	0.102986	0.0852228	0.183584	0.198582	0.248917	0.127376	0.13031	0.16262	0.144877	0.172339	0.149926		0.355098	0.271007		2021-03-17	0.13897	0.068852	0.138488	2021-03-17	29.4828	26.7683		2021-03-17	11.078	7.39314	19.1095	21.7993	16.1697	26.7683	14.6582	15.4076	13.0796	14.5118	23.2972	16.6611	16.6434	16.2894	57.3161	31.6434
2021-03-18	0.0921629	0.10393	0.0891389	0.184142	0.203995	0.251627	0.133028	0.136794	0.17261	0.145378	0.172676	0.153226		0.245171	0.271007		2021-03-18	0.139226	0.0702898	0.140058	2021-03-18	29.7345	26.9967		2021-03-18	11.1637	7.48744	19.1977	21.9843	16.3176	26.9967	14.7766	15.5433	13.214	14.6266	23.4717	16.7981	16.865	16.5345	57.5871	31.8795
2021-03-19	0.0919498	0.104875	0.0930551	0.1847	0.209407	0.254337	0.138679	0.143278	0.1826	0.145878	0.173013	0.156525		0.536264	0.271007		2021-03-19	0.139482	0.0717277	0.141629	2021-03-19	29.9888	27.2276		2021-03-19	11.2493	7.58259	19.2897	22.1698	16.4694	27.2276	14.9001	15.6854	13.3561	14.7418	23.6465	16.938	17.0877	17.0708	57.8581	32.1117
2021-03-20	0.0917367	0.10582	0.0969712	0.185257	0.214819	0.257047	0.14433	0.149762	0.19259	0.146378	0.17335	0.159824		0.250391	0.271007		2021-03-20	0.139737	0.0731656	0.143199	2021-03-20	30.2459	27.461		2021-03-20	11.3347	7.67861	19.3855	22.3559	16.6251	27.461	15.0286	15.834	13.506	14.8574	23.8217	17.0808	17.3114	17.3212	58.1291	32.34
2021-03-21	0.0915236	0.104308	0.100887	0.185815	0.220231	0.259757	0.149982	0.156246	0.20258	0.15534	0.182011	0.164426		0.436279	0.271007		2021-03-21	0.139993	0.0746034	0.141411	2021-03-21	30.5056	27.6969		2021-03-21	11.4199	7.77324	19.4853	22.5426	16.7847	27.6969	15.1621	15.989	13.6636	14.98	24.0056	17.2275	17.5361	17.7575	58.4001	32.5643
2021-03-22	0.0913105	0.102797	0.104804	0.186373	0.225643	0.262467	0.155633	0.16273	0.21257	0.164302	0.190672	0.169027		0.212002	0.271007		2021-03-22	0.140249	0.0760413	0.139623	2021-03-22	30.7681	27.9352		2021-03-22	11.5049	7.86651	19.5889	22.7298	16.9483	27.9352	15.3007	16.1504	13.8291	15.1098	24.1983	17.3783	17.7619	17.9695	58.6711	32.7846
2021-03-23	0.0910974	0.101285	0.10872	0.186931	0.231055	0.265177	0.161284	0.169214	0.22256	0.173264	0.199333	0.173629		0.284715	0.271007		2021-03-23	0.140505	0.0774792	0.137834	2021-03-23	31.0333	28.1759		2021-03-23	11.5897	7.95841	19.6964	22.9176	17.1158	28.1759	15.4443	16.3183	14.0023	15.2466	24.3998	17.5332	17.9886	18.2542	58.9421	33.0052
2021-03-24	0.0908843	0.0997732	0.112636	0.187489	0.236467	0.267887	0.166936	0.175698	0.23255	0.182226	0.207993	0.178231		0.225473	0.271007		2021-03-24	0.14076	0.078917	0.136046	2021-03-24	31.3011	28.4191		2021-03-24	11.6743	8.04893	19.8078	23.1059	17.2872	28.4191	15.5929	16.4926	14.1833	15.3905	24.61	17.692	18.2164	18.4797	59.2131	33.2255
2021-03-25	0.0906712	0.0982615	0.116552	0.188046	0.241879	0.270597	0.172587	0.182182	0.24254	0.191188	0.216654	0.182833		0.389349	0.271007		2021-03-25	0.141016	0.0803549	0.134258	2021-03-25	31.5717	28.6648		2021-03-25	11.7586	8.13808	19.923	23.2948	17.4625	28.6648	15.7466	16.6733	14.372	15.5415	24.8289	17.8549	18.4452	18.869	59.4841	33.4456
2021-03-26	0.0904581	0.0967498	0.120468	0.188604	0.247291	0.273307	0.178238	0.188666	0.25253	0.20015	0.225315	0.187434		0.209165	0.271007		2021-03-26	0.141272	0.0817928	0.13247	2021-03-26	31.8451	28.913		2021-03-26	11.8428	8.22587	20.0421	23.4843	17.6417	28.913	15.9052	16.8605	14.5686	15.6996	25.0566	18.0218	18.675	19.0782	59.7551	33.6655
2021-03-27	0.090245	0.0952381	0.124384	0.189162	0.252703	0.276017	0.18389	0.195149	0.26252	0.209112	0.233976	0.192036		0.545868	0.271007		2021-03-27	0.141527	0.0832306	0.130682	2021-03-27	32.1211	29.1636		2021-03-27	11.9268	8.31228	20.1651	23.6743	17.8249	29.1636	16.069	17.0541	14.7729	15.8647	25.2931	18.1928	18.9058	19.624	60.0261	33.8851
2021-03-28	0.0900319	0.0937264	0.1283	0.18972	0.258115	0.278727	0.189541	0.201633	0.272509	0.218074	0.242636	0.196638		0.443584	0.271007		2021-03-28	0.141783	0.0846685	0.128894	2021-03-28	32.3998	29.4166		2021-03-28	12.0106	8.39731	20.292	23.8649	18.012	29.4166	16.2377	17.2541	14.985	16.0369	25.5383	18.3678	19.1377	20.0676	60.2971	34.1045
2021-03-29	0.0898188	0.0922147	0.132217	0.190278	0.263528	0.281437	0.195192	0.208117	0.282499	0.227036	0.251297	0.20124		0.260455	0.271007		2021-03-29	0.142039	0.0861064	0.127106	2021-03-29	32.6812	29.6722		2021-03-29	12.0942	8.48098	20.4227	24.056	18.203	29.6722	16.4115	17.4606	15.2049	16.2162	25.7922	18.5468	19.3706	20.3281	60.5681	34.3237
2021-03-30	0.0896057	0.0907029	0.136133	0.190835	0.26894	0.284148	0.200844	0.214601	0.292489	0.235998	0.259958	0.205841		0.4634	0.271007		2021-03-30	0.142294	0.0875442	0.125318	2021-03-30	32.9654	29.9301		2021-03-30	12.1776	8.56328	20.5573	24.2478	18.398	29.9301	16.5903	17.6735	15.4325	16.4026	26.055	18.7298	19.6044	20.7915	60.8392	34.5426
2021-03-31	0.0916933	0.0891912	0.140049	0.191393	0.274352	0.286858	0.206495	0.221085	0.302479	0.24496	0.268619	0.210652		0.291936	0.178548		2021-03-31	0.14255	0.0889821	0.123529	2021-03-31	33.2522	30.1906		2021-03-31	12.263	8.6442	20.6957	24.44	18.5968	30.1906	16.7741	17.8928	15.6679	16.596	26.3264	18.9171	19.8394	21.0834	61.0177	34.7613
2021-04-01	0.0937809	0.0876795	0.143965	0.191951	0.279764	0.289568	0.212146	0.227569	0.312469	0.253922	0.277279	0.215463		0.253856	0.178548		2021-04-01	0.142806	0.0904199	0.121741	2021-04-01	33.5418	30.4535		2021-04-01	12.3503	8.72375	20.8381	24.6328	18.7996	30.4535	16.963	18.1185	15.9111	16.7965	26.6066	19.1085	20.0753	21.3373	61.1962	34.9798
2021-04-02	0.0958685	0.0861678	0.147881	0.192509	0.285176	0.292278	0.217798	0.234053	0.322459	0.262884	0.28594	0.220274		0.364195	0.178548		2021-04-02	0.143062	0.0918578	0.119953	2021-04-02	33.8341	30.7189		2021-04-02	12.4395	8.80193	20.9843	24.8262	19.0063	30.7189	17.1569	18.3507	16.1621	17.0041	26.8956	19.3042	20.3122	21.7015	61.3748	35.198
2021-04-03	0.0979561	0.0846561	0.151797	0.193067	0.290588	0.294988	0.223449	0.240537	0.332449	0.271846	0.294601	0.225085		0.279454	0.178548		2021-04-03	0.143317	0.0932957	0.118165	2021-04-03	34.1291	30.9867		2021-04-03	12.5307	8.87874	21.1344	25.0202	19.217	30.9867	17.3559	18.5894	16.4208	17.2188	27.1933	19.5042	20.5502	21.9809	61.5533	35.4161
2021-04-04	0.100044	0.0831444	0.155713	0.193624	0.296	0.297698	0.2291	0.247021	0.342439	0.280808	0.303262	0.229896		0.36359	0.178548		2021-04-04	0.143573	0.0947335	0.116377	2021-04-04	34.4268	31.257		2021-04-04	12.6238	8.95418	21.2883	25.2147	19.4315	31.257	17.5598	18.8344	16.6873	17.4406	27.4998	19.7083	20.7892	22.3445	61.7319	35.6338
2021-04-05	0.102131	0.0816327	0.15963	0.194182	0.301412	0.300408	0.234752	0.253505	0.352429	0.28977	0.311922	0.234707		0.359154	0.206015		2021-04-05	0.143829	0.0961714	0.114589	2021-04-05	34.7272	31.5297		2021-04-05	12.7188	9.02824	21.4462	25.4097	19.65	31.5297	17.7688	19.0859	16.9616	17.6694	27.815	19.9167	21.0292	22.7037	61.9379	35.8514
2021-04-06	0.104219	0.0801209	0.163546	0.19474	0.306824	0.303118	0.240403	0.259989	0.362419	0.298732	0.320583	0.239518		0.493976	0.206015		2021-04-06	0.144084	0.0976093	0.112801	2021-04-06	35.0303	31.8049		2021-04-06	12.8158	9.10094	21.6079	25.6054	19.8724	31.8049	17.9829	19.3438	17.2437	17.9053	28.139	20.1293	21.2702	23.1976	62.1439	36.0687
2021-04-07	0.106306	0.0786092	0.167462	0.195298	0.312236	0.305828	0.246054	0.266472	0.372409	0.307694	0.329244	0.244329		0.309904	0.206015		2021-04-07	0.14434	0.0990471	0.111013	2021-04-07	35.3361	32.0826		2021-04-07	12.9148	9.17226	21.7734	25.8016	20.0987	32.0826	18.2019	19.6082	17.5335	18.1483	28.4717	20.3461	21.5123	23.5075	62.3499	36.3162
2021-04-08	0.108394	0.0770975	0.171378	0.195856	0.317648	0.308538	0.251706	0.272956	0.382399	0.316656	0.337904	0.249139		0.347544	0.206015		2021-04-08	0.144596	0.100485	0.109224	2021-04-08	35.6447	32.3627		2021-04-08	13.0157	9.24221	21.9429	25.9983	20.329	32.3627	18.426	19.879	17.8312	18.3983	28.8132	20.5671	21.7553	23.8551	62.556	36.5483
2021-04-09	0.110482	0.0755858	0.175294	0.196413	0.323061	0.311248	0.257357	0.27944	0.392389	0.325618	0.346565	0.25395		0.344417	0.206015		2021-04-09	0.144852	0.101923	0.107436	2021-04-09	35.9559	32.6453		2021-04-09	13.1185	9.31079	22.1162	26.1956	20.5632	32.6453	18.6552	20.1562	18.1365	18.6555	29.1634	20.7924	21.9994	24.1995	62.762	36.7649
2021-04-10	0.112569	0.0740741	0.17921	0.196971	0.328473	0.313958	0.263008	0.285924	0.402379	0.33458	0.355226	0.258761		0.251071	0.206015		2021-04-10	0.145107	0.103361	0.105648	2021-04-10	36.2699	32.9304		2021-04-10	13.2233	9.37799	22.2934	26.3935	20.8013	32.9304	18.8893	20.4398	18.4497	18.9197	29.5224	21.0219	22.2445	24.4506	62.968	36.9854
2021-04-11	0.114657	0.0790123	0.17921	0.197529	0.333885	0.316668	0.26866	0.292408	0.412369	0.343542	0.363887	0.263802		0.403578	0.206015		2021-04-11	0.145363	0.104799	0.10386	2021-04-11	36.5865	33.2179		2021-04-11	13.33	9.44968	22.4706	26.5919	21.0433	33.2179	19.1285	20.7299	18.7707	19.191	29.8902	21.2558	22.4906	24.8542	63.174	37.2098
2021-04-12	0.116744	0.0839506	0.17921	0.198087	0.339297	0.319378	0.274311	0.298892	0.422359	0.352505	0.372547	0.268844		0.338041	0.206015		2021-04-12	0.145619	0.106236	0.102072	2021-04-12	36.9059	33.5079		2021-04-12	13.4386	9.52585	22.6478	26.7909	21.2892	33.5079	19.3727	21.0264	19.0994	19.4694	30.2667	21.4941	22.7378	25.1922	63.38	37.4381
2021-04-13	0.118832	0.0888889	0.17921	0.198644	0.344709	0.322088	0.279963	0.305376	0.432349	0.361467	0.381208	0.273885		0.380973	0.206015		2021-04-13	0.145874	0.107674	0.100284	2021-04-13	37.228	33.8003		2021-04-13	13.5492	9.6065	22.825	26.9904	21.5391	33.8003	19.622	21.3294	19.4359	19.7548	30.6519	21.7368	22.986	25.5732	63.586	37.6702
2021-04-14	0.12092	0.0938272	0.17921	0.199202	0.350121	0.324798	0.285614	0.31186	0.442339	0.370429	0.389869	0.278926		0.394373	0.206015		2021-04-14	0.14613	0.109112	0.0984957	2021-04-14	37.5528	34.0952		2021-04-14	13.6618	9.69163	23.0022	27.1905	21.7929	34.0952	19.8763	21.6387	19.7801	20.0473	31.0459	21.9839	23.2351	25.9675	63.792	37.9007
2021-04-15	0.123007	0.0987654	0.17921	0.19976	0.355533	0.327508	0.291265	0.318344	0.452329	0.379391	0.39853	0.283967		0.56115	0.206015		2021-04-15	0.146386	0.11055	0.0967076	2021-04-15	37.8803	34.3925		2021-04-15	13.7763	9.78124	23.1793	27.3912	22.0506	34.3925	20.1356	21.9546	20.1322	20.347	31.4487	22.2354	23.4853	26.5287	63.9981	38.1297
2021-04-16	0.125095	0.103704	0.17921	0.200318	0.360945	0.326996	0.296917	0.324828	0.462319	0.388353	0.40719	0.288716		0.211759	0.206273		2021-04-16	0.146641	0.111988	0.0949195	2021-04-16	38.2073	34.6894		2021-04-16	13.8927	9.87533	23.3565	27.5924	22.3122	34.6894	20.3999	22.2768	20.492	20.6536	31.8602	22.491	23.7403	26.7405	64.2043	38.357
2021-04-17	0.127182	0.108642	0.17921	0.200876	0.366357	0.326484	0.302568	0.331312	0.472309	0.397315	0.415851	0.293464		0.318719	0.206273		2021-04-17	0.146897	0.113426	0.0931314	2021-04-17	38.5338	34.9858		2021-04-17	14.0111	9.9739	23.5337	27.7942	22.5778	34.9858	20.6693	22.6055	20.8596	20.9674	32.2804	22.7508	24.0001	27.0592	64.4106	38.5852
2021-04-18	0.12927	0.11358	0.17921	0.201433	0.371769	0.325971	0.308219	0.337796	0.482299	0.406277	0.424512	0.298212		0.364111	0.206273		2021-04-18	0.147153	0.114864	0.0913433	2021-04-18	38.8598	35.2818		2021-04-18	14.1314	10.077	23.7109	27.9966	22.8472	35.2818	20.9437	22.9406	21.235	21.2882	32.7094	23.0147	24.2647	27.4233	64.6169	38.8141
2021-04-19	0.131358	0.118519	0.17921	0.201991	0.377181	0.325459	0.313871	0.344279	0.492289	0.415239	0.433173	0.302961		0.203261	0.206273		2021-04-19	0.147409	0.116302	0.0895551	2021-04-19	39.1852	35.5773		2021-04-19	14.2537	10.1845	23.8881	28.1995	23.1207	35.5773	21.2232	23.2821	21.6181	21.6161	33.1472	23.2828	24.5341	27.6265	64.8232	39.0438
2021-04-20	0.133445	0.123457	0.17921	0.202549	0.382593	0.324946	0.319522	0.350763	0.502279	0.424201	0.441833	0.307709		0.231112	0.206273		2021-04-20	0.147664	0.117739	0.087767	2021-04-20	39.5102	35.8723		2021-04-20	14.3779	10.2965	24.0653	28.403	23.398	35.8723	21.5076	23.6301	22.009	21.9511	33.5937	23.555	24.8083	27.8577	65.0294	39.2606
2021-04-21	0.135533	0.128395	0.17921	0.204293	0.388006	0.324434	0.325173	0.357247	0.512269	0.433163	0.450494	0.312565		0.238547	0.206273		2021-04-21	0.14792	0.119177	0.0940082	2021-04-21	39.8346	36.1669		2021-04-21	14.504	10.413	24.2425	28.6082	23.6792	36.1669	21.7971	23.9845	22.4077	22.2932	34.0489	23.8314	25.0873	28.0962	65.2357	39.4644
2021-04-22	0.13762	0.133333	0.17921	0.206038	0.393418	0.323922	0.330825	0.363731	0.522259	0.442125	0.459155	0.317421		0.395756	0.206273		2021-04-22	0.148176	0.120615	0.100249	2021-04-22	40.1585	36.461		2021-04-22	14.6321	10.534	24.4197	28.8152	23.9644	36.461	22.0917	24.3453	22.8142	22.6423	34.513	24.1121	25.371	28.492	65.442	39.6551
2021-04-23	0.139708	0.138272	0.17921	0.207782	0.39883	0.323409	0.336476	0.370215	0.532249	0.451087	0.467816	0.322278		0.395762	0.206273		2021-04-23	0.148431	0.122053	0.106491	2021-04-23	40.4819	36.7546		2021-04-23	14.7621	10.6594	24.5969	29.0239	24.2535	36.7546	22.3912	24.7126	23.2284	22.9986	34.9857	24.397	25.6596	28.8877	65.6482	39.8329
2021-04-24	0.141795	0.14321	0.17921	0.209526	0.404242	0.322897	0.342127	0.376699	0.542239	0.460049	0.476476	0.327134		0.502629	0.206273		2021-04-24	0.148687	0.123491	0.112732	2021-04-24	40.8048	37.0478		2021-04-24	14.8941	10.7894	24.774	29.2344	24.5465	37.0478	22.6958	25.0863	23.6504	23.3619	35.4673	24.6862	25.953	29.3903	65.8545	39.9976
2021-04-25	0.143883	0.148148	0.17921	0.211271	0.409654	0.322384	0.347779	0.383183	0.552229	0.469011	0.485137	0.33199		0.464581	0.206273		2021-04-25	0.148943	0.124929	0.118973	2021-04-25	41.1272	37.3405		2021-04-25	15.028	10.9238	24.9512	29.4466	24.8434	37.3405	23.0055	25.4664	24.0802	23.7322	35.9575	24.9796	26.2511	29.8549	66.0608	40.1494
2021-04-26	0.145971	0.153086	0.17921	0.213015	0.415066	0.321872	0.35343	0.389667	0.562219	0.477973	0.493798	0.336846		0.510115	0.206273		2021-04-26	0.149198	0.126367	0.125214	2021-04-26	41.4491	37.6327		2021-04-26	15.1639	11.0627	25.1284	29.6606	25.1443	37.6327	23.3201	25.853	24.5178	24.1097	36.4566	25.2773	26.5541	30.365	66.2671	40.2882
2021-04-27	0.148058	0.158025	0.17921	0.214759	0.420478	0.32136	0.359081	0.396151	0.572209	0.486935	0.502459	0.341702		0.644562	0.206273		2021-04-27	0.149454	0.127804	0.131455	2021-04-27	41.7704	37.9245		2021-04-27	15.3017	11.206	25.3056	29.8763	25.4491	37.9245	23.6398	26.246	24.9631	24.4942	36.9643	25.5792	26.8618	31.0096	66.4733	40.4139
2021-04-28	0.150146	0.162963	0.17921	0.216503	0.42589	0.320847	0.364733	0.402635	0.582199	0.495897	0.511119	0.346558		0.765721	0.206273		2021-04-28	0.14971	0.129242	0.137697	2021-04-28	42.0913	38.2158		2021-04-28	15.4414	11.3539	25.4828	30.0938	25.7578	38.2158	23.9645	26.6454	25.4163	24.8858	37.4809	25.8853	27.1744	31.7753	66.6796	40.5694
2021-04-29	0.152233	0.167901	0.17921	0.218248	0.431302	0.320335	0.370384	0.409119	0.592188	0.504859	0.51978	0.351415		0.648068	0.206273		2021-04-29	0.149966	0.13068	0.143938	2021-04-29	42.4116	38.5066		2021-04-29	15.5831	11.5062	25.66	30.3131	26.0704	38.5066	24.2943	27.0513	25.8772	25.2845	38.0062	26.1957	27.4917	32.4234	66.8859	40.7425
2021-04-30	0.154321	0.17284	0.17921	0.219992	0.436714	0.319823	0.376035	0.415602	0.602178	0.513821	0.528441	0.356271		0.779767	0.206273		2021-04-30	0.150221	0.132118	0.150179	2021-04-30	42.7314	38.797		2021-04-30	15.7268	11.663	25.8372	30.534	26.387	38.797	24.6291	27.4636	26.3458	25.6903	38.5402	26.5104	27.8139	33.2032	67.0922	40.9334
2021-05-01	0.184328	0.177778	0.197131	0.221736	0.442126	0.31931	0.381687	0.422086	0.612168	0.522783	0.537102	0.365294		0.713929	0.206273		2021-05-01	0.150477	0.133556	0.15642	2021-05-01	43.0508	39.0869		2021-05-01	15.8983	11.8243	26.0321	30.7568	26.7075	39.0869	24.9689	27.8823	26.8223	26.1031	39.083	26.8332	28.1408	33.9171	67.2984	41.142
2021-05-02	0.214335	0.182716	0.215052	0.223481	0.447539	0.318798	0.387338	0.42857	0.622158	0.531745	0.545762	0.374318		0.882534	0.206273		2021-05-02	0.150733	0.134994	0.162662	2021-05-02	43.3696	39.3764		2021-05-02	16.0978	11.9901	26.2447	30.9813	27.0319	39.3764	25.3137	28.3075	27.3065	26.523	39.6345	27.1643	28.4725	34.7996	67.5047	41.3684
2021-05-03	0.244342	0.187654	0.232973	0.225225	0.452951	0.318285	0.392989	0.435054	0.632148	0.540707	0.554423	0.383341		0.778586	0.206273		2021-05-03	0.150988	0.136432	0.168903	2021-05-03	43.6878	39.6653		2021-05-03	16.3252	12.1604	26.4751	31.2075	27.3602	39.6653	25.6636	28.7391	27.7985	26.95	40.1948	27.5036	28.8091	35.5782	67.711	41.5987
2021-05-04	0.274348	0.192593	0.250894	0.226969	0.458363	0.346643	0.398641	0.441538	0.642138	0.549669	0.563084	0.394989		0.728117	0.206273		2021-05-04	0.151244	0.137869	0.175144	2021-05-04	44.0345	39.9801		2021-05-04	16.5806	12.3351	26.7231	31.4355	27.6924	39.9801	26.0185	29.1771	28.2982	27.3841	40.7639	27.8535	29.1451	36.3063	67.9172	41.8932
2021-05-05	0.304355	0.197531	0.268815	0.228714	0.463775	0.375001	0.404292	0.448022	0.652128	0.558631	0.571745	0.406637		0.733296	0.222682		2021-05-05	0.1515	0.139307	0.181385	2021-05-05	44.4095	40.3205		2021-05-05	16.8639	12.5143	26.9889	31.6653	28.0286	40.3205	26.3785	29.6216	28.8058	27.8253	41.3417	28.214	29.4806	37.0396	68.1399	42.1451
2021-05-06	0.334362	0.202469	0.286737	0.230458	0.469187	0.403358	0.409943	0.454506	0.662118	0.567593	0.580405	0.418285		0.584978	0.222682		2021-05-06	0.151755	0.140745	0.253939	2021-05-06	44.8128	40.6868		2021-05-06	17.1751	12.698	27.2724	31.8968	28.3687	40.6868	26.7435	30.0725	29.3211	28.2735	41.9282	28.5851	29.8157	37.6246	68.3626	42.3543
2021-05-07	0.364369	0.207407	0.304658	0.232202	0.474599	0.431716	0.415595	0.46099	0.672108	0.576555	0.589066	0.429933		0.708033	0.222682		2021-05-07	0.152011	0.142183	0.326493	2021-05-07	45.2446	41.0787		2021-05-07	17.5142	12.8862	27.5736	32.1301	28.7127	41.0787	27.1135	30.5298	29.8442	28.7288	42.5235	28.9668	30.1502	38.3326	68.5853	42.5209
2021-05-08	0.394376	0.212346	0.322579	0.233946	0.480011	0.460074	0.421246	0.467474	0.682098	0.585517	0.597727	0.441581		0.846621	0.222682		2021-05-08	0.152267	0.143621	0.399047	2021-05-08	45.7046	41.4964		2021-05-08	17.8813	13.0789	27.8926	32.3651	29.0607	41.4964	27.4885	30.9935	30.3751	29.1912	43.1276	29.3592	30.4842	39.1793	68.808	42.6448
2021-05-09	0.424383	0.217284	0.3405	0.235691	0.485423	0.488431	0.426897	0.473958	0.692088	0.594479	0.606388	0.453229		0.742389	0.222682		2021-05-09	0.152523	0.145059	0.471601	2021-05-09	46.1931	41.9399		2021-05-09	18.2763	13.276	28.2292	32.6018	29.4125	41.9399	27.8686	31.4637	30.9137	29.6606	43.7404	29.7621	30.8178	39.9216	69.0307	42.7746
2021-05-10	0.45439	0.222222	0.358421	0.237435	0.490835	0.516789	0.432549	0.480442	0.702078	0.603441	0.615048	0.464877		0.742363	0.222682		2021-05-10	0.152778	0.146497	0.544155	2021-05-10	46.7099	42.4091		2021-05-10	18.6992	13.4777	28.5836	32.8403	29.7683	42.4091	28.2537	31.9403	31.4601	30.1372	44.3619	30.1756	31.1508	40.664	69.2533	42.9103
2021-05-11	0.484396	0.274074	0.358421	0.239179	0.496247	0.545147	0.4382	0.486925	0.712068	0.612403	0.623709	0.479161		0.846621	0.222682		2021-05-11	0.153034	0.147935	0.544155	2021-05-11	47.255	42.9041		2021-05-11	19.15	13.7263	28.938	33.0806	30.128	42.9041	28.6438	32.4234	32.0143	30.6208	44.9922	30.602	31.4833	41.5106	69.476	43.052
2021-05-12	0.514403	0.325926	0.358421	0.240924	0.501659	0.573504	0.443851	0.493409	0.722058	0.621365	0.63237	0.493445		0.396422	0.222682		2021-05-12	0.15329	0.149372	0.544155	2021-05-12	47.8285	43.4248		2021-05-12	19.6288	14.022	29.2924	33.3226	30.4917	43.4248	29.039	32.9129	32.5763	31.1115	45.6313	31.0412	31.8154	41.9071	69.6987	43.1995
2021-05-13	0.54441	0.377778	0.358421	0.242668	0.507072	0.601862	0.449503	0.499893	0.732048	0.630328	0.641031	0.507728		0.395845	0.222682		2021-05-13	0.153545	0.15081	0.544155	2021-05-13	48.4304	43.9712		2021-05-13	20.1355	14.3648	29.6467	33.5664	30.8592	43.9712	29.4392	33.4088	33.146	31.6092	46.2791	31.4933	32.1469	42.3029	69.9214	43.3529
2021-05-14	0.574417	0.42963	0.358421	0.244412	0.512484	0.63022	0.455154	0.506377	0.742038	0.63929	0.649691	0.522012		0.54812	0.222682		2021-05-14	0.153801	0.152248	0.544155	2021-05-14	49.0606	44.5434		2021-05-14	20.6702	14.7546	30.0011	33.8119	31.2307	44.5434	29.8444	33.9111	33.7236	32.1141	46.9357	31.9583	32.4779	42.851	70.1441	43.5122
2021-05-15	0.604424	0.481481	0.358421	0.246156	0.517896	0.658577	0.460805	0.512861	0.752028	0.648252	0.658352	0.536296		0.801608	0.222682		2021-05-15	0.154057	0.153686	0.544155	2021-05-15	49.7192	45.1413		2021-05-15	21.2327	15.1914	30.3555	34.0592	31.6061	45.1413	30.2546	34.4199	34.3089	32.626	47.601	32.4361	32.8085	43.6526	70.3668	43.6829
2021-05-16	0.634431	0.533333	0.358421	0.247901	0.523308	0.686935	0.466457	0.51734	0.762018	0.657214	0.667013	0.550397		0.494851	0.222682		2021-05-16	0.154312	0.155124	0.544155	2021-05-16	50.4061	45.765		2021-05-16	21.8232	15.6753	30.7099	34.3082	31.9854	45.765	30.6699	34.9331	34.9019	33.145	48.2751	32.9266	33.1385	44.1475	70.5894	43.865
2021-05-17	0.664438	0.585185	0.358421	0.249645	0.52872	0.715292	0.472108	0.521819	0.772008	0.666176	0.675674	0.564499		0.341218	0.222682		2021-05-17	0.154568	0.156562	0.544155	2021-05-17	51.1214	46.4145		2021-05-17	22.4416	16.2063	31.0643	34.559	32.3687	46.4145	31.0903	35.4508	35.5028	33.6711	48.9579	33.4297	33.4681	44.4887	70.8121	44.0584
2021-05-18	0.694444	0.637037	0.358421	0.251389	0.534132	0.74365	0.477759	0.526299	0.781998	0.675138	0.684334	0.5786		0.412765	0.222682		2021-05-18	0.154824	0.158	0.544155	2021-05-18	51.865	47.0896		2021-05-18	23.088	16.7843	31.4186	34.8116	32.7558	47.0896	31.5156	35.9729	36.1114	34.2042	49.6495	33.9456	33.7971	44.9015	71.0348	44.2632
2021-05-19	0.694444	0.688889	0.358421	0.253134	0.539544	0.772008	0.483411	0.530778	0.791988	0.6841	0.692995	0.589974		0.647339	0.222682		2021-05-19	0.15508	0.159437	0.544155	2021-05-19	52.637	47.7906		2021-05-19	23.7343	17.4093	31.773	35.0658	33.1469	47.7906	31.946	36.4995	36.7278	34.7445	50.3498	34.4716	34.1257	45.5488	71.2575	44.4794
2021-05-20	0.694444	0.740741	0.358421	0.254878	0.544956	0.800365	0.489062	0.535257	0.801978	0.693062	0.701656	0.601347		0.854267	0.222682		2021-05-20	0.155335	0.160875	0.544155	2021-05-20	53.4374	48.5172		2021-05-20	24.3807	18.0814	32.1274	35.3219	33.5419	48.5172	32.3814	37.0305	37.352	35.2918	51.0589	35.0077	34.4537	46.4031	71.4802	44.707
2021-05-21	0.694444	0.740741	0.358421	0.256622	0.550368	0.828723	0.494713	0.539736	0.811968	0.702024	0.681638	0.6054		0.691499	0.222682		2021-05-21	0.155591	0.162313	0.544155	2021-05-21	54.2661	49.2697		2021-05-21	25.0271	18.7534	32.4818	35.5797	33.9409	49.2697	32.8218	37.5659	37.9839	35.8462	51.7478	35.5471	34.7813	47.0946	71.7028	44.9041
2021-05-22	0.694444	0.740741	0.358421	0.258367	0.55578	0.857081	0.500365	0.544215	0.821958	0.710986	0.66162	0.609452		0.949568	0.222682		2021-05-22	0.155847	0.163751	0.544155	2021-05-22	55.1232	50.0478		2021-05-22	25.6734	19.4255	32.8361	35.8392	34.3437	50.0478	33.2673	38.1058	38.6236	36.4076	52.4164	36.0897	35.1083	48.0441	71.9255	45.0707
2021-05-23	0.694444	0.740741	0.358421	0.260111	0.561192	0.847751	0.506016	0.548695	0.831948	0.719948	0.641601	0.610079		0.678189	0.222682		2021-05-23	0.156102	0.165189	0.544155	2021-05-23	55.971	50.8175		2021-05-23	26.3198	20.0976	33.1905	36.1005	34.7505	50.8175	33.7178	38.6501	39.2711	36.9762	53.0648	36.6324	35.4907	48.7223	72.1482	45.2069
2021-05-24	0.694444	0.58642	0.358421	0.261855	0.566605	0.838421	0.511667	0.553174	0.841938	0.72891	0.621583	0.596676		1.02681	0.222682		2021-05-24	0.156358	0.166627	0.544155	2021-05-24	56.8094	51.5787		2021-05-24	26.9661	20.6296	33.5449	36.3635	35.1612	51.5787	34.1734	39.1989	39.9264	37.5518	53.693	37.1625	35.9285	49.7491	72.3709	45.3125
2021-05-25	0.694444	0.432099	0.358421	0.263599	0.572017	0.829091	0.517319	0.557653	0.851928	0.737872	0.601565	0.583273		0.725785	0.222682		2021-05-25	0.156614	0.168065	0.544155	2021-05-25	57.6385	52.3315		2021-05-25	27.6125	21.0217	33.8993	36.6283	35.5758	52.3315	34.6339	39.7521	40.5894	38.1345	54.3009	37.68	36.4216	50.4749	72.5936	45.5651
2021-05-26	0.694444	0.277778	0.40621	0.265344	0.577429	0.819762	0.52297	0.562132	0.861918	0.746834	0.581547	0.574215		0.966802	0.389364		2021-05-26	0.15687	0.169502	0.544155	2021-05-26	58.4582	53.0758		2021-05-26	28.2588	21.2737	34.3009	36.8949	35.9944	53.0758	35.0996	40.3098	41.2603	38.7243	54.8886	38.1892	36.9701	51.4417	72.9829	45.8369
2021-05-27	0.694444	0.335648	0.453999	0.267088	0.582841	0.810432	0.528621	0.566611	0.871908	0.755796	0.561529	0.584447		0.84982	0.389364		2021-05-27	0.157125	0.17094	0.544155	2021-05-27	59.2687	53.8116		2021-05-27	28.9052	21.5783	34.7498	37.1632	36.4169	53.8116	35.5702	40.8719	41.9389	39.3211	55.4561	38.7075	37.574	52.2915	73.3723	46.0941
2021-05-28	0.694444	0.393519	0.501789	0.268832	0.588253	0.801102	0.534273	0.57109	0.881898	0.764758	0.54151	0.594679		1.01821	0.389364		2021-05-28	0.157381	0.172378	0.544155	2021-05-28	60.0698	54.5389		2021-05-28	29.5515	21.9353	35.2459	37.4333	36.8433	54.5389	36.0459	41.4384	42.6252	39.925	56.0033	39.2351	38.2332	53.3097	73.7617	46.5251
2021-05-29	0.694444	0.451389	0.549578	0.270577	0.587224	0.791772	0.539924	0.57557	0.891888	0.77372	0.521492	0.604325		1.00192	0.389364		2021-05-29	0.157637	0.173816	0.544155	2021-05-29	60.8615	55.2578		2021-05-29	30.1979	22.3448	35.7893	37.7051	37.2689	55.2578	36.5266	42.0094	43.3194	40.536	56.5303	39.7714	38.9478	54.3117	74.151	46.8224
2021-05-30	0.694444	0.509259	0.597368	0.272321	0.586196	0.782443	0.545575	0.580049	0.901877	0.782682	0.501474	0.613972		0.86718	0.389364		2021-05-30	0.157892	0.175254	0.544155	2021-05-30	61.644	55.9682		2021-05-30	30.8442	22.8069	36.3799	37.9786	37.6938	55.9682	37.0123	42.5848	44.0213	41.1541	57.0371	40.3165	39.7178	55.1788	74.5404	46.9858
2021-05-31	0.694444	0.56713	0.696929	0.274065	0.585167	0.773113	0.551227	0.584528	0.911867	0.791644	0.481456	0.628325		0.923095	0.367209		2021-05-31	0.158148	0.176692	0.544155	2021-05-31	62.4171	56.6701		2021-05-31	31.4906	23.3214	37.069	38.2539	38.118	56.6701	37.503	43.1647	44.731	41.7793	57.5237	40.875	40.5431	56.1019	74.9076	47.1936
2021-06-01	0.694444	0.625	0.79649	0.27581	0.584139	0.763783	0.556878	0.589007	0.921857	0.800606	0.461438	0.642678		1.08959	0.367209		2021-06-01	0.158404	0.17813	0.544155	2021-06-01	63.1809	57.3636		2021-06-01	32.1369	23.8885	37.8565	38.531	38.5414	57.3636	37.9988	43.749	45.4485	42.4115	57.99	41.4469	41.4238	57.1915	75.2748	47.4459
2021-06-02	0.694444	0.68287	0.896052	0.296153	0.58311	0.751188	0.626006	0.593486	0.931847	0.809568	0.44142	0.664195		0.976174	0.367209		2021-06-02	0.190712	0.219429	0.544155	2021-06-02	63.9321	58.0456		2021-06-02	32.7833	24.5081	38.7425	38.8285	38.9641	58.0456	38.5562	44.3378	46.1737	43.0508	58.4361	42.0388	42.2938	58.1677	75.642	47.7707
2021-06-03	0.694444	0.740741	0.896052	0.316496	0.582082	0.738592	0.695135	0.597966	0.941837	0.81853	0.421401	0.676661		0.895318	0.367209		2021-06-03	0.223021	0.260729	0.544155	2021-06-03	64.6707	58.7162		2021-06-03	33.4296	25.1802	39.6284	39.1464	39.386	58.7162	39.1751	44.931	46.9067	43.6972	58.862	42.6417	43.1532	59.063	76.0092	48.1682
2021-06-04	0.694444	0.740741	0.896052	0.336839	0.581053	0.725997	0.764264	0.611821	0.951827	0.827492	0.401383	0.684719		0.876381	0.367209		2021-06-04	0.255329	0.302029	0.544155	2021-06-04	65.3967	59.3754		2021-06-04	34.076	25.8522	40.5143	39.4848	39.8072	59.3754	39.8555	45.538	47.6475	44.3507	59.2676	43.2517	44.0019	59.9394	76.3764	48.4998
2021-06-05	0.694444	0.740741	0.896052	0.357183	0.580025	0.713401	0.833392	0.625677	0.961817	0.836454	0.381365	0.692777		0.832494	0.174258		2021-06-05	0.287637	0.343328	0.544155	2021-06-05	66.1101	60.0231		2021-06-05	34.7223	26.5243	41.4003	39.8436	40.2276	60.0231	40.5975	46.1587	48.3961	45.0112	59.653	43.8689	44.84	60.7719	76.5507	48.7655
2021-06-06	0.694444	0.740741	0.896052	0.377526	0.578996	0.700806	0.902521	0.639533	0.960851	0.845416	0.361347	0.699839		0.814526	0.174258		2021-06-06	0.319946	0.384628	0.544155	2021-06-06	66.8109	60.6593		2021-06-06	35.3687	27.1964	42.2862	40.2229	40.6473	60.6593	41.401	46.7931	49.1439	45.6789	60.0182	44.4924	45.6674	61.5864	76.725	48.9655
2021-06-07	0.694444	0.864198	0.896052	0.397869	0.577968	0.688211	0.971649	0.653388	0.959884	0.854378	0.341329	0.718124		0.819074	0.174258		2021-06-07	0.352254	0.425928	0.544155	2021-06-07	67.4991	61.2842		2021-06-07	36.015	27.9805	43.1722	40.6225	41.0663	61.2842	42.266	47.4413	49.891	46.3536	60.3631	45.1323	46.4842	62.4055	76.8992	49.1405
2021-06-08	0.694444	0.987654	0.896052	0.418212	0.576939	0.675615	1.04078	0.667244	0.958917	0.86334	0.32131	0.73641		0.836343	0.174258		2021-06-08	0.384562	0.467227	0.544155	2021-06-08	68.1747	61.8976		2021-06-08	36.6614	28.8766	44.0581	41.0427	41.4845	61.8976	43.1927	48.1032	50.6373	47.0354	60.6878	45.7888	47.2903	63.2418	77.0735	49.2703
2021-06-09	0.694444	1.11111	0.896052	0.438556	0.57591	0.66302	1.10991	0.6811	0.957951	0.872302	0.301292	0.754695		0.978086	0.174258		2021-06-09	0.416871	0.508527	0.544155	2021-06-09	68.8377	62.4996		2021-06-09	37.3077	29.8847	44.9441	41.4832	41.9019	62.4996	44.1808	48.7789	51.3829	47.7242	60.9923	46.4618	48.0858	64.2199	77.2477	50.0416
2021-06-10	0.694444	1.11111	0.896052	0.458899	0.574882	0.650424	1.17903	0.694955	0.956984	0.881264	0.281274	0.761757		0.850026	0.174258		2021-06-10	0.449179	0.549827	0.544155	2021-06-10	69.4881	63.0901		2021-06-10	37.9541	30.8928	45.83	41.9442	42.3186	63.0901	45.2305	49.4683	52.1277	48.4201	61.2766	47.1412	48.8706	65.07	77.422	50.5515
2021-06-11	0.694444	1.11111	1.34408	0.479242	0.573853	0.683816	1.24816	0.708811	0.956017	0.890226	0.261256	0.813729		0.684488	0.174258		2021-06-11	0.481488	0.591126	0.544155	2021-06-11	70.172	63.711		2021-06-11	38.6004	31.9009	47.1589	42.4256	42.7346	63.711	46.3418	50.1715	52.8717	49.1231	61.5406	47.8709	49.6438	65.7544	77.5963	50.8705
2021-06-12	0.694444	1.11111	1.7921	0.499585	0.572825	0.717207	1.31729	0.722667	0.955051	0.899189	0.241238	0.865701		0.458037	0.174258		2021-06-12	0.513796	0.632426	0.544155	2021-06-12	70.8892	64.3621		2021-06-12	39.2468	32.909	48.9308	42.9275	43.1498	64.3621	47.5146	50.8884	53.615	49.8332	61.7844	48.6511	50.4053	66.2125	77.7705	51.0968
2021-06-13	0.694444	1.11111	1.7921	0.519929	0.571796	0.750598	1.38642	0.736522	0.954084	0.908151	0.22122	0.876944		0.659172	0.174258		2021-06-13	0.546104	0.673726	0.544155	2021-06-13	71.6398	65.0436		2021-06-13	39.8931	33.9171	50.7027	43.4498	43.5643	65.0436	48.7489	51.6191	54.3576	50.5504	62.0079	49.4413	51.1552	66.8716	77.9448	51.2304
2021-06-14	0.694444	1.11111	1.7921	0.540272	0.570768	0.78399	1.45555	0.750378	0.953117	0.917113	0.201201	0.888186		1.04301	0.174258		2021-06-14	0.578413	0.715025	0.544155	2021-06-14	72.4237	65.7554		2021-06-14	40.5395	34.9252	52.4746	43.9925	43.978	65.7554	50.0448	52.3635	55.0994	51.2746	62.2113	50.2417	51.8934	67.9147	78.119	51.3823
2021-06-15	0.694444	1.11111	1.7921	0.560615	0.569739	0.817381	1.52468	0.764234	0.952151	0.926075	0.181183	0.899429		0.970461	0.213905		2021-06-15	0.610721	0.756325	0.578165	2021-06-15	73.2411	66.4976		2021-06-15	41.1858	35.9334	54.2465	44.5557	44.391	66.4976	51.4022	53.1216	55.8404	52.006	62.3944	51.0522	52.62	68.8851	78.3329	51.5525
2021-06-16	0.694444	1.11111	1.7921	0.580958	0.591703	0.850772	1.43662	0.77809	0.939101	0.91506	0.19598	0.898722		0.914245	0.231038		2021-06-16	0.613302	0.746996	0.612175	2021-06-16	74.0919	67.27		2021-06-16	41.8322	36.9415	56.0184	45.1393	44.8199	67.27	52.6812	53.8935	56.5713	52.7286	62.5924	51.8626	53.3349	69.7994	78.564	52.5195
2021-06-17	0.694444	1.11111	1.7921	0.601302	0.613667	0.884164	1.34856	0.791945	0.926051	0.904045	0.210777	0.898016		0.673422	0.231038		2021-06-17	0.615882	0.737667	0.646185	2021-06-17	74.9761	68.0727		2021-06-17	42.4785	37.9496	57.7903	45.7433	45.2647	68.0727	53.8819	54.6792	57.2921	53.4425	62.8054	52.6727	54.0382	70.4728	78.795	53.2112
2021-06-18	0.694444	1.11111	1.7921	0.621645	0.635631	0.917555	1.2605	0.805801	0.913001	0.89303	0.225575	0.897309		0.471008	0.231038		2021-06-18	0.618463	0.728337	0.680194	2021-06-18	75.8936	68.9058		2021-06-18	43.1249	38.9577	59.5622	46.3678	45.7254	68.9058	55.0041	55.4786	58.0026	54.1477	63.0334	53.4827	54.7298	70.9438	79.026	53.6275
2021-06-19	0.694444	1.11111	0.597368	0.641988	0.657594	0.950946	1.17244	0.819657	0.899952	0.882015	0.240372	0.78799		0.760469	0.231038		2021-06-19	0.621043	0.719008	0.680194	2021-06-19	76.8446	69.7692		2021-06-19	43.7713	39.9658	60.1528	47.0127	46.2021	69.7692	56.0479	56.2917	58.7031	54.8443	63.2763	54.1852	55.4098	71.7043	79.2571	53.9922
2021-06-20	0.694444	1.11111	0.597368	0.662331	0.679558	0.984338	1.08439	0.833512	0.886902	0.871	0.255169	0.787284		0.982776	0.231038		2021-06-20	0.623624	0.709679	0.680194	2021-06-20	77.8289	70.6629		2021-06-20	44.4176	40.9739	60.7434	47.678	46.6947	70.6629	57.0134	57.1186	59.3933	55.5321	63.5342	54.8875	56.0781	72.687	79.4881	54.352
2021-06-21	0.694444	1.11111	0.597368	0.66193	0.701522	0.925468	0.996328	0.821237	0.873852	0.859985	0.269966	0.773928		0.297693	0.231038		2021-06-21	0.626204	0.700349	0.680194	2021-06-21	78.7544	71.5032		2021-06-21	45.064	41.982	61.3341	48.343	47.2032	71.5032	57.9004	57.9333	60.0734	56.2112	63.807	55.5777	56.7893	72.9847	79.7192	54.707
2021-06-22	0.694444	1.11111	0.597368	0.661529	0.723486	0.866598	0.908269	0.808961	0.860802	0.84897	0.284763	0.760573		0.662218	0.231038		2021-06-22	0.628785	0.69102	0.680194	2021-06-22	79.621	72.29		2021-06-22	45.7103	42.9901	61.9247	49.0075	47.7276	72.29	58.709	58.7358	60.7434	56.8816	64.0948	56.2559	57.5434	73.647	79.9502	55.3065
2021-06-23	0.694444	1.11111	0.597368	0.661127	0.74545	0.807728	0.820211	0.796686	0.847753	0.837955	0.29956	0.747218		0.914731	0.231038		2021-06-23	0.631365	0.681691	0.680194	2021-06-23	80.4287	73.0233		2021-06-23	46.3567	43.9983	62.5153	49.6716	48.2679	73.0233	59.4393	59.5262	61.4032	57.5434	64.3975	56.9221	58.3405	74.5617	80.1812	55.7809
2021-06-24	0.694444	1.11111	0.597368	0.660726	0.767413	0.748858	0.781191	0.78441	0.834703	0.826941	0.314357	0.73832		1.02768	0.231038		2021-06-24	0.633946	0.672362	0.680194	2021-06-24	81.1776	73.7032		2021-06-24	47.003	45.0064	63.1059	50.3354	48.8242	73.7032	60.1348	60.3043	62.0528	58.1964	64.7152	57.5802	59.1803	75.5894	80.4123	56.1301
2021-06-25	0.694444	1.11111	0.597368	0.660324	0.789377	0.689988	0.742171	0.772134	0.821653	0.815926	0.329155	0.729423		0.548143	0.231038		2021-06-25	0.636526	0.663032	0.680194	2021-06-25	81.8675	74.3297		2021-06-25	47.6494	46.0145	63.6966	50.9987	49.3964	74.3297	60.7955	61.0703	62.6923	58.8407	65.0478	58.2302	60.0631	76.1375	80.6433	56.6255
2021-06-26	0.694444	1.11111	0.597368	0.659923	0.811341	0.631118	0.703152	0.759859	0.861035	0.804911	0.343952	0.725292		0.537253	0.231038		2021-06-26	0.639107	0.653703	0.680194	2021-06-26	82.4987	74.9027		2021-06-26	48.2957	47.0226	64.2872	51.6616	49.9845	74.9027	61.4216	61.8241	63.3624	59.4764	65.3954	58.8758	60.9888	76.6748	80.8743	57.0706
2021-06-27	0.694444	1.11111	0.597368	0.659522	0.833305	0.572248	0.664132	0.747583	0.900417	0.793896	0.358749	0.721161		1.03018	0.231038		2021-06-27	0.641687	0.644374	0.680194	2021-06-27	83.0709	75.4223		2021-06-27	48.9421	48.0307	64.8778	52.3242	50.5885	75.4223	62.0128	62.5658	64.0632	60.1033	65.758	59.5172	61.9573	77.7049	81.1054	57.4655
2021-06-28	0.868056	1.66667	0.597368	0.65912	0.855269	0.513378	0.625112	0.735308	0.939799	0.782881	0.373546	0.783318		0.886475	0.231038		2021-06-28	0.644268	0.635044	0.680194	2021-06-28	83.5843	75.8884		2021-06-28	49.75	49.5429	65.4685	52.9863	51.2085	75.8884	62.5694	63.2952	64.7947	60.7215	66.1355	60.2146	62.9688	78.5914	81.3364	58.9368
2021-06-29	1.04167	2.22222	0.597368	0.658719	0.877232	0.511348	0.586092	0.723032	0.979181	0.764034	0.388343	0.849931		0.604047	0.231038		2021-06-29	0.646848	0.625715	0.680194	2021-06-29	84.0956	76.3526		2021-06-29	50.7195	51.5591	66.0591	53.648	51.8443	76.3526	63.0912	64.0125	65.5567	61.3249	66.5279	60.9724	63.9318	79.1955	81.5675	60.1156
2021-06-30	1.21528	2.22222	0.597368	0.658317	0.899196	0.509318	0.547072	0.710756	1.01856	0.745187	0.40314	0.866038		0.571034	0.231038		2021-06-30	0.649429	0.616386	0.680194	2021-06-30	84.605	76.8151		2021-06-30	51.8506	53.5753	66.6497	54.3093	52.4961	76.8151	63.5783	64.7176	66.3495	61.9134	66.9353	61.7446	64.8465	79.7665	81.7985	61.0019
2021-07-01	1.38889	2.22222	0.597368	0.657916	0.92116	0.507287	0.508053	0.698481	1.05795	0.72634	0.417937	0.882145		0.487456	0.231038		2021-07-01	0.652009	0.607056	1.02029	2021-07-01	85.1122	77.2756		2021-07-01	53.1434	55.5915	67.2404	54.9702	53.1638	77.2756	64.0306	65.4105	67.1729	62.487	67.3577	62.5312	65.7128	80.2539	82.0295	61.5958
2021-07-02	1.38889	2.22222	0.597368	0.657514	0.943124	0.505257	0.469033	0.686205	1.09733	0.707492	0.432735	0.88247		0.371287	0.231038		2021-07-02	0.65459	0.597727	1.36039	2021-07-02	85.6175	77.7344		2021-07-02	54.4361	57.6078	67.831	55.6307	53.8475	77.7344	64.4482	66.0913	68.0269	63.0457	67.795	63.3177	66.5306	80.6252	82.2606	61.8972
2021-07-03	1.38889	2.22222	0.597368	0.657113	0.965088	0.503227	0.430013	0.67393	1.13671	0.688645	0.447532	0.882794		0.356817	0.231038		2021-07-03	0.65717	0.588398	1.20923	2021-07-03	86.1207	78.1913		2021-07-03	55.7288	59.624	68.4216	56.2908	54.547	78.1913	64.831	66.7598	68.9116	63.5895	68.2473	64.1039	67.3001	80.9821	82.4916	62.2039
2021-07-04	2.08333	2.22222	0.597368	0.656712	0.987051	0.501196	0.390993	0.661654	1.17609	0.669798	0.462329	0.94625		0.348492	0.231038		2021-07-04	0.659751	0.579069	1.05808	2021-07-04	86.6219	78.6463		2021-07-04	57.6678	61.6402	69.0122	56.9505	55.2625	78.6463	65.1791	67.4162	69.8269	64.1184	68.7145	64.9486	68.0212	81.3305	82.7226	62.8285
2021-07-05	2.77778	2.22222	0.597368	0.65631	1.00902	0.499166	0.386204	0.651321	1.10413	0.650951	0.477126	1.00287		0.475673	0.231038		2021-07-05	0.662331	0.569739	0.906926	2021-07-05	87.1211	79.0995		2021-07-05	60.2532	63.6564	69.6029	57.6098	55.9939	79.0995	65.5229	68.0624	70.6863	64.6325	69.1967	65.847	68.6939	81.8062	82.9537	63.1827
2021-07-06	2.77778	2.22222	0.597368	0.655909	1.03266	0.497136	0.381415	0.640987	1.03217	0.632104	0.469416	0.994469		0.422653	0.231038		2021-07-06	0.66185	0.581086	0.906926	2021-07-06	87.6182	79.5509		2021-07-06	62.8386	65.6727	70.1935	58.2687	56.7424	79.5509	65.8625	68.6983	71.4896	65.1317	69.6711	66.7382	69.3182	82.2289	83.1847	63.5148
2021-07-07	2.77778	2.22222	0.597368	0.655507	1.0563	0.495106	0.376626	0.630654	0.960206	0.613257	0.461706	0.986066		0.802976	0.231038		2021-07-07	0.661368	0.592433	0.906926	2021-07-07	88.1133	80.0004		2021-07-07	65.424	67.6889	70.7841	58.9272	57.5081	80.0004	66.1978	69.3239	72.2369	65.6159	70.1377	67.6223	69.8941	83.0318	83.4158	63.8249
2021-07-08	2.77778	2.22222	0.597368	0.655106	1.07994	0.493075	0.371837	0.62032	0.888244	0.59441	0.453996	0.977663		0.617637	0.231038		2021-07-08	0.660886	0.60378	0.906926	2021-07-08	88.6064	80.4481		2021-07-08	68.0094	69.7051	71.3748	59.5853	58.2909	80.4481	66.5289	69.9393	72.9282	66.0853	70.5965	68.4993	70.4216	83.6495	83.6468	64.1654
2021-07-09	2.77778	2.22222	0.597368	0.652554	1.10358	0.499954	0.367048	0.609987	0.816283	0.575563	0.446286	0.969875		0.424177	0.231038		2021-07-09	0.660405	0.615127	0.906926	2021-07-09	89.1064	80.902		2021-07-09	70.5948	71.7213	71.9654	60.2408	59.0908	80.902	66.8557	70.5444	73.5635	66.5399	71.0475	69.3697	70.9474	84.0737	83.8778	64.5309
2021-07-10	2.77778	2.22222	0.597368	0.650002	1.12722	0.506834	0.362258	0.599653	0.744321	0.556715	0.438577	0.962086		0.366615	0.231038		2021-07-10	0.659923	0.626474	0.906926	2021-07-10	89.6132	81.3622		2021-07-10	73.1803	73.7376	72.556	60.8938	59.9079	81.3622	67.1782	71.1393	74.1428	66.9795	71.4907	70.2335	71.4714	84.4403	84.1089	64.9213
2021-07-11	2.77778	2.22222	0.597368	0.64745	1.15087	0.513713	0.357469	0.589319	0.672359	0.590889	0.430867	0.959118		0.506798	0.231038		2021-07-11	0.659441	0.637821	0.906926	2021-07-11	90.1269	81.8286		2021-07-11	75.7657	75.7538	73.1467	61.5442	60.7421	81.8286	67.4964	71.7239	74.6661	67.4461	71.9261	71.0945	71.9937	84.9471	84.3399	65.3784
2021-07-12	2.77778	2.22222	0.597368	0.644899	1.17451	0.520592	0.35268	0.578986	0.600397	0.625062	0.423157	0.95615		0.49242	0.231038		2021-07-12	0.65896	0.649168	0.906926	2021-07-12	90.6475	82.3013		2021-07-12	78.3511	77.77	73.7373	62.192	61.5935	82.3013	67.8104	72.2983	75.1334	67.9397	72.3538	71.9528	72.5143	85.4395	84.5709	65.8289
2021-07-13	1.38889	2.22222	0.597368	0.642347	1.19815	0.527471	0.347891	0.568652	0.528436	0.659236	0.415447	0.826919		0.472335	0.231038		2021-07-13	0.658478	0.660515	0.906926	2021-07-13	91.175	82.7802		2021-07-13	79.6438	79.7862	74.3279	62.8373	62.4619	82.7802	68.1202	72.8624	75.5447	68.4603	72.7736	72.6908	73.0331	85.9118	84.802	66.5082
2021-07-14	1.38889	2.22222	0.597368	0.639795	1.22179	0.534351	0.343102	0.558319	0.509496	0.693409	0.407737	0.828771		0.453179	0.231038		2021-07-14	0.657996	0.671862	0.906926	2021-07-14	91.7093	83.2653		2021-07-14	80.9365	81.8025	74.9185	63.48	63.3476	83.2653	68.4256	73.4163	75.9412	69.0079	73.1857	73.4297	73.5502	86.365	85.033	67.0922
2021-07-15	1.38889	2.22222	0.597368	0.637243	1.24543	0.54123	0.338312	0.547985	0.490557	0.727582	0.400027	0.830623		0.349338	0.231038		2021-07-15	0.657514	0.683209	0.906926	2021-07-15	92.2505	83.7567		2021-07-15	82.2292	83.8187	75.5092	64.1201	64.2503	83.7567	68.7268	73.9599	76.323	69.5825	73.5899	74.1697	74.0655	86.7143	85.2641	67.5809
2021-07-16	1.15741	2.22222	0.597368	0.634691	1.26907	0.548109	0.333523	0.537652	0.471618	0.761756	0.392317	0.811431		0.47551	0.231038		2021-07-16	0.657033	0.694556	0.906926	2021-07-16	92.7987	84.2543		2021-07-16	83.3064	85.8349	76.0998	64.7577	65.1702	84.2543	69.0238	74.4933	76.6901	70.184	73.9864	74.891	74.5792	87.1899	85.4951	67.9743
2021-07-17	0.925926	2.22222	0.597368	0.632139	1.24485	0.554988	0.328734	0.527318	0.452679	0.795929	0.384607	0.787888		0.513492	0.217387		2021-07-17	0.656551	0.705903	0.906926	2021-07-17	93.3536	84.7582		2021-07-17	84.1682	87.8511	76.6904	65.3927	66.0726	84.7582	69.3164	75.0164	77.0424	70.8126	74.3751	75.5906	75.091	87.7033	85.7125	68.2725
2021-07-18	0.802469	1.11111	0.597368	0.629588	1.22063	0.561868	0.323945	0.526965	0.43374	0.830102	0.376897	0.674062		0.464361	0.217387		2021-07-18	0.656069	0.71725	0.906926	2021-07-18	93.9155	85.2684		2021-07-18	84.9151	88.8593	77.2811	66.0252	66.9573	85.2684	69.6049	75.5392	77.3799	71.4681	74.756	76.1868	75.6012	88.1677	85.9299	68.4754
2021-07-19	0.679012	0.666667	0.597368	0.627036	1.19641	0.568747	0.319156	0.526612	0.4148	0.864276	0.369187	0.620843		0.251341	0.217387		2021-07-19	0.655588	0.728597	0.906926	2021-07-19	94.4843	85.7848		2021-07-19	85.5471	89.4641	77.8717	66.6551	67.8246	85.7848	69.889	76.0616	77.7028	72.1506	75.1291	76.7346	76.1095	88.419	86.1473	68.7113
2021-07-20	0.555556	0.222222	0.597368	0.624484	1.17219	0.575626	0.314367	0.526259	0.395861	0.898449	0.361478	0.567624		0.275656	0.217387		2021-07-20	0.655106	0.739944	0.906926	2021-07-20	95.0599	86.3074		2021-07-20	86.0642	89.6657	78.4623	67.2824	68.6742	86.3074	70.1689	76.5837	78.0109	72.8601	75.4944	77.234	76.6162	88.6947	86.3646	68.9469
2021-07-21	0.513889	0.213889	0.597368	0.639946	1.14797	0.552515	0.337117	0.525905	0.376922	0.932623	0.353768	0.562901		0.364802	0.217387		2021-07-21	0.652919	0.745365	0.906926	2021-07-21	95.6124	86.809		2021-07-21	86.5425	89.8598	79.053	67.9252	69.5064	86.809	70.469	77.1054	78.3042	73.5966	75.8519	77.7294	77.1294	89.0595	86.582	69.1821
2021-07-22	0.472222	0.205556	0.597368	0.655409	1.12375	0.529404	0.359867	0.525552	0.357983	0.966796	0.346058	0.558179		0.294992	0.217387		2021-07-22	0.650731	0.750786	0.906926	2021-07-22	96.1418	87.2897		2021-07-22	86.982	90.0463	79.6436	68.5836	70.3209	87.2897	70.7894	77.6268	78.5828	74.3601	76.2016	78.2206	77.6491	89.3545	86.7994	69.5818
2021-07-23	0.430556	0.197222	0.597368	0.670872	1.09953	0.506292	0.382617	0.525199	0.339044	1.00097	0.338348	0.553456		0.276126	0.217387		2021-07-23	0.648544	0.756206	0.906926	2021-07-23	96.6481	87.7494		2021-07-23	87.3828	90.2252	80.2342	69.2576	71.1179	87.7494	71.1301	78.1478	78.8467	75.1506	76.5435	78.7078	78.1753	89.6306	87.0168	70.0909
2021-07-24	0.388889	0.188889	0.597368	0.686334	1.07531	0.483181	0.405367	0.524845	0.320105	1.03514	0.330638	0.548734		0.226147	0.217387		2021-07-24	0.646357	0.761627	0.906926	2021-07-24	97.1313	88.188		2021-07-24	87.7447	90.3966	80.8248	69.947	71.8974	88.188	71.491	78.6685	79.0958	75.968	76.8777	79.1909	78.7081	89.8568	87.2342	70.5764
2021-07-25	0.347222	0.180556	0.597368	0.701797	1.05109	0.46007	0.428118	0.524492	0.301165	0.996465	0.322928	0.537388		0.417199	0.217387		2021-07-25	0.64417	0.767047	0.906926	2021-07-25	97.5914	88.6058		2021-07-25	88.0679	90.5604	81.4155	70.652	72.6593	88.6058	71.8721	79.1888	79.3302	76.7549	77.204	79.6646	79.2473	90.274	87.4516	71.0383
2021-07-26	0.347222	0.172222	0.597368	0.717259	1.1301	0.436959	0.450868	0.524139	0.282226	0.957787	0.315218	0.539216		0.326286	0.256821		2021-07-26	0.641982	0.772468	0.906926	2021-07-26	98.0283	89.0025		2021-07-26	88.3911	90.7167	82.0061	71.3725	73.4784	89.0025	72.2735	79.7088	79.5499	77.5113	77.5226	80.1394	79.7931	90.6003	87.7084	71.3517
2021-07-27	0.347222	0.163889	0.597368	0.732722	1.20912	0.413847	0.473618	0.523786	0.263287	0.919109	0.307508	0.541043		0.511032	0.256821		2021-07-27	0.639795	0.777889	1.13366	2021-07-27	98.4422	89.3782		2021-07-27	88.7142	90.8654	82.5967	72.1086	74.3549	89.3782	72.6952	80.2284	79.7548	78.2371	77.8334	80.6152	80.3455	91.1113	87.9652	71.5166
2021-07-28	0.347222	0.155556	0.597368	0.748185	1.28813	0.390736	0.496368	0.523432	0.244348	0.88043	0.312434	0.544019		0.357203	0.256821		2021-07-28	0.637608	0.783309	1.36039	2021-07-28	98.8329	89.733		2021-07-28	89.0374	91.0065	83.1874	72.8602	75.2886	89.733	73.1371	80.7476	79.945	78.9324	78.1491	81.0931	80.9043	91.4685	88.222	72.0831
2021-07-29	0.347222	0.147222	0.597368	0.763647	1.36714	0.367625	0.519118	0.523079	0.272661	0.841752	0.31736	0.55129		0.213073	0.256821		2021-07-29	0.63542	0.78873	1.36039	2021-07-29	99.2005	90.0668		2021-07-29	89.3606	91.1401	83.778	73.6273	76.2795	90.0668	73.5993	81.2666	80.1572	79.5971	78.4698	81.5766	81.4697	91.6816	88.4789	72.6367
2021-07-30	0.347222	0.138889	0.597368	0.77911	1.44615	0.344513	0.541869	0.522726	0.300974	0.803074	0.322286	0.558562		0.292137	0.256821		2021-07-30	0.633233	0.794151	1.36039	2021-07-30	99.545	90.3796		2021-07-30	89.6838	91.2661	84.3686	74.4099	77.3278	90.3796	74.0817	81.7851	80.3914	80.2313	78.7955	82.0655	82.0416	91.9737	88.7357	73.1774
2021-07-31	0.347222	0.136521	0.597368	0.794572	1.52516	0.321402	0.564619	0.522373	0.329288	0.764396	0.327212	0.566376		0.486602	0.256821		2021-07-31	0.631046	0.799571	1.36039	2021-07-31	99.8664	90.6714		2021-07-31	90.0069	91.39	84.9593	75.2081	78.4333	90.6714	74.5844	82.3033	80.6477	80.8349	79.1262	82.5605	82.62	92.4603	88.9925	73.7052
2021-08-01	0.347222	0.134154	0.597368	0.810035	1.60418	0.298291	0.587369	0.522019	0.357601	0.725718	0.332137	0.57419		0.277497	0.256821		2021-08-01	0.628858	0.804992	1.36039	2021-08-01	100.165	90.9422		2021-08-01	90.3301	91.5117	85.5499	76.0219	79.5961	90.9422	75.1073	82.8212	80.926	81.408	79.4618	83.0615	83.205	92.7378	89.2493	74.2201
2021-08-02	0.347222	0.131787	0.597368	0.825498	1.68319	0.275179	0.610119	0.514378	0.385914	0.730405	0.337063	0.585284		0.294243	0.256821		2021-08-02	0.626671	0.810412	1.19034	2021-08-02	100.44	91.192		2021-08-02	90.6533	91.6313	86.1405	76.8511	80.8162	91.192	75.6505	83.3315	81.2264	81.9848	79.8025	83.5709	83.7965	93.032	89.5061	74.3609
2021-08-03	0.353423	0.129419	0.597368	0.84096	1.7622	0.27209	0.63287	0.506736	0.414228	0.735092	0.341989	0.598761		0.311338	0.256821		2021-08-03	0.624484	0.815833	1.02029	2021-08-03	100.712	91.4391		2021-08-03	90.9822	91.7487	86.7312	77.6959	82.0935	91.4391	76.214	83.8342	81.5488	82.5653	80.1481	84.091	84.3725	93.3434	89.763	74.5557
2021-08-04	0.359623	0.127052	0.597368	0.821983	1.59454	0.269	0.65562	0.499095	0.442541	0.739778	0.346915	0.586683		0.243107	0.256821		2021-08-04	0.642524	0.81354	0.850243	2021-08-04	100.981	91.6833		2021-08-04	91.317	91.864	87.3218	78.5216	83.2493	91.6833	76.7977	84.3293	81.8932	83.1495	80.4987	84.6023	84.9331	93.5865	90.0198	75.0565
2021-08-05	0.365823	0.124684	0.597368	0.803006	1.42687	0.265911	0.67837	0.491453	0.470854	0.744465	0.351841	0.574604		0.251272	0.256821		2021-08-05	0.660563	0.811247	0.680194	2021-08-05	101.247	91.9247		2021-08-05	91.6574	91.9771	87.9124	79.3283	84.2836	91.9247	77.4016	84.8169	82.2597	83.7374	80.8542	85.1049	85.4783	93.8378	90.2766	75.4292
2021-08-06	0.372024	0.122317	0.597368	0.784029	1.25921	0.262822	0.70112	0.483812	0.499168	0.749151	0.356767	0.562526		0.433173	0.256821		2021-08-06	0.678603	0.808954	0.652987	2021-08-06	101.51	92.1634		2021-08-06	92.0037	92.0881	88.503	80.1159	85.1964	92.1634	78.0259	85.2968	82.6482	84.329	81.2148	85.5986	86.008	94.2709	90.5334	75.6739
2021-08-07	0.378224	0.119949	0.597368	0.765052	1.09154	0.259732	0.72387	0.47617	0.527481	0.753838	0.361692	0.550447		0.462189	0.256821		2021-08-07	0.696643	0.806661	0.625779	2021-08-07	101.769	92.3992		2021-08-07	92.3557	92.1969	89.0937	80.8844	85.9876	92.3992	78.6703	85.7692	83.0587	84.9243	81.5803	86.0837	86.5223	94.7331	90.7903	76.0533
2021-08-08	0.384425	0.117582	0.597368	0.746075	0.923879	0.256643	0.746621	0.468528	0.555794	0.758525	0.366618	0.538369		0.252292	0.256821		2021-08-08	0.714682	0.804369	0.598571	2021-08-08	102.026	92.6322		2021-08-08	92.7135	92.3036	89.6843	81.6339	86.6572	92.6322	79.335	86.234	83.4913	85.5234	81.9508	86.5599	87.0212	94.9854	91.0471	76.4006
2021-08-09	0.390625	0.115215	0.597368	0.727098	0.756215	0.253553	0.735323	0.460887	0.584108	0.748782	0.371544	0.521883		0.253106	0.256821		2021-08-09	0.732722	0.802076	0.571363	2021-08-09	102.28	92.8624		2021-08-09	93.0771	92.4081	90.2749	82.3643	87.2054	92.8624	79.9897	86.6912	83.9459	86.1147	82.3263	87.0236	87.5046	95.2385	91.3039	76.716
2021-08-10	0.396825	0.112847	0.597368	0.708121	0.588551	0.250464	0.724025	0.453245	0.612421	0.73904	0.37647	0.505398		0.569697	0.256821		2021-08-10	0.750762	0.799783	0.544155	2021-08-10	102.53	93.0898		2021-08-10	93.4465	92.5105	90.8656	83.0756	87.632	93.0898	80.6343	87.1409	84.4225	86.6983	82.7067	87.4748	87.9726	95.8082	91.5607	77.1444
2021-08-11	0.361022	0.11048	0.597368	0.689144	0.562752	0.247374	0.712728	0.445604	0.640734	0.729297	0.381396	0.497991		0.391565	0.256821		2021-08-11	0.768801	0.79749	0.544155	2021-08-11	102.777	93.3144		2021-08-11	93.7825	92.6108	91.4562	83.7679	88.0399	93.3144	81.2689	87.5829	84.9212	87.2742	83.0922	87.9192	88.4251	96.1998	91.8175	77.4682
2021-08-12	0.325218	0.108112	0.597368	0.670167	0.536952	0.244285	0.70143	0.437962	0.669047	0.719555	0.386322	0.490583		0.520824	0.256821		2021-08-12	0.786841	0.795197	0.544155	2021-08-12	103.022	93.5362		2021-08-12	94.0852	92.7088	92.0468	84.4411	88.4291	93.5362	81.8933	88.0174	85.4419	87.8424	83.4826	88.3568	88.8623	96.7206	92.0744	77.6875
2021-08-13	0.289414	0.105745	0.517719	0.65119	0.511153	0.241195	0.690133	0.430321	0.697361	0.709812	0.391247	0.475935		0.204188	0.256821		2021-08-13	0.804881	0.792904	0.544155	2021-08-13	103.263	93.7552		2021-08-13	94.3545	92.8048	92.5587	85.0953	88.7997	93.7552	82.5078	88.4443	85.9846	88.403	83.878	88.7805	89.2839	96.9248	92.3312	78.6362
2021-08-14	0.25361	0.103378	0.43807	0.632213	0.485353	0.238106	0.678835	0.422679	0.725674	0.70007	0.396173	0.461287		0.165629	0.256821		2021-08-14	0.82292	0.790611	0.544155	2021-08-14	103.501	93.9714		2021-08-14	94.5906	92.8986	92.9918	85.7304	89.1515	93.9714	83.1121	88.8636	86.5494	88.9558	84.2783	89.1903	89.6902	97.0904	92.588	78.7747
2021-08-15	0.217806	0.10101	0.358421	0.613236	0.459554	0.235016	0.667538	0.415038	0.753987	0.690327	0.401099	0.446639		0.351032	0.256821		2021-08-15	0.84096	0.788319	0.544155	2021-08-15	103.736	94.1847		2021-08-15	94.7933	92.9902	93.3462	86.3464	89.4846	94.1847	83.7065	89.2754	87.1362	89.501	84.6837	89.5862	90.081	97.4415	92.8448	78.9304
2021-08-16	0.182003	0.100627	0.309138	0.595062	0.433754	0.231927	0.65624	0.407744	0.729284	0.680585	0.406025	0.430217		0.302121	0.256821		2021-08-16	0.823443	0.800669	0.516948	2021-08-16	103.968	94.3953		2021-08-16	94.9627	93.0815	93.6519	86.9442	89.799	94.3953	84.2907	89.6799	87.7038	90.0384	85.094	89.9674	90.4564	97.7436	93.1016	79.8481
2021-08-17	0.146199	0.100245	0.259855	0.576888	0.407955	0.228837	0.644943	0.400451	0.704581	0.670842	0.401982	0.41298		0.435516	0.236138		2021-08-17	0.805926	0.81302	0.48974	2021-08-17	104.197	94.6031		2021-08-17	95.0988	93.1725	93.9088	87.5237	90.0947	94.6031	84.8649	90.0771	88.2522	90.5682	85.5003	90.3331	90.8163	98.1791	93.3378	80.1025
2021-08-18	0.145814	0.0998623	0.210572	0.558715	0.382155	0.225748	0.633645	0.393158	0.679878	0.6611	0.39794	0.398962		0.303245	0.237628		2021-08-18	0.788408	0.82537	0.462532	2021-08-18	104.423	94.808		2021-08-18	95.2345	93.2631	94.117	88.0849	90.3717	94.808	85.429	90.4672	88.7813	91.0903	85.9024	90.6863	91.1608	98.4823	93.5754	80.4949
2021-08-19	0.145429	0.0994796	0.161289	0.540541	0.356356	0.222658	0.622348	0.385865	0.655174	0.621438	0.393897	0.382225		0.268327	0.237628		2021-08-19	0.770891	0.837721	0.435324	2021-08-19	104.645	95.0102		2021-08-19	95.3699	93.3533	94.2765	88.6279	90.63	95.0102	85.9831	90.8499	89.2913	91.581	86.3005	91.0249	91.4899	98.7507	93.813	80.9632
2021-08-20	0.145045	0.099097	0.112006	0.522368	0.330556	0.219569	0.61105	0.378571	0.630471	0.581776	0.389855	0.365488		0.2262	0.237628		2021-08-20	0.753374	0.850072	0.408117	2021-08-20	104.865	95.2095		2021-08-20	95.5049	93.4433	94.3872	89.1527	90.8696	95.2095	86.5271	91.2255	89.7819	92.0404	86.6945	91.3488	91.8035	98.9769	94.0507	81.442
2021-08-21	0.14466	0.0987144	0.112473	0.504194	0.319498	0.216479	0.600366	0.371278	0.605768	0.542114	0.385813	0.354669		0.342721	0.237628		2021-08-21	0.735856	0.862422	0.380909	2021-08-21	105.081	95.4061		2021-08-21	95.6395	93.5328	94.4984	89.6592	91.1012	95.4061	87.0617	91.5938	90.2534	92.4685	87.0844	91.6635	92.1017	99.3196	94.2883	81.9312
2021-08-22	0.144275	0.0983318	0.11294	0.486021	0.30844	0.21339	0.589683	0.363985	0.581064	0.502452	0.38177	0.34385		0.184072	0.237628		2021-08-22	0.718339	0.874773	0.353701	2021-08-22	105.295	95.5998		2021-08-22	95.7738	93.622	94.6101	90.1474	91.3248	95.5998	87.5867	91.9549	90.7056	92.8653	87.4702	91.9691	92.3844	99.5037	94.5259	82.4308
2021-08-23	0.14389	0.0979492	0.113407	0.467847	0.297381	0.206219	0.578999	0.356692	0.556361	0.46279	0.377728	0.33266		0.18862	0.237628		2021-08-23	0.700822	0.887123	0.326493	2021-08-23	105.501	95.7871		2021-08-23	95.9077	93.7109	94.7222	90.6174	91.5403	95.7871	88.1021	92.3088	91.1387	93.2308	87.8519	92.2653	92.6642	99.6923	94.7636	82.9092
2021-08-24	0.143506	0.0975666	0.113873	0.449673	0.286323	0.199048	0.568316	0.349398	0.531658	0.423129	0.373685	0.32147		0.159247	0.203332		2021-08-24	0.683305	0.899474	0.299286	2021-08-24	105.7	95.9678		2021-08-24	96.0413	93.7994	94.8348	91.0691	91.7479	95.9678	88.6081	92.6554	91.5524	93.5649	88.2295	92.5519	92.9409	99.8515	94.9669	83.3665
2021-08-25	0.143121	0.097184	0.11434	0.4315	0.275265	0.191877	0.557632	0.342105	0.506955	0.383467	0.369643	0.310281		0.148474	0.00851856		2021-08-25	0.665787	0.911825	0.272078	2021-08-25	105.892	96.142		2021-08-25	96.1745	93.8876	94.9478	91.5026	91.9474	96.142	89.1046	92.9948	91.947	93.8677	88.6031	92.829	93.2146	100	94.9754	84.3405
2021-08-26	0.142736	0.0968013	0.114807	0.413326	0.264206	0.184706	0.546949	0.332935	0.482251	0.343805	0.3656	0.29892			0.00851856		2021-08-26	0.64827	0.924175	0.269829	2021-08-26	106.077	96.3097		2021-08-26	96.3073	93.9754	95.0613	91.9178	92.1389	96.3097	89.5915	93.3251	92.3223	94.1393	88.9726	93.0965	93.4852		94.9839	85.1713
2021-08-27	0.142351	0.0964187	0.115273	0.395153	0.253148	0.177535	0.536265	0.323764	0.457548	0.304143	0.361558	0.28756			0.00851856		2021-08-27	0.630753	0.936526	0.267581	2021-08-27	106.254	96.4709		2021-08-27	96.4398	94.0629	95.1753	92.3147	92.3224	96.4709	90.069	93.6462	92.6784	94.3794	89.338	93.3543	93.7529		94.9924	85.859
2021-08-28	0.141967	0.0960361	0.11574	0.376979	0.242089	0.170364	0.525582	0.314594	0.432845	0.264481	0.357515	0.276199			0.00851856		2021-08-28	0.613236	0.948876	0.265332	2021-08-28	106.424	96.6256		2021-08-28	96.572	94.15	95.2898	92.6934	92.4979	96.6256	90.5369	93.9583	93.0153	94.5883	89.6993	93.6024	94.0175		95.001	86.4511
2021-08-29	0.141582	0.0956535	0.116207	0.364254	0.231031	0.163193	0.514898	0.305423	0.408141	0.224819	0.353473	0.265334			0.00851856		2021-08-29	0.602963	0.918747	0.263083	2021-08-29	106.588	96.7737		2021-08-29	96.7037	94.2368	95.4046	93.0593	92.6654	96.7737	90.9953	94.2613	93.333	94.7658	90.0565	93.8414	94.2791		95.0095	86.9476
2021-08-30	0.141197	0.0952709	0.116673	0.351528	0.219973	0.156023	0.504214	0.296253	0.383438	0.185158	0.34943	0.254469			0.00851856		2021-08-30	0.592691	0.888617	0.260835	2021-08-30	106.744	96.9154		2021-08-30	96.8352	94.3233	95.52	93.4124	92.8248	96.9154	91.4442	94.5552	93.6314	94.9121	90.4096	94.0712	94.5377		95.018	87.3484
2021-08-31	0.140813	0.0948883	0.11714	0.338803	0.219973	0.148852	0.493531	0.287083	0.373718	0.183332	0.345388	0.249411			0.00851856		2021-08-31	0.582419	0.858487	0.258586	2021-08-31	106.893	97.0505		2021-08-31	96.9662	94.4094	95.6358	93.7528	92.9843	97.0505	91.8836	94.84	93.9222	95.0568	90.7586	94.2964	94.7932		95.0265	87.6537
2021-09-01	0.140428	0.0945057	0.117607	0.326078	0.219973	0.141681	0.482847	0.277912	0.363998	0.181507	0.341345	0.244353			0.00851856		2021-09-01	0.572147	0.828357	0.256338	2021-09-01	107.034	97.1792		2021-09-01	97.0969	94.4951	95.7521	94.0804	93.1437	97.1792	92.3135	95.1157	94.2055	95.2002	91.1036	94.5169	95.0457		95.035	87.8633
2021-09-02	0.140043	0.094123	0.118073	0.313353	0.219973	0.13451	0.472164	0.268742	0.354277	0.179682	0.337303	0.239295			0.00851856		2021-09-02	0.561875	0.798228	0.254089	2021-09-02	107.169	97.3013		2021-09-02	97.2273	94.5805	95.8688	94.3951	93.3032	97.3013	92.7339	95.3823	94.4813	95.3421	91.4445	94.7327	95.2952		95.0435	87.9772
2021-09-03	0.139658	0.0937404	0.11854	0.300627	0.219973	0.127339	0.46148	0.259571	0.344557	0.177856	0.333261	0.234237			0.00851856		2021-09-03	0.551603	0.768098	0.251841	2021-09-03	107.296	97.4169		2021-09-03	97.3573	94.6656	95.986	94.6971	93.4626	97.4169	93.1447	95.6398	94.7494	95.4825	91.7813	94.9439	95.5417		95.0521	88.5796
2021-09-04	0.139274	0.0933578	0.119007	0.287902	0.219973	0.120168	0.450797	0.250401	0.334837	0.176031	0.329218	0.229179			0.00851856		2021-09-04	0.541331	0.737968	0.249592	2021-09-04	107.416	97.526		2021-09-04	97.4869	94.7503	96.1037	94.9863	93.6221	97.526	93.5461	95.8882	95.01	95.6215	92.114	95.1505	95.7852		95.0606	89.0887
2021-09-05	0.138889	0.0929752	0.119474	0.275177	0.219973	0.112997	0.440113	0.24123	0.325117	0.174206	0.325176	0.224121			0.00851856		2021-09-05	0.531059	0.707838	0.247343	2021-09-05	107.529	97.6286		2021-09-05	97.6162	94.8346	96.2218	95.2628	93.7815	97.6286	93.9379	96.1276	95.2631	95.7591	92.4426	95.3523	96.0256		95.0691	89.5045
2021-09-06	0.134049	0.0925926	0.118333	0.262451	0.219973	0.105826	0.423109	0.23206	0.315397	0.17238	0.321133	0.217937			0.00851856		2021-09-06	0.520787	0.677709	0.241778	2021-09-06	107.635	97.7247		2021-09-06	97.7409	94.9186	96.3388	95.5264	93.9409	97.7247	94.3146	96.3578	95.5085	95.8952	92.7671	95.5485	96.263		95.0776	89.8419
2021-09-07	0.129209	0.0979938	0.117193	0.249726	0.219973	0.0986554	0.406105	0.222889	0.305676	0.170555	0.317091	0.212279			0.00851856		2021-09-07	0.510515	0.647579	0.236213	2021-09-07	107.734	97.8143		2021-09-07	97.8612	95.0075	96.4547	95.7773	94.1004	97.8143	94.6762	96.5789	95.7464	96.0299	93.0876	95.7395	96.4974		95.0861	90.1008
2021-09-08	0.12437	0.103395	0.116052	0.237001	0.219973	0.0914845	0.389101	0.213719	0.295956	0.16873	0.313048	0.206621			0.00851856		2021-09-08	0.500243	0.617449	0.230648	2021-09-08	107.825	97.8973		2021-09-08	97.9769	95.1013	96.5695	96.0154	94.2598	97.8973	95.0226	96.7909	95.9768	96.1632	93.4039	95.9252	96.7287		95.0947	90.2813
2021-09-09	0.11953	0.108796	0.114912	0.224275	0.219973	0.0843136	0.372097	0.204549	0.286236	0.166905	0.309006	0.200963			0.00851856		2021-09-09	0.489971	0.587319	0.225082	2021-09-09	107.909	97.9739		2021-09-09	98.0882	95.2001	96.6831	96.2406	94.4193	97.9739	95.3539	96.9938	96.1996	96.295	93.7162	96.1058	96.9571		95.1032	90.4435
2021-09-10	0.11469	0.114198	0.113771	0.21155	0.219973	0.0771427	0.355093	0.195378	0.276516	0.165079	0.304963	0.195305			0.00851856		2021-09-10	0.479699	0.55719	0.219517	2021-09-10	107.987	98.0439		2021-09-10	98.1949	95.3037	96.7956	96.4532	94.5787	98.0439	95.67	97.1876	96.4148	96.4253	94.0244	96.2811	97.1824		95.1117	90.9379
2021-09-11	0.10985	0.119599	0.112631	0.198825	0.219973	0.0699718	0.338089	0.186208	0.266796	0.163254	0.300921	0.189647			0.00851856		2021-09-11	0.469427	0.52706	0.213952	2021-09-11	108.057	98.1074		2021-09-11	98.2972	95.4122	96.9069	96.6529	94.7382	98.1074	95.971	97.3724	96.6224	96.5542	94.3285	96.4512	97.4047		95.1202	91.3416
2021-09-12	0.105011	0.125	0.111491	0.186099	0.219973	0.0628009	0.321085	0.177037	0.257075	0.161429	0.296878	0.183989			0.00851856		2021-09-12	0.459155	0.49693	0.208387	2021-09-12	108.119	98.1645		2021-09-12	98.3949	95.5256	97.0172	96.8398	94.8976	98.1645	96.2569	97.548	96.8225	96.6817	94.6285	96.6161	97.6239		95.1287	91.6546
2021-09-13	0.100171	0.130401	0.11035	0.173374	0.219973	0.0628237	0.304081	0.167867	0.247355	0.159603	0.288952	0.178632			0.00851856		2021-09-13	0.448883	0.4668	0.202822	2021-09-13	108.182	98.2215		2021-09-13	98.4882	95.6439	97.1263	97.014	95.0571	98.2215	96.5276	97.7145	97.015	96.8078	94.9205	96.776	97.8224		95.1373	92.0455
2021-09-14	0.0953312	0.135802	0.10921	0.160649	0.219973	0.0628466	0.287077	0.158696	0.237635	0.157778	0.281026	0.173275			0.00851856		2021-09-14	0.438611	0.436671	0.197256	2021-09-14	108.245	98.2786		2021-09-14	98.5769	95.7671	97.2342	97.1754	95.2165	98.2786	96.7832	97.872	97.1999	96.9324	95.2045	96.931	98.0002		95.1458	92.657
2021-09-15	0.0904915	0.141204	0.108069	0.147923	0.219973	0.0628694	0.270073	0.149526	0.229671	0.155953	0.2731	0.168078			0.00851856		2021-09-15	0.428339	0.406541	0.191691	2021-09-15	108.308	98.3356		2021-09-15	98.6611	95.8952	97.3411	97.324	95.376	98.3356	97.0236	98.0203	97.3787	97.0555	95.4805	97.0811	98.1571		95.1543	93.1809
2021-09-16	0.0856518	0.146605	0.106929	0.135198	0.219973	0.0628922	0.253069	0.140355	0.221707	0.154128	0.265174	0.16288			0.00851856		2021-09-16	0.418067	0.376411	0.186126	2021-09-16	108.371	98.3927		2021-09-16	98.7408	96.0282	97.4468	97.4598	95.5354	98.3927	97.2489	98.1595	97.5513	97.1772	95.7485	97.2263	98.2933		95.1628	93.6172
2021-09-17	0.080812	0.152006	0.105788	0.122473	0.219973	0.0629151	0.236066	0.131185	0.213743	0.152302	0.257248	0.157683			0.00851856		2021-09-17	0.407795	0.346281	0.180561	2021-09-17	108.434	98.4499		2021-09-17	98.816	96.1662	97.5514	97.5828	95.6949	98.4499	97.4591	98.2897	97.7176	97.2975	96.0085	97.3667	98.4087		95.1713	93.9658
2021-09-18	0.0759723	0.157407	0.104648	0.109747	0.219973	0.0629379	0.219062	0.122015	0.205779	0.150477	0.249322	0.152485			0.00851856		2021-09-18	0.397523	0.316151	0.174995	2021-09-18	108.497	98.507		2021-09-18	98.8868	96.309	97.6549	97.6931	95.8543	98.507	97.6541	98.4107	97.8778	97.4163	96.2605	97.5022	98.5034		95.1798	94.2268
2021-09-19	0.0711325	0.162809	0.103508	0.097022	0.219973	0.0629607	0.202058	0.112844	0.197815	0.148652	0.241396	0.147288			0.00851856		2021-09-19	0.387251	0.286022	0.16943	2021-09-19	108.56	98.5642		2021-09-19	98.953	96.4567	97.7572	97.7905	96.0138	98.5642	97.834	98.5227	98.0317	97.5337	96.5044	97.6329	98.5773		95.1884	94.8515
2021-09-20	0.0662928	0.16821	0.102367	0.0842967	0.219973	0.0629836	0.185054	0.103674	0.18985	0.146826	0.23347	0.142091			0.00851856		2021-09-20	0.376979	0.255892	0.163865	2021-09-20	108.623	98.6214		2021-09-20	99.0147	96.6093	97.8584	97.8752	96.1732	98.6214	97.9988	98.6255	98.1795	97.6497	96.7404	97.7587	98.6304		95.1969	95.3638
2021-09-21	0.0614531	0.173611	0.101227	0.0846035	0.219973	0.0630064	0.16805	0.0945033	0.181886	0.145001	0.225544	0.138078			0.00851856		2021-09-21	0.374283	#DIV/0!	0.1583	2021-09-21	108.686	98.6786		2021-09-21	99.0719	96.7668	97.9585	97.9602	96.3327	98.6786	98.1484	98.7193	98.321	97.7642	96.9683	97.8809	98.6838		95.2054	95.7639
2021-09-22	0.0566133	0.179012	0.100086	0.0849104	0.219973	0.0630293	0.151046	0.0853328	0.173922	0.143176	0.217619	0.134065			0.00851856		2021-09-22	0.371586	#DIV/0!	0.152735	2021-09-22	108.749	98.7358		2021-09-22	99.1245	96.9292	98.0575	98.0455	96.4921	98.7358	98.2829	98.8039	98.4564	97.8772	97.1882	97.9994	98.7375		95.2139	96.109
2021-09-23	0.0517736	0.184414	0.098946	0.0852172	0.219973	0.0630521	0.134042	0.0761624	0.165958	0.14135	0.209693	0.130053			0.00851856		2021-09-23	0.368889	#DIV/0!	0.147169	2021-09-23	108.812	98.793		2021-09-23	99.1727	97.0966	98.1553	98.1311	96.6516	98.793	98.4022	98.8795	98.5856	97.9889	97.4001	98.1142	98.7916		95.2224	96.3925
2021-09-24	0.0469338	0.189815	0.0978055	0.085524	0.219973	0.0630749	0.117038	0.0669919	0.157994	0.139525	0.201767	0.12604			0.042815		2021-09-24	0.366193	#DIV/0!	0.141604	2021-09-24	108.875	98.8503		2021-09-24	99.2164	97.2688	98.252	98.217	96.811	98.8503	98.5064	98.9459	98.7085	98.099	97.604	98.2254	98.846		95.2653	96.6143
2021-09-25	0.0420941	0.195216	0.0966651	0.0858308	0.219973	0.0630978	0.100034	0.0578215	0.15003	0.1377	0.193841	0.122027			0.232665		2021-09-25	0.363496	#DIV/0!	0.136039	2021-09-25	108.938	98.9076		2021-09-25	99.2556	97.4459	98.3476	98.3032	96.9705	98.9076	98.5955	99.0033	98.8253	98.2078	97.7999	98.3329	98.9007		95.4979	96.7746
2021-09-26	0.0420941	0.200617	0.0955247	0.0861377	0.219973	0.0631206	0.0830298	0.048651	0.142066	0.135875	0.185915	0.118455			0.232665		2021-09-26	0.360799	#DIV/0!	0.134301	2021-09-26	109.001	98.9649		2021-09-26	99.2948	97.6279	98.442	98.3898	97.1299	98.9649	98.6694	99.0516	98.9359	98.3151	97.9878	98.4372	98.9557		95.7306	96.9123
2021-09-27	0.0420941	0.206019	0.0943843	0.0864445	0.219973	0.0631435	0.0830298	0.0491208	0.134102	0.134049	0.177989	0.117304			0.232665		2021-09-27	0.358103	#DIV/0!	0.132563	2021-09-27	109.064	99.0222		2021-09-27	99.334	97.8148	98.5353	98.4766	97.2894	99.0222	98.7433	99.1003	99.0402	98.4209	98.1677	98.5404	99.011		95.9632	97.0277
2021-09-28	0.0420941	0.21142	0.0932439	0.0867513	0.219973	0.0631663	0.0830298	0.0495905	0.126138	0.132224	0.170063	0.116154			0.232665		2021-09-28	0.355406	#DIV/0!	0.130825	2021-09-28	109.127	99.0796		2021-09-28	99.3731	98.0067	98.6275	98.5637	97.4488	99.0796	98.8172	99.1495	99.1384	98.5254	98.3395	98.6427	99.0666		96.1959	97.1206
2021-09-29	0.0420941	0.216821	0.0921034	0.0870581	0.219973	0.0631891	0.0830298	0.0500602	0.118174	0.130399	0.162137	0.115003			0.232665		2021-09-29	0.352709	#DIV/0!	0.129087	2021-09-29	109.191	99.1369		2021-09-29	99.4123	98.2034	98.7186	98.6512	97.6083	99.1369	98.8912	99.1992	99.2304	98.6283	98.5034	98.7439	99.1226		96.4286	97.2116
2021-09-30	0.0420941	0.222222	0.090963	0.087365	0.219973	0.063212	0.0830298	0.0505299	0.11021	0.128573	0.154211	0.113853			0.232665		2021-09-30	0.350013	#DIV/0!	0.12735	2021-09-30	109.254	99.1943		2021-09-30	99.4515	98.405	98.8085	98.739	97.7677	99.1943	98.9651	99.2493	99.3161	98.7299	98.6592	98.8442	99.1789		96.6612	97.3009
2021-10-01	0.0420941	0.208151	0.0898226	0.0876718	0.219973	0.0632348	0.0830298	0.0509996	0.102246	0.126748	0.146285	0.110932			0.232665		2021-10-01	0.347316	#DIV/0!	0.125612	2021-10-01	109.317	99.2517		2021-10-01	99.4907	98.5939	98.8973	98.827	97.9272	99.2517	99.039	99.2999	99.3957	98.83	98.8071	98.9418	99.2355		96.8939	97.3883
2021-10-02	0.0420941	0.194079	0.0886822	0.0879786	0.219973	0.0632576	0.0830298	0.0514693	0.0942816	0.124923	0.138359	0.108012			0.232665		2021-10-02	0.34462	#DIV/0!	0.123874	2021-10-02	109.38	99.3092		2021-10-02	99.5299	98.77	98.985	98.9154	98.0866	99.3092	99.1129	99.3509	99.4691	98.9286	98.9469	99.0368	99.2924		97.1266	97.474
2021-10-03	0.0420941	0.180008	0.0875418	0.0882854	0.219973	0.0632805	0.0830298	0.0519391	0.0863175	0.123097	0.130433	0.105091			0.232665		2021-10-03	0.341923	#DIV/0!	0.122136	2021-10-03	109.443	99.3666		2021-10-03	99.569	98.9333	99.0716	99.0041	98.2461	99.3666	99.1869	99.4025	99.5363	99.0258	99.0787	99.1292	99.3496		97.3592	97.5578
2021-10-04	0.0420941	0.165937	0.0864013	0.0885923	0.219973	0.0633033	0.0830298	0.0524088	0.0783534	0.121272	0.122507	0.10217			0.232665		2021-10-04	0.339226	#DIV/0!	0.120398	2021-10-04	109.507	99.4241		2021-10-04	99.6082	99.0838	99.157	99.0931	98.4055	99.4241	99.2608	99.4545	99.5973	99.1216	99.2025	99.2189	99.4071		97.5919	97.6398
2021-10-05	0.0420941	0.151865	0.0852609	0.0888991	0.219973	0.0633262	0.0830298	0.0528785	0.0703893	0.119447	0.114581	0.0992494			0.24081		2021-10-05	0.33653	#DIV/0!	0.11866	2021-10-05	109.57	99.4816		2021-10-05	99.6474	99.2216	99.2413	99.1824	98.565	99.4816	99.3347	99.5069	99.652	99.2159	99.3183	99.3061	99.465		97.8327	97.7971
2021-10-06	0.0420941	0.137794	0.0797286	0.0892059	0.219973	0.063349	0.0830298	0.0533482	0.0624253	0.117622	0.106655	0.0959294			0.24081		2021-10-06	0.333833	#DIV/0!	0.116923	2021-10-06	109.633	99.5391		2021-10-06	99.6866	99.3466	99.3256	99.272	98.7244	99.5391	99.4086	99.5598	99.7006	99.3088	99.4261	99.3908	99.5232		98.0735	97.9983
2021-10-07	0.0420941	0.123722	0.0741963	0.0895127	0.219973	0.0633718	0.0830298	0.0538179	0.0544612	0.115796	0.0987286	0.0926094			0.24081		2021-10-07	0.331136	#DIV/0!	0.115185	2021-10-07	109.697	99.5967		2021-10-07	99.7257	99.4589	99.4099	99.3619	98.8839	99.5967	99.4825	99.6132	99.743	99.4003	99.5259	99.4729	99.5817		98.3143	98.2435
2021-10-08	0.0420941	0.109651	0.068664	0.0898195	0.219973	0.0633947	0.0830298	0.0542877	0.0464971	0.113971	0.0908027	0.0892895			0.24081		2021-10-08	0.32844	#DIV/0!	0.113447	2021-10-08	109.76	99.6542		2021-10-08	99.7649	99.5584	99.4942	99.4522	99.0433	99.6542	99.5565	99.6671	99.7792	99.4903	99.6176	99.5525	99.6405		98.5551	98.5328
2021-10-09	0.0420941	0.0955796	0.0631317	0.0901264	0.219973	0.0634175	0.0830298	0.0547574	0.0467212	0.112146	0.0828767	0.0867139			0.24081		2021-10-09	0.325743	#DIV/0!	0.111709	2021-10-09	109.824	99.7118		2021-10-09	99.8041	99.6451	99.5785	99.5427	99.2028	99.7118	99.6304	99.7214	99.8156	99.5788	99.7014	99.6302	99.6996		98.796	98.7908
2021-10-10	0.0420941	0.0815082	0.0575994	0.0904332	0.219973	0.0634404	0.0830298	0.0552271	0.0469452	0.11032	0.0749507	0.0841383			0.24081		2021-10-10	0.323046	#DIV/0!	0.109971	2021-10-10	109.887	99.7694		2021-10-10	99.8433	99.7191	99.6628	99.6335	99.3622	99.7694	99.7043	99.7762	99.8521	99.6659	99.7771	99.706	99.7591		99.0368	99.0176
2021-10-11	0.0420941	0.0798702	0.0520671	0.09074	0.219973	0.0634632	0.0830298	0.0556968	0.0471693	0.108495	0.0670247	0.082693			0.24081		2021-10-11	0.32035	#DIV/0!	0.108233	2021-10-11	109.951	99.827		2021-10-11	99.8825	99.7915	99.7471	99.7247	99.5217	99.827	99.7782	99.8314	99.8888	99.7516	99.8449	99.7809	99.8188		99.2776	99.2342
2021-10-12	0.0420941	0.0782322	0.0465348	0.0910468	0.219973	0.063486	0.0830298	0.0561665	0.0473933	0.10667	0.0590987	0.0812477			0.24081		2021-10-12	0.317653	#DIV/0!	0.106496	2021-10-12	110.014	99.8847		2021-10-12	99.9216	99.8625	99.8314	99.8162	99.6811	99.8847	99.8522	99.8872	99.9257	99.8359	99.9046	99.8548	99.8789		99.5184	99.4408
2021-10-13	0.0420941	0.0765941	0.0410026	0.0913537	0.219973	0.0635089	0.0830298	0.0566362	0.0476174	0.104844	0.0511727	0.0798024			0.24081		2021-10-13	0.314957	#DIV/0!	0.104758	2021-10-13	110.078	99.9423		2021-10-13	99.9608	99.932	99.9157	99.9079	99.8406	99.9423	99.9261	99.9433	99.9628	99.9186	99.9563	99.9279		99.7592	99.6373
2021-10-14	0.0420941	0.0749561	0.0354703	0.0916605	0.219973	0.0635317	0.0830298	0.057106	0.0478414	0.103019	0.0432467	0.0783571			0.24081		2021-10-14	0.31226	#DIV/0!	0.10302	2021-10-14	110.141	100		2021-10-14	100	100	100	100	100	100	100	100	100	100	100	100		100	99.8237
																																								100

## Sheet: Norwegian Trench isotope data
Locality	Shell ID	Sample no.	Sampling method	Tray	Tray no.	Distance to previous (mm)	Total growth (mm)	Annual growth (%)	δ¹³C (‰)	δ¹³C sdev (‰)	δ¹⁸O (‰)	δ¹⁸O sdev (‰)	Increment	Year				ontogenetic age	calendar year	increment width (um)	starting gl at (mm)
Norwegian Trench	MOL8216_08VN16-A1L	1	surface milling	IV (Bernd)	D3			0	0.599896	0.0179309	2.33271	0.0626562	2	1903				2	1903/04	5215.37
Norwegian Trench	MOL8216_08VN16-A1L	2	surface milling	IV (Bernd)	D2			0.0941308	0.254742	0.0342285	2.17225	0.0278622	2	1903				3	1904/05	4245.37
Norwegian Trench	MOL8216_08VN16-A1L	3	surface milling	IV (Bernd)	D1	0.498403		0.1831	0.445537	0.0239527	2.48341	0.116483	2	1903				4	1905/06	2484.31
Norwegian Trench	MOL8216_08VN16-A1L	4	surface milling	IV (Bernd)	C15	0.443742		0.264518	0.711533	0.0303774	2.47197	0.0767864	2	1903				5	1906/07	1796.56
Norwegian Trench	MOL8216_08VN16-A1L	5	surface milling	IV (Bernd)	C14	0.418444		0.353235	0.793222	0.0240076	2.55311	0.0454231	2	1903				6	1907/08
Norwegian Trench	MOL8216_08VN16-A1L	6	surface milling	IV (Bernd)	C13	0.521033		0.457721	1.19979	0.0199333	2.45096	0.0497544	2	1903
Norwegian Trench	MOL8216_08VN16-A1L	7	surface milling	IV (Bernd)	C12	0.585435		0.547069	1.64019	0.0101103	2.7231	0.0349356	2	1903
Norwegian Trench	MOL8216_08VN16-A1L	8	surface milling	IV (Bernd)	C11	0.360724		0.610879	1.73258	0.032843	2.59973	0.0436847	2	1903
Norwegian Trench	MOL8216_08VN16-A1L	9	surface milling	IV (Bernd)	C10	0.314996		0.675894	1.7052	0.0217058	2.64722	0.0434941	2	1903
Norwegian Trench	MOL8216_08VN16-A1L	10	surface milling	IV (Bernd)	C9	0.373483		0.741159	1.72953	0.0301439	2.73371	0.0321675	2	1903
Norwegian Trench	MOL8216_08VN16-A1L	11	surface milling	IV (Bernd)	C8	0.317648		0.804034	1.59452	0.0249637	2.57963	0.0428793	2	1903
Norwegian Trench	MOL8216_08VN16-A1L	12	surface milling	IV (Bernd)	C7	0.348167		0.870416	1.55454	0.016895	2.63503	0.0440622	2	1903
Norwegian Trench	MOL8216_08VN16-A1L	13	surface milling	IV (Bernd)	C6	0.354797		0.935927	1.48173	0.0202406	2.58241	0.0479395	2	1903
Norwegian Trench	MOL8216_08VN16-A1L	14	surface milling	IV (Bernd)	C5	0.338942		0	1.15455	0.0189085	2.49295	0.0428681	2	1903
Norwegian Trench	MOL8216_08VN16-A1L	15	surface milling	IV (Bernd)	C4	0.33956		0.0470107	0.923736	0.0304019	2.3673	0.0666241	2	1904
Norwegian Trench	MOL8216_08VN16-A1L	16	surface milling	IV (Bernd)	C3	0.19821		0.100341	1.38041	0.0328109	2.64903	0.0609009	3	1904
Norwegian Trench	MOL8216_08VN16-A1L	17	surface milling	IV (Bernd)	C2	0.251497		0.161346	1.4554	0.0194302	2.66754	0.0603699	3	1904
Norwegian Trench	MOL8216_08VN16-A1L	18	surface milling	IV (Bernd)	C1	0.262937		0.225311	1.32183	0.029949	2.67292	0.0569679	3	1904
Norwegian Trench	MOL8216_08VN16-A1L	19	surface milling	IV (Bernd)	B15	0.276446		0.292143	1.4469	0.0169231	2.73424	0.0424109	3	1904
Norwegian Trench	MOL8216_08VN16-A1L	20	surface milling	IV (Bernd)	B14	0.28712		0.361197	1.57768	0.00905859	2.70479	0.0336101	3	1904
Norwegian Trench	MOL8216_08VN16-A1L	21	surface milling	IV (Bernd)	B13	0.295182		0.432125	1.61336	0.0436644	2.82409	0.0982616	3	1904
Norwegian Trench	MOL8216_08VN16-A1L	22	surface milling	IV (Bernd)	B12	0.302923		0.505068	1.81999	0.0195424	2.74329	0.0704485	3	1904
Norwegian Trench	MOL8216_08VN16-A1L	23	surface milling	IV (Bernd)	B11	0.312173		0.582334	2.08898	0.0165726	2.7708	0.0521211	3	1904
Norwegian Trench	MOL8216_08VN16-A1L	24	surface milling	IV (Bernd)	B10	0.33937		0.661362	2.22649	0.0182938	2.76341	0.0576445	3	1904
Norwegian Trench	MOL8216_08VN16-A1L	25	surface milling	IV (Bernd)	B9	0.327041		0.734144	2.26213	0.0251406	2.68736	0.0613667	3	1904
Norwegian Trench	MOL8216_08VN16-A1L	26	surface milling	IV (Bernd)	B8	0.286694		0.805122	2.25439	0.0273796	2.71186	0.0509181	3	1904
Norwegian Trench	MOL8216_08VN16-A1L	27	surface milling	IV (Bernd)	B7	0.311833		0.87517	2.19964	0.027481	2.51923	0.045007	3	1904
Norwegian Trench	MOL8216_08VN16-A1L	28	surface milling	IV (Bernd)	B6	0.278854		0.938916	1.98317	0.00989451	2.63389	0.035784	3	1904
Norwegian Trench	MOL8216_08VN16-A1L	29	surface milling	IV (Bernd)	B5	0.258686		0	1.79768	0.0177319	2.65123	0.0405112	4	1905
Norwegian Trench	MOL8216_08VN16-A1L	30	surface milling	IV (Bernd)	B4	0.256407		0.111218	1.1492	0.0269199	2.41382	0.0248612	4	1905
Norwegian Trench	MOL8216_08VN16-A1L	31	surface milling	IV (Bernd)	B3	0.275028		0.212434	1.78915	0.0244688	2.81306	0.0706712	4	1905
Norwegian Trench	MOL8216_08VN16-A1L	32	surface milling	IV (Bernd)	B2	0.225559		0.295944	1.94239	0.0251185	2.7764	0.0427918	4	1905
Norwegian Trench	MOL8216_08VN16-A1L	33	surface milling	IV (Bernd)	B1	0.187461		0.376328	2.22904	0.0135349	2.77194	0.0779485	4	1905
Norwegian Trench	MOL8216_08VN16-A1L	34	surface milling	IV (Bernd)	A15	0.210094		0.474816	2.24343	0.0226913	2.76553	0.041731	4	1905
Norwegian Trench	MOL8216_08VN16-A1L	35	surface milling	IV (Bernd)	A14	0.277001		0.573303	2.28504	0.0141668	2.808	0.0554235	4	1905
Norwegian Trench	MOL8216_08VN16-A1L	36	surface milling	IV (Bernd)	A13	0.210094		0.665692	2.23259	0.0215432	2.69271	0.0594165	4	1905
Norwegian Trench	MOL8216_08VN16-A1L	37	surface milling	IV (Bernd)	A12	0.246834		0.765947	2.20437	0.0378014	2.77852	0.0719241	4	1905
Norwegian Trench	MOL8216_08VN16-A1L	38	surface milling	IV (Bernd)	A11	0.249001		0.878029	2.20415	0.017886	2.76427	0.0723604	4	1905
Norwegian Trench	MOL8216_08VN16-A1L	39	surface milling	IV (Bernd)	A10	0.305329		1	2.07799	0.0324202	2.69718	0.0820718	4	1905
Norwegian Trench	MOL8216_08VN16-A1L	40	surface milling	IV (Bernd)	A9	0.297908		1	1.30413	0.0341048	2.56803	0.0602968	5	1906
Norwegian Trench	MOL8216_08VN16-A1L	41	surface milling	IV (Bernd)	A8	0.227973			1.52482	0.0220625	2.78038	0.0719867	5	1906
Norwegian Trench	MOL8216_08VN16-A1L	42	surface milling	IV (Bernd)	A7	0.187115			1.99434	0.0278474	2.66534	0.0530058	5	1906
Norwegian Trench	MOL8216_08VN16-A1L	43	surface milling	IV (Bernd)	A6	0.375687			2.22181	0.031183	2.77723	0.0417122	5	1906
Norwegian Trench	MOL8216_08VN16-A1L	44	surface milling	IV (Bernd)	A5	0.3844			2.12396	0.0357292	2.7613	0.0665085	5	1906
Norwegian Trench	MOL8216_08VN16-A1L	45	surface milling	IV (Bernd)	A4	0.313474			2.06832	0.0255345	2.65976	0.0708183	5	1906
Norwegian Trench	MOL8216_08VN16-A1L	46	surface milling	IV (Bernd)	A3	0.307911			1.49216	0.0296509	2.57432	0.056807	5	1907
Norwegian Trench	MOL8216_08VN16-A1L	47	surface milling	IV (Bernd)	A2				1.08834	0.0123583	2.57151	0.0418	6
Norwegian Trench	MOL8216_08VN16-A1L	48	surface milling	IV (Bernd)	A1				1.43338	0.0309872	2.58182	0.0580525

## Sheet: Norwegian Trench calculation
d18O(s, pred)			d18O(w)	0.1			shallow?	MOL8216_08VN16-A1L		yr x1	yr x2			shell			498.403	-498.403			ann incr%	time%									date	daily growth%	daily growth%	cumul growth%		shallow?	198.21	5017.16			ann incr%	time%
arbitrary date	SST	d18O(s)reco		arbitrary date	interpolated d18O(s)		distance from hinge (mm)	sample#	d13C	Date				d18O			date	distance	milling width	cumulative milling	s%	t%	#days	Date	d18O	%ann incr/d		Date	%ann incr/d			interpolated	cumul	normalized			date	distance	milling width	cumulative milling	s%	t%	#days	Date	d18O	%ann incr/d		Date	%ann incr/d
2020-07-15	6.42319	3.09655		2020-07-16	3.09694			1	0.599896	2020-11-15				2.33271			2021-01-20	0	498.403	0	0	0	0	2021-01-20	2.33271	0.192104		2021-01-20	0.159544		2021-02-15	0.299688	0.299688	0.291146			2021-01-20	5215.37	198.21	0	0	0	0	2021-01-20	2.3673	0.0587634		2021-01-20	0.0587634
2020-08-15	6.3708	3.10862		2020-07-17	3.09732		0	2	0.254742	2021-01-20				2.17225		249.202	2021-03-10	498.403	498.403	498.403	9.41308	13.4247	49	2021-03-10	2.17225	0.286997		2021-03-10	0.423662		2021-02-16	0.305078	0.604766	0.587529			2021-04-10	5413.58	198.21	198.21	4.70107	21.9178	80	2021-04-10	2.64903	0.253952		2021-04-10	0.253952
2020-09-15	6.55421	3.06636		2020-07-18	3.09771		498.403	3	0.445537	2021-03-10				2.48341		221.871	2021-04-10	942.145	443.742	969.476	18.31	21.9178	80	2021-04-10	2.48341	0.387706		2021-04-10	0.387706		2021-02-17	0.310468	0.915234	0.889148			2021-05-01	5665.08	251.497	423.063	10.0341	27.6712	101	2021-05-01	2.66754	0.435755		2021-05-01	0.435755
2020-10-15	6.76819	3.01705		2020-07-19	3.0981		942.145	4	0.711533	2021-04-10				2.47197		209.222	2021-05-01	1360.59	418.444	1400.57	26.4518	27.6712	101	2021-05-01	2.47197	0.422462		2021-05-01	0.422462		2021-02-18	0.315858	1.23109	1.196			2021-05-15	5928.02	262.937	680.28	16.1346	31.5068	115	2021-05-15	2.67292	0.639644		2021-05-15	0.639644
2020-11-15	7.12921	2.93387		2020-07-20	3.09849		1360.59	5	0.793222	2021-05-01				2.55311		260.516	2021-05-22	1881.62	521.033	1870.31	35.3235	33.4247	122	2021-05-22	2.55311	0.497554		2021-05-22	0.497554		2021-02-19	0.321249	1.55234	1.5081			2021-05-25	6204.46	276.446	949.971	22.5311	34.2466	125	2021-05-25	2.73424	0.318249		2021-05-25	0.318249
2020-12-15	7.39189	2.87334		2020-07-21	3.09888		1881.62	6	1.19979	2021-05-22				2.45096		292.718	2021-06-12	2467.06	585.435	2423.54	45.7721	39.1781	143	2021-06-12	2.45096	0.425467		2021-06-12	0.425467		2021-02-20	0.326639	1.87898	1.82542			2021-06-15	6491.58	287.12	1231.75	29.2143	40	146	2021-06-15	2.70479	0.230181		2021-06-15	0.230181
2021-01-15	7.53841	2.83958		2020-07-22	3.09927		2467.06	7	1.64019	2021-06-12				2.7231		180.362	2021-07-03	2827.78	360.724	2896.62	54.7069	44.9315	164	2021-07-03	2.7231	0.303856		2021-07-03	0.303856		2021-02-21	0.332029	2.21101	2.14799			2021-07-15	6786.77	295.182	1522.91	36.1197	48.2192	176	2021-07-15	2.82409	0.472855		2021-07-15	0.472855
2021-02-15	7.51401	2.84521		2020-07-23	3.09966		2827.78	8	1.73258	2021-07-03				2.59973		157.498	2021-07-24	3142.78	314.996	3234.48	61.0879	50.6849	185	2021-07-24	2.59973	0.309594		2021-07-24	0.309594		2021-02-22	0.337419	2.54843	2.47579			2021-07-30	7089.69	302.923	1821.96	43.2125	52.3288	191	2021-07-30	2.74329	0.455894		2021-07-30	0.455894
2021-03-15	6.98579	2.96691		2020-07-24	3.10005		3142.78	9	1.7052	2021-07-24				2.64722		186.741	2021-08-14	3516.26	373.483	3578.72	67.5894	56.4384	206	2021-08-14	2.64722	0.310786		2021-08-14	0.310786		2021-02-23	0.342809	2.89124	2.80883			2021-08-15	7401.86	312.173	2129.51	50.5068	56.7123	207	2021-08-15	2.7708	0.515101		2021-08-15	0.515101
2021-04-15	6.7861	3.01293		2020-07-25	3.10044		3516.26	10	1.72953	2021-08-14				2.73371		158.824	2021-09-04	3833.91	317.648	3924.29	74.1159	62.1918	227	2021-09-04	2.73371	0.216808		2021-09-04	0.299402		2021-02-24	0.348199	3.23944	3.1471			2021-08-30	7741.23	339.37	2455.28	58.2334	60.8219	222	2021-08-30	2.76341	0.493927		2021-08-30	0.493927
2021-05-15	6.79449	3.01099		2020-07-26	3.10083		3833.91	11	1.59452	2021-09-04				2.57963		174.083	2021-10-03	4182.07	348.167	4257.19	80.4034	70.137	256	2021-10-03	2.57963	0.28862		2021-10-03	0.316107		2021-02-25	0.35359	3.59303	3.49062			2021-09-15	8068.27	327.041	2788.48	66.1362	65.2055	238	2021-09-15	2.68736	0.485211		2021-09-15	0.485211
2021-06-15	6.53929	3.06979		2020-07-27	3.10122		4182.07	12	1.55454	2021-10-03				2.63503		177.398	2021-10-26	4536.87	354.797	4608.67	87.0416	76.4384	279	2021-10-26	2.63503	0.262046		2021-10-26	0.311959		2021-02-26	0.35898	3.95201	3.83936			2021-09-30	8354.96	286.694	3095.35	73.4144	69.3151	253	2021-09-30	2.71186	0.221807		2021-09-30	0.221807
2021-07-15	6.42319	3.09655		2020-07-28	3.10161		4536.87	13	1.48173	2021-10-26				2.58241		169.471	2021-11-20	4875.81	338.942	4955.54	93.5927	83.2877	304	2021-11-20	2.58241	0.105037		2021-11-20	0.0985732		2021-02-27	0.36437	4.31638	4.19335			2021-11-01	8666.8	311.833	3394.61	80.5122	78.0822	285	2021-11-01	2.51923	0.500346		2021-11-01	0.500346
2021-08-15	6.3708	3.10862		2020-07-29	3.102		4875.81	14	1.15455	2021-11-20	2020-11-20			2.49295		169.78	2022-01-20	5215.37	339.56	5294.8	100	100	365	2022-01-20	2.49295	0.0634787		2022-01-20	0.0441591		2021-02-28	0.36976	4.68614	4.55257			2021-11-15	8945.65	278.854	3689.96	87.517	81.9178	299	2021-11-15	2.63389	0.398412		2021-11-15	0.398412
2021-09-15	6.55421	3.06636		2020-07-30	3.10239		5215.37	15	0.923736	2022-01-20	2021-01-20			2.3673		99.1049	2022-04-10	5413.58	198.21	5563.68	105.078	121.918	445	2022-04-10	2.3673	0.202223		2022-04-10	0.106167		2021-03-01	0.37515	5.06129	4.91703			2021-12-01	9204.34	258.686	3958.73	93.8916	86.3014	315	2021-12-01	2.65123	0.122168		2021-12-01	0.122168
2021-10-15	6.76819	3.01705		2020-07-31	3.10278		5413.58	16	1.38041	2022-04-10	2021-04-10			2.64903		125.748	2022-05-01	5665.08	251.497	5788.53	109.325	127.671	466	2022-05-01	2.64903						2021-03-02	0.38054	5.44183	5.28672			2022-01-20	9460.75	256.407	4216.27	100	100	365	2022-01-20	2.41382	0.0431657		2022-01-20	0.0431657
2021-11-15	7.12921	2.93387		2020-08-01	3.10317		5665.08	17	1.4554	2022-05-01	2021-05-01			2.66754																	2021-03-03	0.385931	5.82776	5.66165			2022-06-15	9735.77	275.028	4481.99	106.302	140	511	2022-06-15	2.81306			2022-06-15	0
2021-12-15	7.39189	2.87334		2020-08-02	3.10356		5928.02	18	1.32183		2021-05-15			2.67292																	2021-03-04	0.391321	6.21908	6.04182
2022-01-15	7.53841	2.83958		2020-08-03	3.10394		6204.46	19	1.4469		2021-05-25			2.73424																	2021-03-05	0.396711	6.61579	6.42722
2022-02-15	7.51401	2.84521		2020-08-04	3.10433		6491.58	20	1.57768		2021-06-15			2.70479																	2021-03-06	0.402101	7.01789	6.81786
2022-03-15	6.98579	2.96691		2020-08-05	3.10472		6786.77	21	1.61336		2021-07-15			2.82409																	2021-03-07	0.407491	7.42538	7.21374
2022-04-15	6.7861	3.01293		2020-08-06	3.10511		7089.69	22	1.81999		2021-07-30			2.74329																	2021-03-08	0.412881	7.83826	7.61485
2022-05-15	6.79449	3.01099		2020-08-07	3.1055		7401.86	23	2.08898		2021-08-15			2.7708																	2021-03-09	0.418272	8.25653	8.0212
2022-06-15	6.53929	3.06979		2020-08-08	3.10589		7741.23	24	2.22649		2021-08-30			2.76341																	2021-03-10	0.423662	8.6802	8.43279
2022-07-15	6.42319	3.09655		2020-08-09	3.10628		8068.27	25	2.26213		2021-09-15			2.68736																	2021-03-11	0.422502	9.1027	8.84325
2022-08-15	6.3708	3.10862		2020-08-10	3.10667		8354.96	26	2.25439		2021-09-30			2.71186																	2021-03-12	0.421342	9.52404	9.25258
2022-09-15	6.55421	3.06636		2020-08-11	3.10706		8666.8	27	2.19964		2021-11-01			2.51923																	2021-03-13	0.420182	9.94422	9.66078
2022-10-15	6.76819	3.01705		2020-08-12	3.10745		8945.65	28	1.98317		2021-11-15			2.63389																	2021-03-14	0.419022	10.3632	10.0679
2022-11-15	7.12921	2.93387		2020-08-13	3.10784		9204.34	29	1.79768		2021-12-01	2020-12-01		2.65123																	2021-03-15	0.417862	10.7811	10.4738
2022-12-15	7.39189	2.87334		2020-08-14	3.10823		9460.75	30	1.1492		2022-01-20	2021-01-20		2.41382																	2021-03-16	0.416703	11.1978	10.8786
2023-01-15	7.53841	2.83958		2020-08-15	3.10862		9735.77	31	1.78915		2022-06-15	2021-06-15		2.81306																	2021-03-17	0.415543	11.6134	11.2823
				2020-08-16	3.10725		9961.33	32	1.94239		2022-06-30	2021-06-30		2.7764																	2021-03-18	0.414383	12.0277	11.6849
				2020-08-17	3.10589		10148.8	33	2.22904			2021-07-15		2.77194																	2021-03-19	0.413223	12.441	12.0864
				2020-08-18	3.10453		10358.9	34	2.24343			2021-07-30		2.76553																	2021-03-20	0.412063	12.853	12.4867
				2020-08-19	3.10316		10635.9	35	2.28504			2021-08-15		2.808																	2021-03-21	0.410903	13.2639	12.8859
				2020-08-20	3.1018		10846	36	2.23259			2021-08-27		2.69271																	2021-03-22	0.409743	13.6737	13.2839
				2020-08-21	3.10044		11092.8	37	2.20437			2021-09-05		2.77852																	2021-03-23	0.408584	14.0823	13.6809
				2020-08-22	3.09907		11341.8	38	2.20415			2021-09-20		2.76427																	2021-03-24	0.407424	14.4897	14.0767
				2020-08-23	3.09771		11647.1	39	2.07799			2021-10-15	2020-10-15	2.69718																	2021-03-25	0.406264	14.8959	14.4714
				2020-08-24	3.09635		11945.1	40	1.30413			2022-01-15	2021-01-15	2.56803																	2021-03-26	0.405104	15.301	14.8649
				2020-08-25	3.09499		12173	41	1.52482			2022-07-01	2021-07-01	2.78038																	2021-03-27	0.403944	15.705	15.2574
				2020-08-26	3.09362		12360.1	42	1.99434				2021-08-15	2.66534																	2021-03-28	0.402784	16.1078	15.6487
				2020-08-27	3.09226		12735.8	43	2.22181				2021-09-15	2.77723																	2021-03-29	0.401624	16.5094	16.0388
				2020-08-28	3.0909		13120.2	44	2.12396				2021-10-15	2.7613																	2021-03-30	0.400465	16.9099	16.4279
				2020-08-29	3.08953		13433.7	45	2.06832				2021-11-15	2.65976																	2021-03-31	0.399305	17.3092	16.8158
				2020-08-30	3.08817		13741.6	46	1.49216				2021-12-15	2.57432																	2021-04-01	0.398145	17.7073	17.2026
				2020-08-31	3.08681		14154	47	1.08834				2022-01-15	2.57151																	2021-04-02	0.396985	18.1043	17.5883
				2020-09-01	3.08544		14577.6	48	1.43338				2022-02-15	2.58182																	2021-04-03	0.395825	18.5001	17.9728
				2020-09-02	3.08408																										2021-04-04	0.394665	18.8948	18.3562
				2020-09-03	3.08272																										2021-04-05	0.393505	19.2883	18.7385
				2020-09-04	3.08135																										2021-04-06	0.392346	19.6806	19.1197
				2020-09-05	3.07999																										2021-04-07	0.391186	20.0718	19.4997
				2020-09-06	3.07863																										2021-04-08	0.390026	20.4618	19.8786
				2020-09-07	3.07726																										2021-04-09	0.388866	20.8507	20.2564
				2020-09-08	3.0759																										2021-04-10	0.387706	21.2384	20.6331
				2020-09-09	3.07454																										2021-04-11	0.389361	21.6278	21.0113
				2020-09-10	3.07317																										2021-04-12	0.391016	22.0188	21.3912
				2020-09-11	3.07181																										2021-04-13	0.392671	22.4115	21.7727
				2020-09-12	3.07045																										2021-04-14	0.394326	22.8058	22.1558
				2020-09-13	3.06908																										2021-04-15	0.395981	23.2018	22.5405
				2020-09-14	3.06772																										2021-04-16	0.397636	23.5994	22.9268
				2020-09-15	3.06636																										2021-04-17	0.399291	23.9987	23.3147
				2020-09-16	3.06471																										2021-04-18	0.400946	24.3997	23.7042
				2020-09-17	3.06307																										2021-04-19	0.402602	24.8023	24.0953
				2020-09-18	3.06143																										2021-04-20	0.404257	25.2065	24.4881
				2020-09-19	3.05978																										2021-04-21	0.405912	25.6124	24.8824
				2020-09-20	3.05814																										2021-04-22	0.407567	26.02	25.2783
				2020-09-21	3.0565																										2021-04-23	0.409222	26.4292	25.6759
				2020-09-22	3.05485																										2021-04-24	0.410877	26.8401	26.0751
				2020-09-23	3.05321																										2021-04-25	0.412532	27.2526	26.4758
				2020-09-24	3.05157																										2021-04-26	0.414187	27.6668	26.8782
				2020-09-25	3.04992																										2021-04-27	0.415842	28.0826	27.2822
				2020-09-26	3.04828																										2021-04-28	0.417497	28.5001	27.6878
				2020-09-27	3.04664																										2021-04-29	0.419152	28.9193	28.095
				2020-09-28	3.04499																										2021-04-30	0.420807	29.3401	28.5038
				2020-09-29	3.04335																										2021-05-01	0.422462	29.7626	28.9142
				2020-09-30	3.04171																										2021-05-02	0.426038	30.1886	29.3281
				2020-10-01	3.04006																										2021-05-03	0.429614	30.6182	29.7455
				2020-10-02	3.03842																										2021-05-04	0.43319	31.0514	30.1664
				2020-10-03	3.03677																										2021-05-05	0.436765	31.4882	30.5907
				2020-10-04	3.03513																										2021-05-06	0.440341	31.9285	31.0185
				2020-10-05	3.03349																										2021-05-07	0.443917	32.3724	31.4497
				2020-10-06	3.03184																										2021-05-08	0.447493	32.8199	31.8845
				2020-10-07	3.0302																										2021-05-09	0.451069	33.271	32.3227
				2020-10-08	3.02856																										2021-05-10	0.454644	33.7256	32.7644
				2020-10-09	3.02691																										2021-05-11	0.45822	34.1839	33.2095
				2020-10-10	3.02527										1502																2021-05-12	0.461796	34.6457	33.6582
				2020-10-11	3.02363																										2021-05-13	0.465372	35.111	34.1103
				2020-10-12	3.02198																										2021-05-14	0.468948	35.58	34.5658
				2020-10-13	3.02034																										2021-05-15	0.472524	36.0525	35.0249
				2020-10-14	3.0187																										2021-05-16	0.476099	36.5286	35.4874
				2020-10-15	3.01705																										2021-05-17	0.479675	37.0083	35.9534
				2020-10-16	3.01437																										2021-05-18	0.483251	37.4915	36.4229
				2020-10-17	3.01169																										2021-05-19	0.486827	37.9783	36.8959
				2020-10-18	3.009																										2021-05-20	0.490403	38.4687	37.3723
				2020-10-19	3.00632																										2021-05-21	0.493978	38.9627	37.8522
				2020-10-20	3.00364																										2021-05-22	0.497554	39.4603	38.3356
				2020-10-21	3.00095																										2021-05-23	0.494122	39.9544	38.8156
				2020-10-22	2.99827																										2021-05-24	0.490689	40.4451	39.2923
				2020-10-23	2.99559																										2021-05-25	0.487256	40.9323	39.7657
				2020-10-24	2.9929																										2021-05-26	0.483823	41.4162	40.2357
				2020-10-25	2.99022																										2021-05-27	0.480391	41.8966	40.7024
				2020-10-26	2.98754																										2021-05-28	0.476958	42.3735	41.1658
				2020-10-27	2.98485																										2021-05-29	0.473525	42.847	41.6258
				2020-10-28	2.98217																										2021-05-30	0.470092	43.3171	42.0825
				2020-10-29	2.97949																										2021-05-31	0.46666	43.7838	42.5358
				2020-10-30	2.9768																										2021-06-01	0.463227	44.247	42.9859
				2020-10-31	2.97412																										2021-06-02	0.459794	44.7068	43.4325
				2020-11-01	2.97144																										2021-06-03	0.456361	45.1632	43.8759
				2020-11-02	2.96875																										2021-06-04	0.452929	45.6161	44.3159
				2020-11-03	2.96607																										2021-06-05	0.449496	46.0656	44.7526
				2020-11-04	2.96339																										2021-06-06	0.446063	46.5117	45.186
				2020-11-05	2.9607																										2021-06-07	0.442631	46.9543	45.616
				2020-11-06	2.95802																										2021-06-08	0.439198	47.3935	46.0426
				2020-11-07	2.95534																										2021-06-09	0.435765	47.8293	46.466
				2020-11-08	2.95265																										2021-06-10	0.432332	48.2616	46.886
				2020-11-09	2.94997																										2021-06-11	0.4289	48.6905	47.3027
				2020-11-10	2.94729																										2021-06-12	0.425467	49.116	47.716
				2020-11-11	2.9446																										2021-06-13	0.419676	49.5356	48.1237
				2020-11-12	2.94192																										2021-06-14	0.413885	49.9495	48.5258
				2020-11-13	2.93924																										2021-06-15	0.408094	50.3576	48.9223
				2020-11-14	2.93655																										2021-06-16	0.402303	50.7599	49.3131
				2020-11-15	2.93387																										2021-06-17	0.396512	51.1564	49.6983
				2020-11-16	2.93185																										2021-06-18	0.390721	51.5472	50.0779
				2020-11-17	2.92983																										2021-06-19	0.38493	51.9321	50.4519
				2020-11-18	2.92782																										2021-06-20	0.379139	52.3112	50.8202
				2020-11-19	2.9258																										2021-06-21	0.373348	52.6846	51.1829
				2020-11-20	2.92378																										2021-06-22	0.367557	53.0521	51.54
				2020-11-21	2.92176																										2021-06-23	0.361766	53.4139	51.8914
				2020-11-22	2.91975																										2021-06-24	0.355975	53.7699	52.2373
				2020-11-23	2.91773																										2021-06-25	0.350184	54.1201	52.5775
				2020-11-24	2.91571																										2021-06-26	0.344393	54.4644	52.9121
				2020-11-25	2.91369																										2021-06-27	0.338602	54.803	53.241
				2020-11-26	2.91168																										2021-06-28	0.332811	55.1359	53.5643
				2020-11-27	2.90966																										2021-06-29	0.32702	55.4629	53.882
				2020-11-28	2.90764																										2021-06-30	0.321229	55.7841	54.1941
				2020-11-29	2.90562																										2021-07-01	0.315438	56.0995	54.5005
				2020-11-30	2.90361																										2021-07-02	0.309647	56.4092	54.8014
				2020-12-01	2.90159																										2021-07-03	0.303856	56.713	55.0966
				2020-12-02	2.89957										1503																2021-07-04	0.304129	57.0172	55.392
				2020-12-03	2.89755																										2021-07-05	0.304403	57.3216	55.6878
				2020-12-04	2.89554																										2021-07-06	0.304676	57.6263	55.9837
				2020-12-05	2.89352																										2021-07-07	0.304949	57.9312	56.28
				2020-12-06	2.8915																										2021-07-08	0.305222	58.2364	56.5765
				2020-12-07	2.88948																										2021-07-09	0.305495	58.5419	56.8733
				2020-12-08	2.88747																										2021-07-10	0.305769	58.8477	57.1704
				2020-12-09	2.88545																										2021-07-11	0.306042	59.1537	57.4677
				2020-12-10	2.88343																										2021-07-12	0.306315	59.46	57.7653
				2020-12-11	2.88141																										2021-07-13	0.306588	59.7666	58.0631
				2020-12-12	2.8794																										2021-07-14	0.306862	60.0735	58.3612
				2020-12-13	2.87738																										2021-07-15	0.307135	60.3806	58.6596
				2020-12-14	2.87536																										2021-07-16	0.307408	60.688	58.9583
				2020-12-15	2.87334																										2021-07-17	0.307681	60.9957	59.2572
				2020-12-16	2.87225																										2021-07-18	0.307954	61.3037	59.5563
				2020-12-17	2.87117																										2021-07-19	0.308228	61.6119	59.8558
				2020-12-18	2.87008																										2021-07-20	0.308501	61.9204	60.1555
				2020-12-19	2.86899																										2021-07-21	0.308774	62.2292	60.4555
				2020-12-20	2.8679																										2021-07-22	0.309047	62.5382	60.7557
				2020-12-21	2.86681																										2021-07-23	0.30932	62.8475	61.0562
				2020-12-22	2.86572																										2021-07-24	0.309594	63.1571	61.357
				2020-12-23	2.86463																										2021-07-25	0.30965	63.4668	61.6578
				2020-12-24	2.86354																										2021-07-26	0.309707	63.7765	61.9587
				2020-12-25	2.86245																										2021-07-27	0.309764	64.0863	62.2596
				2020-12-26	2.86136																										2021-07-28	0.309821	64.3961	62.5606
				2020-12-27	2.86027																										2021-07-29	0.309878	64.706	62.8617
				2020-12-28	2.85919																										2021-07-30	0.309934	65.0159	63.1628
				2020-12-29	2.8581																										2021-07-31	0.309991	65.3259	63.4639
				2020-12-30	2.85701																										2021-08-01	0.310048	65.6359	63.7651
				2020-12-31	2.85592																										2021-08-02	0.310105	65.946	64.0664
				2021-01-01	2.85483																										2021-08-03	0.310161	66.2562	64.3677
				2021-01-02	2.85374																										2021-08-04	0.310218	66.5664	64.6691
				2021-01-03	2.85265																										2021-08-05	0.310275	66.8767	64.9705
				2021-01-04	2.85156																										2021-08-06	0.310332	67.187	65.272
				2021-01-05	2.85047																										2021-08-07	0.310389	67.4974	65.5735
				2021-01-06	2.84938																										2021-08-08	0.310445	67.8079	65.8751
				2021-01-07	2.8483																										2021-08-09	0.310502	68.1184	66.1768
				2021-01-08	2.84721																										2021-08-10	0.310559	68.4289	66.4785
				2021-01-09	2.84612																										2021-08-11	0.310616	68.7395	66.7803
				2021-01-10	2.84503																										2021-08-12	0.310673	69.0502	67.0821
				2021-01-11	2.84394																										2021-08-13	0.310729	69.3609	67.384
				2021-01-12	2.84285																										2021-08-14	0.310786	69.6717	67.6859
				2021-01-13	2.84176																										2021-08-15	0.310244	69.982	67.9873
				2021-01-14	2.84067																										2021-08-16	0.309702	70.2917	68.2882
				2021-01-15	2.83958																										2021-08-17	0.30916	70.6008	68.5885
				2021-01-16	2.83976																										2021-08-18	0.308618	70.9094	68.8883
				2021-01-17	2.83995																										2021-08-19	0.308076	71.2175	69.1876
				2021-01-18	2.84013																										2021-08-20	0.307534	71.5251	69.4864
				2021-01-19	2.84031																										2021-08-21	0.306991	71.832	69.7846
				2021-01-20	2.84049																										2021-08-22	0.306449	72.1385	70.0823
				2021-01-21	2.84067																										2021-08-23	0.305907	72.4444	70.3795
				2021-01-22	2.84085																										2021-08-24	0.305365	72.7498	70.6762
				2021-01-23	2.84103																										2021-08-25	0.304823	73.0546	70.9723
				2021-01-24	2.84122																										2021-08-26	0.304281	73.3589	71.2679
				2021-01-25	2.8414																										2021-08-27	0.303739	73.6626	71.563
				2021-01-26	2.84158																										2021-08-28	0.303197	73.9658	71.8576
				2021-01-27	2.84176																										2021-08-29	0.302655	74.2685	72.1516
				2021-01-28	2.84194																										2021-08-30	0.302113	74.5706	72.4451
				2021-01-29	2.84212																										2021-08-31	0.301571	74.8721	72.7381
				2021-01-30	2.8423																										2021-09-01	0.301028	75.1732	73.0305
				2021-01-31	2.84248																										2021-09-02	0.300486	75.4737	73.3225
				2021-02-01	2.84267																										2021-09-03	0.299944	75.7736	73.6138
				2021-02-02	2.84285																										2021-09-04	0.299402	76.073	73.9047
				2021-02-03	2.84303																										2021-09-05	0.299978	76.373	74.1961
				2021-02-04	2.84321																										2021-09-06	0.300554	76.6735	74.4881
				2021-02-05	2.84339																										2021-09-07	0.30113	76.9747	74.7807
				2021-02-06	2.84357																										2021-09-08	0.301706	77.2764	75.0738
				2021-02-07	2.84375																										2021-09-09	0.302282	77.5787	75.3675
				2021-02-08	2.84394																										2021-09-10	0.302858	77.8815	75.6617
				2021-02-09	2.84412																										2021-09-11	0.303434	78.185	75.9565
				2021-02-10	2.8443																										2021-09-12	0.30401	78.489	76.2518
				2021-02-11	2.84448																										2021-09-13	0.304586	78.7936	76.5477
				2021-02-12	2.84466																										2021-09-14	0.305163	79.0987	76.8442
				2021-02-13	2.84484																										2021-09-15	0.305739	79.4045	77.1412
				2021-02-14	2.84502																										2021-09-16	0.306315	79.7108	77.4388
				2021-02-15	2.84521																										2021-09-17	0.306891	80.0177	77.7369
				2021-02-16	2.84955																										2021-09-18	0.307467	80.3251	78.0356
				2021-02-17	2.8539																										2021-09-19	0.308043	80.6332	78.3349
				2021-02-18	2.85825																										2021-09-20	0.308619	80.9418	78.6347
				2021-02-19	2.86259																										2021-09-21	0.309195	81.251	78.9351
				2021-02-20	2.86694																										2021-09-22	0.309771	81.5608	79.236
				2021-02-21	2.87129																										2021-09-23	0.310347	81.8711	79.5375
				2021-02-22	2.87563																										2021-09-24	0.310923	82.182	79.8396
				2021-02-23	2.87998																										2021-09-25	0.311499	82.4935	80.1422
				2021-02-24	2.88433																										2021-09-26	0.312075	82.8056	80.4454
				2021-02-25	2.88867																										2021-09-27	0.312651	83.1182	80.7491
				2021-02-26	2.89302																										2021-09-28	0.313227	83.4315	81.0534
				2021-02-27	2.89737																										2021-09-29	0.313803	83.7453	81.3583
				2021-02-28	2.90171																										2021-09-30	0.314379	84.0597	81.6637
				2021-03-01	2.90606																										2021-10-01	0.314955	84.3746	81.9697
				2021-03-02	2.91041																										2021-10-02	0.315531	84.6901	82.2762
				2021-03-03	2.91475																										2021-10-03	0.316107	85.0062	82.5833
				2021-03-04	2.9191																										2021-10-04	0.315927	85.3222	82.8903
				2021-03-05	2.92345																										2021-10-05	0.315746	85.6379	83.197
				2021-03-06	2.92779																										2021-10-06	0.315566	85.9535	83.5036
				2021-03-07	2.93214																										2021-10-07	0.315386	86.2689	83.81
				2021-03-08	2.93649																										2021-10-08	0.315205	86.5841	84.1162
				2021-03-09	2.94083																										2021-10-09	0.315025	86.8991	84.4222
				2021-03-10	2.94518																										2021-10-10	0.314845	87.2139	84.7281
				2021-03-11	2.94953																										2021-10-11	0.314664	87.5286	85.0338
				2021-03-12	2.95387																										2021-10-12	0.314484	87.8431	85.3393
				2021-03-13	2.95822																										2021-10-13	0.314304	88.1574	85.6447
				2021-03-14	2.96257																										2021-10-14	0.314123	88.4715	85.9498
				2021-03-15	2.96691																										2021-10-15	0.313943	88.7855	86.2548
				2021-03-16	2.9684																										2021-10-16	0.313763	89.0992	86.5596
				2021-03-17	2.96988																										2021-10-17	0.313582	89.4128	86.8643
				2021-03-18	2.97137																										2021-10-18	0.313402	89.7262	87.1688
				2021-03-19	2.97285																										2021-10-19	0.313221	90.0394	87.4731
				2021-03-20	2.97434																										2021-10-20	0.313041	90.3525	87.7772
				2021-03-21	2.97582																										2021-10-21	0.312861	90.6653	88.0811
				2021-03-22	2.9773																										2021-10-22	0.31268	90.978	88.3849
				2021-03-23	2.97879																										2021-10-23	0.3125	91.2905	88.6885
				2021-03-24	2.98027																										2021-10-24	0.31232	91.6028	88.9919
				2021-03-25	2.98176																										2021-10-25	0.312139	91.915	89.2951
				2021-03-26	2.98324																										2021-10-26	0.311959	92.2269	89.5982
				2021-03-27	2.98473																										2021-10-27	0.303424	92.5304	89.893
				2021-03-28	2.98621																										2021-10-28	0.294888	92.8252	90.1795
				2021-03-29	2.98769																										2021-10-29	0.286353	93.1116	90.4577
				2021-03-30	2.98918																										2021-10-30	0.277817	93.3894	90.7276
				2021-03-31	2.99066																										2021-10-31	0.269282	93.6587	90.9892
				2021-04-01	2.99215																										2021-11-01	0.260746	93.9194	91.2425
				2021-04-02	2.99363																										2021-11-02	0.252211	94.1717	91.4875
				2021-04-03	2.99512																										2021-11-03	0.243676	94.4153	91.7242
				2021-04-04	2.9966																										2021-11-04	0.23514	94.6505	91.9527
				2021-04-05	2.99808																										2021-11-05	0.226605	94.8771	92.1728
				2021-04-06	2.99957																										2021-11-06	0.218069	95.0951	92.3847
				2021-04-07	3.00105																										2021-11-07	0.209534	95.3047	92.5882
				2021-04-08	3.00254																										2021-11-08	0.200998	95.5057	92.7835
				2021-04-09	3.00402																										2021-11-09	0.192463	95.6981	92.9705
				2021-04-10	3.00551																										2021-11-10	0.183928	95.8821	93.1492
				2021-04-11	3.00699																										2021-11-11	0.175392	96.0575	93.3196
				2021-04-12	3.00847																										2021-11-12	0.166857	96.2243	93.4817
				2021-04-13	3.00996																										2021-11-13	0.158321	96.3826	93.6355
				2021-04-14	3.01144																										2021-11-14	0.149786	96.5324	93.781
				2021-04-15	3.01293																										2021-11-15	0.14125	96.6737	93.9182
				2021-04-16	3.01286																										2021-11-16	0.132715	96.8064	94.0471
				2021-04-17	3.0128																										2021-11-17	0.12418	96.9306	94.1678
				2021-04-18	3.01273																										2021-11-18	0.115644	97.0462	94.2801
				2021-04-19	3.01267																										2021-11-19	0.107109	97.1533	94.3842
				2021-04-20	3.0126																										2021-11-20	0.0985732	97.2519	94.4799
				2021-04-21	3.01254																										2021-11-21	0.0976812	97.3496	94.5748
				2021-04-22	3.01248																										2021-11-22	0.0967892	97.4464	94.6689
				2021-04-23	3.01241																										2021-11-23	0.0958971	97.5423	94.762
				2021-04-24	3.01235																										2021-11-24	0.0950051	97.6373	94.8543
				2021-04-25	3.01228																										2021-11-25	0.0941131	97.7314	94.9458
				2021-04-26	3.01222																										2021-11-26	0.093221	97.8246	95.0363
				2021-04-27	3.01215																										2021-11-27	0.092329	97.9169	95.126
				2021-04-28	3.01209																										2021-11-28	0.0914369	98.0084	95.2149
				2021-04-29	3.01202																										2021-11-29	0.0905449	98.0989	95.3028
				2021-04-30	3.01196																										2021-11-30	0.0896529	98.1886	95.3899
				2021-05-01	3.0119																										2021-12-01	0.0887608	98.2773	95.4761
				2021-05-02	3.01183																										2021-12-02	0.0878688	98.3652	95.5615
				2021-05-03	3.01177																										2021-12-03	0.0869768	98.4522	95.646
				2021-05-04	3.0117																										2021-12-04	0.0860847	98.5383	95.7296
				2021-05-05	3.01164																										2021-12-05	0.0851927	98.6234	95.8124
				2021-05-06	3.01157																										2021-12-06	0.0843007	98.7077	95.8943
				2021-05-07	3.01151																										2021-12-07	0.0834086	98.7912	95.9753
				2021-05-08	3.01144																										2021-12-08	0.0825166	98.8737	96.0555
				2021-05-09	3.01138																										2021-12-09	0.0816246	98.9553	96.1348
				2021-05-10	3.01132																										2021-12-10	0.0807325	99.036	96.2132
				2021-05-11	3.01125																										2021-12-11	0.0798405	99.1159	96.2908
				2021-05-12	3.01119																										2021-12-12	0.0789484	99.1948	96.3675
				2021-05-13	3.01112																										2021-12-13	0.0780564	99.2729	96.4433
				2021-05-14	3.01106																										2021-12-14	0.0771644	99.35	96.5183
				2021-05-15	3.01099																										2021-12-15	0.0762723	99.4263	96.5924
				2021-05-16	3.01289																										2021-12-16	0.0753803	99.5017	96.6656
				2021-05-17	3.01479																										2021-12-17	0.0744883	99.5762	96.738
				2021-05-18	3.01668																										2021-12-18	0.0735962	99.6498	96.8095
				2021-05-19	3.01858																										2021-12-19	0.0727042	99.7225	96.8801
				2021-05-20	3.02048																										2021-12-20	0.0718122	99.7943	96.9499
				2021-05-21	3.02237																										2021-12-21	0.0709201	99.8652	97.0188
				2021-05-22	3.02427																										2021-12-22	0.0700281	99.9352	97.0868
				2021-05-23	3.02617																										2021-12-23	0.0691361	100.004	97.154
				2021-05-24	3.02806																										2021-12-24	0.068244	100.073	97.2203
				2021-05-25	3.02996																										2021-12-25	0.067352	100.14	97.2857
				2021-05-26	3.03186																										2021-12-26	0.06646	100.206	97.3503
				2021-05-27	3.03376																										2021-12-27	0.0655679	100.272	97.414
				2021-05-28	3.03565																										2021-12-28	0.0646759	100.337	97.4768
				2021-05-29	3.03755																										2021-12-29	0.0637838	100.4	97.5388
				2021-05-30	3.03945																										2021-12-30	0.0628918	100.463	97.5999
				2021-05-31	3.04134																										2021-12-31	0.0619998	100.525	97.6601
				2021-06-01	3.04324																										2022-01-01	0.0611077	100.586	97.7195
				2021-06-02	3.04514																										2022-01-02	0.0602157	100.647	97.778
				2021-06-03	3.04703																										2022-01-03	0.0593237	100.706	97.8356
				2021-06-04	3.04893																										2022-01-04	0.0584316	100.764	97.8924
				2021-06-05	3.05083																										2022-01-05	0.0575396	100.822	97.9483
				2021-06-06	3.05272																										2022-01-06	0.0566476	100.879	98.0033
				2021-06-07	3.05462																										2022-01-07	0.0557555	100.934	98.0575
				2021-06-08	3.05652																										2022-01-08	0.0548635	100.989	98.1108
				2021-06-09	3.05841																										2022-01-09	0.0539715	101.043	98.1632
				2021-06-10	3.06031																										2022-01-10	0.0530794	101.096	98.2148
				2021-06-11	3.06221																										2022-01-11	0.0521874	101.148	98.2655
				2021-06-12	3.0641																										2022-01-12	0.0512953	101.2	98.3153
				2021-06-13	3.066																										2022-01-13	0.0504033	101.25	98.3643
				2021-06-14	3.0679																										2022-01-14	0.0495113	101.3	98.4124
				2021-06-15	3.06979																										2022-01-15	0.0486192	101.348	98.4596
				2021-06-16	3.07069																										2022-01-16	0.0477272	101.396	98.506
				2021-06-17	3.07158																										2022-01-17	0.0468352	101.443	98.5515
				2021-06-18	3.07247																										2022-01-18	0.0459431	101.489	98.5961
				2021-06-19	3.07336																										2022-01-19	0.0450511	101.534	98.6399
				2021-06-20	3.07425																										2022-01-20	0.0441591	101.578	98.6828
				2021-06-21	3.07515																										2022-01-21	0.0449342	101.623	98.7264
				2021-06-22	3.07604																										2022-01-22	0.0457093	101.669	98.7708
				2021-06-23	3.07693																										2022-01-23	0.0464844	101.715	98.816
				2021-06-24	3.07782																										2022-01-24	0.0472595	101.762	98.8619
				2021-06-25	3.07871																										2022-01-25	0.0480346	101.81	98.9086
				2021-06-26	3.0796																										2022-01-26	0.0488097	101.859	98.956
				2021-06-27	3.0805																										2022-01-27	0.0495848	101.909	99.0041
				2021-06-28	3.08139																										2022-01-28	0.0503599	101.959	99.0531
				2021-06-29	3.08228																										2022-01-29	0.051135	102.01	99.1028
				2021-06-30	3.08317																										2022-01-30	0.0519101	102.062	99.1532
				2021-07-01	3.08406																										2022-01-31	0.0526852	102.115	99.2044
				2021-07-02	3.08495																										2022-02-01	0.0534603	102.168	99.2563
				2021-07-03	3.08585																										2022-02-02	0.0542354	102.223	99.309
				2021-07-04	3.08674																										2022-02-03	0.0550105	102.278	99.3624
				2021-07-05	3.08763																										2022-02-04	0.0557856	102.333	99.4166
				2021-07-06	3.08852																										2022-02-05	0.0565607	102.39	99.4716
				2021-07-07	3.08941																										2022-02-06	0.0573358	102.447	99.5273
				2021-07-08	3.0903																										2022-02-07	0.0581109	102.505	99.5837
				2021-07-09	3.0912																										2022-02-08	0.058886	102.564	99.6409
				2021-07-10	3.09209																										2022-02-09	0.0596611	102.624	99.6989
				2021-07-11	3.09298																										2022-02-10	0.0604362	102.684	99.7576
				2021-07-12	3.09387																										2022-02-11	0.0612113	102.746	99.8171
				2021-07-13	3.09476																										2022-02-12	0.0619864	102.808	99.8773
				2021-07-14	3.09565																										2022-02-13	0.0627615	102.87	99.9383
				2021-07-15	3.09655																										2022-02-14	0.0635366	102.934	100
				2021-07-16	3.09694
				2021-07-17	3.09732
				2021-07-18	3.09771
				2021-07-19	3.0981
				2021-07-20	3.09849
				2021-07-21	3.09888
				2021-07-22	3.09927
				2021-07-23	3.09966
				2021-07-24	3.10005
				2021-07-25	3.10044
				2021-07-26	3.10083
				2021-07-27	3.10122
				2021-07-28	3.10161
				2021-07-29	3.102
				2021-07-30	3.10239
				2021-07-31	3.10278
				2021-08-01	3.10317
				2021-08-02	3.10356
				2021-08-03	3.10394
				2021-08-04	3.10433
				2021-08-05	3.10472
				2021-08-06	3.10511
				2021-08-07	3.1055
				2021-08-08	3.10589
				2021-08-09	3.10628
				2021-08-10	3.10667
				2021-08-11	3.10706
				2021-08-12	3.10745
				2021-08-13	3.10784
				2021-08-14	3.10823
				2021-08-15	3.10862
				2021-08-16	3.10725
				2021-08-17	3.10589
				2021-08-18	3.10453
				2021-08-19	3.10316
				2021-08-20	3.1018
				2021-08-21	3.10044
				2021-08-22	3.09907
				2021-08-23	3.09771
				2021-08-24	3.09635
				2021-08-25	3.09499
				2021-08-26	3.09362
				2021-08-27	3.09226
				2021-08-28	3.0909
				2021-08-29	3.08953
				2021-08-30	3.08817
				2021-08-31	3.08681
				2021-09-01	3.08544
				2021-09-02	3.08408
				2021-09-03	3.08272
				2021-09-04	3.08135
				2021-09-05	3.07999
				2021-09-06	3.07863
				2021-09-07	3.07726
				2021-09-08	3.0759
				2021-09-09	3.07454
				2021-09-10	3.07317
				2021-09-11	3.07181
				2021-09-12	3.07045
				2021-09-13	3.06908
				2021-09-14	3.06772
				2021-09-15	3.06636
				2021-09-16	3.06471
				2021-09-17	3.06307
				2021-09-18	3.06143
				2021-09-19	3.05978
				2021-09-20	3.05814
				2021-09-21	3.0565
				2021-09-22	3.05485
				2021-09-23	3.05321
				2021-09-24	3.05157
				2021-09-25	3.04992
				2021-09-26	3.04828
				2021-09-27	3.04664
				2021-09-28	3.04499
				2021-09-29	3.04335
				2021-09-30	3.04171
				2021-10-01	3.04006
				2021-10-02	3.03842
				2021-10-03	3.03677
				2021-10-04	3.03513
				2021-10-05	3.03349
				2021-10-06	3.03184
				2021-10-07	3.0302
				2021-10-08	3.02856
				2021-10-09	3.02691
				2021-10-10	3.02527
				2021-10-11	3.02363
				2021-10-12	3.02198
				2021-10-13	3.02034
				2021-10-14	3.0187
				2021-10-15	3.01705
				2021-10-16	3.01437
				2021-10-17	3.01169
				2021-10-18	3.009
				2021-10-19	3.00632
				2021-10-20	3.00364
				2021-10-21	3.00095
				2021-10-22	2.99827
				2021-10-23	2.99559
				2021-10-24	2.9929
				2021-10-25	2.99022
				2021-10-26	2.98754
				2021-10-27	2.98485
				2021-10-28	2.98217
				2021-10-29	2.97949
				2021-10-30	2.9768
				2021-10-31	2.97412
				2021-11-01	2.97144
				2021-11-02	2.96875
				2021-11-03	2.96607
				2021-11-04	2.96339
				2021-11-05	2.9607
				2021-11-06	2.95802
				2021-11-07	2.95534
				2021-11-08	2.95265
				2021-11-09	2.94997
				2021-11-10	2.94729
				2021-11-11	2.9446
				2021-11-12	2.94192
				2021-11-13	2.93924
				2021-11-14	2.93655
				2021-11-15	2.93387
				2021-11-16	2.93185
				2021-11-17	2.92983
				2021-11-18	2.92782
				2021-11-19	2.9258
				2021-11-20	2.92378
				2021-11-21	2.92176
				2021-11-22	2.91975
				2021-11-23	2.91773
				2021-11-24	2.91571
				2021-11-25	2.91369
				2021-11-26	2.91168
				2021-11-27	2.90966
				2021-11-28	2.90764
				2021-11-29	2.90562
				2021-11-30	2.90361
				2021-12-01	2.90159
				2021-12-02	2.89957
				2021-12-03	2.89755
				2021-12-04	2.89554
				2021-12-05	2.89352
				2021-12-06	2.8915
				2021-12-07	2.88948
				2021-12-08	2.88747
				2021-12-09	2.88545
				2021-12-10	2.88343
				2021-12-11	2.88141
				2021-12-12	2.8794
				2021-12-13	2.87738
				2021-12-14	2.87536
				2021-12-15	2.87334
				2021-12-16	2.87225
				2021-12-17	2.87117
				2021-12-18	2.87008
				2021-12-19	2.86899
				2021-12-20	2.8679
				2021-12-21	2.86681
				2021-12-22	2.86572
				2021-12-23	2.86463
				2021-12-24	2.86354
				2021-12-25	2.86245
				2021-12-26	2.86136
				2021-12-27	2.86027
				2021-12-28	2.85919
				2021-12-29	2.8581
				2021-12-30	2.85701
				2021-12-31	2.85592
				2022-01-01	2.85483
				2022-01-02	2.85374
				2022-01-03	2.85265
				2022-01-04	2.85156
				2022-01-05	2.85047
				2022-01-06	2.84938
				2022-01-07	2.8483
				2022-01-08	2.84721
				2022-01-09	2.84612
				2022-01-10	2.84503
				2022-01-11	2.84394
				2022-01-12	2.84285
				2022-01-13	2.84176
				2022-01-14	2.84067
				2022-01-15	2.83958
				2022-01-16	2.83976
				2022-01-17	2.83995
				2022-01-18	2.84013
				2022-01-19	2.84031
				2022-01-20	2.84049
				2022-01-21	2.84067
				2022-01-22	2.84085
				2022-01-23	2.84103
				2022-01-24	2.84122
				2022-01-25	2.8414
				2022-01-26	2.84158
				2022-01-27	2.84176
				2022-01-28	2.84194
				2022-01-29	2.84212
				2022-01-30	2.8423
				2022-01-31	2.84248
				2022-02-01	2.84267
				2022-02-02	2.84285
				2022-02-03	2.84303
				2022-02-04	2.84321
				2022-02-05	2.84339
				2022-02-06	2.84357
				2022-02-07	2.84375
				2022-02-08	2.84394
				2022-02-09	2.84412
				2022-02-10	2.8443
				2022-02-11	2.84448
				2022-02-12	2.84466
				2022-02-13	2.84484
				2022-02-14	2.84502
				2022-02-15	2.84521
				2022-02-16	2.84955
				2022-02-17	2.8539
				2022-02-18	2.85825
				2022-02-19	2.86259
				2022-02-20	2.86694
				2022-02-21	2.87129
				2022-02-22	2.87563
				2022-02-23	2.87998
				2022-02-24	2.88433
				2022-02-25	2.88867
				2022-02-26	2.89302
				2022-02-27	2.89737
				2022-02-28	2.90171
				2022-03-01	2.90606
				2022-03-02	2.91041
				2022-03-03	2.91475
				2022-03-04	2.9191
				2022-03-05	2.92345
				2022-03-06	2.92779
				2022-03-07	2.93214
				2022-03-08	2.93649
				2022-03-09	2.94083
				2022-03-10	2.94518
				2022-03-11	2.94953
				2022-03-12	2.95387
				2022-03-13	2.95822
				2022-03-14	2.96257
				2022-03-15	2.96691
				2022-03-16	2.9684
				2022-03-17	2.96988
				2022-03-18	2.97137
				2022-03-19	2.97285
				2022-03-20	2.97434
				2022-03-21	2.97582
				2022-03-22	2.9773
				2022-03-23	2.97879
				2022-03-24	2.98027
				2022-03-25	2.98176
				2022-03-26	2.98324
				2022-03-27	2.98473
				2022-03-28	2.98621
				2022-03-29	2.98769
				2022-03-30	2.98918
				2022-03-31	2.99066
				2022-04-01	2.99215
				2022-04-02	2.99363
				2022-04-03	2.99512
				2022-04-04	2.9966
				2022-04-05	2.99808
				2022-04-06	2.99957
				2022-04-07	3.00105
				2022-04-08	3.00254
				2022-04-09	3.00402
				2022-04-10	3.00551
				2022-04-11	3.00699
				2022-04-12	3.00847
				2022-04-13	3.00996
				2022-04-14	3.01144
				2022-04-15	3.01293
				2022-04-16	3.01286
				2022-04-17	3.0128
				2022-04-18	3.01273
				2022-04-19	3.01267
				2022-04-20	3.0126
				2022-04-21	3.01254
				2022-04-22	3.01248
				2022-04-23	3.01241
				2022-04-24	3.01235
				2022-04-25	3.01228
				2022-04-26	3.01222
				2022-04-27	3.01215
				2022-04-28	3.01209
				2022-04-29	3.01202
				2022-04-30	3.01196
				2022-05-01	3.0119
				2022-05-02	3.01183
				2022-05-03	3.01177
				2022-05-04	3.0117
				2022-05-05	3.01164
				2022-05-06	3.01157
				2022-05-07	3.01151
				2022-05-08	3.01144
				2022-05-09	3.01138
				2022-05-10	3.01132
				2022-05-11	3.01125
				2022-05-12	3.01119
				2022-05-13	3.01112
				2022-05-14	3.01106
				2022-05-15	3.01099
				2022-05-16	3.01289
				2022-05-17	3.01479
				2022-05-18	3.01668
				2022-05-19	3.01858
				2022-05-20	3.02048
				2022-05-21	3.02237
				2022-05-22	3.02427
				2022-05-23	3.02617
				2022-05-24	3.02806
				2022-05-25	3.02996
				2022-05-26	3.03186
				2022-05-27	3.03376
				2022-05-28	3.03565
				2022-05-29	3.03755
				2022-05-30	3.03945
				2022-05-31	3.04134
				2022-06-01	3.04324
				2022-06-02	3.04514
				2022-06-03	3.04703
				2022-06-04	3.04893
				2022-06-05	3.05083
				2022-06-06	3.05272
				2022-06-07	3.05462
				2022-06-08	3.05652
				2022-06-09	3.05841
				2022-06-10	3.06031
				2022-06-11	3.06221
				2022-06-12	3.0641
				2022-06-13	3.066
				2022-06-14	3.0679
				2022-06-15	3.06979
				2022-06-16	3.07069
				2022-06-17	3.07158
				2022-06-18	3.07247
				2022-06-19	3.07336
				2022-06-20	3.07425
				2022-06-21	3.07515
				2022-06-22	3.07604
				2022-06-23	3.07693
				2022-06-24	3.07782
				2022-06-25	3.07871
				2022-06-26	3.0796
				2022-06-27	3.0805
				2022-06-28	3.08139
				2022-06-29	3.08228
				2022-06-30	3.08317
				2022-07-01	3.08406
				2022-07-02	3.08495
				2022-07-03	3.08585
				2022-07-04	3.08674
				2022-07-05	3.08763
				2022-07-06	3.08852
				2022-07-07	3.08941
				2022-07-08	3.0903
				2022-07-09	3.0912
				2022-07-10	3.09209
				2022-07-11	3.09298
				2022-07-12	3.09387
				2022-07-13	3.09476
				2022-07-14	3.09565
				2022-07-15	3.09655

## Sheet: Norwegian Trench seasonal growt
	Growth curves (daily growth% of annual increment			AVERAGE			Cumulative seasonal growth curves			AVERAGE
Date						Date	MOL8216_08VN16-A1L	MOL8216_08VN16-A1L	MOL8216_08VN16-A1L
2021-02-15	0.299688	0.1222	0.182776	0.201555		2021-02-15	0.291146	0.112455	0.135985	0.179862
2021-02-16	0.305078	0.124639	0.186876	0.205531		2021-02-16	0.587529	0.227154	0.275021	0.363235
2021-02-17	0.310468	0.127079	0.190976	0.209508		2021-02-17	0.889148	0.344099	0.417107	0.550118
2021-02-18	0.315858	0.129519	0.195076	0.213485		2021-02-18	1.196	0.46329	0.562243	0.740512
2021-02-19	0.321249	0.131959	0.199176	0.217461		2021-02-19	1.5081	0.584726	0.710429	0.934417
2021-02-20	0.326639	0.134399	0.203276	0.221438		2021-02-20	1.82542	0.708407	0.861666	1.13183
2021-02-21	0.332029	0.136839	0.207376	0.225415		2021-02-21	2.14799	0.834333	1.01595	1.33276
2021-02-22	0.337419	0.139279	0.211476	0.229391		2021-02-22	2.47579	0.962504	1.17329	1.5372
2021-02-23	0.342809	0.141718	0.215576	0.233368		2021-02-23	2.80883	1.09292	1.33368	1.74514
2021-02-24	0.348199	0.144158	0.219676	0.237345		2021-02-24	3.1471	1.22558	1.49712	1.9566
2021-02-25	0.35359	0.146598	0.223776	0.241321		2021-02-25	3.49062	1.36049	1.66361	2.17157
2021-02-26	0.35898	0.149038	0.227876	0.245298		2021-02-26	3.83936	1.49764	1.83315	2.39005
2021-02-27	0.36437	0.151478	0.231976	0.249275		2021-02-27	4.19335	1.63704	2.00574	2.61204
2021-02-28	0.36976	0.153918	0.236076	0.253251		2021-02-28	4.55257	1.77868	2.18138	2.83754
2021-03-01	0.37515	0.156358	0.240176	0.257228		2021-03-01	4.91703	1.92257	2.36007	3.06656
2021-03-02	0.38054	0.158797	0.244276	0.261205		2021-03-02	5.28672	2.06871	2.54181	3.29908
2021-03-03	0.385931	0.161237	0.248376	0.265181		2021-03-03	5.66165	2.21709	2.7266	3.53511
2021-03-04	0.391321	0.163677	0.252476	0.269158		2021-03-04	6.04182	2.36771	2.91444	3.77466
2021-03-05	0.396711	0.166117	0.256576	0.273134		2021-03-05	6.42722	2.52058	3.10533	4.01771
2021-03-06	0.402101	0.168557	0.260675	0.277111		2021-03-06	6.81786	2.67569	3.29927	4.26428
2021-03-07	0.407491	0.170997	0.264775	0.281088		2021-03-07	7.21374	2.83306	3.49627	4.51435
2021-03-08	0.412881	0.173437	0.268875	0.285064		2021-03-08	7.61485	2.99266	3.69631	4.76794
2021-03-09	0.418272	0.175876	0.272975	0.289041		2021-03-09	8.0212	3.15451	3.8994	5.02504
2021-03-10	0.423662	0.178316	0.277075	0.293018		2021-03-10	8.43279	3.31861	4.10555	5.28565
2021-03-11	0.422502	0.180756	0.281175	0.294811		2021-03-11	8.84325	3.48495	4.31474	5.54765
2021-03-12	0.421342	0.183196	0.285275	0.296604		2021-03-12	9.25258	3.65354	4.52698	5.81103
2021-03-13	0.420182	0.185636	0.289375	0.298398		2021-03-13	9.66078	3.82437	4.74228	6.07581
2021-03-14	0.419022	0.188076	0.293475	0.300191		2021-03-14	10.0679	3.99744	4.96062	6.34198
2021-03-15	0.417862	0.190516	0.297575	0.301984		2021-03-15	10.4738	4.17277	5.18202	6.60953
2021-03-16	0.416703	0.192955	0.301675	0.303778		2021-03-16	10.8786	4.35034	5.40647	6.87848
2021-03-17	0.415543	0.195395	0.305775	0.305571		2021-03-17	11.2823	4.53015	5.63396	7.14882
2021-03-18	0.414383	0.197835	0.309875	0.307364		2021-03-18	11.6849	4.71221	5.86451	7.42054
2021-03-19	0.413223	0.200275	0.313975	0.309158		2021-03-19	12.0864	4.89651	6.09811	7.69366
2021-03-20	0.412063	0.202715	0.318075	0.310951		2021-03-20	12.4867	5.08306	6.33475	7.96816
2021-03-21	0.410903	0.205155	0.322175	0.312744		2021-03-21	12.8859	5.27185	6.57445	8.24406
2021-03-22	0.409743	0.207595	0.326275	0.314538		2021-03-22	13.2839	5.46289	6.8172	8.52134
2021-03-23	0.408584	0.210034	0.330375	0.316331		2021-03-23	13.6809	5.65618	7.063	8.80001
2021-03-24	0.407424	0.212474	0.334475	0.318124		2021-03-24	14.0767	5.85171	7.31185	9.08008
2021-03-25	0.406264	0.214914	0.338575	0.319918		2021-03-25	14.4714	6.04948	7.56375	9.36153
2021-03-26	0.405104	0.217354	0.342675	0.321711		2021-03-26	14.8649	6.2495	7.8187	9.64437
2021-03-27	0.403944	0.219794	0.346775	0.323504		2021-03-27	15.2574	6.45177	8.0767	9.92861
2021-03-28	0.402784	0.222234	0.350875	0.325298		2021-03-28	15.6487	6.65628	8.33775	10.2142
2021-03-29	0.401624	0.224674	0.354975	0.327091		2021-03-29	16.0388	6.86304	8.60185	10.5012
2021-03-30	0.400465	0.227113	0.359075	0.328884		2021-03-30	16.4279	7.07204	8.869	10.7896
2021-03-31	0.399305	0.229553	0.363175	0.330678		2021-03-31	16.8158	7.28329	9.1392	11.0794
2021-04-01	0.398145	0.231993	0.367275	0.332471		2021-04-01	17.2026	7.49678	9.41245	11.3706
2021-04-02	0.396985	0.234433	0.371375	0.334264		2021-04-02	17.5883	7.71252	9.68875	11.6632
2021-04-03	0.395825	0.236873	0.375475	0.336058		2021-04-03	17.9728	7.9305	9.96811	11.9571
2021-04-04	0.394665	0.239313	0.379575	0.337851		2021-04-04	18.3562	8.15073	10.2505	12.2525
2021-04-05	0.393505	0.241753	0.383675	0.339644		2021-04-05	18.7385	8.3732	10.536	12.5492
2021-04-06	0.392346	0.244192	0.387775	0.341438		2021-04-06	19.1197	8.59792	10.8245	12.8474
2021-04-07	0.391186	0.246632	0.391875	0.343231		2021-04-07	19.4997	8.82488	11.116	13.1469
2021-04-08	0.390026	0.249072	0.395974	0.345024		2021-04-08	19.8786	9.05409	11.4106	13.4478
2021-04-09	0.388866	0.251512	0.400074	0.346817		2021-04-09	20.2564	9.28555	11.7083	13.7501
2021-04-10	0.387706	0.253952	0.404174	0.348611		2021-04-10	20.6331	9.51925	12.009	14.0538
2021-04-11	0.389361	0.262609	0.408274	0.353415		2021-04-11	21.0113	9.76091	12.3127	14.3617
2021-04-12	0.391016	0.271266	0.412374	0.358219		2021-04-12	21.3912	10.0105	12.6195	14.6738
2021-04-13	0.392671	0.279924	0.416474	0.363023		2021-04-13	21.7727	10.2681	12.9294	14.9901
2021-04-14	0.394326	0.288581	0.420574	0.367827		2021-04-14	22.1558	10.5337	13.2423	15.3106
2021-04-15	0.395981	0.297238	0.424674	0.372631		2021-04-15	22.5405	10.8073	13.5583	15.6353
2021-04-16	0.397636	0.305896	0.428774	0.377435		2021-04-16	22.9268	11.0888	13.8773	15.9643
2021-04-17	0.399291	0.314553	0.432874	0.38224		2021-04-17	23.3147	11.3782	14.1993	16.2974
2021-04-18	0.400946	0.32321	0.436974	0.387044		2021-04-18	23.7042	11.6757	14.5244	16.6348
2021-04-19	0.402602	0.331868	0.441074	0.391848		2021-04-19	24.0953	11.9811	14.8526	16.9763
2021-04-20	0.404257	0.340525	0.445174	0.396652		2021-04-20	24.4881	12.2944	15.1838	17.3221
2021-04-21	0.405912	0.349182	0.449274	0.401456		2021-04-21	24.8824	12.6158	15.5181	17.6721
2021-04-22	0.407567	0.357839	0.453374	0.40626		2021-04-22	25.2783	12.9451	15.8554	18.0263
2021-04-23	0.409222	0.366497	0.457474	0.411064		2021-04-23	25.6759	13.2823	16.1957	18.3847
2021-04-24	0.410877	0.375154	0.461574	0.415868		2021-04-24	26.0751	13.6276	16.5391	18.7473
2021-04-25	0.412532	0.383811	0.465674	0.420672		2021-04-25	26.4758	13.9808	16.8856	19.1141
2021-04-26	0.414187	0.392469	0.469774	0.425476		2021-04-26	26.8782	14.3419	17.2351	19.4851
2021-04-27	0.415842	0.401126	0.473874	0.430281		2021-04-27	27.2822	14.7111	17.5877	19.8603
2021-04-28	0.417497	0.409783	0.477974	0.435085		2021-04-28	27.6878	15.0882	17.9433	20.2398
2021-04-29	0.419152	0.41844	0.482074	0.439889		2021-04-29	28.095	15.4733	18.302	20.6234
2021-04-30	0.420807	0.427098	0.486174	0.444693		2021-04-30	28.5038	15.8663	18.6637	21.0113
2021-05-01	0.422462	0.435755	0.490274	0.449497		2021-05-01	28.9142	16.2673	19.0284	21.4033
2021-05-02	0.426038	0.450319	0.494374	0.45691		2021-05-02	29.3281	16.6817	19.3962	21.802
2021-05-03	0.429614	0.464882	0.498474	0.464323		2021-05-03	29.7455	17.1095	19.7671	22.2074
2021-05-04	0.43319	0.479446	0.502574	0.471736		2021-05-04	30.1664	17.5507	20.141	22.6194
2021-05-05	0.436765	0.494009	0.506674	0.479149		2021-05-05	30.5907	18.0053	20.518	23.038
2021-05-06	0.440341	0.508573	0.510774	0.486562		2021-05-06	31.0185	18.4734	20.898	23.4633
2021-05-07	0.443917	0.523136	0.514874	0.493976		2021-05-07	31.4497	18.9548	21.2811	23.8952
2021-05-08	0.447493	0.5377	0.518974	0.501389		2021-05-08	31.8845	19.4496	21.6672	24.3337
2021-05-09	0.451069	0.552263	0.523074	0.508802		2021-05-09	32.3227	19.9578	22.0563	24.7789
2021-05-10	0.454644	0.566826	0.527174	0.516215		2021-05-10	32.7644	20.4794	22.4486	25.2308
2021-05-11	0.45822	0.58139	0.531274	0.523628		2021-05-11	33.2095	21.0145	22.8438	25.6893
2021-05-12	0.461796	0.595953	0.535373	0.531041		2021-05-12	33.6582	21.5629	23.2421	26.1544
2021-05-13	0.465372	0.610517	0.539473	0.538454		2021-05-13	34.1103	22.1247	23.6435	26.6262
2021-05-14	0.468948	0.62508	0.543573	0.545867		2021-05-14	34.5658	22.7	24.0479	27.1046
2021-05-15	0.472524	0.639644	0.547673	0.55328		2021-05-15	35.0249	23.2886	24.4554	27.5896
2021-05-16	0.476099	0.607504	0.551773	0.545126		2021-05-16	35.4874	23.8476	24.8659	28.067
2021-05-17	0.479675	0.575365	0.555873	0.536971		2021-05-17	35.9534	24.3771	25.2795	28.5367
2021-05-18	0.483251	0.543225	0.559973	0.528817		2021-05-18	36.4229	24.877	25.6961	28.9987
2021-05-19	0.486827	0.511086	0.564073	0.520662		2021-05-19	36.8959	25.3474	26.1158	29.453
2021-05-20	0.490403	0.478946	0.568173	0.512507		2021-05-20	37.3723	25.7881	26.5385	29.8996
2021-05-21	0.493978	0.446807	0.572273	0.504353		2021-05-21	37.8522	26.1993	26.9643	30.3386
2021-05-22	0.497554	0.414667	0.576373	0.496198		2021-05-22	38.3356	26.5809	27.3931	30.7698
2021-05-23	0.494122	0.382528	0.580473	0.485708		2021-05-23	38.8156	26.9329	27.825	31.1912
2021-05-24	0.490689	0.350388	0.584573	0.475217		2021-05-24	39.2923	27.2554	28.2599	31.6025
2021-05-25	0.487256	0.318249	0.588673	0.464726		2021-05-25	39.7657	27.5482	28.6979	32.0039
2021-05-26	0.483823	0.314055	0.592773	0.463551		2021-05-26	40.2357	27.8372	29.1389	32.4039
2021-05-27	0.480391	0.309861	0.596873	0.462375		2021-05-27	40.7024	28.1224	29.583	32.8026
2021-05-28	0.476958	0.305668	0.600973	0.4612		2021-05-28	41.1658	28.4037	30.0301	33.1998
2021-05-29	0.473525	0.301474	0.605073	0.460024		2021-05-29	41.6258	28.6811	30.4802	33.5957
2021-05-30	0.470092	0.29728	0.609173	0.458849		2021-05-30	42.0825	28.9547	30.9335	33.9902
2021-05-31	0.46666	0.293086	0.613273	0.457673		2021-05-31	42.5358	29.2244	31.3897	34.3833
2021-06-01	0.463227	0.288893	0.617373	0.456498		2021-06-01	42.9859	29.4902	31.8491	34.7751
2021-06-02	0.459794	0.284699	0.621473	0.455322		2021-06-02	43.4325	29.7522	32.3114	35.1654
2021-06-03	0.456361	0.280505	0.625573	0.454147		2021-06-03	43.8759	30.0104	32.7769	35.5544
2021-06-04	0.452929	0.276312	0.629673	0.452971		2021-06-04	44.3159	30.2647	33.2453	35.942
2021-06-05	0.449496	0.272118	0.633773	0.451796		2021-06-05	44.7526	30.5151	33.7169	36.3282
2021-06-06	0.446063	0.267924	0.637873	0.45062		2021-06-06	45.186	30.7616	34.1914	36.713
2021-06-07	0.442631	0.26373	0.641973	0.449445		2021-06-07	45.616	31.0043	34.6691	37.0965
2021-06-08	0.439198	0.259537	0.646073	0.448269		2021-06-08	46.0426	31.2432	35.1498	37.4785
2021-06-09	0.435765	0.255343	0.650173	0.447094		2021-06-09	46.466	31.4781	35.6335	37.8592
2021-06-10	0.432332	0.251149	0.654273	0.445918		2021-06-10	46.886	31.7093	36.1203	38.2385
2021-06-11	0.4289	0.246955	0.658373	0.444743		2021-06-11	47.3027	31.9365	36.6101	38.6164
2021-06-12	0.425467	0.242762	0.662473	0.443567		2021-06-12	47.716	32.1599	37.103	38.993
2021-06-13	0.419676	0.238568	0.666573	0.441605		2021-06-13	48.1237	32.3795	37.5989	39.3674
2021-06-14	0.413885	0.234374	0.670672	0.439644		2021-06-14	48.5258	32.5952	38.0979	39.7396
2021-06-15	0.408094	0.230181	0.674772	0.437682		2021-06-15	48.9223	32.807	38.5999	40.1097
2021-06-16	0.402303	0.23827	0.666903	0.435825		2021-06-16	49.3131	33.0263	39.0961	40.4785
2021-06-17	0.396512	0.246359	0.659034	0.433968		2021-06-17	49.6983	33.253	39.5864	40.8459
2021-06-18	0.390721	0.254448	0.651165	0.432111		2021-06-18	50.0779	33.4871	40.0709	41.212
2021-06-19	0.38493	0.262537	0.643296	0.430254		2021-06-19	50.4519	33.7287	40.5495	41.5767
2021-06-20	0.379139	0.270626	0.635427	0.428397		2021-06-20	50.8202	33.9778	41.0222	41.9401
2021-06-21	0.373348	0.278715	0.627558	0.42654		2021-06-21	51.1829	34.2343	41.4891	42.3021
2021-06-22	0.367557	0.286805	0.619688	0.424683		2021-06-22	51.54	34.4982	41.9502	42.6628
2021-06-23	0.361766	0.294894	0.611819	0.422826		2021-06-23	51.8914	34.7696	42.4054	43.0221
2021-06-24	0.355975	0.302983	0.60395	0.420969		2021-06-24	52.2373	35.0484	42.8547	43.3801
2021-06-25	0.350184	0.311072	0.596081	0.419112		2021-06-25	52.5775	35.3346	43.2982	43.7368
2021-06-26	0.344393	0.319161	0.588212	0.417255		2021-06-26	52.9121	35.6284	43.7358	44.0921
2021-06-27	0.338602	0.32725	0.580343	0.415398		2021-06-27	53.241	35.9295	44.1676	44.446
2021-06-28	0.332811	0.335339	0.572473	0.413541		2021-06-28	53.5643	36.2381	44.5935	44.7987
2021-06-29	0.32702	0.343429	0.564604	0.411684		2021-06-29	53.882	36.5541	45.0136	45.1499
2021-06-30	0.321229	0.351518	0.556735	0.409827		2021-06-30	54.1941	36.8776	45.4278	45.4998
2021-07-01	0.315438	0.359607	0.555345	0.41013		2021-07-01	54.5005	37.2086	45.841	45.85
2021-07-02	0.309647	0.367696	0.553956	0.410433		2021-07-02	54.8014	37.5469	46.2531	46.2005
2021-07-03	0.303856	0.375785	0.552566	0.410736		2021-07-03	55.0966	37.8928	46.6642	46.5512
2021-07-04	0.304129	0.383874	0.551176	0.41306		2021-07-04	55.392	38.246	47.0743	46.9041
2021-07-05	0.304403	0.391963	0.549786	0.415384		2021-07-05	55.6878	38.6067	47.4833	47.2593
2021-07-06	0.304676	0.400053	0.548397	0.417708		2021-07-06	55.9837	38.9749	47.8913	47.6167
2021-07-07	0.304949	0.408142	0.547007	0.420033		2021-07-07	56.28	39.3505	48.2983	47.9763
2021-07-08	0.305222	0.416231	0.545617	0.422357		2021-07-08	56.5765	39.7335	48.7043	48.3381
2021-07-09	0.305495	0.42432	0.544227	0.424681		2021-07-09	56.8733	40.124	49.1092	48.7022
2021-07-10	0.305769	0.432409	0.542838	0.427005		2021-07-10	57.1704	40.5219	49.513	49.0684
2021-07-11	0.306042	0.440498	0.541448	0.429329		2021-07-11	57.4677	40.9273	49.9159	49.4369
2021-07-12	0.306315	0.448587	0.540058	0.431654		2021-07-12	57.7653	41.3401	50.3177	49.8077
2021-07-13	0.306588	0.456677	0.538669	0.433978		2021-07-13	58.0631	41.7603	50.7184	50.1806
2021-07-14	0.306862	0.464766	0.537279	0.436302		2021-07-14	58.3612	42.1881	51.1182	50.5558
2021-07-15	0.307135	0.472855	0.535889	0.438626		2021-07-15	58.6596	42.6232	51.5169	50.9332
2021-07-16	0.307408	0.471724	0.5412	0.440111		2021-07-16	58.9583	43.0573	51.9195	51.3117
2021-07-17	0.307681	0.470593	0.54651	0.441595		2021-07-17	59.2572	43.4904	52.3261	51.6912
2021-07-18	0.307954	0.469463	0.551821	0.443079		2021-07-18	59.5563	43.9224	52.7367	52.0718
2021-07-19	0.308228	0.468332	0.557132	0.444564		2021-07-19	59.8558	44.3534	53.1512	52.4535
2021-07-20	0.308501	0.467201	0.562442	0.446048		2021-07-20	60.1555	44.7833	53.5696	52.8362
2021-07-21	0.308774	0.466071	0.567753	0.447533		2021-07-21	60.4555	45.2122	53.9921	53.2199
2021-07-22	0.309047	0.46494	0.573064	0.449017		2021-07-22	60.7557	45.6401	54.4184	53.6047
2021-07-23	0.30932	0.463809	0.578374	0.450501		2021-07-23	61.0562	46.0669	54.8487	53.9906
2021-07-24	0.309594	0.462678	0.583685	0.451986		2021-07-24	61.357	46.4927	55.283	54.3776
2021-07-25	0.30965	0.461548	0.588996	0.453398		2021-07-25	61.6578	46.9174	55.7212	54.7655
2021-07-26	0.309707	0.460417	0.594306	0.45481		2021-07-26	61.9587	47.3411	56.1634	55.1544
2021-07-27	0.309764	0.459286	0.599617	0.456222		2021-07-27	62.2596	47.7638	56.6095	55.5443
2021-07-28	0.309821	0.458156	0.604928	0.457635		2021-07-28	62.5606	48.1854	57.0595	55.9352
2021-07-29	0.309878	0.457025	0.610238	0.459047		2021-07-29	62.8617	48.606	57.5136	56.3271
2021-07-30	0.309934	0.455894	0.615549	0.460459		2021-07-30	63.1628	49.0255	57.9715	56.7199
2021-07-31	0.309991	0.459595	0.628373	0.465986		2021-07-31	63.4639	49.4485	58.439	57.1171
2021-08-01	0.310048	0.463295	0.641197	0.471513		2021-08-01	63.7651	49.8748	58.9161	57.5187
2021-08-02	0.310105	0.466995	0.654021	0.47704		2021-08-02	64.0664	50.3046	59.4027	57.9245
2021-08-03	0.310161	0.470696	0.666845	0.482567		2021-08-03	64.3677	50.7377	59.8988	58.3347
2021-08-04	0.310218	0.474396	0.679669	0.488094		2021-08-04	64.6691	51.1743	60.4045	58.7493
2021-08-05	0.310275	0.478097	0.692493	0.493621		2021-08-05	64.9705	51.6143	60.9197	59.1682
2021-08-06	0.310332	0.481797	0.705317	0.499149		2021-08-06	65.272	52.0576	61.4444	59.5914
2021-08-07	0.310389	0.485498	0.71814	0.504676		2021-08-07	65.5735	52.5044	61.9787	60.0189
2021-08-08	0.310445	0.489198	0.730964	0.510203		2021-08-08	65.8751	52.9546	62.5226	60.4508
2021-08-09	0.310502	0.492899	0.743788	0.51573		2021-08-09	66.1768	53.4082	63.0759	60.887
2021-08-10	0.310559	0.496599	0.756612	0.521257		2021-08-10	66.4785	53.8652	63.6389	61.3275
2021-08-11	0.310616	0.500299	0.769436	0.526784		2021-08-11	66.7803	54.3256	64.2113	61.7724
2021-08-12	0.310673	0.504	0.78226	0.532311		2021-08-12	67.0821	54.7894	64.7933	62.2216
2021-08-13	0.310729	0.5077	0.795084	0.537838		2021-08-13	67.384	55.2566	65.3849	62.6751
2021-08-14	0.310786	0.511401	0.807908	0.543365		2021-08-14	67.6859	55.7272	65.986	63.133
2021-08-15	0.310244	0.515101	0.820732	0.548692		2021-08-15	67.9873	56.2013	66.5966	63.595
2021-08-16	0.309702	0.51369	0.837882	0.553758		2021-08-16	68.2882	56.674	67.22	64.0607
2021-08-17	0.30916	0.512278	0.855033	0.558823		2021-08-17	68.5885	57.1454	67.8561	64.53
2021-08-18	0.308618	0.510866	0.872183	0.563889		2021-08-18	68.8883	57.6155	68.505	65.003
2021-08-19	0.308076	0.509455	0.889333	0.568955		2021-08-19	69.1876	58.0844	69.1667	65.4795
2021-08-20	0.307534	0.508043	0.906484	0.57402		2021-08-20	69.4864	58.5519	69.8411	65.9598
2021-08-21	0.306991	0.506632	0.923634	0.579086		2021-08-21	69.7846	59.0181	70.5283	66.4437
2021-08-22	0.306449	0.50522	0.940784	0.584151		2021-08-22	70.0823	59.483	71.2282	66.9312
2021-08-23	0.305907	0.503808	0.957935	0.589217		2021-08-23	70.3795	59.9467	71.9409	67.4224
2021-08-24	0.305365	0.502397	0.975085	0.594282		2021-08-24	70.6762	60.409	72.6664	67.9172
2021-08-25	0.304823	0.500985	0.992235	0.599348		2021-08-25	70.9723	60.87	73.4046	68.4157
2021-08-26	0.304281	0.499574	1.00939	0.604413		2021-08-26	71.2679	61.3298	74.1556	68.9178
2021-08-27	0.303739	0.498162	1.02654	0.609479		2021-08-27	71.563	61.7882	74.9193	69.4235
2021-08-28	0.303197	0.49675	0.986739	0.595562		2021-08-28	71.8576	62.2453	75.6535	69.9188
2021-08-29	0.302655	0.495339	0.946943	0.581645		2021-08-29	72.1516	62.7012	76.358	70.4036
2021-08-30	0.302113	0.493927	0.907146	0.567729		2021-08-30	72.4451	63.1557	77.0329	70.8779
2021-08-31	0.301571	0.493382	0.867349	0.554101		2021-08-31	72.7381	63.6098	77.6782	71.342
2021-09-01	0.301028	0.492838	0.827553	0.540473		2021-09-01	73.0305	64.0633	78.2939	71.7959
2021-09-02	0.300486	0.492293	0.787756	0.526845		2021-09-02	73.3225	64.5163	78.88	72.2396
2021-09-03	0.299944	0.491748	0.74796	0.513217		2021-09-03	73.6138	64.9689	79.4365	72.6731
2021-09-04	0.299402	0.491203	0.708163	0.499589		2021-09-04	73.9047	65.4209	79.9633	73.0963
2021-09-05	0.299978	0.490658	0.668366	0.486334		2021-09-05	74.1961	65.8724	80.4606	73.5097
2021-09-06	0.300554	0.490114	0.653697	0.481455		2021-09-06	74.4881	66.3234	80.947	73.9195
2021-09-07	0.30113	0.489569	0.639028	0.476576		2021-09-07	74.7807	66.774	81.4224	74.3257
2021-09-08	0.301706	0.489024	0.624359	0.471696		2021-09-08	75.0738	67.224	81.8869	74.7282
2021-09-09	0.302282	0.488479	0.60969	0.466817		2021-09-09	75.3675	67.6735	82.3405	75.1272
2021-09-10	0.302858	0.487935	0.595021	0.461938		2021-09-10	75.6617	68.1225	82.7832	75.5225
2021-09-11	0.303434	0.48739	0.580351	0.457059		2021-09-11	75.9565	68.5711	83.215	75.9142
2021-09-12	0.30401	0.486845	0.565682	0.452179		2021-09-12	76.2518	69.0191	83.6359	76.3023
2021-09-13	0.304586	0.4863	0.551013	0.4473		2021-09-13	76.5477	69.4666	84.0458	76.6867
2021-09-14	0.305163	0.485756	0.536344	0.442421		2021-09-14	76.8442	69.9136	84.4449	77.0676
2021-09-15	0.305739	0.485211	0.521675	0.437541		2021-09-15	77.1412	70.3601	84.833	77.4448
2021-09-16	0.306315	0.46765	0.507006	0.42699		2021-09-16	77.4388	70.7905	85.2102	77.8132
2021-09-17	0.306891	0.45009	0.492337	0.416439		2021-09-17	77.7369	71.2047	85.5765	78.1727
2021-09-18	0.307467	0.43253	0.477668	0.405888		2021-09-18	78.0356	71.6027	85.9319	78.5234
2021-09-19	0.308043	0.41497	0.462998	0.395337		2021-09-19	78.3349	71.9846	86.2763	78.8653
2021-09-20	0.308619	0.397409	0.448329	0.384786		2021-09-20	78.6347	72.3503	86.6099	79.1983
2021-09-21	0.309195	0.379849	0.435699	0.374914		2021-09-21	78.9351	72.6999	86.9341	79.523
2021-09-22	0.309771	0.362289	0.423069	0.365043		2021-09-22	79.236	73.0333	87.2488	79.8394
2021-09-23	0.310347	0.344729	0.410439	0.355172		2021-09-23	79.5375	73.3505	87.5542	80.1474
2021-09-24	0.310923	0.327168	0.397809	0.3453		2021-09-24	79.8396	73.6516	87.8502	80.4471
2021-09-25	0.311499	0.309608	0.385179	0.335429		2021-09-25	80.1422	73.9365	88.1367	80.7385
2021-09-26	0.312075	0.292048	0.372549	0.325557		2021-09-26	80.4454	74.2053	88.4139	81.0215
2021-09-27	0.312651	0.274488	0.359919	0.315686		2021-09-27	80.7491	74.4579	88.6817	81.2962
2021-09-28	0.313227	0.256927	0.347289	0.305814		2021-09-28	81.0534	74.6943	88.9401	81.5626
2021-09-29	0.313803	0.239367	0.334659	0.295943		2021-09-29	81.3583	74.9146	89.1891	81.8206
2021-09-30	0.314379	0.221807	0.322029	0.286071		2021-09-30	81.6637	75.1187	89.4286	82.0704
2021-10-01	0.314955	0.230511	0.309398	0.284955		2021-10-01	81.9697	75.3308	89.6588	82.3198
2021-10-02	0.315531	0.239216	0.296768	0.283838		2021-10-02	82.2762	75.551	89.8796	82.5689
2021-10-03	0.316107	0.24792	0.284138	0.282722		2021-10-03	82.5833	75.7791	90.091	82.8178
2021-10-04	0.315927	0.256624	0.271508	0.281353		2021-10-04	82.8903	76.0153	90.293	83.0662
2021-10-05	0.315746	0.265329	0.258878	0.279984		2021-10-05	83.197	76.2594	90.4856	83.314
2021-10-06	0.315566	0.274033	0.246248	0.278616		2021-10-06	83.5036	76.5116	90.6688	83.5613
2021-10-07	0.315386	0.282737	0.233618	0.277247		2021-10-07	83.81	76.7718	90.8427	83.8081
2021-10-08	0.315205	0.291442	0.220988	0.275878		2021-10-08	84.1162	77.04	91.0071	84.0544
2021-10-09	0.315025	0.300146	0.208358	0.27451		2021-10-09	84.4222	77.3162	91.1621	84.3002
2021-10-10	0.314845	0.30885	0.195728	0.273141		2021-10-10	84.7281	77.6004	91.3077	84.5454
2021-10-11	0.314664	0.317555	0.183098	0.271772		2021-10-11	85.0338	77.8927	91.4439	84.7901
2021-10-12	0.314484	0.326259	0.170468	0.270403		2021-10-12	85.3393	78.1929	91.5708	85.0343
2021-10-13	0.314304	0.334963	0.157837	0.269035		2021-10-13	85.6447	78.5012	91.6882	85.278
2021-10-14	0.314123	0.343668	0.145207	0.267666		2021-10-14	85.9498	78.8174	91.7962	85.5212
2021-10-15	0.313943	0.352372	0.132577	0.266297		2021-10-15	86.2548	79.1417	91.8949	85.7638
2021-10-16	0.313763	0.361076	0.131828	0.268889		2021-10-16	86.5596	79.474	91.9929	86.0089
2021-10-17	0.313582	0.369781	0.131079	0.271481		2021-10-17	86.8643	79.8143	92.0905	86.2563
2021-10-18	0.313402	0.378485	0.13033	0.274072		2021-10-18	87.1688	80.1626	92.1874	86.5063
2021-10-19	0.313221	0.387189	0.129581	0.276664		2021-10-19	87.4731	80.5189	92.2838	86.7586
2021-10-20	0.313041	0.395894	0.128832	0.279256		2021-10-20	87.7772	80.8832	92.3797	87.0134
2021-10-21	0.312861	0.404598	0.128083	0.281847		2021-10-21	88.0811	81.2555	92.475	87.2706
2021-10-22	0.31268	0.413302	0.127334	0.284439		2021-10-22	88.3849	81.6359	92.5697	87.5302
2021-10-23	0.3125	0.422007	0.126585	0.287031		2021-10-23	88.6885	82.0242	92.6639	87.7922
2021-10-24	0.31232	0.430711	0.125836	0.289622		2021-10-24	88.9919	82.4206	92.7575	88.0567
2021-10-25	0.312139	0.439415	0.125087	0.292214		2021-10-25	89.2951	82.825	92.8506	88.3236
2021-10-26	0.311959	0.44812	0.124338	0.294806		2021-10-26	89.5982	83.2374	92.9431	88.5929
2021-10-27	0.303424	0.456824	0.123589	0.294612		2021-10-27	89.893	83.6578	93.0351	88.8619
2021-10-28	0.294888	0.465529	0.122841	0.294419		2021-10-28	90.1795	84.0862	93.1264	89.1307
2021-10-29	0.286353	0.474233	0.122092	0.294226		2021-10-29	90.4577	84.5226	93.2173	89.3992
2021-10-30	0.277817	0.482937	0.121343	0.294032		2021-10-30	90.7276	84.967	93.3076	89.6674
2021-10-31	0.269282	0.491642	0.120594	0.293839		2021-10-31	90.9892	85.4194	93.3973	89.9353
2021-11-01	0.260746	0.500346	0.119845	0.293646		2021-11-01	91.2425	85.8799	93.4864	90.2029
2021-11-02	0.252211	0.493065	0.119096	0.288124		2021-11-02	91.4875	86.3336	93.5751	90.4654
2021-11-03	0.243676	0.485784	0.118347	0.282602		2021-11-03	91.7242	86.7807	93.6631	90.7227
2021-11-04	0.23514	0.478503	0.117598	0.27708		2021-11-04	91.9527	87.221	93.7506	90.9748
2021-11-05	0.226605	0.471222	0.116849	0.271558		2021-11-05	92.1728	87.6547	93.8375	91.2217
2021-11-06	0.218069	0.463941	0.1161	0.266037		2021-11-06	92.3847	88.0816	93.9239	91.4634
2021-11-07	0.209534	0.45666	0.115351	0.260515		2021-11-07	92.5882	88.5018	94.0097	91.6999
2021-11-08	0.200998	0.449379	0.114602	0.254993		2021-11-08	92.7835	88.9154	94.095	91.9313
2021-11-09	0.192463	0.442098	0.113853	0.249471		2021-11-09	92.9705	89.3222	94.1797	92.1575
2021-11-10	0.183928	0.434817	0.113104	0.243949		2021-11-10	93.1492	89.7224	94.2638	92.3785
2021-11-11	0.175392	0.427536	0.112355	0.238428		2021-11-11	93.3196	90.1158	94.3474	92.5943
2021-11-12	0.166857	0.420255	0.111606	0.232906		2021-11-12	93.4817	90.5025	94.4305	92.8049
2021-11-13	0.158321	0.412974	0.110857	0.227384		2021-11-13	93.6355	90.8826	94.5129	93.0103
2021-11-14	0.149786	0.405693	0.110108	0.221862		2021-11-14	93.781	91.2559	94.5949	93.2106
2021-11-15	0.14125	0.398412	0.109359	0.21634		2021-11-15	93.9182	91.6226	94.6762	93.4057
2021-11-16	0.132715	0.381146	0.10861	0.20749		2021-11-16	94.0471	91.9733	94.757	93.5925
2021-11-17	0.12418	0.363881	0.107861	0.198641		2021-11-17	94.1678	92.3082	94.8373	93.7711
2021-11-18	0.115644	0.346616	0.107112	0.189791		2021-11-18	94.2801	92.6271	94.917	93.9414
2021-11-19	0.107109	0.329351	0.106363	0.180941		2021-11-19	94.3842	92.9302	94.9961	94.1035
2021-11-20	0.0985732	0.312085	0.105614	0.172091		2021-11-20	94.4799	93.2174	95.0747	94.2574
2021-11-21	0.0976812	0.29482	0.104865	0.165789		2021-11-21	94.5748	93.4887	95.1527	94.4054
2021-11-22	0.0967892	0.277555	0.104116	0.159487		2021-11-22	94.6689	93.7442	95.2302	94.5477
2021-11-23	0.0958971	0.26029	0.103367	0.153185		2021-11-23	94.762	93.9837	95.3071	94.6843
2021-11-24	0.0950051	0.243025	0.102618	0.146883		2021-11-24	94.8543	94.2073	95.3834	94.815
2021-11-25	0.0941131	0.225759	0.101869	0.14058		2021-11-25	94.9458	94.4151	95.4592	94.94
2021-11-26	0.093221	0.208494	0.10112	0.134278		2021-11-26	95.0363	94.607	95.5344	95.0592
2021-11-27	0.092329	0.191229	0.100371	0.127976		2021-11-27	95.126	94.7829	95.6091	95.1727
2021-11-28	0.0914369	0.173964	0.099622	0.121674		2021-11-28	95.2149	94.943	95.6832	95.2804
2021-11-29	0.0905449	0.156698	0.098873	0.115372		2021-11-29	95.3028	95.0872	95.7568	95.3823
2021-11-30	0.0896529	0.139433	0.098124	0.10907		2021-11-30	95.3899	95.2155	95.8298	95.4784
2021-12-01	0.0887608	0.122168	0.0973751	0.102768		2021-12-01	95.4761	95.328	95.9023	95.5688
2021-12-02	0.0878688	0.120588	0.0966261	0.101694		2021-12-02	95.5615	95.4389	95.9741	95.6582
2021-12-03	0.0869768	0.119008	0.0958771	0.100621		2021-12-03	95.646	95.5485	96.0455	95.7466
2021-12-04	0.0860847	0.117428	0.0951281	0.0995469		2021-12-04	95.7296	95.6565	96.1162	95.8341
2021-12-05	0.0851927	0.115848	0.0943791	0.0984732		2021-12-05	95.8124	95.7631	96.1865	95.9207
2021-12-06	0.0843007	0.114268	0.0936301	0.0973995		2021-12-06	95.8943	95.8683	96.2561	96.0062
2021-12-07	0.0834086	0.112688	0.0928811	0.0963258		2021-12-07	95.9753	95.972	96.3252	96.0909
2021-12-08	0.0825166	0.111108	0.0921322	0.0952521		2021-12-08	96.0555	96.0742	96.3938	96.1745
2021-12-09	0.0816246	0.109528	0.0913832	0.0941785		2021-12-09	96.1348	96.175	96.4618	96.2572
2021-12-10	0.0807325	0.107948	0.0906342	0.0931048		2021-12-10	96.2132	96.2744	96.5292	96.3389
2021-12-11	0.0798405	0.106368	0.0898852	0.0920311		2021-12-11	96.2908	96.3723	96.5961	96.4197
2021-12-12	0.0789484	0.104788	0.0891362	0.0909574		2021-12-12	96.3675	96.4687	96.6624	96.4995
2021-12-13	0.0780564	0.103207	0.0883872	0.0898837		2021-12-13	96.4433	96.5637	96.7281	96.5784
2021-12-14	0.0771644	0.101627	0.0876383	0.08881		2021-12-14	96.5183	96.6572	96.7934	96.6563
2021-12-15	0.0762723	0.100047	0.0868893	0.0877363		2021-12-15	96.5924	96.7493	96.858	96.7332
2021-12-16	0.0753803	0.0984673	0.0861403	0.0866626		2021-12-16	96.6656	96.8399	96.9221	96.8092
2021-12-17	0.0744883	0.0968873	0.0853913	0.085589		2021-12-17	96.738	96.929	96.9856	96.8842
2021-12-18	0.0735962	0.0953072	0.0846423	0.0845153		2021-12-18	96.8095	97.0167	97.0486	96.9583
2021-12-19	0.0727042	0.0937272	0.0838933	0.0834416		2021-12-19	96.8801	97.103	97.111	97.0314
2021-12-20	0.0718122	0.0921471	0.0831444	0.0823679		2021-12-20	96.9499	97.1878	97.1729	97.1035
2021-12-21	0.0709201	0.0905671	0.0823954	0.0812942		2021-12-21	97.0188	97.2711	97.2342	97.1747
2021-12-22	0.0700281	0.088987	0.0816464	0.0802205		2021-12-22	97.0868	97.353	97.2949	97.2449
2021-12-23	0.0691361	0.087407	0.0808974	0.0791468		2021-12-23	97.154	97.4335	97.3551	97.3142
2021-12-24	0.068244	0.0858269	0.0801484	0.0780731		2021-12-24	97.2203	97.5124	97.4147	97.3825
2021-12-25	0.067352	0.0842469	0.0793994	0.0769994		2021-12-25	97.2857	97.59	97.4738	97.4498
2021-12-26	0.06646	0.0826669	0.0786505	0.0759258		2021-12-26	97.3503	97.666	97.5323	97.5162
2021-12-27	0.0655679	0.0810868	0.0779015	0.0748521		2021-12-27	97.414	97.7407	97.5903	97.5816
2021-12-28	0.0646759	0.0795068	0.0771525	0.0737784		2021-12-28	97.4768	97.8138	97.6477	97.6461
2021-12-29	0.0637838	0.0779267	0.0764035	0.0727047		2021-12-29	97.5388	97.8855	97.7045	97.7096
2021-12-30	0.0628918	0.0763467	0.0756545	0.071631		2021-12-30	97.5999	97.9558	97.7608	97.7722
2021-12-31	0.0619998	0.0747666	0.0749055	0.0705573		2021-12-31	97.6601	98.0246	97.8165	97.8337
2022-01-01	0.0611077	0.0731866	0.0741565	0.0694836		2022-01-01	97.7195	98.092	97.8717	97.8944
2022-01-02	0.0602157	0.0716065	0.0734076	0.0684099		2022-01-02	97.778	98.1579	97.9263	97.954
2022-01-03	0.0593237	0.0700265	0.0726586	0.0673362		2022-01-03	97.8356	98.2223	97.9804	98.0128
2022-01-04	0.0584316	0.0684464	0.0719096	0.0662626		2022-01-04	97.8924	98.2853	98.0339	98.0705
2022-01-05	0.0575396	0.0668664	0.0711606	0.0651889		2022-01-05	97.9483	98.3468	98.0868	98.1273
2022-01-06	0.0566476	0.0652863	0.0704116	0.0641152		2022-01-06	98.0033	98.4069	98.1392	98.1831
2022-01-07	0.0557555	0.0637063	0.0696626	0.0630415		2022-01-07	98.0575	98.4655	98.191	98.238
2022-01-08	0.0548635	0.0621263	0.0689137	0.0619678		2022-01-08	98.1108	98.5227	98.2423	98.2919
2022-01-09	0.0539715	0.0605462	0.0681647	0.0608941		2022-01-09	98.1632	98.5784	98.293	98.3449
2022-01-10	0.0530794	0.0589662	0.0674157	0.0598204		2022-01-10	98.2148	98.6327	98.3432	98.3969
2022-01-11	0.0521874	0.0573861	0.0666667	0.0587467		2022-01-11	98.2655	98.6855	98.3928	98.4479
2022-01-12	0.0512953	0.0558061	0.0659177	0.057673		2022-01-12	98.3153	98.7368	98.4418	98.498
2022-01-13	0.0504033	0.054226	0.0651687	0.0565994		2022-01-13	98.3643	98.7867	98.4903	98.5471
2022-01-14	0.0495113	0.052646	0.0644198	0.0555257		2022-01-14	98.4124	98.8352	98.5382	98.5953
2022-01-15	0.0486192	0.0510659	0.0636708	0.054452		2022-01-15	98.4596	98.8822	98.5856	98.6425
2022-01-16	0.0477272	0.0494859	0.0636513	0.0536215		2022-01-16	98.506	98.9277	98.633	98.6889
2022-01-17	0.0468352	0.0479058	0.0636318	0.0527909		2022-01-17	98.5515	98.9718	98.6803	98.7345
2022-01-18	0.0459431	0.0463258	0.0636123	0.0519604		2022-01-18	98.5961	99.0144	98.7276	98.7794
2022-01-19	0.0450511	0.0447457	0.0635928	0.0511299		2022-01-19	98.6399	99.0556	98.775	98.8235
2022-01-20	0.0441591	0.0431657	0.0635733	0.0502994		2022-01-20	98.6828	99.0953	98.8223	98.8668
2022-01-21	0.0449342	0.04287	0.0635538	0.0504527		2022-01-21	98.7264	99.1348	98.8695	98.9102
2022-01-22	0.0457093	0.0425744	0.0635343	0.050606		2022-01-22	98.7708	99.174	98.9168	98.9539
2022-01-23	0.0464844	0.0422787	0.0635148	0.0507593		2022-01-23	98.816	99.2129	98.9641	98.9976
2022-01-24	0.0472595	0.0419831	0.0634953	0.0509126		2022-01-24	98.8619	99.2515	99.0113	99.0416
2022-01-25	0.0480346	0.0416874	0.0634758	0.0510659		2022-01-25	98.9086	99.2899	99.0585	99.0857
2022-01-26	0.0488097	0.0413918	0.0634563	0.0512193		2022-01-26	98.956	99.328	99.1057	99.1299
2022-01-27	0.0495848	0.0410961	0.0634368	0.0513726		2022-01-27	99.0041	99.3658	99.1529	99.1743
2022-01-28	0.0503599	0.0408005	0.0634173	0.0515259		2022-01-28	99.0531	99.4033	99.2001	99.2188
2022-01-29	0.051135	0.0405048	0.0633978	0.0516792		2022-01-29	99.1028	99.4406	99.2473	99.2635
2022-01-30	0.0519101	0.0402091	0.0633783	0.0518325		2022-01-30	99.1532	99.4776	99.2944	99.3084
2022-01-31	0.0526852	0.0399135	0.0633588	0.0519858		2022-01-31	99.2044	99.5143	99.3416	99.3534
2022-02-01	0.0534603	0.0396178	0.0633393	0.0521391		2022-02-01	99.2563	99.5508	99.3887	99.3986
2022-02-02	0.0542354	0.0393222	0.0633198	0.0522925		2022-02-02	99.309	99.587	99.4358	99.4439
2022-02-03	0.0550105	0.0390265	0.0633003	0.0524458		2022-02-03	99.3624	99.6229	99.4829	99.4894
2022-02-04	0.0557856	0.0387309	0.0632808	0.0525991		2022-02-04	99.4166	99.6585	99.53	99.5351
2022-02-05	0.0565607	0.0384352	0.0632613	0.0527524		2022-02-05	99.4716	99.6939	99.5771	99.5808
2022-02-06	0.0573358	0.0381396	0.0632419	0.0529057		2022-02-06	99.5273	99.729	99.6241	99.6268
2022-02-07	0.0581109	0.0378439	0.0632224	0.053059		2022-02-07	99.5837	99.7638	99.6711	99.6729
2022-02-08	0.058886	0.0375482	0.0632029	0.0532124		2022-02-08	99.6409	99.7984	99.7182	99.7192
2022-02-09	0.0596611	0.0372526	0.0631834	0.0533657		2022-02-09	99.6989	99.8327	99.7652	99.7656
2022-02-10	0.0604362	0.0369569	0.0631639	0.053519		2022-02-10	99.7576	99.8667	99.8122	99.8122
2022-02-11	0.0612113	0.0366613	0.0631444	0.0536723		2022-02-11	99.8171	99.9004	99.8591	99.8589
2022-02-12	0.0619864	0.0363656	0.0631249	0.0538256		2022-02-12	99.8773	99.9339	99.9061	99.9058
2022-02-13	0.0627615	0.03607	0.0631054	0.0539789		2022-02-13	99.9383	99.9671	99.9531	99.9528
2022-02-14	0.0635366	0.0357743	0.0630859	0.0541323		2022-02-14	100	100	100	100

## Sheet: Viking Bank Data
Locality	Shell ID	Sample no.	Sampling method	Tray	Tray no.	Distance to previous (mm)	Total growth (mm)	Annual growth (%)	δ¹³C (‰)	δ¹³C sdev (‰)	δ¹⁸O (‰)	δ¹⁸O sdev (‰)	Increment	Year		ontogenetic age	calendar year	increment width (mm)	starting gl at (mm)	Shell
Viking Banks	WH302-805-BoxM-A2R	1	drilling	IV (Bernd)	D4				1.11845	0.0207512	2.03968	0.0506405				2	1951	3.68739		WH302-805
Viking Banks	WH302-805-BoxM-A2R	2	drilling	IV (Bernd)	D5				1.56152	0.0352513	2.51327	0.0429748				2		4.84643		WH302-805
Viking Banks	WH302-805-BoxM-A2R	3	drilling	IV (Bernd)	D6				1.37936	0.0334383	2.25275	0.0593162				3		6.15373		WH302-804
Viking Banks	WH302-805-BoxM-A2R	4	drilling	IV (Bernd)	D7				1.41833	0.0349086	2.37684	0.0839031
Viking Banks	WH302-805-BoxM-A2R	5	drilling	IV (Bernd)	D8				1.59163	0.0275692	2.39013	0.0388888
Viking Banks	WH302-805-BoxM-A2R	6	drilling	IV (Bernd)	D9				1.7665	0.0199702	2.42279	0.0329426	1	1950
Viking Banks	WH302-805-BoxM-A2R	7	drilling	IV (Bernd)	D10	0.570974			1.58245	0.0479943	2.37915	0.0463766	1	1950
Viking Banks	WH302-805-BoxM-A2R	8	drilling	IV (Bernd)	D11	0.54992		0.149135	1.80327	0.024293	2.63736	0.0528559	2	1951
Viking Banks	WH302-805-BoxM-A2R	9	drilling	IV (Bernd)	D12	0.618029		0.316741	1.77982	0.025422	2.65301	0.0626984	2	1951
Viking Banks	WH302-805-BoxM-A2R	10	drilling	IV (Bernd)	D13	0.49826		0.451866	1.70296	0.0314132	2.51018	0.0700991	2	1951
Viking Banks	WH302-805-BoxM-A2R	11	drilling	IV (Bernd)	D14	0.592356		0.61251	1.48372	0.0291544	2.48462	0.054122	2	1951
Viking Banks	WH302-805-BoxM-A2R	12	drilling	IV (Bernd)	D15	0.558973		0.7641	1.60929	0.0218041	2.58387	0.051629	2	1951
Viking Banks	WH302-805-BoxM-A2R	13	drilling	IV (Bernd)	A1	0.494298		0.898151	1.56552	0.00597018	2.47087	0.0642378	2	1951
Viking Banks	WH302-805-BoxM-A2R	14	drilling	IV (Bernd)	A2	0.375559			1.80983	0.0488773	2.81962	0.033169	3	1952
Viking Banks	WH302-805-BoxM-A2R	15	drilling	IV (Bernd)	A3				1.79781	0.0349017	2.62102	0.0346334
Viking Banks	WH302-805-BoxM-A2R	16	drilling	IV (Bernd)	A4				1.87398	0.0238009	2.66978	0.11977
Viking Banks	WH302-805-BoxM-A2R	17	drilling	IV (Bernd)	A5				1.94746	0.0174457	2.7236	0.0284181
Viking Banks	WH302-805-BoxM-A2R	18	drilling	IV (Bernd)	A6				2.07968	0.0186877	2.79848	0.0601325
Viking Banks	WH302-805-BoxM-A2R	19	drilling	IV (Bernd)	A7				2.10484	0.024351	2.84094	0.0627122
Viking Banks	WH302-805-BoxM-A2R	20	drilling	IV (Bernd)	A8				1.87911	0.0262706	2.45927	0.0399671
Viking Banks	WH302-805-BoxM-A2R	21	drilling	IV (Bernd)	A9				1.8428	0.0443042	2.49976	0.050732
Viking Banks	WH302-805-BoxM-A2R	22	drilling	IV (Bernd)	A10				1.9617	0.0246014	2.6916	0.0398225
Viking Banks	WH302-805-BoxM-A2R	23	drilling	IV (Bernd)	A11				1.57205	0.0298504	2.37428	0.07319
Viking Banks	WH302-805-BoxM-A2R	24	drilling	IV (Bernd)	A12				1.78135	0.0305382	2.78361	0.0786595
Viking Banks	WH302-805-BoxM-A2R	25	drilling	IV (Bernd)	A13				1.69646	0.0263023	2.31264	0.0694943
Viking Banks	WH302-805-BoxM-A2R	26	drilling	IV (Bernd)	A14				2.01663	0.0198494	2.73398	0.086639
Viking Banks	WH302-805-BoxM-A2R	1	surface milling	IV (Bernd)	A15			0	0.957882	0.022638	2.55101	0.0659718	1	1972
Viking Banks	WH302-805-BoxM-A2R	2	surface milling	IV (Bernd)	B1			0.25	0.914535	0.0299138	2.62999	0.0466317	1	1972
Viking Banks	WH302-805-BoxM-A2R	3	surface milling	IV (Bernd)	B2			0.5	1.03861	0.0217451	2.60553	0.0281976	1	1972
Viking Banks	WH302-805-BoxM-A2R	4	surface milling	IV (Bernd)	B3			0.75	0.708175	0.0157783	2.45784	0.0262136	1	1972
Viking Banks	WH302-805-BoxM-A2R	5	surface milling	IV (Bernd)	B4			1	0.875671	0.0276401	2.47724	0.0523018	1	1972
Viking Banks	WH302-805-BoxM-A2R	6	surface milling	IV (Bernd)	B5				1.02714	0.0145518	2.58967	0.0538424	2	1973
Viking Banks	WH302-805-BoxM-A2R	7	surface milling	IV (Bernd)	B6				0.878179	0.0199123	2.48719	0.0631775	2	1973
Viking Banks	WH302-805-BoxM-A2R	8	surface milling	IV (Bernd)	B7				1.08936	0.0265134	2.44752	0.0418025	2	1973
Viking Banks	WH302-805-BoxM-A2R	9	surface milling	IV (Bernd)	B8			0	1.28936	0.0198339	2.87581	0.064648	3	1974
Viking Banks	WH302-805-BoxM-A2R	10	surface milling	IV (Bernd)	B9			0.166	1.44642	0.015083	2.94399	0.047139	3	1974
Viking Banks	WH302-805-BoxM-A2R	11	surface milling	IV (Bernd)	B10			0.333	1.40351	0.0223561	2.80671	0.0505568	3	1974
Viking Banks	WH302-805-BoxM-A2R	12	surface milling	IV (Bernd)	B11			0.5	0.968248	0.0243042	2.63642	0.053072	3	1974
Viking Banks	WH302-805-BoxM-A2R	13	surface milling	IV (Bernd)	B12			0.667	1.28176	0.0207024	2.62182	0.0405933	3	1974
Viking Banks	WH302-805-BoxM-A2R	14	surface milling	IV (Bernd)	B13			0.833	1.30968	0.0281252	2.61666	0.0544008	3	1974
Viking Banks	WH302-805-BoxM-A2R	15	surface milling	IV (Bernd)	B14			1	1.23503	0.0175235	2.4258	0.0221221	3	1974
Viking Banks	WH302-805-BoxM-A2R	16	surface milling	IV (Bernd)	B15				1.83228	0.0320744	2.71112	0.056806	4	1975
Viking Banks	WH302-805-BoxM-A2R	17	surface milling	IV (Bernd)	C1
Viking Banks	WH302-805-BoxM-A2R	18	surface milling	IV (Bernd)	C2				1.23727	0.0269229	2.52143	0.0311637	4	1975
Viking Banks	WH302-805-BoxM-A2R	19	surface milling	IV (Bernd)	C3				1.35094	0.0289251	2.71035	0.0570033	5	1976
Viking Banks	WH302-805-BoxM-A2R	20	surface milling	IV (Bernd)	C4				1.49545	0.0219175	2.66466	0.0396825	5	1976
Viking Banks	WH302-805-BoxM-A2R	21	surface milling	IV (Bernd)	C5				1.63508	0.0124889	2.50761	0.0286232	5	1976
Viking Banks	WH302-805-BoxM-A2R	22	surface milling	IV (Bernd)	C6			0.0957932	1.68651	0.0219883	3.0119	0.0497656	6	1977
Viking Banks	WH302-805-BoxM-A2R	23	surface milling	IV (Bernd)	C7			0.191477	1.61836	0.0394753	3.03819	0.0523741	6	1977
Viking Banks	WH302-805-BoxM-A2R	24	surface milling	IV (Bernd)	C8			0.28727	1.9199	0.0239144	2.99686	0.0664664	6	1977
Viking Banks	WH302-805-BoxM-A2R	25	surface milling	IV (Bernd)	C9			0.364322	1.99662	0.0284928	2.81181	0.0407313	6	1977
Viking Banks	WH302-805-BoxM-A2R	26	surface milling	IV (Bernd)	C10			0.496001	1.89922	0.0361473	2.82207	0.0483924	6	1977
Viking Banks	WH302-805-BoxM-A2R	27	surface milling	IV (Bernd)	C11			0.608069	1.86148	0.0221136	2.80429	0.0269136	6	1977
Viking Banks	WH302-805-BoxM-A2R	28	surface milling	IV (Bernd)	C12			0.7112	1.99909	0.0279938	2.68307	0.0493495	6	1977
Viking Banks	WH302-805-BoxM-A2R	29	surface milling	IV (Bernd)	C13			0.819829	2.00749	0.0318923	2.77882	0.0642426	6	1977
Viking Banks	WH302-805-BoxM-A2R	30	surface milling	IV (Bernd)	C14			0.904408	1.43874	0.0323868	2.49885	0.0617303	6	1977
Viking Banks	WH302-805-BoxM-A2R	31	surface milling	IV (Bernd)	C15			1	1.84628	0.0178368	2.83165	0.0645369	7	1978
Viking Banks	WH302-805-BoxM-A2R	32	surface milling	IV (Bernd)	D1			0.166	2.02263	0.0236656	2.72798	0.0394666	7	1978
Viking Banks	WH302-805-BoxM-A2R	33	surface milling	IV (Bernd)	D2			0.333	2.1166	0.0556756	2.8811	0.102891	7	1978
Viking Banks	WH302-805-BoxM-A2R	34	surface milling	IV (Bernd)	D3			0.5	2.00526	0.0137744	2.71413	0.0522648	7	1978
Viking Banks	WH302-805-BoxM-A2R	35	surface milling	IV (Bernd)	D4			0.667	2.54233	0.0264536	2.88404	0.0505223	7	1978
Viking Banks	WH302-805-BoxM-A2R	36	surface milling	IV (Bernd)	D5			0.833	2.01021	0.0210093	2.69008	0.0495008	7	1978
Viking Banks	WH302-805-BoxM-A2R	37	surface milling	IV (Bernd)	D6			1	1.78209	0.0118801	2.61027	0.067118	7	1978
Viking Banks	WH302-805-BoxM-A2R	38	surface milling	IV (Bernd)	D7				2.22716	0.0183747	2.94384	0.0275264	8	1979
Viking Banks	WH302-805-BoxM-A2R	39	surface milling	IV (Bernd)	D8				1.87571	0.0547119	2.90479	0.09535	8	1979
Viking Banks	WH302-805-BoxM-A2R	40	surface milling	IV (Bernd)	D9
Viking Banks	WH302-805-BoxM-A2R	41	surface milling	IV (Bernd)	D10				1.99812	0.0297403	2.62541	0.0718279	8	1979
Viking Banks	WH302-805-BoxM-A2R	42	surface milling	IV (Bernd)	D11
Viking Banks	WH302-805-BoxM-A2R	43	surface milling	IV (Bernd)	D12				1.94338	0.0169641	2.59686	0.0376986	8	1979
Viking Banks	WH302-805-BoxM-A2R	44	surface milling	IV (Bernd)	D13
Viking Banks	WH302-805-BoxM-A2R	45	surface milling	IV (Bernd)	D14				1.85675	0.0442358	2.85551	0.0891545	9	1980
Viking Banks	WH302-805-BoxM-A2R	46	surface milling	IV (Bernd)	D15				1.59485	0.0243749	2.70173	0.0336327	9	1980
Viking Banks	WH302-804-BoxM-A1R	1	drilling	IV (Bernd)	A1			0	1.72674	0.0330037	2.52425	0.0934081	4	1975
Viking Banks	WH302-804-BoxM-A1R	2	drilling	IV (Bernd)	A2			0.2	1.7893	0.0280233	2.66649	0.0710855	4	1975
Viking Banks	WH302-804-BoxM-A1R	3	drilling	IV (Bernd)	A3			0.4	1.84556	0.0373647	2.72529	0.0613292	4	1975
Viking Banks	WH302-804-BoxM-A1R	4	drilling	IV (Bernd)	A4
Viking Banks	WH302-804-BoxM-A1R	5	drilling	IV (Bernd)	A5			0.6	2.12673	0.0750212	2.69943	0.089823	4	1975
Viking Banks	WH302-804-BoxM-A1R	6	drilling	IV (Bernd)	A6			0.8	2.1045	0.104096	2.40901	0.153614	4	1975
Viking Banks	WH302-804-BoxM-A1R	7	drilling	IV (Bernd)	A7
Viking Banks	WH302-804-BoxM-A1R	8	drilling	IV (Bernd)	A8			1	1.79365	0.102961	2.04316	0.138763	4	1975
Viking Banks	WH302-804-BoxM-A1R	9	drilling	IV (Bernd)	A9			0	1.94481	0.0384501	2.57812	0.129689	5	1976
Viking Banks	WH302-804-BoxM-A1R	10	drilling	IV (Bernd)	A10			0.125	2.10515	0.0663424	2.37407	0.131452	5	1976
Viking Banks	WH302-804-BoxM-A1R	11	drilling	IV (Bernd)	A11			0.25	2.19249	0.0314584	2.60204	0.0695306	5	1976
Viking Banks	WH302-804-BoxM-A1R	12	drilling	IV (Bernd)	A12			0.375	1.98727	0.0486228	2.5548	0.145117	5	1976
Viking Banks	WH302-804-BoxM-A1R	13	drilling	IV (Bernd)	A13			0.5	1.80372	0.0721656	2.75275	0.142536	5	1976
Viking Banks	WH302-804-BoxM-A1R	14	drilling	IV (Bernd)	A14			0.625	1.78194	0.095115	2.76652	0.135766	5	1976
Viking Banks	WH302-804-BoxM-A1R	15	drilling	IV (Bernd)	A15			0.75	1.72911	0.149169	2.49847	0.112145	5	1976
Viking Banks	WH302-804-BoxM-A1R	16	drilling	IV (Bernd)	B1			0.875	1.76153	0.0488475	2.87029	0.0892483	5	1976
Viking Banks	WH302-804-BoxM-A1R	17	drilling	IV (Bernd)	B2			1	1.56552	0.0647696	2.78798	0.125165	5	1976
Viking Banks	WH302-804-BoxM-A1R	1	surface milling	IV (Bernd)	B3			0	1.3973	0.0316103	2.5424	0.0253386	1	1972
Viking Banks	WH302-804-BoxM-A1R	2	surface milling	IV (Bernd)	B4			0.1	1.60534	0.0359394	2.66322	0.0550921	1	1972
Viking Banks	WH302-804-BoxM-A1R	3	surface milling	IV (Bernd)	B5			0.2	1.08871	0.0244878	2.64314	0.0720426	1	1972
Viking Banks	WH302-804-BoxM-A1R	4	surface milling	IV (Bernd)	B6			0.3	1.35885	0.0289966	2.63979	0.0474361	1	1972
Viking Banks	WH302-804-BoxM-A1R	5	surface milling	IV (Bernd)	B7			0.4	1.39489	0.0153513	2.65914	0.0475312	1	1972
Viking Banks	WH302-804-BoxM-A1R	6	surface milling	IV (Bernd)	B8			0.5	1.30345	0.0329337	2.41542	0.0446796	1	1972
Viking Banks	WH302-804-BoxM-A1R	7	surface milling	IV (Bernd)	B9			0.6	1.29219	0.0177649	2.45512	0.0530666	1	1972
Viking Banks	WH302-804-BoxM-A1R	8	surface milling	IV (Bernd)	B10			0.7	0.814579	0.0211074	2.38666	0.0528846	1	1972
Viking Banks	WH302-804-BoxM-A1R	9	surface milling	IV (Bernd)	B11			0.8	0.579635	0.018363	2.4349	0.0690362	1	1972
Viking Banks	WH302-804-BoxM-A1R	10	surface milling	IV (Bernd)	B12			0.9	0.864084	0.0247174	2.44972	0.0232043	1	1972
Viking Banks	WH302-804-BoxM-A1R	11	surface milling	IV (Bernd)	B13			1	0.589396	0.0233816	2.36193	0.0627711	1	1972
Viking Banks	WH302-804-BoxM-A1R	12	surface milling	IV (Bernd)	B14			0.061888	1.22554	0.0219777	2.82131	0.0281382	2	1973
Viking Banks	WH302-804-BoxM-A1R	13	surface milling	IV (Bernd)	B15			0.134374	1.10572	0.0191882	2.73671	0.0483215	2	1973
Viking Banks	WH302-804-BoxM-A1R	14	surface milling	IV (Bernd)	C1			0.21027	0.738902	0.0165094	2.77571	0.0375076	2	1973
Viking Banks	WH302-804-BoxM-A1R	15	surface milling	IV (Bernd)	C2			0.280164	1.11377	0.00697048	2.75326	0.0411306	2	1973
Viking Banks	WH302-804-BoxM-A1R	16	surface milling	IV (Bernd)	C3			0.345742					2	1973
Viking Banks	WH302-804-BoxM-A1R	17	surface milling	IV (Bernd)	C4			0.397871	1.05362	0.0138715	2.59967	0.0951706	2	1973
Viking Banks	WH302-804-BoxM-A1R	18	surface milling	IV (Bernd)	C5			0.478304	1.17342	0.0407194	2.48224	0.0878411	2	1973
Viking Banks	WH302-804-BoxM-A1R	19	surface milling	IV (Bernd)	C6			0.544173	1.01267	0.0231944	2.51551	0.0358336	2	1973
Viking Banks	WH302-804-BoxM-A1R	20	surface milling	IV (Bernd)	C7			0.608971					2	1973
Viking Banks	WH302-804-BoxM-A1R	21	surface milling	IV (Bernd)	C8			0.67279	1.52714	0.00994662	2.56197	0.0291893	2	1973
Viking Banks	WH302-804-BoxM-A1R	22	surface milling	IV (Bernd)	C9			0.727014	1.59136	0.0198625	2.46938	0.0357614	2	1973
Viking Banks	WH302-804-BoxM-A1R	23	surface milling	IV (Bernd)	C10			0.808194	1.60563	0.0179707	2.55037	0.0443143	2	1973
Viking Banks	WH302-804-BoxM-A1R	24	surface milling	IV (Bernd)	C11			0.876214	1.48733	0.0435471	2.42607	0.0659834	2	1973
Viking Banks	WH302-804-BoxM-A1R	25	surface milling	IV (Bernd)	C12			0.930159	1.38609	0.0162569	2.57139	0.0392015	2	1973
Viking Banks	WH302-804-BoxM-A1R	26	surface milling	IV (Bernd)	C13			1	1.7256	0.0550608	2.48605	0.06367	2	1973
Viking Banks	WH302-804-BoxM-A1R	27	surface milling	IV (Bernd)	C14				1.85326	0.0375218	2.73026	0.0242315	3	1974
Viking Banks	WH302-804-BoxM-A1R	28	surface milling	IV (Bernd)	C15			0.125	1.85361	0.0168745	2.68675	0.0445256	3	1974
Viking Banks	WH302-804-BoxM-A1R	29	surface milling	IV (Bernd)	D1			0.25	1.96194	0.0351409	2.76753	0.0584522	3	1974
Viking Banks	WH302-804-BoxM-A1R	30	surface milling	IV (Bernd)	D2			0.375	1.8481	0.0230645	2.62004	0.0419337	3	1974
Viking Banks	WH302-804-BoxM-A1R	31	surface milling	IV (Bernd)	D3			0.5	1.68629	0.0149759	2.42519	0.0378367	3	1974
Viking Banks	WH302-804-BoxM-A1R	32	surface milling	IV (Bernd)	D4			0.625	1.73048	0.015099	2.39283	0.0661416	3	1974
Viking Banks	WH302-804-BoxM-A1R	33	surface milling	IV (Bernd)	D5			0.75	1.78542	0.0322616	2.57653	0.0394375	3	1974
Viking Banks	WH302-804-BoxM-A1R	34	surface milling	IV (Bernd)	D6			0.875	1.3808	0.0427562	2.3072	0.0598773	3	1974
Viking Banks	WH302-804-BoxM-A1R	35	surface milling	IV (Bernd)	D7			1	1.85846	0.0209516	2.59422	0.047698	3	1974
Viking Banks	WH302-804-BoxM-A1R	36	surface milling	IV (Bernd)	D8				2.12578	0.0100506	2.75729	0.0535432	4
Viking Banks	WH302-804-BoxM-A1R	1	drilling	IV (Bernd)	D9				2.11312	0.0448734	2.45125	0.0883796
Viking Banks	WH302-804-BoxM-A1R	2	drilling	IV (Bernd)	D10				2.09768	0.0329381	2.42475	0.048669
Viking Banks	WH302-804-BoxM-A1R	3	drilling	IV (Bernd)	D11				1.98981	0.0651937	2.60605	0.122781
Viking Banks	WH302-804-BoxM-A1R	4	drilling	IV (Bernd)	D12				2.25752	0.0254636	2.73367	0.0574552
Viking Banks	WH302-804-BoxM-A1R	5	drilling	IV (Bernd)	D13				2.13869	0.023457	2.45557	0.0402381
Viking Banks	WH302-804-BoxM-A1R	6	drilling	IV (Bernd)	D14				1.99758	0.0266925	2.30601	0.0881118
Viking Banks	WH302-804-BoxM-A1R	7	drilling	IV (Bernd)	D15				1.79202	0.0244709	2.44925	0.0362709
Viking Banks	WH302-804-BoxM-A1R	8	drilling	IV (Bernd)	A1				1.89959	0.026022	2.70131	0.0543315
Viking Banks	WH302-804-BoxM-A1R	9	drilling	IV (Bernd)	A2				2.04209	0.0253426	2.75345	0.0773289
Viking Banks	WH302-804-BoxM-A1R	10	drilling	IV (Bernd)	A3				2.32987	0.00968568	3.02522	0.0657965
Viking Banks	WH302-804-BoxM-A1R	11	drilling	IV (Bernd)	A4				2.14665	0.0657151	2.82791	0.104678
Viking Banks	WH302-804-BoxM-A1R	12	drilling	IV (Bernd)	A5				1.79979	0.026055	2.99387	0.0618799
Viking Banks	WH302-804-BoxM-A1R	13	drilling	IV (Bernd)	A6				2.02539	0.00829692	3.00814	0.0633079
Viking Banks	WH302-804-BoxM-A1R	14	drilling	IV (Bernd)	A7				2.06027	0.0400404	2.93226	0.116263

## Sheet: Viking Bank calculation
d18O(s, pred)			d18O(w)	0.1			shallow?	MOL8216_08VN16-A1L		yr x1	yr x2			shell			549.92	2888.97			ann incr%	time%									date	daily growth%	daily growth%	cumul growth%		shallow?	464.255	11341.8			ann incr%	time%
arbitrary date	SST	d18O(s)reco		arbitrary date	interpolated d18O(s)		distance from hinge (mm)	sample#	d13C	Date				d18O			date	distance	milling width	cumulative milling	s%	t%	#days	Date	d18O	%ann incr/d		Date	%ann incr/d			interpolated	cumul	normalized			date	distance	milling width	cumulative milling	s%	t%	#days	Date	d18O	%ann incr/d		Date	%ann incr/d
2020-07-15	8.24869	2.67592		2020-07-16	2.67409		357.762	1	1.11845					2.03968			2020-11-15	3438.89	549.92	0	0	0	0	2020-11-15	1.64019	0.185016		2020-11-15	0.159544		2021-01-15	0.340568	0.340568	0.239288			2020-11-14	11806.1	464.255	0	0	0	0	2020-11-14	2.3673	0.105265		2020-11-14	0.105265
2020-08-15	8.4948	2.61922		2020-07-17	2.67227		824.65	2	1.56152					2.51327			2021-02-12	3988.81	549.92	549.92	16.4664	24.7911	89	2021-02-12	1.73258	0.218576		2021-02-12	0.423662		2021-01-16	0.343536	0.684104	0.48066			2021-02-22	12270.3	464.255	464.255	10.5265	27.3973	100	2021-02-22	2.64903	0.300586		2021-02-22	0.300586
2020-09-15	8.7689	2.55606		2020-07-18	2.67044		1263.66	3	1.37936					2.25275			2021-05-03	4606.84	618.029	1133.89	33.9525	47.0752	169	2021-05-03	1.7052	0.185696		2021-05-03	0.387706		2021-01-17	0.346504	1.03061	0.724118			2021-03-29	12734.1	463.723	928.244	21.0471	36.9863	135	2021-03-29	2.66754	0.250488		2021-03-29	0.250488
2020-10-15	9.1588	2.46622		2020-07-19	2.66861		1806.87	4	1.41833					2.37684			2021-08-01	5105.1	498.26	1692.04	50.6652	72.1448	259	2021-08-01	1.72953	0.544277		2021-08-01	0.422462		2021-01-18	0.349471	1.38008	0.969661			2021-05-10	13198.3	464.255	1392.23	31.5676	48.4932	177	2021-05-10	2.67292	0.243508		2021-05-10	0.243508
2020-11-15	9.52641	2.38152		2020-07-20	2.66678		2279.7	5	1.59163					2.39013			2021-08-31	5697.46	592.356	2237.35	66.9935	80.5014	289	2021-08-31	1.59452	0.574576		2021-08-31	0.497554		2021-01-19	0.352439	1.73252	1.21729			2021-06-18	13571.8	373.427	1811.07	41.0644	59.1781	216	2021-06-18	2.73424	0.441098		2021-06-18	0.441098
2020-12-15	8.98809	2.50556		2020-07-21	2.66495		2867.92	6	1.7665					2.42279			2021-09-30	6256.43	558.973	2813.01	84.2308	88.8579	319	2021-09-30	1.55454	0.39423		2021-09-30	0.425467		2021-01-20	0.355407	2.08792	1.467			2021-07-14	14209.9	638.173	2316.87	52.5329	66.3014	242	2021-07-14	2.70479	0.744028		2021-07-14	0.744028
2021-01-15	8.1748	2.69295		2020-07-22	2.66312		3438.89	7	1.58245	2020-11-15				2.37915			2021-11-09	6750.73	494.298	3339.65	100	100	359	2021-11-09	1.48173	0.108527		2021-11-09	0.303856		2021-01-21	0.358374	2.4463	1.7188			2021-08-01	14753.1	543.133	2907.53	65.9255	71.2329	260	2021-08-01	2.82409	0.591198		2021-08-01	0.591198
2021-02-15	7.6774	2.80756		2020-07-23	2.66129		3988.81	8	1.80327	2021-02-12				2.63736			2022-03-09	7126.29	375.559	3774.58	113.023	133.426	479	2022-03-09	1.15455	0.00253251		2022-03-09	0.309594		2021-01-22	0.361342	2.80764	1.97268			2021-08-21	15252.9	499.817	3429	77.7494	76.7123	280	2021-08-21	2.74329	0.581747		2021-08-21	0.581747
2021-03-15	7.36579	2.87936		2020-07-24	2.65946		4606.84	9	1.77982	2021-05-03				2.65301																	2021-01-23	0.364309	3.17195	2.22865			2021-09-10	15779.3	526.461	3942.14	89.3844	82.1918	300	2021-09-10	2.7708	0.163317		2021-09-10	0.163317
2021-04-15	7.3545	2.88196		2020-07-25	2.65763		5105.1	10	1.70296	2021-08-01				2.51018																	2021-01-24	0.367277	3.53923	2.48671			2021-11-14	16189.2	409.908	4410.32	100	100	365	2021-11-14	2.76341	0.116463		2021-11-14	0.116463
2021-05-15	7.5782	2.83041		2020-07-26	2.6558		5697.46	11	1.48372	2021-08-31				2.48462																	2021-01-25	0.370245	3.90947	2.74684			2022-02-07	16652.5	463.279	4846.92	109.899	123.288	450	2022-02-07	2.68736	0.0673422		2022-02-07	0.0673422
2021-06-15	7.89841	2.75663		2020-07-27	2.65397		6256.43	12	1.60929	2021-09-30				2.58387																	2021-01-26	0.373212	4.28268	3.00907			2022-07-20	17157.5	504.944	5331.03	120.876	167.945	613	2022-07-20	2.72798			2022-07-20
2021-07-15	8.24869	2.67592		2020-07-28	2.65214		6750.73	13	1.56552	2021-11-09				2.47087																	2021-01-27	0.37618	4.65886	3.27338
2021-08-15	8.4948	2.61922		2020-07-29	2.65031		7126.29	14	1.80983	2022-03-09				2.81962																	2021-01-28	0.379147	5.03801	3.53977
2021-09-15	8.7689	2.55606		2020-07-30	2.64848		7657.23	15	1.79781					2.62102																	2021-01-29	0.382115	5.42013	3.80825
2021-10-15	9.1588	2.46622		2020-07-31	2.64666		8220.76	16	1.87398					2.66978																	2021-01-30	0.385083	5.80521	4.07881
2021-11-15	9.52641	2.38152		2020-08-01	2.64483		8702.55	17	1.94746					2.7236																	2021-01-31	0.38805	6.19326	4.35146
2021-12-15	8.98809	2.50556		2020-08-02	2.643		9173.13	18	2.07968					2.79848																	2021-02-01	0.391018	6.58428	4.6262
2022-01-15	8.1748	2.69295		2020-08-03	2.64117		9555	19	2.10484					2.84094																	2021-02-02	0.393986	6.97826	4.90301
2022-02-15	7.6774	2.80756		2020-08-04	2.63934		9963.75	20	1.87911					2.45927																	2021-02-03	0.396953	7.37522	5.18192
2022-03-15	7.36579	2.87936		2020-08-05	2.63751		10421.1	21	1.8428					2.49976																	2021-02-04	0.399921	7.77514	5.46291
2022-04-15	7.3545	2.88196		2020-08-06	2.63568		10934.2	22	1.9617					2.6916																	2021-02-05	0.402888	8.17803	5.74598
2022-05-15	7.5782	2.83041		2020-08-07	2.63385		11440.6	23	1.57205					2.37428																	2021-02-06	0.405856	8.58388	6.03114
2022-06-15	7.89841	2.75663		2020-08-08	2.63202		11968.7	24	1.78135					2.78361																	2021-02-07	0.408824	8.9927	6.31839
2022-07-15	8.24869	2.67592		2020-08-09	2.63019		12431.3	25	1.69646					2.31264																	2021-02-08	0.411791	9.4045	6.60772
2022-08-15	8.4948	2.61922		2020-08-10	2.62836		12860.1	26	2.01663					2.73398																	2021-02-09	0.414759	9.81926	6.89913
2022-09-15	8.7689	2.55606		2020-08-11	2.62653																										2021-02-10	0.417727	10.237	7.19263
2022-10-15	9.1588	2.46622		2020-08-12	2.6247		11806.1	21	1.63508		2020-11-14			2.50761																	2021-02-11	0.420694	10.6577	7.48822
2022-11-15	9.52641	2.38152		2020-08-13	2.62288		12270.3	22	1.68651		2021-02-22			3.0119																	2021-02-12	0.423662	11.0813	7.78589
2022-12-15	8.98809	2.50556		2020-08-14	2.62105		12734.1	23	1.61836		2021-03-29			3.03819																	2021-02-13	0.423212	11.5045	8.08324
2023-01-15	8.1748	2.69295		2020-08-15	2.61922		13198.3	24	1.9199		2021-05-10			2.99686																	2021-02-14	0.422763	11.9273	8.38028
				2020-08-16	2.61718		13571.8	25	1.99662		2021-06-18			2.81181																	2021-02-15	0.422313	12.3496	8.677
				2020-08-17	2.61514		14209.9	26	1.89922		2021-07-14			2.82207																	2021-02-16	0.421864	12.7715	8.97341
				2020-08-18	2.6131		14753.1	27	1.86148		2021-08-01			2.80429																	2021-02-17	0.421415	13.1929	9.2695
				2020-08-19	2.61107		15252.9	28	1.99909		2021-08-21			2.68307																	2021-02-18	0.420965	13.6139	9.56527
				2020-08-20	2.60903		15779.3	29	2.00749		2021-09-10			2.77882																	2021-02-19	0.420516	14.0344	9.86073
				2020-08-21	2.60699		16189.2	30	1.43874		2021-11-14			2.49885																	2021-02-20	0.420066	14.4545	10.1559
				2020-08-22	2.60496		16652.5	31	1.84628		2022-02-07			2.83165																	2021-02-21	0.419617	14.8741	10.4507
				2020-08-23	2.60292		17157.5	32	2.02263		2022-07-20			2.72798																	2021-02-22	0.419167	15.2932	10.7452
				2020-08-24	2.60088																										2021-02-23	0.418718	15.712	11.0394
				2020-08-25	2.59884		5872.21	11	0.589396			2020-11-14		2.36193																	2021-02-24	0.418268	16.1302	11.3333
				2020-08-26	2.59681		6253.05	12	1.22554			2021-03-14		2.82131																	2021-02-25	0.417819	16.548	11.6269
				2020-08-27	2.59477		6699.11	13	1.10572			2021-04-13		2.73671																	2021-02-26	0.41737	16.9654	11.9201
				2020-08-28	2.59273		7166.16	14	0.738902			2021-05-13		2.77571																	2021-02-27	0.41692	17.3823	12.213
				2020-08-29	2.59069		7596.26	15	1.11377			2021-06-12		2.75326																	2021-02-28	0.416471	17.7988	12.5057
				2020-08-30	2.58866		7999.81	16	1.0837			2021-07-12		2.67647																	2021-03-01	0.416021	18.2148	12.798
				2020-08-31	2.58662		8320.6	17	1.05362			2021-07-27		2.59967																	2021-03-02	0.415572	18.6304	13.0899
				2020-09-01	2.58458		8815.57	18	1.17342			2021-08-16		2.48224																	2021-03-03	0.415122	19.0455	13.3816
				2020-09-02	2.58254		9220.9	19	1.01267			2021-08-26		2.51551																	2021-03-04	0.414673	19.4602	13.673
				2020-09-03	2.58051		9619.65	20	1.2699			2021-09-05		2.53874																	2021-03-05	0.414223	19.8744	13.964
				2020-09-04	2.57847		10012.4	21	1.52714			2021-09-15		2.56197																	2021-03-06	0.413774	20.2882	14.2547
				2020-09-05	2.57643		10346.1	22	1.59136			2021-09-25		2.46938																	2021-03-07	0.413324	20.7015	14.5451
				2020-09-06	2.5744		10845.6	23	1.60563			2021-10-10		2.55037																	2021-03-08	0.412875	21.1144	14.8352
				2020-09-07	2.57236		11264.2	24	1.48733			2021-10-30		2.42607																	2021-03-09	0.412426	21.5268	15.125
				2020-09-08	2.57032		11596.2	25	1.38609			2021-11-29		2.57139																	2021-03-10	0.411976	21.9388	15.4145
				2020-09-09	2.56828		12025.9	26	1.7256			2021-12-29		2.48605																	2021-03-11	0.411527	22.3503	15.7036
				2020-09-10	2.56625		12446.4	27	1.85326			2022-02-07		2.73026																	2021-03-12	0.411077	22.7614	15.9924
				2020-09-11	2.56421		12828.9	28	1.85361			2022-06-30		2.68675																	2021-03-13	0.410628	23.172	16.2809
				2020-09-12	2.56217																										2021-03-14	0.410178	23.5822	16.5691
				2020-09-13	2.56013																										2021-03-15	0.409729	23.9919	16.857
				2020-09-14	2.5581																										2021-03-16	0.409279	24.4012	17.1446
				2020-09-15	2.55606																										2021-03-17	0.40883	24.81	17.4318
				2020-09-16	2.55307																										2021-03-18	0.408381	25.2184	17.7188
				2020-09-17	2.55007																										2021-03-19	0.407931	25.6263	18.0054
				2020-09-18	2.54708																										2021-03-20	0.407482	26.0338	18.2917
				2020-09-19	2.54408																										2021-03-21	0.407032	26.4409	18.5777
				2020-09-20	2.54109																										2021-03-22	0.406583	26.8474	18.8633
				2020-09-21	2.53809																										2021-03-23	0.406133	27.2536	19.1487
				2020-09-22	2.5351																										2021-03-24	0.405684	27.6593	19.4337
				2020-09-23	2.5321																										2021-03-25	0.405234	28.0645	19.7185
				2020-09-24	2.52911																										2021-03-26	0.404785	28.4693	20.0029
				2020-09-25	2.52611																										2021-03-27	0.404336	28.8736	20.287
				2020-09-26	2.52312																										2021-03-28	0.403886	29.2775	20.5707
				2020-09-27	2.52012																										2021-03-29	0.403437	29.6809	20.8542
				2020-09-28	2.51713																										2021-03-30	0.402987	30.0839	21.1373
				2020-09-29	2.51414																										2021-03-31	0.402538	30.4865	21.4202
				2020-09-30	2.51114																										2021-04-01	0.402088	30.8886	21.7027
				2020-10-01	2.50815																										2021-04-02	0.401639	31.2902	21.9849
				2020-10-02	2.50515																										2021-04-03	0.401189	31.6914	22.2668
				2020-10-03	2.50216																										2021-04-04	0.40074	32.0921	22.5483
				2020-10-04	2.49916																										2021-04-05	0.400291	32.4924	22.8296
				2020-10-05	2.49617																										2021-04-06	0.399841	32.8923	23.1105
				2020-10-06	2.49317																										2021-04-07	0.399392	33.2916	23.3911
				2020-10-07	2.49018																										2021-04-08	0.398942	33.6906	23.6714
				2020-10-08	2.48718																										2021-04-09	0.398493	34.0891	23.9514
				2020-10-09	2.48419																										2021-04-10	0.398043	34.4871	24.2311
				2020-10-10	2.48119										1502																2021-04-11	0.397594	34.8847	24.5104
				2020-10-11	2.4782																										2021-04-12	0.397144	35.2819	24.7895
				2020-10-12	2.47521																										2021-04-13	0.396695	35.6786	25.0682
				2020-10-13	2.47221																										2021-04-14	0.396246	36.0748	25.3466
				2020-10-14	2.46922																										2021-04-15	0.395796	36.4706	25.6247
				2020-10-15	2.46622																										2021-04-16	0.395347	36.8659	25.9025
				2020-10-16	2.46349																										2021-04-17	0.394897	37.2608	26.1799
				2020-10-17	2.46076																										2021-04-18	0.394448	37.6553	26.4571
				2020-10-18	2.45802																										2021-04-19	0.393998	38.0493	26.7339
				2020-10-19	2.45529																										2021-04-20	0.393549	38.4428	27.0104
				2020-10-20	2.45256																										2021-04-21	0.393099	38.8359	27.2866
				2020-10-21	2.44983																										2021-04-22	0.39265	39.2286	27.5625
				2020-10-22	2.44709																										2021-04-23	0.392201	39.6208	27.8381
				2020-10-23	2.44436																										2021-04-24	0.391751	40.0125	28.1133
				2020-10-24	2.44163																										2021-04-25	0.391302	40.4038	28.3882
				2020-10-25	2.4389																										2021-04-26	0.390852	40.7947	28.6629
				2020-10-26	2.43617																										2021-04-27	0.390403	41.1851	28.9372
				2020-10-27	2.43343																										2021-04-28	0.389953	41.575	29.2111
				2020-10-28	2.4307																										2021-04-29	0.389504	41.9646	29.4848
				2020-10-29	2.42797																										2021-04-30	0.389054	42.3536	29.7582
				2020-10-30	2.42524																										2021-05-01	0.388605	42.7422	30.0312
				2020-10-31	2.4225																										2021-05-02	0.388156	43.1304	30.3039
				2020-11-01	2.41977																										2021-05-03	0.387706	43.5181	30.5763
				2020-11-02	2.41704																										2021-05-04	0.388092	43.9062	30.849
				2020-11-03	2.41431																										2021-05-05	0.388478	44.2946	31.122
				2020-11-04	2.41157																										2021-05-06	0.388865	44.6835	31.3952
				2020-11-05	2.40884																										2021-05-07	0.389251	45.0728	31.6687
				2020-11-06	2.40611																										2021-05-08	0.389637	45.4624	31.9424
				2020-11-07	2.40338																										2021-05-09	0.390023	45.8524	32.2165
				2020-11-08	2.40065																										2021-05-10	0.390409	46.2428	32.4908
				2020-11-09	2.39791																										2021-05-11	0.390795	46.6336	32.7654
				2020-11-10	2.39518																										2021-05-12	0.391182	47.0248	33.0402
				2020-11-11	2.39245																										2021-05-13	0.391568	47.4164	33.3153
				2020-11-12	2.38972																										2021-05-14	0.391954	47.8083	33.5907
				2020-11-13	2.38698																										2021-05-15	0.39234	48.2007	33.8664
				2020-11-14	2.38425																										2021-05-16	0.392726	48.5934	34.1423
				2020-11-15	2.38152																										2021-05-17	0.393113	48.9865	34.4185
				2020-11-16	2.38565																										2021-05-18	0.393499	49.38	34.695
				2020-11-17	2.38979																										2021-05-19	0.393885	49.7739	34.9718
				2020-11-18	2.39392																										2021-05-20	0.394271	50.1682	35.2488
				2020-11-19	2.39806																										2021-05-21	0.394657	50.5628	35.5261
				2020-11-20	2.40219																										2021-05-22	0.395043	50.9579	35.8036
				2020-11-21	2.40633																										2021-05-23	0.39543	51.3533	36.0815
				2020-11-22	2.41046																										2021-05-24	0.395816	51.7491	36.3596
				2020-11-23	2.4146																										2021-05-25	0.396202	52.1453	36.6379
				2020-11-24	2.41873																										2021-05-26	0.396588	52.5419	36.9166
				2020-11-25	2.42286																										2021-05-27	0.396974	52.9389	37.1955
				2020-11-26	2.427																										2021-05-28	0.397361	53.3362	37.4747
				2020-11-27	2.43113																										2021-05-29	0.397747	53.734	37.7542
				2020-11-28	2.43527																										2021-05-30	0.398133	54.1321	38.0339
				2020-11-29	2.4394																										2021-05-31	0.398519	54.5306	38.3139
				2020-11-30	2.44354																										2021-06-01	0.398905	54.9295	38.5942
				2020-12-01	2.44767																										2021-06-02	0.399291	55.3288	38.8747
				2020-12-02	2.45181																										2021-06-03	0.399678	55.7285	39.1555
				2020-12-03	2.45594																										2021-06-04	0.400064	56.1286	39.4366
				2020-12-04	2.46008																										2021-06-05	0.40045	56.529	39.718
				2020-12-05	2.46421																										2021-06-06	0.400836	56.9299	39.9996
				2020-12-06	2.46834																										2021-06-07	0.401222	57.3311	40.2815
				2020-12-07	2.47248																										2021-06-08	0.401608	57.7327	40.5637
				2020-12-08	2.47661																										2021-06-09	0.401995	58.1347	40.8462
				2020-12-09	2.48075																										2021-06-10	0.402381	58.5371	41.1289
				2020-12-10	2.48488																										2021-06-11	0.402767	58.9398	41.4119
				2020-12-11	2.48902																										2021-06-12	0.403153	59.343	41.6951
				2020-12-12	2.49315																										2021-06-13	0.403539	59.7465	41.9787
				2020-12-13	2.49729																										2021-06-14	0.403926	60.1504	42.2625
				2020-12-14	2.50142																										2021-06-15	0.404312	60.5548	42.5465
				2020-12-15	2.50556																										2021-06-16	0.404698	60.9595	42.8309
				2020-12-16	2.5116																										2021-06-17	0.405084	61.3645	43.1155
				2020-12-17	2.51765																										2021-06-18	0.40547	61.77	43.4004
				2020-12-18	2.52369																										2021-06-19	0.405856	62.1759	43.6855
				2020-12-19	2.52974																										2021-06-20	0.406243	62.5821	43.971
				2020-12-20	2.53578																										2021-06-21	0.406629	62.9887	44.2567
				2020-12-21	2.54183																										2021-06-22	0.407015	63.3958	44.5426
				2020-12-22	2.54787																										2021-06-23	0.407401	63.8032	44.8289
				2020-12-23	2.55391																										2021-06-24	0.407787	64.2109	45.1154
				2020-12-24	2.55996																										2021-06-25	0.408174	64.6191	45.4022
				2020-12-25	2.566																										2021-06-26	0.40856	65.0277	45.6893
				2020-12-26	2.57205																										2021-06-27	0.408946	65.4366	45.9766
				2020-12-27	2.57809																										2021-06-28	0.409332	65.846	46.2642
				2020-12-28	2.58414																										2021-06-29	0.409718	66.2557	46.5521
				2020-12-29	2.59018																										2021-06-30	0.410104	66.6658	46.8402
				2020-12-30	2.59623																										2021-07-01	0.410491	67.0763	47.1286
				2020-12-31	2.60227																										2021-07-02	0.410877	67.4871	47.4173
				2021-01-01	2.60832																										2021-07-03	0.411263	67.8984	47.7063
				2021-01-02	2.61436																										2021-07-04	0.411649	68.3101	47.9955
				2021-01-03	2.62041																										2021-07-05	0.412035	68.7221	48.285
				2021-01-04	2.62645																										2021-07-06	0.412421	69.1345	48.5748
				2021-01-05	2.6325																										2021-07-07	0.412808	69.5473	48.8648
				2021-01-06	2.63854																										2021-07-08	0.413194	69.9605	49.1551
				2021-01-07	2.64459																										2021-07-09	0.41358	70.3741	49.4457
				2021-01-08	2.65063																										2021-07-10	0.413966	70.7881	49.7366
				2021-01-09	2.65668																										2021-07-11	0.414352	71.2024	50.0277
				2021-01-10	2.66272																										2021-07-12	0.414739	71.6172	50.3191
				2021-01-11	2.66877																										2021-07-13	0.415125	72.0323	50.6108
				2021-01-12	2.67481																										2021-07-14	0.415511	72.4478	50.9027
				2021-01-13	2.68086																										2021-07-15	0.415897	72.8637	51.1949
				2021-01-14	2.6869																										2021-07-16	0.416283	73.28	51.4874
				2021-01-15	2.69295																										2021-07-17	0.416669	73.6966	51.7802
				2021-01-16	2.69665																										2021-07-18	0.417056	74.1137	52.0732
				2021-01-17	2.70034																										2021-07-19	0.417442	74.5311	52.3665
				2021-01-18	2.70404																										2021-07-20	0.417828	74.949	52.6601
				2021-01-19	2.70774																										2021-07-21	0.418214	75.3672	52.9539
				2021-01-20	2.71143																										2021-07-22	0.4186	75.7858	53.248
				2021-01-21	2.71513																										2021-07-23	0.418987	76.2048	53.5424
				2021-01-22	2.71883																										2021-07-24	0.419373	76.6241	53.8371
				2021-01-23	2.72253																										2021-07-25	0.419759	77.0439	54.132
				2021-01-24	2.72622																										2021-07-26	0.420145	77.464	54.4272
				2021-01-25	2.72992																										2021-07-27	0.420531	77.8846	54.7227
				2021-01-26	2.73362																										2021-07-28	0.420917	78.3055	55.0184
				2021-01-27	2.73731																										2021-07-29	0.421304	78.7268	55.3144
				2021-01-28	2.74101																										2021-07-30	0.42169	79.1485	55.6107
				2021-01-29	2.74471																										2021-07-31	0.422076	79.5706	55.9073
				2021-01-30	2.7484																										2021-08-01	0.422462	79.993	56.2041
				2021-01-31	2.7521																										2021-08-02	0.424965	80.418	56.5027
				2021-02-01	2.7558																										2021-08-03	0.427468	80.8455	56.803
				2021-02-02	2.7595																										2021-08-04	0.429971	81.2754	57.1051
				2021-02-03	2.76319																										2021-08-05	0.432474	81.7079	57.409
				2021-02-04	2.76689																										2021-08-06	0.434977	82.1429	57.7146
				2021-02-05	2.77059																										2021-08-07	0.437481	82.5804	58.022
				2021-02-06	2.77428																										2021-08-08	0.439984	83.0203	58.3311
				2021-02-07	2.77798																										2021-08-09	0.442487	83.4628	58.642
				2021-02-08	2.78168																										2021-08-10	0.44499	83.9078	58.9547
				2021-02-09	2.78538																										2021-08-11	0.447493	84.3553	59.2691
				2021-02-10	2.78907																										2021-08-12	0.449996	84.8053	59.5853
				2021-02-11	2.79277																										2021-08-13	0.452499	85.2578	59.9032
				2021-02-12	2.79647																										2021-08-14	0.455002	85.7128	60.2229
				2021-02-13	2.80016																										2021-08-15	0.457505	86.1703	60.5443
				2021-02-14	2.80386																										2021-08-16	0.460008	86.6303	60.8675
				2021-02-15	2.80756																										2021-08-17	0.462511	87.0928	61.1925
				2021-02-16	2.81012																										2021-08-18	0.465014	87.5578	61.5192
				2021-02-17	2.81269																										2021-08-19	0.467517	88.0254	61.8477
				2021-02-18	2.81525																										2021-08-20	0.47002	88.4954	62.178
				2021-02-19	2.81781																										2021-08-21	0.472524	88.9679	62.51
				2021-02-20	2.82038																										2021-08-22	0.475027	89.4429	62.8437
				2021-02-21	2.82294																										2021-08-23	0.47753	89.9205	63.1792
				2021-02-22	2.82551																										2021-08-24	0.480033	90.4005	63.5165
				2021-02-23	2.82807																										2021-08-25	0.482536	90.883	63.8556
				2021-02-24	2.83064																										2021-08-26	0.485039	91.3681	64.1963
				2021-02-25	2.8332																										2021-08-27	0.487542	91.8556	64.5389
				2021-02-26	2.83576																										2021-08-28	0.490045	92.3457	64.8832
				2021-02-27	2.83833																										2021-08-29	0.492548	92.8382	65.2293
				2021-02-28	2.84089																										2021-08-30	0.495051	93.3333	65.5771
				2021-03-01	2.84346																										2021-08-31	0.497554	93.8308	65.9267
				2021-03-02	2.84602																										2021-09-01	0.495151	94.326	66.2746
				2021-03-03	2.84859																										2021-09-02	0.492748	94.8187	66.6208
				2021-03-04	2.85115																										2021-09-03	0.490346	95.3091	66.9653
				2021-03-05	2.85371																										2021-09-04	0.487943	95.797	67.3082
				2021-03-06	2.85628																										2021-09-05	0.48554	96.2825	67.6493
				2021-03-07	2.85884																										2021-09-06	0.483137	96.7657	67.9888
				2021-03-08	2.86141																										2021-09-07	0.480734	97.2464	68.3265
				2021-03-09	2.86397																										2021-09-08	0.478331	97.7247	68.6626
				2021-03-10	2.86654																										2021-09-09	0.475928	98.2007	68.997
				2021-03-11	2.8691																										2021-09-10	0.473525	98.6742	69.3297
				2021-03-12	2.87166																										2021-09-11	0.471122	99.1453	69.6607
				2021-03-13	2.87423																										2021-09-12	0.468719	99.614	69.9901
				2021-03-14	2.87679																										2021-09-13	0.466316	100.08	70.3177
				2021-03-15	2.87936																										2021-09-14	0.463913	100.544	70.6437
				2021-03-16	2.87944																										2021-09-15	0.461511	101.006	70.9679
				2021-03-17	2.87952																										2021-09-16	0.459108	101.465	71.2905
				2021-03-18	2.87961																										2021-09-17	0.456705	101.922	71.6114
				2021-03-19	2.87969																										2021-09-18	0.454302	102.376	71.9306
				2021-03-20	2.87978																										2021-09-19	0.451899	102.828	72.2481
				2021-03-21	2.87986																										2021-09-20	0.449496	103.277	72.5639
				2021-03-22	2.87994																										2021-09-21	0.447093	103.724	72.878
				2021-03-23	2.88003																										2021-09-22	0.44469	104.169	73.1905
				2021-03-24	2.88011																										2021-09-23	0.442287	104.611	73.5012
				2021-03-25	2.8802																										2021-09-24	0.439884	105.051	73.8103
				2021-03-26	2.88028																										2021-09-25	0.437481	105.489	74.1177
				2021-03-27	2.88036																										2021-09-26	0.435079	105.924	74.4234
				2021-03-28	2.88045																										2021-09-27	0.432676	106.356	74.7274
				2021-03-29	2.88053																										2021-09-28	0.430273	106.787	75.0297
				2021-03-30	2.88062																										2021-09-29	0.42787	107.215	75.3303
				2021-03-31	2.8807																										2021-09-30	0.425467	107.64	75.6293
				2021-04-01	2.88078																										2021-10-01	0.422427	108.063	75.9261
				2021-04-02	2.88087																										2021-10-02	0.419386	108.482	76.2207
				2021-04-03	2.88095																										2021-10-03	0.416346	108.898	76.5133
				2021-04-04	2.88104																										2021-10-04	0.413306	109.312	76.8037
				2021-04-05	2.88112																										2021-10-05	0.410266	109.722	77.0919
				2021-04-06	2.8812																										2021-10-06	0.407225	110.129	77.378
				2021-04-07	2.88129																										2021-10-07	0.404185	110.533	77.662
				2021-04-08	2.88137																										2021-10-08	0.401145	110.934	77.9439
				2021-04-09	2.88146																										2021-10-09	0.398104	111.332	78.2236
				2021-04-10	2.88154																										2021-10-10	0.395064	111.728	78.5012
				2021-04-11	2.88162																										2021-10-11	0.392024	112.12	78.7766
				2021-04-12	2.88171																										2021-10-12	0.388984	112.509	79.0499
				2021-04-13	2.88179																										2021-10-13	0.385943	112.894	79.3211
				2021-04-14	2.88187																										2021-10-14	0.382903	113.277	79.5901
				2021-04-15	2.88196																										2021-10-15	0.379863	113.657	79.857
				2021-04-16	2.88024																										2021-10-16	0.376823	114.034	80.1218
				2021-04-17	2.87852																										2021-10-17	0.373782	114.408	80.3844
				2021-04-18	2.8768																										2021-10-18	0.370742	114.779	80.6449
				2021-04-19	2.87509																										2021-10-19	0.367702	115.146	80.9032
				2021-04-20	2.87337																										2021-10-20	0.364662	115.511	81.1594
				2021-04-21	2.87165																										2021-10-21	0.361621	115.873	81.4135
				2021-04-22	2.86993																										2021-10-22	0.358581	116.231	81.6655
				2021-04-23	2.86821																										2021-10-23	0.355541	116.587	81.9153
				2021-04-24	2.8665																										2021-10-24	0.3525	116.939	82.1629
				2021-04-25	2.86478																										2021-10-25	0.34946	117.289	82.4085
				2021-04-26	2.86306																										2021-10-26	0.34642	117.635	82.6519
				2021-04-27	2.86134																										2021-10-27	0.34338	117.978	82.8931
				2021-04-28	2.85962																										2021-10-28	0.340339	118.319	83.1323
				2021-04-29	2.8579																										2021-10-29	0.337299	118.656	83.3693
				2021-04-30	2.85619																										2021-10-30	0.334259	118.99	83.6041
				2021-05-01	2.85447																										2021-10-31	0.331219	119.322	83.8368
				2021-05-02	2.85275																										2021-11-01	0.328178	119.65	84.0674
				2021-05-03	2.85103																										2021-11-02	0.325138	119.975	84.2959
				2021-05-04	2.84931																										2021-11-03	0.322098	120.297	84.5222
				2021-05-05	2.8476																										2021-11-04	0.319058	120.616	84.7463
				2021-05-06	2.84588																										2021-11-05	0.316017	120.932	84.9684
				2021-05-07	2.84416																										2021-11-06	0.312977	121.245	85.1883
				2021-05-08	2.84244																										2021-11-07	0.309937	121.555	85.4061
				2021-05-09	2.84072																										2021-11-08	0.306897	121.862	85.6217
				2021-05-10	2.83901																										2021-11-09	0.303856	122.166	85.8352
				2021-05-11	2.83729																										2021-11-10	0.303904	122.47	86.0487
				2021-05-12	2.83557																										2021-11-11	0.303952	122.774	86.2623
				2021-05-13	2.83385																										2021-11-12	0.304	123.078	86.4759
				2021-05-14	2.83213																										2021-11-13	0.304047	123.382	86.6895
				2021-05-15	2.83041																										2021-11-14	0.304095	123.686	86.9031
				2021-05-16	2.82803																										2021-11-15	0.304143	123.99	87.1168
				2021-05-17	2.82565																										2021-11-16	0.304191	124.294	87.3306
				2021-05-18	2.82327																										2021-11-17	0.304239	124.598	87.5443
				2021-05-19	2.82089																										2021-11-18	0.304287	124.903	87.7581
				2021-05-20	2.81851																										2021-11-19	0.304334	125.207	87.972
				2021-05-21	2.81613																										2021-11-20	0.304382	125.511	88.1858
				2021-05-22	2.81375																										2021-11-21	0.30443	125.816	88.3997
				2021-05-23	2.81137																										2021-11-22	0.304478	126.12	88.6136
				2021-05-24	2.80899																										2021-11-23	0.304526	126.425	88.8276
				2021-05-25	2.80661																										2021-11-24	0.304573	126.729	89.0416
				2021-05-26	2.80423																										2021-11-25	0.304621	127.034	89.2556
				2021-05-27	2.80185																										2021-11-26	0.304669	127.339	89.4697
				2021-05-28	2.79947																										2021-11-27	0.304717	127.643	89.6838
				2021-05-29	2.79709																										2021-11-28	0.304765	127.948	89.8979
				2021-05-30	2.79471																										2021-11-29	0.304812	128.253	90.1121
				2021-05-31	2.79233																										2021-11-30	0.30486	128.558	90.3263
				2021-06-01	2.78995																										2021-12-01	0.304908	128.863	90.5405
				2021-06-02	2.78757																										2021-12-02	0.304956	129.168	90.7548
				2021-06-03	2.78519																										2021-12-03	0.305004	129.473	90.9691
				2021-06-04	2.78281																										2021-12-04	0.305052	129.778	91.1834
				2021-06-05	2.78043																										2021-12-05	0.305099	130.083	91.3978
				2021-06-06	2.77805																										2021-12-06	0.305147	130.388	91.6122
				2021-06-07	2.77567																										2021-12-07	0.305195	130.693	91.8266
				2021-06-08	2.77329																										2021-12-08	0.305243	130.998	92.0411
				2021-06-09	2.77091																										2021-12-09	0.305291	131.304	92.2556
				2021-06-10	2.76853																										2021-12-10	0.305338	131.609	92.4701
				2021-06-11	2.76615																										2021-12-11	0.305386	131.914	92.6847
				2021-06-12	2.76377																										2021-12-12	0.305434	132.22	92.8993
				2021-06-13	2.76139																										2021-12-13	0.305482	132.525	93.1139
				2021-06-14	2.75901																										2021-12-14	0.30553	132.831	93.3286
				2021-06-15	2.75663																										2021-12-15	0.305577	133.136	93.5433
				2021-06-16	2.75394																										2021-12-16	0.305625	133.442	93.758
				2021-06-17	2.75125																										2021-12-17	0.305673	133.748	93.9728
				2021-06-18	2.74856																										2021-12-18	0.305721	134.053	94.1876
				2021-06-19	2.74587																										2021-12-19	0.305769	134.359	94.4024
				2021-06-20	2.74318																										2021-12-20	0.305817	134.665	94.6173
				2021-06-21	2.74049																										2021-12-21	0.305864	134.971	94.8322
				2021-06-22	2.7378																										2021-12-22	0.305912	135.277	95.0472
				2021-06-23	2.73511																										2021-12-23	0.30596	135.583	95.2621
				2021-06-24	2.73242																										2021-12-24	0.306008	135.889	95.4771
				2021-06-25	2.72973																										2021-12-25	0.306056	136.195	95.6922
				2021-06-26	2.72704																										2021-12-26	0.306103	136.501	95.9072
				2021-06-27	2.72435																										2021-12-27	0.306151	136.807	96.1224
				2021-06-28	2.72166																										2021-12-28	0.306199	137.113	96.3375
				2021-06-29	2.71897																										2021-12-29	0.306247	137.42	96.5527
				2021-06-30	2.71628																										2021-12-30	0.306295	137.726	96.7679
				2021-07-01	2.71359																										2021-12-31	0.306342	138.032	96.9831
				2021-07-02	2.7109																										2022-01-01	0.30639	138.339	97.1984
				2021-07-03	2.70821																										2022-01-02	0.306438	138.645	97.4137
				2021-07-04	2.70552																										2022-01-03	0.306486	138.951	97.629
				2021-07-05	2.70283																										2022-01-04	0.306534	139.258	97.8444
				2021-07-06	2.70014																										2022-01-05	0.306581	139.565	98.0598
				2021-07-07	2.69745																										2022-01-06	0.306629	139.871	98.2753
				2021-07-08	2.69476																										2022-01-07	0.306677	140.178	98.4907
				2021-07-09	2.69207																										2022-01-08	0.306725	140.485	98.7062
				2021-07-10	2.68938																										2022-01-09	0.306773	140.791	98.9218
				2021-07-11	2.68669																										2022-01-10	0.306821	141.098	99.1374
				2021-07-12	2.68399																										2022-01-11	0.306868	141.405	99.353
				2021-07-13	2.6813																										2022-01-12	0.306916	141.712	99.5686
				2021-07-14	2.67861																										2022-01-13	0.306964	142.019	99.7843
				2021-07-15	2.67592																										2022-01-14	0.307012	142.326	100
				2021-07-16	2.67409
				2021-07-17	2.67227
				2021-07-18	2.67044
				2021-07-19	2.66861
				2021-07-20	2.66678
				2021-07-21	2.66495
				2021-07-22	2.66312
				2021-07-23	2.66129
				2021-07-24	2.65946
				2021-07-25	2.65763
				2021-07-26	2.6558
				2021-07-27	2.65397
				2021-07-28	2.65214
				2021-07-29	2.65031
				2021-07-30	2.64848
				2021-07-31	2.64666
				2021-08-01	2.64483
				2021-08-02	2.643
				2021-08-03	2.64117
				2021-08-04	2.63934
				2021-08-05	2.63751
				2021-08-06	2.63568
				2021-08-07	2.63385
				2021-08-08	2.63202
				2021-08-09	2.63019
				2021-08-10	2.62836
				2021-08-11	2.62653
				2021-08-12	2.6247
				2021-08-13	2.62288
				2021-08-14	2.62105
				2021-08-15	2.61922
				2021-08-16	2.61718
				2021-08-17	2.61514
				2021-08-18	2.6131
				2021-08-19	2.61107
				2021-08-20	2.60903
				2021-08-21	2.60699
				2021-08-22	2.60496
				2021-08-23	2.60292
				2021-08-24	2.60088
				2021-08-25	2.59884
				2021-08-26	2.59681
				2021-08-27	2.59477
				2021-08-28	2.59273
				2021-08-29	2.59069
				2021-08-30	2.58866
				2021-08-31	2.58662
				2021-09-01	2.58458
				2021-09-02	2.58254
				2021-09-03	2.58051
				2021-09-04	2.57847
				2021-09-05	2.57643
				2021-09-06	2.5744
				2021-09-07	2.57236
				2021-09-08	2.57032
				2021-09-09	2.56828
				2021-09-10	2.56625
				2021-09-11	2.56421
				2021-09-12	2.56217
				2021-09-13	2.56013
				2021-09-14	2.5581
				2021-09-15	2.55606
				2021-09-16	2.55307
				2021-09-17	2.55007
				2021-09-18	2.54708
				2021-09-19	2.54408
				2021-09-20	2.54109
				2021-09-21	2.53809
				2021-09-22	2.5351
				2021-09-23	2.5321
				2021-09-24	2.52911
				2021-09-25	2.52611
				2021-09-26	2.52312
				2021-09-27	2.52012
				2021-09-28	2.51713
				2021-09-29	2.51414
				2021-09-30	2.51114
				2021-10-01	2.50815
				2021-10-02	2.50515
				2021-10-03	2.50216
				2021-10-04	2.49916
				2021-10-05	2.49617
				2021-10-06	2.49317
				2021-10-07	2.49018
				2021-10-08	2.48718
				2021-10-09	2.48419
				2021-10-10	2.48119
				2021-10-11	2.4782
				2021-10-12	2.47521
				2021-10-13	2.47221
				2021-10-14	2.46922
				2021-10-15	2.46622
				2021-10-16	2.46349
				2021-10-17	2.46076
				2021-10-18	2.45802
				2021-10-19	2.45529
				2021-10-20	2.45256
				2021-10-21	2.44983
				2021-10-22	2.44709
				2021-10-23	2.44436
				2021-10-24	2.44163
				2021-10-25	2.4389
				2021-10-26	2.43617
				2021-10-27	2.43343
				2021-10-28	2.4307
				2021-10-29	2.42797
				2021-10-30	2.42524
				2021-10-31	2.4225
				2021-11-01	2.41977
				2021-11-02	2.41704
				2021-11-03	2.41431
				2021-11-04	2.41157
				2021-11-05	2.40884
				2021-11-06	2.40611
				2021-11-07	2.40338
				2021-11-08	2.40065
				2021-11-09	2.39791
				2021-11-10	2.39518
				2021-11-11	2.39245
				2021-11-12	2.38972
				2021-11-13	2.38698
				2021-11-14	2.38425
				2021-11-15	2.38152
				2021-11-16	2.38565
				2021-11-17	2.38979
				2021-11-18	2.39392
				2021-11-19	2.39806
				2021-11-20	2.40219
				2021-11-21	2.40633
				2021-11-22	2.41046
				2021-11-23	2.4146
				2021-11-24	2.41873
				2021-11-25	2.42286
				2021-11-26	2.427
				2021-11-27	2.43113
				2021-11-28	2.43527
				2021-11-29	2.4394
				2021-11-30	2.44354
				2021-12-01	2.44767
				2021-12-02	2.45181
				2021-12-03	2.45594
				2021-12-04	2.46008
				2021-12-05	2.46421
				2021-12-06	2.46834
				2021-12-07	2.47248
				2021-12-08	2.47661
				2021-12-09	2.48075
				2021-12-10	2.48488
				2021-12-11	2.48902
				2021-12-12	2.49315
				2021-12-13	2.49729
				2021-12-14	2.50142
				2021-12-15	2.50556
				2021-12-16	2.5116
				2021-12-17	2.51765
				2021-12-18	2.52369
				2021-12-19	2.52974
				2021-12-20	2.53578
				2021-12-21	2.54183
				2021-12-22	2.54787
				2021-12-23	2.55391
				2021-12-24	2.55996
				2021-12-25	2.566
				2021-12-26	2.57205
				2021-12-27	2.57809
				2021-12-28	2.58414
				2021-12-29	2.59018
				2021-12-30	2.59623
				2021-12-31	2.60227
				2022-01-01	2.60832
				2022-01-02	2.61436
				2022-01-03	2.62041
				2022-01-04	2.62645
				2022-01-05	2.6325
				2022-01-06	2.63854
				2022-01-07	2.64459
				2022-01-08	2.65063
				2022-01-09	2.65668
				2022-01-10	2.66272
				2022-01-11	2.66877
				2022-01-12	2.67481
				2022-01-13	2.68086
				2022-01-14	2.6869
				2022-01-15	2.69295
				2022-01-16	2.69665
				2022-01-17	2.70034
				2022-01-18	2.70404
				2022-01-19	2.70774
				2022-01-20	2.71143
				2022-01-21	2.71513
				2022-01-22	2.71883
				2022-01-23	2.72253
				2022-01-24	2.72622
				2022-01-25	2.72992
				2022-01-26	2.73362
				2022-01-27	2.73731
				2022-01-28	2.74101
				2022-01-29	2.74471
				2022-01-30	2.7484
				2022-01-31	2.7521
				2022-02-01	2.7558
				2022-02-02	2.7595
				2022-02-03	2.76319
				2022-02-04	2.76689
				2022-02-05	2.77059
				2022-02-06	2.77428
				2022-02-07	2.77798
				2022-02-08	2.78168
				2022-02-09	2.78538
				2022-02-10	2.78907
				2022-02-11	2.79277
				2022-02-12	2.79647
				2022-02-13	2.80016
				2022-02-14	2.80386
				2022-02-15	2.80756
				2022-02-16	2.81012
				2022-02-17	2.81269
				2022-02-18	2.81525
				2022-02-19	2.81781
				2022-02-20	2.82038
				2022-02-21	2.82294
				2022-02-22	2.82551
				2022-02-23	2.82807
				2022-02-24	2.83064
				2022-02-25	2.8332
				2022-02-26	2.83576
				2022-02-27	2.83833
				2022-02-28	2.84089
				2022-03-01	2.84346
				2022-03-02	2.84602
				2022-03-03	2.84859
				2022-03-04	2.85115
				2022-03-05	2.85371
				2022-03-06	2.85628
				2022-03-07	2.85884
				2022-03-08	2.86141
				2022-03-09	2.86397
				2022-03-10	2.86654
				2022-03-11	2.8691
				2022-03-12	2.87166
				2022-03-13	2.87423
				2022-03-14	2.87679
				2022-03-15	2.87936
				2022-03-16	2.87944
				2022-03-17	2.87952
				2022-03-18	2.87961
				2022-03-19	2.87969
				2022-03-20	2.87978
				2022-03-21	2.87986
				2022-03-22	2.87994
				2022-03-23	2.88003
				2022-03-24	2.88011
				2022-03-25	2.8802
				2022-03-26	2.88028
				2022-03-27	2.88036
				2022-03-28	2.88045
				2022-03-29	2.88053
				2022-03-30	2.88062
				2022-03-31	2.8807
				2022-04-01	2.88078
				2022-04-02	2.88087
				2022-04-03	2.88095
				2022-04-04	2.88104
				2022-04-05	2.88112
				2022-04-06	2.8812
				2022-04-07	2.88129
				2022-04-08	2.88137
				2022-04-09	2.88146
				2022-04-10	2.88154
				2022-04-11	2.88162
				2022-04-12	2.88171
				2022-04-13	2.88179
				2022-04-14	2.88187
				2022-04-15	2.88196
				2022-04-16	2.88024
				2022-04-17	2.87852
				2022-04-18	2.8768
				2022-04-19	2.87509
				2022-04-20	2.87337
				2022-04-21	2.87165
				2022-04-22	2.86993
				2022-04-23	2.86821
				2022-04-24	2.8665
				2022-04-25	2.86478
				2022-04-26	2.86306
				2022-04-27	2.86134
				2022-04-28	2.85962
				2022-04-29	2.8579
				2022-04-30	2.85619
				2022-05-01	2.85447
				2022-05-02	2.85275
				2022-05-03	2.85103
				2022-05-04	2.84931
				2022-05-05	2.8476
				2022-05-06	2.84588
				2022-05-07	2.84416
				2022-05-08	2.84244
				2022-05-09	2.84072
				2022-05-10	2.83901
				2022-05-11	2.83729
				2022-05-12	2.83557
				2022-05-13	2.83385
				2022-05-14	2.83213
				2022-05-15	2.83041
				2022-05-16	2.82803
				2022-05-17	2.82565
				2022-05-18	2.82327
				2022-05-19	2.82089
				2022-05-20	2.81851
				2022-05-21	2.81613
				2022-05-22	2.81375
				2022-05-23	2.81137
				2022-05-24	2.80899
				2022-05-25	2.80661
				2022-05-26	2.80423
				2022-05-27	2.80185
				2022-05-28	2.79947
				2022-05-29	2.79709
				2022-05-30	2.79471
				2022-05-31	2.79233
				2022-06-01	2.78995
				2022-06-02	2.78757
				2022-06-03	2.78519
				2022-06-04	2.78281
				2022-06-05	2.78043
				2022-06-06	2.77805
				2022-06-07	2.77567
				2022-06-08	2.77329
				2022-06-09	2.77091
				2022-06-10	2.76853
				2022-06-11	2.76615
				2022-06-12	2.76377
				2022-06-13	2.76139
				2022-06-14	2.75901
				2022-06-15	2.75663
				2022-06-16	2.75394
				2022-06-17	2.75125
				2022-06-18	2.74856
				2022-06-19	2.74587
				2022-06-20	2.74318
				2022-06-21	2.74049
				2022-06-22	2.7378
				2022-06-23	2.73511
				2022-06-24	2.73242
				2022-06-25	2.72973
				2022-06-26	2.72704
				2022-06-27	2.72435
				2022-06-28	2.72166
				2022-06-29	2.71897
				2022-06-30	2.71628
				2022-07-01	2.71359
				2022-07-02	2.7109
				2022-07-03	2.70821
				2022-07-04	2.70552
				2022-07-05	2.70283
				2022-07-06	2.70014
				2022-07-07	2.69745
				2022-07-08	2.69476
				2022-07-09	2.69207
				2022-07-10	2.68938
				2022-07-11	2.68669
				2022-07-12	2.68399
				2022-07-13	2.6813
				2022-07-14	2.67861
				2022-07-15	2.67592

## Sheet: Viking Bank seasonal growth mod
	Growth curves (daily growth% of annual increment			AVERAGE			Cumulative seasonal growth curves			AVERAGE
Date						Date	MOL8216_08VN16-A1L	MOL8216_08VN16-A1L	MOL8216_08VN16-A1L
2021-01-15	0.340568	0.226364	0.209338	0.258757		2021-01-15	0.239288	0.215054	0.12974	0.194694
2021-01-16	0.343536	0.228317	0.211476	0.26111		2021-01-16	0.48066	0.431964	0.260805	0.391143
2021-01-17	0.346504	0.230271	0.213614	0.263463		2021-01-17	0.724118	0.65073	0.393195	0.589348
2021-01-18	0.349471	0.232224	0.215753	0.265816		2021-01-18	0.969661	0.871351	0.52691	0.789307
2021-01-19	0.352439	0.234177	0.217891	0.268169		2021-01-19	1.21729	1.09383	0.661951	0.991023
2021-01-20	0.355407	0.23613	0.220029	0.270522		2021-01-20	1.467	1.31816	0.798317	1.19449
2021-01-21	0.358374	0.238084	0.222167	0.272875		2021-01-21	1.7188	1.54435	0.936008	1.39972
2021-01-22	0.361342	0.240037	0.224306	0.275228		2021-01-22	1.97268	1.77239	1.07502	1.6067
2021-01-23	0.364309	0.24199	0.226444	0.277581		2021-01-23	2.22865	2.00229	1.21537	1.81544
2021-01-24	0.367277	0.243943	0.228582	0.279934		2021-01-24	2.48671	2.23405	1.35703	2.02593
2021-01-25	0.370245	0.245896	0.23072	0.282287		2021-01-25	2.74684	2.46766	1.50002	2.23817
2021-01-26	0.373212	0.24785	0.232859	0.28464		2021-01-26	3.00907	2.70312	1.64434	2.45218
2021-01-27	0.37618	0.249803	0.234997	0.286993		2021-01-27	3.27338	2.94044	1.78998	2.66793
2021-01-28	0.379147	0.251756	0.237135	0.289346		2021-01-28	3.53977	3.17962	1.93695	2.88545
2021-01-29	0.382115	0.253709	0.239274	0.291699		2021-01-29	3.80825	3.42065	2.08524	3.10472
2021-01-30	0.385083	0.255662	0.241412	0.294052		2021-01-30	4.07881	3.66354	2.23486	3.32574
2021-01-31	0.38805	0.257616	0.24355	0.296405		2021-01-31	4.35146	3.90829	2.3858	3.54852
2021-02-01	0.391018	0.259569	0.245688	0.298758		2021-02-01	4.6262	4.15489	2.53807	3.77305
2021-02-02	0.393986	0.261522	0.247827	0.301111		2021-02-02	4.90301	4.40334	2.69167	3.99934
2021-02-03	0.396953	0.263475	0.249965	0.303464		2021-02-03	5.18192	4.65365	2.84659	4.22739
2021-02-04	0.399921	0.265428	0.252103	0.305817		2021-02-04	5.46291	4.90582	3.00283	4.45719
2021-02-05	0.402888	0.267382	0.254241	0.30817		2021-02-05	5.74598	5.15984	3.1604	4.68874
2021-02-06	0.405856	0.269335	0.25638	0.310523		2021-02-06	6.03114	5.41572	3.31929	4.92205
2021-02-07	0.408824	0.271288	0.258518	0.312876		2021-02-07	6.31839	5.67345	3.47951	5.15712
2021-02-08	0.411791	0.273241	0.260656	0.31523		2021-02-08	6.60772	5.93304	3.64106	5.39394
2021-02-09	0.414759	0.275194	0.262794	0.317583		2021-02-09	6.89913	6.19449	3.80393	5.63252
2021-02-10	0.417727	0.277148	0.264933	0.319936		2021-02-10	7.19263	6.45779	3.96812	5.87285
2021-02-11	0.420694	0.279101	0.267071	0.322289		2021-02-11	7.48822	6.72294	4.13364	6.11493
2021-02-12	0.423662	0.281054	0.269209	0.324642		2021-02-12	7.78589	6.98996	4.30049	6.35878
2021-02-13	0.423212	0.283007	0.271347	0.325856		2021-02-13	8.08324	7.25882	4.46866	6.60357
2021-02-14	0.422763	0.28496	0.273486	0.32707		2021-02-14	8.38028	7.52955	4.63816	6.84933
2021-02-15	0.422313	0.286914	0.275624	0.328284		2021-02-15	8.677	7.80212	4.80898	7.09603
2021-02-16	0.421864	0.288867	0.277762	0.329498		2021-02-16	8.97341	8.07656	4.98112	7.3437
2021-02-17	0.421415	0.29082	0.2799	0.330712		2021-02-17	9.2695	8.35285	5.15459	7.59231
2021-02-18	0.420965	0.292773	0.282039	0.331926		2021-02-18	9.56527	8.63099	5.32939	7.84189
2021-02-19	0.420516	0.294726	0.284177	0.33314		2021-02-19	9.86073	8.91099	5.50551	8.09241
2021-02-20	0.420066	0.29668	0.286315	0.334354		2021-02-20	10.1559	9.19285	5.68296	8.3439
2021-02-21	0.419617	0.298633	0.288453	0.335568		2021-02-21	10.4507	9.47656	5.86173	8.59633
2021-02-22	0.419167	0.300586	0.290592	0.336782		2021-02-22	10.7452	9.76213	6.04183	8.84973
2021-02-23	0.418718	0.299155	0.29273	0.336868		2021-02-23	11.0394	10.0463	6.22325	9.103
2021-02-24	0.418268	0.297723	0.294868	0.336953		2021-02-24	11.3333	10.3292	6.406	9.35616
2021-02-25	0.417819	0.296292	0.297006	0.337039		2021-02-25	11.6269	10.6107	6.59008	9.6092
2021-02-26	0.41737	0.294861	0.299145	0.337125		2021-02-26	11.9201	10.8908	6.77547	9.86213
2021-02-27	0.41692	0.293429	0.301283	0.337211		2021-02-27	12.213	11.1696	6.9622	10.1149
2021-02-28	0.416471	0.291998	0.303421	0.337297		2021-02-28	12.5057	11.447	7.15025	10.3676
2021-03-01	0.416021	0.290567	0.305559	0.337382		2021-03-01	12.798	11.723	7.33962	10.6202
2021-03-02	0.415572	0.289135	0.307698	0.337468		2021-03-02	13.0899	11.9977	7.53032	10.8727
2021-03-03	0.415122	0.287704	0.309836	0.337554		2021-03-03	13.3816	12.271	7.72235	11.125
2021-03-04	0.414673	0.286272	0.311974	0.33764		2021-03-04	13.673	12.543	7.9157	11.3772
2021-03-05	0.414223	0.284841	0.314112	0.337726		2021-03-05	13.964	12.8136	8.11037	11.6293
2021-03-06	0.413774	0.28341	0.316251	0.337811		2021-03-06	14.2547	13.0829	8.30637	11.8813
2021-03-07	0.413324	0.281978	0.318389	0.337897		2021-03-07	14.5451	13.3508	8.5037	12.1332
2021-03-08	0.412875	0.280547	0.320527	0.337983		2021-03-08	14.8352	13.6173	8.70235	12.385
2021-03-09	0.412426	0.279116	0.322666	0.338069		2021-03-09	15.125	13.8825	8.90232	12.6366
2021-03-10	0.411976	0.277684	0.324804	0.338155		2021-03-10	15.4145	14.1463	9.10362	12.8881
2021-03-11	0.411527	0.276253	0.326942	0.338241		2021-03-11	15.7036	14.4087	9.30625	13.1395
2021-03-12	0.411077	0.274822	0.32908	0.338326		2021-03-12	15.9924	14.6698	9.5102	13.3908
2021-03-13	0.410628	0.27339	0.331219	0.338412		2021-03-13	16.2809	14.9295	9.71548	13.642
2021-03-14	0.410178	0.271959	0.333357	0.338498		2021-03-14	16.5691	15.1879	9.92208	13.893
2021-03-15	0.409729	0.270527	0.334515	0.338257		2021-03-15	16.857	15.4449	10.1294	14.1438
2021-03-16	0.409279	0.269096	0.335674	0.338016		2021-03-16	17.1446	15.7006	10.3374	14.3942
2021-03-17	0.40883	0.267665	0.336832	0.337776		2021-03-17	17.4318	15.9549	10.5462	14.6443
2021-03-18	0.408381	0.266233	0.33799	0.337535		2021-03-18	17.7188	16.2078	10.7557	14.8941
2021-03-19	0.407931	0.264802	0.339149	0.337294		2021-03-19	18.0054	16.4594	10.9659	15.1435
2021-03-20	0.407482	0.263371	0.340307	0.337053		2021-03-20	18.2917	16.7096	11.1768	15.3927
2021-03-21	0.407032	0.261939	0.341465	0.336812		2021-03-21	18.5777	16.9584	11.3884	15.6415
2021-03-22	0.406583	0.260508	0.342624	0.336572		2021-03-22	18.8633	17.2059	11.6007	15.89
2021-03-23	0.406133	0.259077	0.343782	0.336331		2021-03-23	19.1487	17.4521	11.8138	16.1382
2021-03-24	0.405684	0.257645	0.344941	0.33609		2021-03-24	19.4337	17.6968	12.0276	16.3861
2021-03-25	0.405234	0.256214	0.346099	0.335849		2021-03-25	19.7185	17.9402	12.2421	16.6336
2021-03-26	0.404785	0.254782	0.347257	0.335608		2021-03-26	20.0029	18.1823	12.4573	16.8808
2021-03-27	0.404336	0.253351	0.348416	0.335367		2021-03-27	20.287	18.423	12.6732	17.1277
2021-03-28	0.403886	0.25192	0.349574	0.335127		2021-03-28	20.5707	18.6623	12.8899	17.3743
2021-03-29	0.403437	0.250488	0.350733	0.334886		2021-03-29	20.8542	18.9003	13.1073	17.6206
2021-03-30	0.402987	0.250322	0.351891	0.335067		2021-03-30	21.1373	19.1381	13.3253	17.8669
2021-03-31	0.402538	0.250156	0.353049	0.335248		2021-03-31	21.4202	19.3758	13.5442	18.1134
2021-04-01	0.402088	0.24999	0.354208	0.335429		2021-04-01	21.7027	19.6133	13.7637	18.3599
2021-04-02	0.401639	0.249824	0.355366	0.33561		2021-04-02	21.9849	19.8506	13.9839	18.6065
2021-04-03	0.401189	0.249657	0.356524	0.33579		2021-04-03	22.2668	20.0878	14.2049	18.8531
2021-04-04	0.40074	0.249491	0.357683	0.335971		2021-04-04	22.5483	20.3248	14.4266	19.0999
2021-04-05	0.400291	0.249325	0.358841	0.336152		2021-04-05	22.8296	20.5617	14.649	19.3467
2021-04-06	0.399841	0.249159	0.36	0.336333		2021-04-06	23.1105	20.7984	14.8721	19.5937
2021-04-07	0.399392	0.248993	0.361158	0.336514		2021-04-07	23.3911	21.035	15.0959	19.8407
2021-04-08	0.398942	0.248826	0.362316	0.336695		2021-04-08	23.6714	21.2713	15.3205	20.0877
2021-04-09	0.398493	0.24866	0.363475	0.336876		2021-04-09	23.9514	21.5076	15.5457	20.3349
2021-04-10	0.398043	0.248494	0.364633	0.337057		2021-04-10	24.2311	21.7437	15.7717	20.5822
2021-04-11	0.397594	0.248328	0.365792	0.337238		2021-04-11	24.5104	21.9796	15.9984	20.8295
2021-04-12	0.397144	0.248162	0.36695	0.337419		2021-04-12	24.7895	22.2153	16.2258	21.0769
2021-04-13	0.396695	0.247996	0.368108	0.3376		2021-04-13	25.0682	22.4509	16.454	21.3244
2021-04-14	0.396246	0.247829	0.367894	0.337323		2021-04-14	25.3466	22.6864	16.682	21.5717
2021-04-15	0.395796	0.247663	0.367679	0.337046		2021-04-15	25.6247	22.9217	16.9099	21.8187
2021-04-16	0.395347	0.247497	0.367465	0.33677		2021-04-16	25.9025	23.1568	17.1376	22.0656
2021-04-17	0.394897	0.247331	0.367251	0.336493		2021-04-17	26.1799	23.3918	17.3652	22.3123
2021-04-18	0.394448	0.247165	0.367036	0.336216		2021-04-18	26.4571	23.6266	17.5927	22.5588
2021-04-19	0.393998	0.246998	0.366822	0.335939		2021-04-19	26.7339	23.8613	17.82	22.8051
2021-04-20	0.393549	0.246832	0.366607	0.335663		2021-04-20	27.0104	24.0958	18.0472	23.0511
2021-04-21	0.393099	0.246666	0.366393	0.335386		2021-04-21	27.2866	24.3301	18.2743	23.297
2021-04-22	0.39265	0.2465	0.366178	0.335109		2021-04-22	27.5625	24.5643	18.5013	23.5427
2021-04-23	0.392201	0.246334	0.365964	0.334833		2021-04-23	27.8381	24.7983	18.7281	23.7881
2021-04-24	0.391751	0.246167	0.36575	0.334556		2021-04-24	28.1133	25.0322	18.9547	24.0334
2021-04-25	0.391302	0.246001	0.365535	0.334279		2021-04-25	28.3882	25.2659	19.1813	24.2785
2021-04-26	0.390852	0.245835	0.365321	0.334003		2021-04-26	28.6629	25.4994	19.4077	24.5233
2021-04-27	0.390403	0.245669	0.365106	0.333726		2021-04-27	28.9372	25.7328	19.634	24.768
2021-04-28	0.389953	0.245503	0.364892	0.333449		2021-04-28	29.2111	25.9661	19.8601	25.0124
2021-04-29	0.389504	0.245336	0.364677	0.333173		2021-04-29	29.4848	26.1992	20.0861	25.2567
2021-04-30	0.389054	0.24517	0.364463	0.332896		2021-04-30	29.7582	26.4321	20.312	25.5008
2021-05-01	0.388605	0.245004	0.364249	0.332619		2021-05-01	30.0312	26.6648	20.5378	25.7446
2021-05-02	0.388156	0.244838	0.364034	0.332343		2021-05-02	30.3039	26.8974	20.7634	25.9883
2021-05-03	0.387706	0.244672	0.36382	0.332066		2021-05-03	30.5763	27.1299	20.9889	26.2317
2021-05-04	0.388092	0.244506	0.363605	0.332068		2021-05-04	30.849	27.3622	21.2142	26.4751
2021-05-05	0.388478	0.244339	0.363391	0.33207		2021-05-05	31.122	27.5943	21.4394	26.7186
2021-05-06	0.388865	0.244173	0.363176	0.332071		2021-05-06	31.3952	27.8263	21.6645	26.962
2021-05-07	0.389251	0.244007	0.362962	0.332073		2021-05-07	31.6687	28.0581	21.8895	27.2054
2021-05-08	0.389637	0.243841	0.362748	0.332075		2021-05-08	31.9424	28.2898	22.1143	27.4488
2021-05-09	0.390023	0.243675	0.362533	0.332077		2021-05-09	32.2165	28.5213	22.339	27.6922
2021-05-10	0.390409	0.243508	0.362319	0.332079		2021-05-10	32.4908	28.7526	22.5635	27.9356
2021-05-11	0.390795	0.248575	0.362104	0.333825		2021-05-11	32.7654	28.9888	22.7879	28.1807
2021-05-12	0.391182	0.253641	0.36189	0.335571		2021-05-12	33.0402	29.2297	23.0122	28.4274
2021-05-13	0.391568	0.258708	0.361675	0.337317		2021-05-13	33.3153	29.4755	23.2364	28.6757
2021-05-14	0.391954	0.263774	0.360822	0.33885		2021-05-14	33.5907	29.7261	23.46	28.9256
2021-05-15	0.39234	0.26884	0.359969	0.340383		2021-05-15	33.8664	29.9815	23.6831	29.177
2021-05-16	0.392726	0.273907	0.359116	0.341916		2021-05-16	34.1423	30.2417	23.9057	29.4299
2021-05-17	0.393113	0.278973	0.358263	0.343449		2021-05-17	34.4185	30.5068	24.1277	29.6843
2021-05-18	0.393499	0.28404	0.357409	0.344983		2021-05-18	34.695	30.7766	24.3492	29.9403
2021-05-19	0.393885	0.289106	0.356556	0.346516		2021-05-19	34.9718	31.0513	24.5702	30.1977
2021-05-20	0.394271	0.294172	0.355703	0.348049		2021-05-20	35.2488	31.3307	24.7906	30.4567
2021-05-21	0.394657	0.299239	0.35485	0.349582		2021-05-21	35.5261	31.615	25.0106	30.7172
2021-05-22	0.395043	0.304305	0.353996	0.351115		2021-05-22	35.8036	31.9041	25.2299	30.9792
2021-05-23	0.39543	0.309372	0.353143	0.352648		2021-05-23	36.0815	32.198	25.4488	31.2428
2021-05-24	0.395816	0.314438	0.35229	0.354181		2021-05-24	36.3596	32.4968	25.6671	31.5078
2021-05-25	0.396202	0.319504	0.351437	0.355714		2021-05-25	36.6379	32.8003	25.885	31.7744
2021-05-26	0.396588	0.324571	0.350584	0.357248		2021-05-26	36.9166	33.1087	26.1022	32.0425
2021-05-27	0.396974	0.329637	0.34973	0.358781		2021-05-27	37.1955	33.4218	26.319	32.3121
2021-05-28	0.397361	0.334704	0.348877	0.360314		2021-05-28	37.4747	33.7398	26.5352	32.5832
2021-05-29	0.397747	0.33977	0.348024	0.361847		2021-05-29	37.7542	34.0626	26.7509	32.8559
2021-05-30	0.398133	0.344836	0.347171	0.36338		2021-05-30	38.0339	34.3902	26.9661	33.1301
2021-05-31	0.398519	0.349903	0.346318	0.364913		2021-05-31	38.3139	34.7226	27.1807	33.4057
2021-06-01	0.398905	0.354969	0.345464	0.366446		2021-06-01	38.5942	35.0599	27.3948	33.683
2021-06-02	0.399291	0.360036	0.344611	0.367979		2021-06-02	38.8747	35.4019	27.6084	33.9617
2021-06-03	0.399678	0.365102	0.343758	0.369512		2021-06-03	39.1555	35.7488	27.8214	34.2419
2021-06-04	0.400064	0.370168	0.342905	0.371046		2021-06-04	39.4366	36.1005	28.0339	34.5237
2021-06-05	0.40045	0.375235	0.342051	0.372579		2021-06-05	39.718	36.4569	28.2459	34.807
2021-06-06	0.400836	0.380301	0.341198	0.374112		2021-06-06	39.9996	36.8182	28.4574	35.0918
2021-06-07	0.401222	0.385368	0.340345	0.375645		2021-06-07	40.2815	37.1844	28.6683	35.3781
2021-06-08	0.401608	0.390434	0.339492	0.377178		2021-06-08	40.5637	37.5553	28.8787	35.6659
2021-06-09	0.401995	0.3955	0.338639	0.378711		2021-06-09	40.8462	37.931	29.0886	35.9553
2021-06-10	0.402381	0.400567	0.337785	0.380244		2021-06-10	41.1289	38.3116	29.298	36.2461
2021-06-11	0.402767	0.405633	0.336932	0.381777		2021-06-11	41.4119	38.6969	29.5068	36.5385
2021-06-12	0.403153	0.4107	0.336079	0.383311		2021-06-12	41.6951	39.0871	29.7151	36.8324
2021-06-13	0.403539	0.415766	0.344343	0.387883		2021-06-13	41.9787	39.4821	29.9285	37.1297
2021-06-14	0.403926	0.420832	0.352608	0.392455		2021-06-14	42.2625	39.8819	30.147	37.4305
2021-06-15	0.404312	0.425899	0.360873	0.397028		2021-06-15	42.5465	40.2865	30.3707	37.7346
2021-06-16	0.404698	0.430965	0.369137	0.4016		2021-06-16	42.8309	40.696	30.5994	38.0421
2021-06-17	0.405084	0.436032	0.377402	0.406172		2021-06-17	43.1155	41.1102	30.8333	38.353
2021-06-18	0.40547	0.441098	0.385666	0.410745		2021-06-18	43.4004	41.5293	31.0724	38.6673
2021-06-19	0.405856	0.452749	0.393931	0.417512		2021-06-19	43.6855	41.9594	31.3165	38.9871
2021-06-20	0.406243	0.4644	0.402195	0.424279		2021-06-20	43.971	42.4006	31.5658	39.3124
2021-06-21	0.406629	0.476052	0.41046	0.431047		2021-06-21	44.2567	42.8529	31.8202	39.6432
2021-06-22	0.407015	0.487703	0.418725	0.437814		2021-06-22	44.5426	43.3162	32.0797	39.9795
2021-06-23	0.407401	0.499354	0.426989	0.444581		2021-06-23	44.8289	43.7906	32.3443	40.3213
2021-06-24	0.407787	0.511005	0.435254	0.451349		2021-06-24	45.1154	44.2761	32.6141	40.6685
2021-06-25	0.408174	0.522656	0.443518	0.458116		2021-06-25	45.4022	44.7726	32.8889	41.0212
2021-06-26	0.40856	0.534307	0.451783	0.464883		2021-06-26	45.6893	45.2802	33.1689	41.3795
2021-06-27	0.408946	0.545958	0.460047	0.471651		2021-06-27	45.9766	45.7989	33.454	41.7432
2021-06-28	0.409332	0.55761	0.468312	0.478418		2021-06-28	46.2642	46.3287	33.7443	42.1124
2021-06-29	0.409718	0.569261	0.476577	0.485185		2021-06-29	46.5521	46.8695	34.0397	42.4871
2021-06-30	0.410104	0.580912	0.484841	0.491953		2021-06-30	46.8402	47.4214	34.3401	42.8672
2021-07-01	0.410491	0.592563	0.493106	0.49872		2021-07-01	47.1286	47.9843	34.6457	43.2529
2021-07-02	0.410877	0.604214	0.50137	0.505487		2021-07-02	47.4173	48.5584	34.9565	43.644
2021-07-03	0.411263	0.615865	0.509635	0.512254		2021-07-03	47.7063	49.1434	35.2723	44.0407
2021-07-04	0.411649	0.627517	0.517899	0.519022		2021-07-04	47.9955	49.7396	35.5933	44.4428
2021-07-05	0.412035	0.639168	0.526164	0.525789		2021-07-05	48.285	50.3468	35.9194	44.8504
2021-07-06	0.412421	0.650819	0.534428	0.532556		2021-07-06	48.5748	50.9651	36.2506	45.2635
2021-07-07	0.412808	0.66247	0.542693	0.539324		2021-07-07	48.8648	51.5945	36.587	45.6821
2021-07-08	0.413194	0.674121	0.550958	0.546091		2021-07-08	49.1551	52.235	36.9284	46.1062
2021-07-09	0.41358	0.685772	0.559222	0.552858		2021-07-09	49.4457	52.8865	37.275	46.5357
2021-07-10	0.413966	0.697424	0.567487	0.559626		2021-07-10	49.7366	53.549	37.6267	46.9708
2021-07-11	0.414352	0.709075	0.575751	0.566393		2021-07-11	50.0277	54.2227	37.9835	47.4113
2021-07-12	0.414739	0.720726	0.584016	0.57316		2021-07-12	50.3191	54.9074	38.3455	47.8573
2021-07-13	0.415125	0.732377	0.577968	0.575157		2021-07-13	50.6108	55.6032	38.7037	48.3059
2021-07-14	0.415511	0.744028	0.571919	0.577153		2021-07-14	50.9027	56.31	39.0582	48.757
2021-07-15	0.415897	0.735538	0.565871	0.572435		2021-07-15	51.1949	57.0088	39.4089	49.2042
2021-07-16	0.416283	0.727047	0.559823	0.567718		2021-07-16	51.4874	57.6996	39.7558	49.6476
2021-07-17	0.416669	0.718557	0.553775	0.563		2021-07-17	51.7802	58.3822	40.099	50.0871
2021-07-18	0.417056	0.710066	0.547726	0.558283		2021-07-18	52.0732	59.0568	40.4385	50.5228
2021-07-19	0.417442	0.701575	0.541678	0.553565		2021-07-19	52.3665	59.7233	40.7742	50.9547
2021-07-20	0.417828	0.693085	0.53563	0.548848		2021-07-20	52.6601	60.3818	41.1062	51.3827
2021-07-21	0.418214	0.684594	0.529581	0.54413		2021-07-21	52.9539	61.0322	41.4344	51.8068
2021-07-22	0.4186	0.676104	0.523533	0.539412		2021-07-22	53.248	61.6745	41.7588	52.2271
2021-07-23	0.418987	0.667613	0.517485	0.534695		2021-07-23	53.5424	62.3087	42.0796	52.6436
2021-07-24	0.419373	0.659123	0.511437	0.529977		2021-07-24	53.8371	62.9349	42.3965	53.0562
2021-07-25	0.419759	0.650632	0.505388	0.52526		2021-07-25	54.132	63.5531	42.7097	53.4649
2021-07-26	0.420145	0.642141	0.49934	0.520542		2021-07-26	54.4272	64.1631	43.0192	53.8698
2021-07-27	0.420531	0.633651	0.493292	0.515825		2021-07-27	54.7227	64.7651	43.3249	54.2709
2021-07-28	0.420917	0.62516	0.523069	0.523049		2021-07-28	55.0184	65.359	43.6491	54.6755
2021-07-29	0.421304	0.61667	0.552847	0.530273		2021-07-29	55.3144	65.9449	43.9918	55.0837
2021-07-30	0.42169	0.608179	0.582624	0.537498		2021-07-30	55.6107	66.5227	44.3528	55.4954
2021-07-31	0.422076	0.599689	0.612402	0.544722		2021-07-31	55.9073	67.0924	44.7324	55.9107
2021-08-01	0.422462	0.591198	0.642179	0.551946		2021-08-01	56.2041	67.6541	45.1304	56.3295
2021-08-02	0.424965	0.590725	0.671957	0.562549		2021-08-02	56.5027	68.2153	45.5468	56.7549
2021-08-03	0.427468	0.590253	0.701734	0.573152		2021-08-03	56.803	68.776	45.9817	57.1869
2021-08-04	0.429971	0.58978	0.731511	0.583754		2021-08-04	57.1051	69.3364	46.4351	57.6255
2021-08-05	0.432474	0.589308	0.761289	0.594357		2021-08-05	57.409	69.8962	46.9069	58.0707
2021-08-06	0.434977	0.588835	0.791066	0.60496		2021-08-06	57.7146	70.4556	47.3972	58.5225
2021-08-07	0.437481	0.588363	0.820844	0.615562		2021-08-07	58.022	71.0146	47.9059	58.9808
2021-08-08	0.439984	0.58789	0.850621	0.626165		2021-08-08	58.3311	71.5731	48.4331	59.4458
2021-08-09	0.442487	0.587418	0.880399	0.636768		2021-08-09	58.642	72.1312	48.9787	59.9173
2021-08-10	0.44499	0.586945	0.910176	0.64737		2021-08-10	58.9547	72.6888	49.5428	60.3954
2021-08-11	0.447493	0.586473	0.939954	0.657973		2021-08-11	59.2691	73.246	50.1254	60.8802
2021-08-12	0.449996	0.586	0.969731	0.668576		2021-08-12	59.5853	73.8027	50.7264	61.3715
2021-08-13	0.452499	0.585527	0.999508	0.679178		2021-08-13	59.9032	74.359	51.3458	61.8693
2021-08-14	0.455002	0.585055	1.02929	0.689781		2021-08-14	60.2229	74.9148	51.9838	62.3738
2021-08-15	0.457505	0.584582	1.05906	0.700384		2021-08-15	60.5443	75.4702	52.6401	62.8849
2021-08-16	0.460008	0.58411	1.08884	0.710986		2021-08-16	60.8675	76.0251	53.315	63.4025
2021-08-17	0.462511	0.583637	1.0772	0.707784		2021-08-17	61.1925	76.5796	53.9826	63.9182
2021-08-18	0.465014	0.583165	1.06557	0.704582		2021-08-18	61.5192	77.1336	54.643	64.4319
2021-08-19	0.467517	0.582692	1.05393	0.70138		2021-08-19	61.8477	77.6872	55.2961	64.9437
2021-08-20	0.47002	0.58222	1.04229	0.698178		2021-08-20	62.178	78.2403	55.9421	65.4535
2021-08-21	0.472524	0.581747	1.03066	0.694976		2021-08-21	62.51	78.793	56.5809	65.9613
2021-08-22	0.475027	0.560826	1.01902	0.684958		2021-08-22	62.8437	79.3258	57.2124	66.4607
2021-08-23	0.47753	0.539904	1.00738	0.674939		2021-08-23	63.1792	79.8387	57.8368	66.9516
2021-08-24	0.480033	0.518983	0.995748	0.664921		2021-08-24	63.5165	80.3318	58.4539	67.4341
2021-08-25	0.482536	0.498061	0.984111	0.654903		2021-08-25	63.8556	80.805	59.0638	67.9081
2021-08-26	0.485039	0.47714	0.972474	0.644884		2021-08-26	64.1963	81.2583	59.6665	68.3737
2021-08-27	0.487542	0.456218	0.97095	0.638237		2021-08-27	64.5389	81.6917	60.2683	68.833
2021-08-28	0.490045	0.435297	0.969425	0.631589		2021-08-28	64.8832	82.1052	60.8691	69.2858
2021-08-29	0.492548	0.414375	0.9679	0.624941		2021-08-29	65.2293	82.4989	61.469	69.7324
2021-08-30	0.495051	0.393454	0.966375	0.618293		2021-08-30	65.5771	82.8727	62.0679	70.1726
2021-08-31	0.497554	0.372532	0.96485	0.611646		2021-08-31	65.9267	83.2266	62.6659	70.6064
2021-09-01	0.495151	0.351611	0.963326	0.603363		2021-09-01	66.2746	83.5607	63.2629	71.0327
2021-09-02	0.492748	0.330689	0.961801	0.59508		2021-09-02	66.6208	83.8748	63.859	71.4515
2021-09-03	0.490346	0.309768	0.960276	0.586797		2021-09-03	66.9653	84.1691	64.4541	71.8629
2021-09-04	0.487943	0.288846	0.958751	0.578513		2021-09-04	67.3082	84.4435	65.0483	72.2667
2021-09-05	0.48554	0.267925	0.957227	0.57023		2021-09-05	67.6493	84.6981	65.6416	72.663
2021-09-06	0.483137	0.247003	0.949357	0.559832		2021-09-06	67.9888	84.9327	66.2299	73.0505
2021-09-07	0.480734	0.226082	0.941487	0.549434		2021-09-07	68.3265	85.1475	66.8134	73.4292
2021-09-08	0.478331	0.20516	0.933617	0.539036		2021-09-08	68.6626	85.3424	67.3921	73.799
2021-09-09	0.475928	0.184239	0.925747	0.528638		2021-09-09	68.997	85.5175	67.9658	74.1601
2021-09-10	0.473525	0.163317	0.917877	0.51824		2021-09-10	69.3297	85.6726	68.5347	74.5123
2021-09-11	0.471122	0.162597	0.910007	0.514575		2021-09-11	69.6607	85.8271	69.0987	74.8622
2021-09-12	0.468719	0.161876	0.902137	0.510911		2021-09-12	69.9901	85.9809	69.6578	75.2096
2021-09-13	0.466316	0.161155	0.894267	0.507246		2021-09-13	70.3177	86.134	70.212	75.5546
2021-09-14	0.463913	0.160434	0.886397	0.503582		2021-09-14	70.6437	86.2864	70.7614	75.8971
2021-09-15	0.461511	0.159713	0.878527	0.499917		2021-09-15	70.9679	86.4381	71.3058	76.2373
2021-09-16	0.459108	0.158992	0.857856	0.491985		2021-09-16	71.2905	86.5892	71.8375	76.5724
2021-09-17	0.456705	0.158272	0.837185	0.484054		2021-09-17	71.6114	86.7395	72.3564	76.9024
2021-09-18	0.454302	0.157551	0.816514	0.476122		2021-09-18	71.9306	86.8892	72.8624	77.2274
2021-09-19	0.451899	0.15683	0.795844	0.468191		2021-09-19	72.2481	87.0382	73.3556	77.5473
2021-09-20	0.449496	0.156109	0.775173	0.460259		2021-09-20	72.5639	87.1865	73.8361	77.8622
2021-09-21	0.447093	0.155388	0.754502	0.452328		2021-09-21	72.878	87.3342	74.3037	78.172
2021-09-22	0.44469	0.154667	0.733831	0.444396		2021-09-22	73.1905	87.4811	74.7585	78.4767
2021-09-23	0.442287	0.153947	0.71316	0.436465		2021-09-23	73.5012	87.6273	75.2005	78.7764
2021-09-24	0.439884	0.153226	0.692489	0.428533		2021-09-24	73.8103	87.7729	75.6296	79.071
2021-09-25	0.437481	0.152505	0.671818	0.420601		2021-09-25	74.1177	87.9178	76.046	79.3605
2021-09-26	0.435079	0.151784	0.664044	0.416969		2021-09-26	74.4234	88.062	76.4576	79.6476
2021-09-27	0.432676	0.151063	0.656269	0.413336		2021-09-27	74.7274	88.2055	76.8643	79.9324
2021-09-28	0.430273	0.150342	0.648495	0.409703		2021-09-28	75.0297	88.3483	77.2662	80.2148
2021-09-29	0.42787	0.149622	0.640721	0.406071		2021-09-29	75.3303	88.4905	77.6633	80.4947
2021-09-30	0.425467	0.148901	0.632946	0.402438		2021-09-30	75.6293	88.632	78.0556	80.7723
2021-10-01	0.422427	0.14818	0.625172	0.398593		2021-10-01	75.9261	88.7727	78.443	81.0473
2021-10-02	0.419386	0.147459	0.617398	0.394748		2021-10-02	76.2207	88.9128	78.8257	81.3197
2021-10-03	0.416346	0.146738	0.609623	0.390902		2021-10-03	76.5133	89.0522	79.2035	81.5897
2021-10-04	0.413306	0.146017	0.601849	0.387057		2021-10-04	76.8037	89.191	79.5765	81.857
2021-10-05	0.410266	0.145296	0.594074	0.383212		2021-10-05	77.0919	89.329	79.9447	82.1219
2021-10-06	0.407225	0.144576	0.5863	0.379367		2021-10-06	77.378	89.4663	80.308	82.3841
2021-10-07	0.404185	0.143855	0.578526	0.375522		2021-10-07	77.662	89.603	80.6666	82.6439
2021-10-08	0.401145	0.143134	0.570751	0.371677		2021-10-08	77.9439	89.739	81.0203	82.9011
2021-10-09	0.398104	0.142413	0.562977	0.367832		2021-10-09	78.2236	89.8743	81.3692	83.1557
2021-10-10	0.395064	0.141692	0.555203	0.363986		2021-10-10	78.5012	90.0089	81.7133	83.4078
2021-10-11	0.392024	0.140971	0.542571	0.358522		2021-10-11	78.7766	90.1428	82.0496	83.6563
2021-10-12	0.388984	0.140251	0.52994	0.353058		2021-10-12	79.0499	90.2761	82.378	83.9013
2021-10-13	0.385943	0.13953	0.517308	0.347594		2021-10-13	79.3211	90.4086	82.6986	84.1428
2021-10-14	0.382903	0.138809	0.504677	0.34213		2021-10-14	79.5901	90.5405	83.0114	84.3807
2021-10-15	0.379863	0.138088	0.492045	0.336665		2021-10-15	79.857	90.6717	83.3164	84.615
2021-10-16	0.376823	0.137367	0.479414	0.331201		2021-10-16	80.1218	90.8022	83.6135	84.8458
2021-10-17	0.373782	0.136646	0.466782	0.325737		2021-10-17	80.3844	90.932	83.9028	85.0731
2021-10-18	0.370742	0.135926	0.454151	0.320273		2021-10-18	80.6449	91.0611	84.1843	85.2968
2021-10-19	0.367702	0.135205	0.441519	0.314809		2021-10-19	80.9032	91.1896	84.4579	85.5169
2021-10-20	0.364662	0.134484	0.428888	0.309344		2021-10-20	81.1594	91.3174	84.7237	85.7335
2021-10-21	0.361621	0.133763	0.416256	0.30388		2021-10-21	81.4135	91.4444	84.9817	85.9466
2021-10-22	0.358581	0.133042	0.403625	0.298416		2021-10-22	81.6655	91.5708	85.2318	86.156
2021-10-23	0.355541	0.132321	0.390993	0.292952		2021-10-23	81.9153	91.6965	85.4742	86.362
2021-10-24	0.3525	0.131601	0.378362	0.287488		2021-10-24	82.1629	91.8216	85.7087	86.5644
2021-10-25	0.34946	0.13088	0.365731	0.282023		2021-10-25	82.4085	91.9459	85.9353	86.7632
2021-10-26	0.34642	0.130159	0.353099	0.276559		2021-10-26	82.6519	92.0696	86.1542	86.9585
2021-10-27	0.34338	0.129438	0.340468	0.271095		2021-10-27	82.8931	92.1925	86.3652	87.1503
2021-10-28	0.340339	0.128717	0.327836	0.265631		2021-10-28	83.1323	92.3148	86.5683	87.3385
2021-10-29	0.337299	0.127996	0.315205	0.260167		2021-10-29	83.3693	92.4364	86.7637	87.5231
2021-10-30	0.334259	0.127275	0.302573	0.254703		2021-10-30	83.6041	92.5573	86.9512	87.7042
2021-10-31	0.331219	0.126555	0.302724	0.253499		2021-10-31	83.8368	92.6776	87.1388	87.8844
2021-11-01	0.328178	0.125834	0.302874	0.252295		2021-11-01	84.0674	92.7971	87.3265	88.0637
2021-11-02	0.325138	0.125113	0.303025	0.251092		2021-11-02	84.2959	92.916	87.5143	88.2421
2021-11-03	0.322098	0.124392	0.303175	0.249888		2021-11-03	84.5222	93.0342	87.7022	88.4195
2021-11-04	0.319058	0.123671	0.303326	0.248685		2021-11-04	84.7463	93.1517	87.8902	88.5961
2021-11-05	0.316017	0.12295	0.303477	0.247481		2021-11-05	84.9684	93.2685	88.0783	88.7717
2021-11-06	0.312977	0.12223	0.303627	0.246278		2021-11-06	85.1883	93.3846	88.2665	88.9465
2021-11-07	0.309937	0.121509	0.303778	0.245074		2021-11-07	85.4061	93.5	88.4548	89.1203
2021-11-08	0.306897	0.120788	0.303928	0.243871		2021-11-08	85.6217	93.6148	88.6431	89.2932
2021-11-09	0.303856	0.120067	0.304079	0.242667		2021-11-09	85.8352	93.7288	88.8316	89.4652
2021-11-10	0.303904	0.119346	0.304229	0.242493		2021-11-10	86.0487	93.8422	89.0201	89.637
2021-11-11	0.303952	0.118625	0.30438	0.242319		2021-11-11	86.2623	93.9549	89.2088	89.8087
2021-11-12	0.304	0.117905	0.304531	0.242145		2021-11-12	86.4759	94.0669	89.3975	89.9801
2021-11-13	0.304047	0.117184	0.304681	0.241971		2021-11-13	86.6895	94.1783	89.5863	90.1514
2021-11-14	0.304095	0.116463	0.304832	0.241797		2021-11-14	86.9031	94.2889	89.7753	90.3224
2021-11-15	0.304143	0.115885	0.304982	0.24167		2021-11-15	87.1168	94.399	89.9643	90.4934
2021-11-16	0.304191	0.115307	0.305133	0.241544		2021-11-16	87.3306	94.5086	90.1534	90.6642
2021-11-17	0.304239	0.114729	0.305283	0.241417		2021-11-17	87.5443	94.6175	90.3426	90.8348
2021-11-18	0.304287	0.114151	0.305434	0.241291		2021-11-18	87.7581	94.726	90.5319	91.0053
2021-11-19	0.304334	0.113573	0.305585	0.241164		2021-11-19	87.972	94.8339	90.7213	91.1757
2021-11-20	0.304382	0.112996	0.305735	0.241038		2021-11-20	88.1858	94.9412	90.9108	91.3459
2021-11-21	0.30443	0.112418	0.305886	0.240911		2021-11-21	88.3997	95.048	91.1003	91.516
2021-11-22	0.304478	0.11184	0.306036	0.240785		2021-11-22	88.6136	95.1543	91.29	91.686
2021-11-23	0.304526	0.111262	0.306187	0.240658		2021-11-23	88.8276	95.26	91.4798	91.8558
2021-11-24	0.304573	0.110684	0.306337	0.240532		2021-11-24	89.0416	95.3652	91.6696	92.0255
2021-11-25	0.304621	0.110106	0.306488	0.240405		2021-11-25	89.2556	95.4698	91.8596	92.195
2021-11-26	0.304669	0.109528	0.306639	0.240279		2021-11-26	89.4697	95.5738	92.0496	92.3644
2021-11-27	0.304717	0.10895	0.306789	0.240152		2021-11-27	89.6838	95.6773	92.2398	92.5336
2021-11-28	0.304765	0.108372	0.30694	0.240026		2021-11-28	89.8979	95.7803	92.43	92.7027
2021-11-29	0.304812	0.107794	0.30709	0.239899		2021-11-29	90.1121	95.8827	92.6203	92.8717
2021-11-30	0.30486	0.107217	0.305423	0.239167		2021-11-30	90.3263	95.9845	92.8096	93.0401
2021-12-01	0.304908	0.106639	0.303755	0.238434		2021-12-01	90.5405	96.0859	92.9979	93.2081
2021-12-02	0.304956	0.106061	0.302088	0.237702		2021-12-02	90.7548	96.1866	93.1851	93.3755
2021-12-03	0.305004	0.105483	0.300421	0.236969		2021-12-03	90.9691	96.2868	93.3713	93.5424
2021-12-04	0.305052	0.104905	0.298753	0.236237		2021-12-04	91.1834	96.3865	93.5564	93.7088
2021-12-05	0.305099	0.104327	0.297086	0.235504		2021-12-05	91.3978	96.4856	93.7406	93.8747
2021-12-06	0.305147	0.103749	0.295418	0.234772		2021-12-06	91.6122	96.5842	93.9236	94.04
2021-12-07	0.305195	0.103171	0.293751	0.234039		2021-12-07	91.8266	96.6822	94.1057	94.2048
2021-12-08	0.305243	0.102593	0.292083	0.233307		2021-12-08	92.0411	96.7797	94.2867	94.3692
2021-12-09	0.305291	0.102016	0.290416	0.232574		2021-12-09	92.2556	96.8766	94.4667	94.533
2021-12-10	0.305338	0.101438	0.288749	0.231842		2021-12-10	92.4701	96.9729	94.6457	94.6962
2021-12-11	0.305386	0.10086	0.287081	0.231109		2021-12-11	92.6847	97.0688	94.8236	94.859
2021-12-12	0.305434	0.100282	0.285414	0.230377		2021-12-12	92.8993	97.164	95.0005	95.0213
2021-12-13	0.305482	0.099704	0.283746	0.229644		2021-12-13	93.1139	97.2588	95.1763	95.183
2021-12-14	0.30553	0.0991261	0.282079	0.228912		2021-12-14	93.3286	97.3529	95.3512	95.3442
2021-12-15	0.305577	0.0985482	0.280411	0.228179		2021-12-15	93.5433	97.4466	95.5249	95.5049
2021-12-16	0.305625	0.0979704	0.278744	0.227447		2021-12-16	93.758	97.5396	95.6977	95.6651
2021-12-17	0.305673	0.0973925	0.277077	0.226714		2021-12-17	93.9728	97.6322	95.8694	95.8248
2021-12-18	0.305721	0.0968146	0.275409	0.225982		2021-12-18	94.1876	97.7241	96.0401	95.984
2021-12-19	0.305769	0.0962367	0.273742	0.225249		2021-12-19	94.4024	97.8156	96.2098	96.1426
2021-12-20	0.305817	0.0956588	0.272074	0.224517		2021-12-20	94.6173	97.9064	96.3784	96.3007
2021-12-21	0.305864	0.0950809	0.270407	0.223784		2021-12-21	94.8322	97.9968	96.546	96.4583
2021-12-22	0.305912	0.094503	0.268739	0.223051		2021-12-22	95.0472	98.0866	96.7125	96.6154
2021-12-23	0.30596	0.0939251	0.267072	0.222319		2021-12-23	95.2621	98.1758	96.878	96.772
2021-12-24	0.306008	0.0933472	0.265404	0.221586		2021-12-24	95.4771	98.2645	97.0425	96.928
2021-12-25	0.306056	0.0927693	0.263737	0.220854		2021-12-25	95.6922	98.3526	97.206	97.0836
2021-12-26	0.306103	0.0921915	0.26207	0.220121		2021-12-26	95.9072	98.4402	97.3684	97.2386
2021-12-27	0.306151	0.0916136	0.260402	0.219389		2021-12-27	96.1224	98.5272	97.5298	97.3931
2021-12-28	0.306199	0.0910357	0.258735	0.218656		2021-12-28	96.3375	98.6137	97.6901	97.5471
2021-12-29	0.306247	0.0904578	0.257067	0.217924		2021-12-29	96.5527	98.6997	97.8495	97.7006
2021-12-30	0.306295	0.0898799	0.252338	0.216171		2021-12-30	96.7679	98.785	98.0059	97.8529
2021-12-31	0.306342	0.089302	0.247609	0.214418		2021-12-31	96.9831	98.8699	98.1593	98.0041
2022-01-01	0.30639	0.0887241	0.24288	0.212665		2022-01-01	97.1984	98.9542	98.3098	98.1541
2022-01-02	0.306438	0.0881462	0.238151	0.210912		2022-01-02	97.4137	99.0379	98.4574	98.303
2022-01-03	0.306486	0.0875683	0.233422	0.209159		2022-01-03	97.629	99.1211	98.6021	98.4508
2022-01-04	0.306534	0.0869904	0.228693	0.207406		2022-01-04	97.8444	99.2038	98.7438	98.5973
2022-01-05	0.306581	0.0864126	0.223964	0.205653		2022-01-05	98.0598	99.2858	98.8826	98.7428
2022-01-06	0.306629	0.0858347	0.219235	0.2039		2022-01-06	98.2753	99.3674	99.0185	98.8871
2022-01-07	0.306677	0.0852568	0.214506	0.202147		2022-01-07	98.4907	99.4484	99.1515	99.0302
2022-01-08	0.306725	0.0846789	0.209777	0.200394		2022-01-08	98.7062	99.5288	99.2815	99.1722
2022-01-09	0.306773	0.084101	0.205048	0.198641		2022-01-09	98.9218	99.6087	99.4086	99.313
2022-01-10	0.306821	0.0835231	0.200319	0.196888		2022-01-10	99.1374	99.6881	99.5327	99.4527
2022-01-11	0.306868	0.0829452	0.19559	0.195135		2022-01-11	99.353	99.7669	99.6539	99.5913
2022-01-12	0.306916	0.0823673	0.190861	0.193382		2022-01-12	99.5686	99.8451	99.7722	99.7287
2022-01-13	0.306964	0.0817894	0.186132	0.191628		2022-01-13	99.7843	99.9228	99.8876	99.8649
2022-01-14	0.307012	0.0812115	0.181403	0.189875		2022-01-14	100	100	100	100

## Sheet: All seasonal growth models fina
	Iceland shallow (10-20m)				Norwegian Trench 242m				Viking Banks (100m)				Baltic Sea	Mecklenburg Bight 25m	Fehmarn Belt 34m	Fehmarn Belt 34m	Fehmarn Belt 11m
		A. islandica				A. islandica				A. islandica			Date	A. islandica	A. islandica	Astarte elliptica	Astarte borealis
Date	daily growth	cumulative		Date	daily growth	cumulative		Date	daily growth	cumulative					Cumulative seasonal growth models
													2020-09-25	0.00851856
													2020-09-26	0.0170371
													2020-09-27	0.0255557
													2020-09-28	0.0340742
													2020-09-29	0.0425928
													2020-09-30	0.0511113
													2020-10-01	0.0596299
													2020-10-02	0.0681485
													2020-10-03	0.076667
													2020-10-04	0.0851856
													2020-10-05	0.0937041
													2020-10-06	0.102223
													2020-10-07	0.110741
													2020-10-08	0.11926
													2020-10-09	0.127778
													2020-10-10	0.170593
													2020-10-11	0.403258
													2020-10-12	0.635923
													2020-10-13	0.868588
													2020-10-14	1.10125
2020-10-15	0.117186	0.104642											2020-10-15	1.33392
2020-10-16	0.115208	0.20755											2020-10-16	1.56658
2020-10-17	0.11323	0.308721											2020-10-17	1.79925
2020-10-18	0.111252	0.408158											2020-10-18	2.03191
2020-10-19	0.109275	0.505859											2020-10-19	2.26458
2020-10-20	0.107297	0.601825											2020-10-20	2.49724
2020-10-21	0.105319	0.696056											2020-10-21	2.73805
2020-10-22	0.103341	0.788551											2020-10-22	2.97886
2020-10-23	0.101363	0.879312											2020-10-23	3.21967
2020-10-24	0.0993855	0.968337											2020-10-24	3.46048
2020-10-25	0.0974076	1.05563											2020-10-25	3.70129
2020-10-26	0.0954298	1.14118											2020-10-26	3.9421
2020-10-27	0.093452	1.225											2020-10-27	4.18291
2020-10-28	0.0931009	1.30853											2020-10-28	4.42372
2020-10-29	0.0927497	1.39178											2020-10-29	4.66453
2020-10-30	0.0923986	1.47473											2020-10-30	4.90534
2020-10-31	0.0920475	1.55741											2020-10-31	5.14615
2020-11-01	0.0916964	1.63979											2020-11-01	5.38696
2020-11-02	0.0917478	1.72228											2020-11-02	5.61052	0.141448
2020-11-03	0.0917991	1.80489											2020-11-03	5.83409	0.282896
2020-11-04	0.0918505	1.88761											2020-11-04	6.05765	0.424345
2020-11-05	0.0919019	1.97044											2020-11-05	6.28122	0.565793
2020-11-06	0.0919533	2.05337											2020-11-06	6.50478	0.707241
2020-11-07	0.0920047	2.13642											2020-11-07	6.72835	0.848689
2020-11-08	0.0920561	2.21959											2020-11-08	6.95191	0.990137
2020-11-09	0.0921075	2.30286											2020-11-09	7.17548	1.13159
2020-11-10	0.0921589	2.38624											2020-11-10	7.39904	1.27303
2020-11-11	0.0927171	2.47013											2020-11-11	7.62261	1.41448
2020-11-12	0.0932753	2.55454											2020-11-12	7.84617	1.55593	0.252565	0.134363
2020-11-13	0.0938335	2.63945											2020-11-13	8.06974	1.69738	0.50513	0.268726
2020-11-14	0.0943917	2.72488											2020-11-14	8.2933	1.83883	0.757696	0.403089
2020-11-15	0.0949499	2.81082											2020-11-15	8.51687	1.98027	1.01026	0.537452
2020-11-16	0.0955081	2.89727											2020-11-16	8.74043	2.12172	1.26283	0.671815
2020-11-17	0.0960663	2.98423											2020-11-17	8.964	2.39286	1.51539	0.806178
2020-11-18	0.0966245	3.0717											2020-11-18	9.18756	2.66399	1.76796	0.940541
2020-11-19	0.0971827	3.15969											2020-11-19	9.41113	2.94139	2.02052	1.0749
2020-11-20	0.0977409	3.24818											2020-11-20	9.63469	3.2188	2.19949	1.20927
2020-11-21	0.0982991	3.33719											2020-11-21	9.85826	3.4962	2.37845	1.34363
2020-11-22	0.0989354	3.42678											2020-11-22	10.0818	3.77361	2.55742	1.47799
2020-11-23	0.0995717	3.51695											2020-11-23	10.3054	4.05101	2.73639	1.61236
2020-11-24	0.100208	3.6077											2020-11-24	10.529	4.32842	2.91535	1.74672
2020-11-25	0.100844	3.69903											2020-11-25	10.7525	4.60582	3.13993	1.88108
2020-11-26	0.101481	3.79095											2020-11-26	10.9761	4.81805	3.36452	2.01545
2020-11-27	0.102117	3.88345											2020-11-27	11.1997	5.03028	3.5891	2.14981
2020-11-28	0.102753	3.97653											2020-11-28	11.4232	5.24251	3.81368	2.28417
2020-11-29	0.10339	4.07019											2020-11-29	11.6468	5.45474	4.03826	2.41853
2020-11-30	0.104026	4.16443											2020-11-30	11.8703	5.66696	4.26284	2.5529
2020-12-01	0.104662	4.25926											2020-12-01	12.0939	5.87919	4.48743	2.68726
2020-12-02	0.105036	4.35441											2020-12-02	12.5265	6.09142	4.71201	2.82162
2020-12-03	0.10541	4.44988											2020-12-03	12.9592	6.30365	4.93659	2.95599
2020-12-04	0.105784	4.54568											2020-12-04	13.3918	6.51588	5.16117	3.09035
2020-12-05	0.106158	4.64179											2020-12-05	13.8245	6.72811	5.38575	3.22471
2020-12-06	0.106532	4.73823											2020-12-06	14.2571	6.94034	5.61034	3.35908
2020-12-07	0.106906	4.835											2020-12-07	14.6897	7.15256	5.83492	3.49344
2020-12-08	0.10728	4.93208											2020-12-08	15.1224	7.36479	6.0595	3.6278
2020-12-09	0.107654	5.02949											2020-12-09	15.555	7.5184	6.28408	3.76216
2020-12-10	0.108028	5.12722											2020-12-10	15.9877	7.67201	6.52519	3.89653
2020-12-11	0.108403	5.22527											2020-12-11	16.3631	7.82561	6.76629	4.03089
2020-12-12	0.108777	5.32365											2020-12-12	16.7385	7.97922	7.0074	4.16525
2020-12-13	0.109151	5.42235											2020-12-13	17.1139	8.13283	7.2485	4.3354
2020-12-14	0.109525	5.52137											2020-12-14	17.4893	8.28644	7.48961	4.50555
2020-12-15	0.109899	5.62072											2020-12-15	17.8647	8.44004	7.73071	4.6757
2020-12-16	0.110615	5.72072											2020-12-16	18.338	8.59365	7.97182	4.90785
2020-12-17	0.111331	5.82139											2020-12-17	18.8113	8.74726	8.21292	5.14001
2020-12-18	0.112047	5.92272											2020-12-18	19.2847	8.90086	8.45403	5.37217
2020-12-19	0.112763	6.02471											2020-12-19	19.758	9.05447	8.69514	5.60433
2020-12-20	0.113479	6.12736											2020-12-20	20.2313	9.20808	9.02479	5.83649
2020-12-21	0.114195	6.23068											2020-12-21	20.6556	9.36169	9.35444	6.06865
2020-12-22	0.114911	6.33465											2020-12-22	21.0798	9.51529	9.6841	6.3008
2020-12-23	0.115627	6.43929											2020-12-23	21.5041	9.6689	10.0138	6.53296
2020-12-24	0.116343	6.54458											2020-12-24	21.9283	9.82251	10.3434	6.76512
2020-12-25	0.117059	6.65054											2020-12-25	22.3526	10.0712	10.6731	6.99728
2020-12-26	0.117776	6.75716											2020-12-26	22.772	10.3198	11.0027	7.22944
2020-12-27	0.118492	6.86445											2020-12-27	23.1914	10.5685	11.3324	7.4616
2020-12-28	0.119208	6.97239											2020-12-28	23.6108	10.8171	11.662	7.69376
2020-12-29	0.119924	7.08099											2020-12-29	24.0302	11.1688	11.9917	7.92591
2020-12-30	0.120658	7.19028											2020-12-30	24.4497	11.5204	12.3213	8.15807
2020-12-31	0.121302	7.30015											2020-12-31	25.0124	11.8721	12.651	8.39023
2021-01-01	0.121946	7.4106											2021-01-01	25.4233	12.2237	12.9806	8.62239
2021-01-02	0.12259	7.52165											2021-01-02	25.8341	12.5754	13.3103	8.85455
2021-01-03	0.123234	7.63328											2021-01-03	26.2449	12.927	13.5814	9.08671
2021-01-04	0.123878	7.7455											2021-01-04	26.6557	13.2787	13.8526	9.31887
2021-01-05	0.124522	7.8583											2021-01-05	27.0666	13.6303	14.1238	9.55102
2021-01-06	0.125166	7.97169											2021-01-06	27.5717	13.982	14.3949	9.78318
2021-01-07	0.12581	8.08567											2021-01-07	28.0768	14.3336	14.6661	10.0355
2021-01-08	0.126454	8.20024											2021-01-08	28.5819	14.6853	14.9372	10.2879
2021-01-09	0.127098	8.31539											2021-01-09	29.087	15.0644	15.2084	10.5402
2021-01-10	0.127742	8.43113											2021-01-10	29.68	15.4434	15.4795	10.7926
2021-01-11	0.128251	8.54732											2021-01-11	30.2292	15.8225	15.7507	11.0449
2021-01-12	0.128761	8.66397											2021-01-12	30.7785	16.2016	16.0219	11.2973
2021-01-13	0.12927	8.78107											2021-01-13	31.3277	16.5807	16.293	11.5496
2021-01-14	0.129779	8.89862											2021-01-14	31.8769	16.9598	16.5642	11.802
2021-01-15	0.130289	9.01663						2021-01-15	0.258757	0.194694			2021-01-15	32.4261	17.3388	16.8353	12.0543
2021-01-16	0.130755	9.13505						2021-01-16	0.26111	0.391143			2021-01-16	32.9399	17.8084	17.0514	12.3067
2021-01-17	0.131221	9.25389						2021-01-17	0.263463	0.589348			2021-01-17	33.4538	18.2779	17.2676	12.559
2021-01-18	0.131687	9.37314						2021-01-18	0.265816	0.789307			2021-01-18	33.9676	18.7474	17.4837	12.8114
2021-01-19	0.132152	9.4928						2021-01-19	0.268169	0.991023			2021-01-19	34.4815	19.2169	17.6998	13.0637
2021-01-20	0.132618	9.61288						2021-01-20	0.270522	1.19449			2021-01-20	34.9953	19.6865	17.9159	13.3161
2021-01-21	0.132936	9.73323						2021-01-21	0.272875	1.39972			2021-01-21	35.5092	20.156	18.132	13.5684
2021-01-22	0.133254	9.85384						2021-01-22	0.275228	1.6067			2021-01-22	36.023	20.6255	18.3481	13.8207
2021-01-23	0.133572	9.97473						2021-01-23	0.277581	1.81544			2021-01-23	36.5369	21.095	18.5642	14.0731
2021-01-24	0.13389	10.0959						2021-01-24	0.279934	2.02593			2021-01-24	37.0507	21.5646	18.7803	14.3254
2021-01-25	0.134208	10.2173						2021-01-25	0.282287	2.23817			2021-01-25	37.4073	22.0341	18.9964	14.5778
2021-01-26	0.134526	10.339						2021-01-26	0.28464	2.45218			2021-01-26	37.7639	22.5036	19.2125	14.8301
2021-01-27	0.134843	10.4609						2021-01-27	0.286993	2.66793			2021-01-27	38.1206	22.8725	19.4286	15.0825
2021-01-28	0.135161	10.5832						2021-01-28	0.289346	2.88545			2021-01-28	38.4772	23.2415	19.6447	15.3348
2021-01-29	0.135479	10.7057						2021-01-29	0.291699	3.10472			2021-01-29	38.8007	23.6104	19.8609	15.5872
2021-01-30	0.135797	10.8284						2021-01-30	0.294052	3.32574			2021-01-30	39.1243	23.9794	20.0856	15.8395
2021-01-31	0.135696	10.951						2021-01-31	0.296405	3.54852			2021-01-31	39.4706	24.3483	20.3104	16.0919
2021-02-01	0.135595	11.0735						2021-02-01	0.298758	3.77305			2021-02-01	39.817	24.7172	20.5352	16.3442
2021-02-02	0.135494	11.1958						2021-02-02	0.301111	3.99934			2021-02-02	40.1633	25.0862	20.7599	16.6569
2021-02-03	0.135393	11.318						2021-02-03	0.303464	4.22739			2021-02-03	40.5096	25.4551	20.9847	16.9696
2021-02-04	0.135292	11.44						2021-02-04	0.305817	4.45719			2021-02-04	40.856	25.824	21.2095	17.2822
2021-02-05	0.135191	11.5619						2021-02-05	0.30817	4.68874			2021-02-05	41.2023	26.193	21.4342	17.5949
2021-02-06	0.134914	11.6835						2021-02-06	0.310523	4.92205			2021-02-06	41.5486	26.5619	21.659	17.9076
2021-02-07	0.134637	11.8047						2021-02-07	0.312876	5.15712			2021-02-07	41.895	26.9309	21.8838	18.2202
2021-02-08	0.13436	11.9257						2021-02-08	0.31523	5.39394			2021-02-08	42.2413	27.2911	22.1086	18.5329
2021-02-09	0.134083	12.0463						2021-02-09	0.317583	5.63252			2021-02-09	42.5875	27.6514	22.2835	18.869
2021-02-10	0.133805	12.1667						2021-02-10	0.319936	5.87285			2021-02-10	42.9336	28.0117	22.4584	19.2052
2021-02-11	0.134597	12.2877						2021-02-11	0.322289	6.11493			2021-02-11	43.4121	28.372	22.6333	19.5413
2021-02-12	0.135388	12.4096						2021-02-12	0.324642	6.35878			2021-02-12	43.8906	28.7323	22.8082	19.8774
2021-02-13	0.136179	12.5321						2021-02-13	0.325856	6.60357			2021-02-13	44.3691	29.0925	22.9831	20.2135
2021-02-14	0.13697	12.6554						2021-02-14	0.32707	6.84933			2021-02-14	44.8476	29.4528	23.1598	20.5496
2021-02-15	0.137761	12.7795		2021-02-15	0.201555	0.179862		2021-02-15	0.328284	7.09603			2021-02-15	45.3261	29.8131	23.3365	20.8858
2021-02-16	0.138553	12.9043		2021-02-16	0.205531	0.363235		2021-02-16	0.329498	7.3437			2021-02-16	45.8046	30.1734	23.5639	21.2219
2021-02-17	0.139344	13.0299		2021-02-17	0.209508	0.550118		2021-02-17	0.330712	7.59231			2021-02-17	46.283	30.5337	23.7913	21.558
2021-02-18	0.140135	13.1562		2021-02-18	0.213485	0.740512		2021-02-18	0.331926	7.84189			2021-02-18	46.7615	30.8901	24.0187	21.8941
[truncated: 361 more rows]

[truncated: 1 more sheets: Alignment reference data]
